# Supplementary material for: Evaluation of in silico predictors on short nucleotide variants in HBA1, HBA2, and HBB associated with haemoglobinopathies
Source: eLife. 2022 Dec 1;11:e79713. doi: 10.7554/eLife.79713 (PMC9731569; doi:10.7554/eLife.79713)
Supplement: Supplementary file 2. [file elife-79713-supp2.xlsx]

## Sheet: Input-Full dataset
ithaID	Vep_input	HGVS	HGVS_transcript	HGVS_protein	Initial_observed_pathogenicity	Observed_pathogenicity	Effect_function	Location	Consequence	SIFT_score	integrated_fitCons_score	MutationTaster_score	LRT_score	PolyPhen_score	SpliceAI_DS	ClinPred_score	DANN_score	LIST-S2_score_seperated	MetaSVM_score	MutPred_score	REVEL_score	VEST4_score_seperated	fathmm-MKL_coding_score	ada_score	rf_score	Condel_score	MetaLR_score	GERP++_RS	Eigen-PC-phred_coding	BayesDel_addAF_score	FATHMM_score_seperated	MutationAssessor_standalone_score	PROVEAN_score_seperated	CADD_PHRED	phyloP100way_vertebrate	phyloP30way_mammalian	phastCons30way_mammalian	phastCons17way_primate	SiPhy_29way_logOdds	Eigen-phred_coding	MaxEntScan_diff	MaxEntScan_score
1	NC_000011.9:g.5248491C>T	HBB:c.-240G>A	NM_000518.4:c.-240G>A		VUS	P/LP	Promoter	11:5248491-5248491	upstream_gene_variant																									1.25
2	NC_000011.9:g.5248403G>T	HBB:c.-152C>A	NM_000518.4:c.-152C>A		VUS	VUS	Promoter	11:5248403-5248403	upstream_gene_variant																									12.6
3	NC_000011.9:g.5248402G>A	HBB:c.-151C>T	NM_000518.4:c.-151C>T		VUS	P/LP	Promoter	11:5248402-5248402	upstream_gene_variant																									16.4
4	NC_000011.9:g.5248402G>C	HBB:c.-151C>G	NM_000518.4:c.-151C>G		VUS	VUS	Promoter	11:5248402-5248402	upstream_gene_variant																									16.06
5	NC_000011.9:g.5248394G>C	HBB:c.-143C>G	NM_000518.4:c.-143C>G		P/LP	VUS	Promoter	11:5248394-5248394	upstream_gene_variant																									13.78
6	NC_000011.9:g.5248393G>A	HBB:c.-142C>T	NM_000518.4:c.-142C>T		VUS	P/LP	Promoter	11:5248393-5248393	upstream_gene_variant																									15.13
7	NC_000011.9:g.5248391G>A	HBB:c.-140C>T	NM_000518.4:c.-140C>T		P/LP	P/LP	Promoter	11:5248391-5248391	upstream_gene_variant																									16.47
8	NC_000011.9:g.5248389G>A	HBB:c.-138C>T	NM_000518.4:c.-138C>T		VUS	P/LP	Promoter	11:5248389-5248389	upstream_gene_variant																									15.93
9	NC_000011.9:g.5248389G>T	HBB:c.-138C>A	NM_000518.4:c.-138C>A		P/LP	P/LP	Promoter	11:5248389-5248389	upstream_gene_variant																									15.67
10	NC_000011.9:g.5248388G>C	HBB:c.-137C>G	NM_000518.4:c.-137C>G		VUS	P/LP	Promoter	11:5248388-5248388	upstream_gene_variant																									14.94
11	NC_000011.9:g.5248388G>A	HBB:c.-137C>T	NM_000518.4:c.-137C>T		VUS	P/LP	Promoter	11:5248388-5248388	upstream_gene_variant																									15.25
12	NC_000011.9:g.5248388G>T	HBB:c.-137C>A	NM_000518.4:c.-137C>A		VUS	P/LP	Promoter	11:5248388-5248388	upstream_gene_variant																									14.99
13	NC_000011.9:g.5248387G>C	HBB:c.-136C>G	NM_000518.4:c.-136C>G		P/LP	P/LP	Promoter	11:5248387-5248387	upstream_gene_variant																									12.36
14	NC_000011.9:g.5248387G>T	HBB:c.-136C>A	NM_000518.4:c.-136C>A		VUS	P/LP	Promoter	11:5248387-5248387	upstream_gene_variant																									12.44
15	NC_000011.9:g.5248374T>A	HBB:c.-123A>T	NM_000518.4:c.-123A>T		VUS	P/LP	Promoter	11:5248374-5248374	upstream_gene_variant																									16.52
16	NC_000011.9:g.5248357C>G	HBB:c.-106G>C	NM_000518.4:c.-106G>C		P/LP	P/LP	Promoter	11:5248357-5248357	upstream_gene_variant																									10.88
17	NC_000011.9:g.5248351C>T	HBB:c.-100G>A	NM_000518.4:c.-100G>A		VUS	P/LP	Promoter	11:5248351-5248351	upstream_gene_variant																									12.94
18	NC_000011.9:g.5248333G>T	HBB:c.-82C>A	NM_000518.4:c.-82C>A		P/LP	P/LP	Promoter	11:5248333-5248333	upstream_gene_variant																									17.85
19	NC_000011.9:g.5248333G>A	HBB:c.-82C>T	NM_000518.4:c.-82C>T		P/LP	P/LP	Promoter	11:5248333-5248333	upstream_gene_variant																									18.22
20	NC_000011.9:g.5248332T>C	HBB:c.-81A>G	NM_000518.4:c.-81A>G		P/LP	P/LP	Promoter	11:5248332-5248332	upstream_gene_variant																									22.1
21	NC_000011.9:g.5248332T>G	HBB:c.-81A>C	NM_000518.4:c.-81A>C		P/LP	VUS	Promoter	11:5248332-5248332	upstream_gene_variant																									22
22	NC_000011.9:g.5248331A>T	HBB:c.-80T>A	NM_000518.4:c.-80T>A		P/LP	P/LP	Promoter	11:5248331-5248331	upstream_gene_variant																									22
23	NC_000011.9:g.5248331A>G	HBB:c.-80T>C	NM_000518.4:c.-80T>C		P/LP	P/LP	Promoter	11:5248331-5248331	upstream_gene_variant																									21.8
24	NC_000011.9:g.5248175_5248331del	HBB:c.-79_78delAA	NM_000518.4:c.-79_78delAA		P/LP	P/LP	Promoter	11:5248174-5248331	coding_sequence_variant,5_prime_UTR_variant
25	NC_000011.9:g.5248330T>C	HBB:c.-79A>G	NM_000518.4:c.-79A>G		P/LP	P/LP	Promoter	11:5248330-5248330	upstream_gene_variant																									22
26	NC_000011.9:g.5248330T>G	HBB:c.-79A>C	NM_000518.4:c.-79A>C		P/LP	P/LP	Promoter	11:5248330-5248330	upstream_gene_variant																									22.2
28	NC_000011.9:g.5248329T>G	HBB:c.-78A>C	NM_000518.4:c.-78A>C		P/LP	P/LP	Promoter	11:5248329-5248329	upstream_gene_variant																									19.52
29	NC_000011.9:g.5248329T>C	HBB:c.-78A>G	NM_000518.4:c.-78A>G		P/LP	P/LP	Promoter	11:5248329-5248329	upstream_gene_variant																									20.2
30	NC_000011.9:g.5248328T>A	HBB:c.-77A>T	NM_000518.4:c.-77A>T		P/LP	P/LP	Promoter	11:5248328-5248328	upstream_gene_variant																									21.7
31	NC_000011.9:g.5248329_5248330del	HBB:c.-77_-76delAA	NM_000518.4:c.-77_-76delAA		VUS	P/LP	Promoter	11:5248328-5248330	upstream_gene_variant
32	NC_000011.9:g.5248326C>G	HBB:c.-75G>C	NM_000518.4:c.-75G>C		P/LP	P/LP	Promoter	11:5248326-5248326	upstream_gene_variant																									14.55
33	NM_000518.4:c.-22dup	HBB:c.-73_-8del45	NM_000518.4:c.-73_-8del45		P/LP	P/LP	Promoter	11:5248272-5248272	5_prime_UTR_variant
34	NM_000518.4:c.-50A>C	HBB:c.-50A>C	NM_000518.4:c.-50A>C	NP_000509.1:p.?	VUS	P/LP	5'UTR	11:5248301-5248301	5_prime_UTR_variant																									14.1
35	NM_000518.4:c.-43C>T	HBB:c.-43C>T	NM_000518.4:c.-43C>T	NP_000509.1:p.?	VUS	P/LP	5'UTR	11:5248294-5248294	5_prime_UTR_variant						0																			18.26
36	NM_000518.4:c.-41delT	HBB:c.-41delT	NM_000518.4:c.-41delT	NP_000509.1:p.?	VUS	P/LP	5'UTR	11:5248291-5248292	5_prime_UTR_variant						0																			16.74
37	NM_000518.4:c.-31C>T	HBB:c.-31C>T	NM_000518.4:c.-31C>T	NP_000509.1:p.?	B/LB	B/LB	5'UTR	11:5248282-5248282	5_prime_UTR_variant						0																			11.46
38	NM_000518.4:c.-29G>A	HBB:c.-29G>A	NM_000518.4:c.-29G>A	NP_000509.1:p.?	VUS	P/LP	5'UTR	11:5248280-5248280	5_prime_UTR_variant						0									0.479915	0.574									17.61
39	NM_000518.4:c.-18C>G	HBB:c.-18C>G	NM_000518.4:c.-18C>G	NP_000509.1:p.?	VUS	P/LP	5'UTR	11:5248269-5248269	5_prime_UTR_variant															0.151149	0.26									17.86
40	NM_000518.4:c.-11_-8delAAAC	HBB:c.-11_-8delAAAC	NM_000518.4:c.-11_-8delAAAC	NP_000509.1:p.?	P/LP	P/LP	5'UTR	11:5248258-5248262	5_prime_UTR_variant						0
41	NM_000518.4:c.-6G>C	HBB:c.-6G>C	NM_000518.4:c.-6G>C	NP_000509.1:p.?	VUS	P/LP	5'UTR	11:5248257-5248257	5_prime_UTR_variant																									15.08
42	NM_000518.4:c.1A>G	HBB:c.1A>G	NM_000518.4:c.1A>G	NP_000509.1:p.(M1?)	P/LP	P/LP	Initiation codon	11:5248251-5248251	start_lost	0	0.487112	1		0.244	0	0.880765	0.980232	0.9	0.2918	0.613	0.713	0.982	0.98019			0.469	0.6098	5.24	3.69358	0.419815	-2.42		-2.08	21.4	6.813	1.137	0.905	0.458	14.3909	3.44691
43	NM_000518.4:c.1A>C	HBB:c.1A>C	NM_000518.4:c.1A>C	NP_000509.1:p.(M1?)	P/LP	P/LP	Initiation codon	11:5248251-5248251	start_lost	0.01	0.487112	1		0.102	0	0.671314	0.934751	0.9	0.1228	0.598	0.666	0.867	0.98077			0.414	0.6077	5.24	3.07893	0.399092	-2.41		-1.52	22.4	6.813	1.137	0.905	0.458	14.3909	2.74656
44	NM_000518.4:c.2T>C	HBB:c.2T>C	NM_000518.4:c.2T>C	NP_000509.1:p.(M1?)	P/LP	P/LP	Initiation codon	11:5248250-5248250	start_lost	0	0.487112	1		0.912	0	0.957857	0.98037	0.9	0.7459	0.605	0.895	0.874	0.98404			0.808	0.7923	5.24	5.66373	0.60412	-2.45		-3.15	23.6	7.928	1.311	0.878	0.413	14.3909	5.76738
45	NM_000518.4:c.2T>G	HBB:c.2T>G	NM_000518.4:c.2T>G	NP_000509.1:p.(M1?)	P/LP	P/LP	Initiation codon	11:5248250-5248250	start_lost	0	0.487112	1		0.95	0	0.954379	0.973076	0.9	0.7831	0.642	0.891	0.88	0.98549			0.838	0.8065	5.24	5.76976	0.60412	-2.48		-3.08	24.6	7.928	1.311	0.878	0.413	14.3909	5.90517
46	NM_000518.4:c.2T>A	HBB:c.2T>A	NM_000518.4:c.2T>A	NP_000509.1:p.(M1?)	P/LP	P/LP	Initiation codon	11:5248250-5248250	start_lost	0	0.487112	1		0.934		0.964053	0.961728	0.9	0.7537	0.629	0.887	0.885	0.98516			0.825	0.7957	5.24	5.73305	0.60412	-2.47		-3.13	24.3	7.928	1.311	0.878	0.413	14.3909	5.85738
47	NM_000518.4:c.3G>C	HBB:c.3G>C	NM_000518.4:c.3G>C	NP_000509.1:p.(M1?)	P/LP	P/LP	Initiation codon	11:5248249-5248249	start_lost	0	0.487112	1		0.676		0.922948	0.993698	0.9	0.6052	0.624	0.766	0.992	0.98117			0.685	0.7405	5.24	5.36865	0.60412	-2.43		-2.07	23.7	6.719	1.025	0.781	0.331	17.9125	5.30937
48	NM_000518.4:c.3G>A	HBB:c.3G>A	NM_000518.4:c.3G>A	NP_000509.1:p.(M1?)	P/LP	P/LP	Initiation codon	11:5248249-5248249	start_lost	0	0.487112	1		0.676	0	0.933352	0.994199	0.9	0.6052	0.624	0.775	0.992	0.98002			0.685	0.7405	5.24	5.36865	0.60412	-2.43		-2.07	24.4	6.719	1.025	0.781	0.331	17.9125	5.30937
49	NM_000518.4:c.3G>T	HBB:c.3G>T	NM_000518.4:c.3G>T	NP_000509.1:p.(M1?)	P/LP	P/LP	Initiation codon	11:5248249-5248249	start_lost	0	0.487112	1		0.676	0	0.934002	0.993989	0.9	0.6052	0.624	0.775	0.992	0.98088			0.685	0.7405	5.24	5.36865	0.60412	-2.43		-2.07	24	6.719	1.025	0.781	0.331	17.9125	5.30937
50	NM_000518.4:c.4delG	HBB:c.4delG	NM_000518.4:c.4delG	NP_000509.1:p.(V2Cfs*3)	P/LP	P/LP	Frameshift	11:5248247-5248248	frameshift_variant						0																			23.6
51	NM_000518.4:c.8_16delinsCTGAGGTGAAGTCTGCCTGAGGAGAAGT	HBB:c.8_16delinsCTGAGGTGAAGTCTGCCTGAGGAGAAGT	NM_000518.4:c.8_16delinsCTGAGGTGAAGTCTGCCTGAGGAGAAGT	NP_000509.1:p.(H3Pfs*7)	P/LP	P/LP	Frameshift	11:5248235-5248244	stop_gained,frameshift_variant
52	NM_000518.4:c.11dupT	HBB:c.11dupT	NM_000518.4:c.11dupT	NP_000509.1:p.(T5Dfs*3)	P/LP	P/LP	Frameshift	11:5248240-5248240	frameshift_variant
54	NM_000518.4:c.17_18delCT	HBB:c.17_18delCT	NM_000518.4:c.17_18delCT	NP_000509.1:p.(P6Rfs*17)	P/LP	P/LP	Frameshift	11:5248233-5248235	frameshift_variant						0																			18.11
56	NM_000518.4:c.19G>T	HBB:c.19G>T	NM_000518.4:c.19G>T	NP_000509.1:p.(E7*)	P/LP	P/LP	Stop gained	11:5248233-5248233	stop_gained		0.487112	1			0		0.993414					0.295	0.47089					5.24	3.61203	0.60412				36	2.632	1.025	0.005	0.017	17.9125	5.78943
57	NM_000518.4:c.20delA	HBB:c.20delA	NM_000518.4:c.20delA	NP_000509.1:p.(E7Gfs*13)	P/LP	P/LP	Frameshift	11:5248231-5248232	frameshift_variant						0																			17.62
58	NM_000518.4:c.20delG	HBB:c.20delG	NM_000518.4:c.20delG	NP_000509.1:p.(E8Rfs*12)	P/LP	P/LP	Frameshift	11:5248231-5248232	frameshift_variant						0																			17.62
59	NM_000518.4:c.20_32del13	HBB:c.20_32del13	NM_000518.4:c.20_32del13	NP_000509.1:p.(E7Afs*9)	P/LP	P/LP	Frameshift	11:5248219-5248232	frameshift_variant
60	NM_000518.4:c.22G>T	HBB:c.22G>T	NM_000518.4:c.22G>T	NP_000509.1:p.(E8*)	P/LP	P/LP	Stop gained	11:5248230-5248230	stop_gained		0.487112	1			0.01		0.997293					0.68	0.98189					5.24	10.7052	0.60412				39	5.337	1.025	0.014	0.003	17.9125	14.5802
61	NM_000518.4:c.25_26delAA	HBB:c.25_26delAA	NM_000518.4:c.25_26delAA	NP_000509.1:p.(K9Vfs*14)	P/LP	P/LP	Frameshift	11:5248225-5248227	frameshift_variant						0.02																			25.4
62	NM_000518.4:c.27dupG	HBB:c.27dupG	NM_000518.4:c.27dupG	NP_000509.1:p.(S10Vfs*14)	P/LP	P/LP	Frameshift	11:5248224-5248224	frameshift_variant																									21.5
63	NM_000518.4:c.28_29insTA	HBB:c.28_29insTA	NM_000518.4:c.28_29insTA	NP_000509.1:p.(S10Lfs*11)	P/LP	P/LP	Frameshift	11:5248223-5248223	frameshift_variant																									0.017
64	NM_000518.4:c.30dupT	HBB:c.30dupT	NM_000518.4:c.30dupT	NP_000509.1:p.(A11Cfs*13)	P/LP	P/LP	Frameshift	11:5248221-5248221	frameshift_variant																									15.21
65	NM_000518.4:c.33C>A	HBB:c.33C>A	NM_000518.4:c.33C>A	NP_000509.1:p.(A11=)	VUS	P/LP	Cryptic splice site; Synonymous substitution	11:5248219-5248219	synonymous_variant						0																			0.071
66	NM_000518.4:c.33delC	HBB:c.33delC	NM_000518.4:c.33delC	NP_000509.1:p.(V12Lfs*8)	P/LP	P/LP	Frameshift	11:5248218-5248219	frameshift_variant						0.01																			0.309
67	NM_000518.4:c.36delT	HBB:c.36delT	NM_000518.4:c.36delT	NP_000509.1:p.(T13Lfs*7)	P/LP	P/LP	Frameshift	11:5248215-5248216	frameshift_variant						0.04																			9.886
68	NM_000518.4:c.44dupT	HBB:c.44dupT	NM_000518.4:c.44dupT	NP_000509.1:p.(W16Vfs*8)	P/LP	P/LP	Frameshift	11:5248207-5248207	frameshift_variant																									25.5
69	NM_000518.4:c.45dupG	HBB:c.45dupG	NM_000518.4:c.45dupG	NP_000509.1:p.(W16Vfs*8)	P/LP	P/LP	Frameshift	11:5248206-5248206	frameshift_variant																									26.9
70	NM_000518.4:c.46delT	HBB:c.46delT	NM_000518.4:c.46delT	NP_000509.1:p.(W16Gfs*4)	P/LP	P/LP	Frameshift	11:5248205-5248206	frameshift_variant						0.03																			26
71	NM_000518.4:c.50dupG	HBB:c.50dupG	NM_000518.4:c.50dupG	NP_000509.1:p.(K18Qfs*6)	P/LP	P/LP	Frameshift	11:5248201-5248201	frameshift_variant																									24.8
72	NM_000518.4:c.47G>A	HBB:c.47G>A	NM_000518.4:c.47G>A	NP_000509.1:p.(W16*)	P/LP	P/LP	Stop gained	11:5248205-5248205	stop_gained		0.487112	1			0.04		0.995421					0.664	0.89026					4.32	4.79463	0.350601				39	1.621	1.025	0.587	0.542	14.3515	6.21734
73	NM_000518.4:c.48G>A	HBB:c.48G>A	NM_000518.4:c.48G>A	NP_000509.1:p.(W16*)	P/LP	P/LP	Stop gained	11:5248204-5248204	stop_gained		0.487112	1			0.06		0.995261					0.664	0.93214					4.32	4.97168	0.60412				38	2.709	1.025	0.571	0.548	14.3515	6.44964
74	NM_000518.4:c.50delG	HBB:c.50delG	NM_000518.4:c.50delG	NP_000509.1:p.(G17Afs*3)	P/LP	P/LP	Frameshift	11:5248201-5248202	frameshift_variant						0.06																			23
75	NM_000518.4:c.51delC	HBB:c.51delC	NM_000518.4:c.51delC	NP_000509.1:p.(K18Rfs*2)	P/LP	P/LP	Frameshift	11:5248200-5248201	frameshift_variant						0.04																			23.6
76	NM_000518.4:c.51C>T	HBB:c.51C>T	NM_000518.4:c.51C>T	NP_000509.1:p.(G17=)	VUS	P/LP	Cryptic splice site; Synonymous substitution	11:5248201-5248201	synonymous_variant						0.01																			13.76
77	NM_000518.4:c.52A>T	HBB:c.52A>T	NM_000518.4:c.52A>T	NP_000509.1:p.(K18*)	P/LP	P/LP	Stop gained	11:5248200-5248200	stop_gained		0.487112	1					0.995607					0.712	0.98415					5.24	6.87881	0.365521				42	5.559	1.137	0.488	0.496	14.3909	8.79568
78	NM_000518.4:c.53dupA	HBB:c.53dupA	NM_000518.4:c.53dupA	NP_000509.1:p.(V19Gfs*5)	P/LP	P/LP	Frameshift	11:5248198-5248198	frameshift_variant																									26.3
79	NM_000518.4:c.59A>G	HBB:c.59A>G	NM_000518.4:c.59A>G	NP_000509.1:p.(N20S)	P/LP	P/LP	Missense codons, Cryptic splice site	11:5248193-5248193	missense_variant	0.06	0.487112	0.999678		0.041	0.04	0.176827	0.981591	0.887111	-0.1742	0.678	0.46	0.779	0.78219			0.325	0.5909	4.04	1.6155	0.0557601	-2.12		-2.56	20.3	1.852	1.137	0.032	0.038	11.8001	1.63592
80	NM_000518.4:c.64_67del	HBB:c.64_67del	NM_000518.4:c.64_67del	NP_000509.1:p.(D22Kfs*39)	VUS	P/LP	Frameshift	11:5248184-5248188	frameshift_variant						0																			23.5
81	NM_000518.4:c.64dupG	HBB:c.64dupG	NM_000518.4:c.64dupG	NP_000509.1:p.(D22Gfs*2)	P/LP	P/LP	Frameshift	11:5248187-5248187	frameshift_variant																									23.9
83	NM_000518.4:c.67G>T	HBB:c.67G>T	NM_000518.4:c.67G>T	NP_000509.1:p.(E23*)	P/LP	P/LP	Stop gained	11:5248185-5248185	stop_gained		0.487112	1			0.11		0.989256					0.385	0.52341					-0.266	1.53133	0.60412				35	2.212	0.108	0.037	0.066	2.0509	2.69424
84	NM_000518.4:c.68_74delAAGTTGG	HBB:c.68_74delAAGTTGG	NM_000518.4:c.68_74delAAGTTGG	NP_000509.1:p.(E23Vfs*37)	P/LP	P/LP	Frameshift	11:5248177-5248184	frameshift_variant																									33
85	NM_000518.4:c.74delinsCAC	HBB:c.74delinsCAC	NM_000518.4:c.74delinsCAC	NP_000509.1:p.(G25Afs*38)	P/LP	P/LP	Frameshift	11:5248177-5248178	frameshift_variant
86	NM_000518.4:c.75T>A	HBB:c.75T>A	NM_000518.4:c.75T>A	NP_000509.1:p.(G25=)	VUS	P/LP	Cryptic splice site; Synonymous substitution	11:5248177-5248177	synonymous_variant																									15.8
87	NM_000518.4:c.78dupT	HBB:c.78dupT	NM_000518.4:c.78dupT	NP_000509.1:p.(E27*)	P/LP	P/LP	Stop gained	11:5248173-5248173	frameshift_variant																									29.5
88	NM_000518.4:c.79G>A	HBB:c.79G>A	NM_000518.4:c.79G>A	NP_000509.1:p.(E27K)	P/LP	P/LP	Missense codons, Cryptic splice site	11:5248173-5248173	missense_variant	0.12	0.487112	0.896713		0.843	0.19	0.151566	0.999062	0.854215	0.8734		0.721	0.828	0.79069			0.584	0.7889	4.31	4.14214	0.0447214	-2.53	2.86	-3.16	27.5	1.148	1.025	0.999	0.964	14.8757	4.35665
89	NM_000518.4:c.79G>T	HBB:c.79G>T	NM_000518.4:c.79G>T	NP_000509.1:p.(E27*)	P/LP	P/LP	Stop gained	11:5248173-5248173	stop_gained		0.487112	1			0.76		0.995432					0.396	0.88746					4.31	7.14767	0.60412				42	1.148	1.025	0.999	0.964	14.8757	9.87946
90	NM_000518.4:c.79_80insT	HBB:c.79_80insT	NM_000518.4:c.79_80insT	NP_000509.1:p.(E27Vfs*18)	P/LP	P/LP	Frameshift	11:5248172-5248172	frameshift_variant																									32
91	NM_000518.4:c.82G>T	HBB:c.82G>T	NM_000518.4:c.82G>T	NP_000509.1:p.(A28S)	P/LP	P/LP	Missense codons, Cryptic splice site	11:5248170-5248170	missense_variant	0.11	0.487112	0.999604		0.6	0.02	0.209109	0.995729	0.785621	0.1999		0.641	0.828	0.85636			0.479	0.7102	1.18	2.43817	0.206555	-2.41	2.36	-1.26	23.9	1.218	1.025	1	0.977	5.9672	2.56274
92	NM_000518.4:c.85dupC	HBB:c.85dupC	NM_000518.4:c.85dupC	NP_000509.1:p.(L29Pfs*16)	P/LP	P/LP	Frameshift	11:5248166-5248166	frameshift_variant																									32
93	NM_000518.4:c.85delC	HBB:c.85delC	NM_000518.4:c.85delC	NP_000509.1:p.(L29Wfs*33)	P/LP	P/LP	Frameshift	11:5248166-5248167	frameshift_variant						0.01																			26.2
94	NM_000518.4:c.86T>G	HBB:c.86T>G	NM_000518.4:c.86T>G	NP_000509.1:p.(L29R)	P/LP	P/LP	Missense codons	11:5248166-5248166	missense_variant	0	0.487112	0.999998		1	0.01	0.997734	0.99764	0.980302	1.0934	0.884	0.978	0.949	0.98822			0.945	0.942	5.24	14.0488	0.535081	-3.67	4.605	-5.13	29.7	8.44	1.311	1	0.969	14.3909	14.147
95	NM_000518.4:c.89delG	HBB:c.89delG	NM_000518.4:c.89delG	NP_000509.1:p.(G30Afs*32)	P/LP	P/LP	Frameshift	11:5248162-5248163	frameshift_variant						0																			31
96	NM_000518.4:c.90C>T	HBB:c.90C>T	NM_000518.4:c.90C>T	NP_000509.1:p.(G30=)	P/LP	P/LP	Splice region variant; Synonymous substitution	11:5248162-5248162	splice_region_variant,synonymous_variant						0.03									0.999887	0.992									25.2							3.687	45.6481
97	NM_000518.4:c.91A>G	HBB:c.91A>G	NM_000518.4:c.91A>G	NP_000509.1:p.(R31G)	P/LP	P/LP	Splice region variant; Missense codons	11:5248161-5248161	missense_variant,splice_region_variant	0.01	0.487112	0.999999		0.999	0.41	0.998337	0.999062	0.868913	1.0673	0.814	0.963	0.82	0.96883	0.999976	0.998	0.896	0.9779	5.24	9.63157	0.536834	-5.09	4.055	-4.79	34	5.123	1.137	0.998	0.905	14.3909	10.4123	4.725	58.4994
98	NM_000518.4:c.91A>C	HBB:c.91A>C	NM_000518.4:c.91A>C	NP_000509.1:p.(R31=)	P/LP	P/LP	Splice region variant; Synonymous substitution	11:5248161-5248161	splice_region_variant,synonymous_variant						0.63									0.99992	1									23.5							2.866	35.4835
99	NM_000518.4:c.92G>A	HBB:c.92G>A	NM_000518.4:c.92G>A	NP_000509.1:p.(R31K)	P/LP	P/LP	Splice region variant; Missense codons	11:5248160-5248160	missense_variant,splice_region_variant	0.03	0.487112	0.999999		0.973	0.77	0.9041	0.99674	0.807619	1.0737	0.814	0.897	0.648	0.9815	0.999996	1	0.779	0.9774	5.24	12.7552	0.326314	-5.06	3.8	-1.92	36	6.795	1.025	0.995	0.855	17.9125	12.4847	5.97	73.9136
100	NM_000518.4:c.92G>C	HBB:c.92G>C	NM_000518.4:c.92G>C	NP_000509.1:p.(R31T)	P/LP	P/LP	Splice region variant; Missense codons	11:5248160-5248160	missense_variant,splice_region_variant	0	0.487112	1		0.999		0.962098	0.985383	0.744526	1.0456	0.863	0.942	0.806	0.98258	0.999998	1	0.935	0.982	5.24	14.6471	0.28284	-5.09		-4.41	36	6.795	1.025	0.995	0.855	17.9125	14.5916	10.304	127.572
101	NM_000518.4:c.92+1G>A	HBB:c.92+1G>A	NM_000518.4:c.92+1G>A	NP_000509.1:p.?	P/LP	P/LP	Splice donor	11:5248159-5248159	splice_donor_variant						0.98									0.999992	0.94									35							8.182	101.3
102	NM_000518.4:c.92+1G>T	HBB:c.92+1G>T	NM_000518.4:c.92+1G>T	NP_000509.1:p.?	P/LP	P/LP	Splice donor	11:5248159-5248159	splice_donor_variant						0.98									0.999992	0.94									35							8.504	105.287
103	NM_000518.4:c.92+1G>C	HBB:c.92+1G>C	NM_000518.4:c.92+1G>C	NP_000509.1:p.?	P/LP	P/LP	Splice donor	11:5248159-5248159	splice_donor_variant															0.999992	0.94									35							8.273	102.427
104	NM_000518.4:c.92+2T>G	HBB:c.92+2T>G	NM_000518.4:c.92+2T>G	NP_000509.1:p.?	P/LP	P/LP	Splice donor	11:5248158-5248158	splice_donor_variant						0.95									0.999991	0.94									35							7.647	94.6762
105	NM_000518.4:c.92+2T>C	HBB:c.92+2T>C	NM_000518.4:c.92+2T>C	NP_000509.1:p.?	P/LP	P/LP	Splice donor	11:5248158-5248158	splice_donor_variant						0.98									0.995329	0.714									33							7.754	96.001
106	NM_000518.4:c.92+2T>A	HBB:c.92+2T>A	NM_000518.4:c.92+2T>A	NP_000509.1:p.?	P/LP	P/LP	Splice donor	11:5248158-5248158	splice_donor_variant															0.999991	0.94									35							8.183	101.312
107	NM_000518.4:c.92+5G>C	HBB:c.92+5G>C	NM_000518.4:c.92+5G>C	NP_000509.1:p.?	P/LP	P/LP	Splice region variant	11:5248155-5248155	splice_region_variant,intron_variant															0.999982	0.994									23.5							9.055	112.108
108	NM_000518.4:c.92+5G>T	HBB:c.92+5G>T	NM_000518.4:c.92+5G>T	NP_000509.1:p.?	P/LP	P/LP	Splice region variant	11:5248155-5248155	splice_region_variant,intron_variant						0.76									0.999989	0.992									23.5							6.21	76.885
109	NM_000518.4:c.92+5G>A	HBB:c.92+5G>A	NM_000518.4:c.92+5G>A	NP_000509.1:p.?	P/LP	P/LP	Splice region variant	11:5248155-5248155	splice_region_variant,intron_variant						0.73									0.99994	0.974									23.4							4.253	52.6557
111	NM_000518.4:c.92+6T>C	HBB:c.92+6T>C	NM_000518.4:c.92+6T>C	NP_000509.1:p.?	P/LP	P/LP	Splice region variant	11:5248154-5248154	splice_region_variant,intron_variant						0.69									0.939704	0.808									22.3							2.554	31.6207
112	NM_000518.4:c.92+7A>T	HBB:c.92+7A>T	NM_000518.4:c.92+7A>T	NP_000509.1:p.?	P/LP	VUS	Splice region variant	11:5248153-5248153	splice_region_variant,intron_variant															0.000471428	0									14.12
113	NM_000518.4:c.93-21G>A	HBB:c.93-21G>A	NM_000518.4:c.93-21G>A	NP_000509.1:p.?	P/LP	P/LP	Cryptic splice site	11:5248050-5248050	intron_variant						0																			11.92
114	NM_000518.4:c.93-15T>G	HBB:c.93-15T>G	NM_000518.4:c.93-15T>G	NP_000509.1:p.?	P/LP	P/LP	Cryptic splice site	11:5248044-5248044	intron_variant						0																			19.95							2.82	29.6998
115	NM_000518.4:c.93-3T>G	HBB:c.93-3T>G	NM_000518.4:c.93-3T>G	NP_000509.1:p.?	P/LP	P/LP	Splice region variant	11:5248032-5248032	splice_region_variant,intron_variant						0.01									0.900743	0.656									16.01							9.058	95.3976
116	NM_000518.4:c.93-2A>C	HBB:c.93-2A>C	NM_000518.4:c.93-2A>C	NP_000509.1:p.?	P/LP	P/LP	Splice acceptor	11:5248031-5248031	splice_acceptor_variant						0.99									0.999946	0.948									33							8.042	84.6972
117	NM_000518.4:c.93-2A>G	HBB:c.93-2A>G	NM_000518.4:c.93-2A>G	NP_000509.1:p.?	P/LP	P/LP	Splice acceptor	11:5248031-5248031	splice_acceptor_variant						0.99									0.999946	0.948									33							7.955	83.7809
118	NM_000518.4:c.93-1G>C	HBB:c.93-1G>C	NM_000518.4:c.93-1G>C	NP_000509.1:p.?	P/LP	P/LP	Splice acceptor	11:5248030-5248030	splice_acceptor_variant															0.999949	0.94									33							8.064	84.9289
119	NM_000518.4:c.93-1G>A	HBB:c.93-1G>A	NM_000518.4:c.93-1G>A	NP_000509.1:p.?	P/LP	P/LP	Splice acceptor	11:5248030-5248030	splice_acceptor_variant						0.99									0.999949	0.936									34							8.75	92.1538
120	NM_000518.4:c.93G>C	HBB:c.93G>C	NM_000518.4:c.93G>C	NP_000509.1:p.(R31S)	P/LP	P/LP	Splice region variant; Missense codons	11:5248029-5248029	missense_variant,splice_region_variant	0.04	0.487112	0.999969		0.992		0.985046	0.996667	0.734027	1.0796	0.868	0.947	0.627	0.8417	0.998546	0.976	0.796	0.9749	4.18	4.84231	0.485151	-5.09	3.36	-4.23	31	1.837	1.025	0.869	0.838	13.9529	5.85408	2.578	27.1511
121	NM_000518.4:c.93-17_93-1delTATTTTCCCACCCTTAG	HBB:c.93-17_93-1delTATTTTCCCACCCTTAG	NM_000518.4:c.93-17_93-1delTATTTTCCCACCCTTAG	NP_000509.1:p.?	P/LP	P/LP	Splice region variant; Splice acceptor	11:5248029-5248046	splice_acceptor_variant,intron_variant																									23.6
124	NM_000518.5:c.93-9_105dup	NG_000007.3:g.70807_70828dup	NG_000007.3:g.70807_70828dup	NP_000509.1:p.?	P/LP	P/LP	Splice region variant	11:5248037-5248037	intron_variant
125	NM_000518.4:c.93_94insCGG	HBB:c.93_94insCGG	NM_000518.4:c.93_94insCGG	NP_000509.1:p.(R31dup)	P/LP	P/LP	Splice region variant; Inframe indels	11:5248028-5248028	inframe_insertion,splice_region_variant
126	NM_000518.4:c.94delC	HBB:c.94delC	NM_000518.4:c.94delC	NP_000509.1:p.(L32Cfs*30)	P/LP	P/LP	Splice region variant; Frameshift	11:5248027-5248028	frameshift_variant,splice_region_variant																									23.1
128	NM_000518.4:c.110del	HBB:c.110del	NM_000518.4:c.110del	NP_000509.1:p.(P37Lfs*25)	P/LP	P/LP	Frameshift	11:5248011-5248012	frameshift_variant																									33
129	NM_000518.4:c.102_104del	HBB:c.102_104del	NM_000518.4:c.102_104del	NP_000509.1:p.(V35del)	P/LP	P/LP	Inframe indels	11:5248017-5248020	inframe_deletion						0.01																			20.8
130	NM_000518.4:c.102_103delG	HBB:c.102_103delG	NM_000518.4:c.102_103delG	NP_000509.1:p.(V35Lfs*9)	P/LP	P/LP	Frameshift	11:5248018-5248020	frameshift_variant						0
131	NM_000518.4:c.101_106delTGGTCT	HBB:c.101_106delTGGTCT	NM_000518.4:c.101_106delTGGTCT	NP_000509.1:p.(V34_Y36delinsD)	P/LP	P/LP	Inframe indels	11:5248015-5248021	inframe_deletion
132	NM_000518.4:c.107A>G	HBB:c.107A>G	NM_000518.4:c.107A>G	NP_000509.1:p.(Y36C)	P/LP	P/LP	Missense codons	11:5248015-5248015	missense_variant	0.02	0.487112	1		0.952	0	0.998061	0.996372	0.935306	0.8232	0.923	0.916	0.978	0.9324			0.778	0.8104	5.1	7.82043	0.448997	-2.32	3.99	-8.15	27.7	7.47	1.137	0.987	0.99	14.1449	8.34019
133	NM_000518.4:c.108C>A	HBB:c.108C>A	NM_000518.4:c.108C>A	NP_000509.1:p.(Y36*)	P/LP	P/LP	Stop gained	11:5248014-5248014	stop_gained		0.487112	1			0		0.995598					0.836	0.91718					4.19	5.60265	0.60412				39	2.702	0.223	0.989	0.993	9.2224	7.05603
134	NM_000518.4:c.112delT	HBB:c.112delT	NM_000518.4:c.112delT	NP_000509.1:p.(W38Gfs*24)	P/LP	P/LP	Frameshift	11:5248009-5248010	frameshift_variant						0																			32
135	NM_000518.4:c.111_118delTTGGACCC	HBB:c.111_118delTTGGACCC	NM_000518.4:c.111_118delTTGGACCC	NP_000509.1:p.(W38Efs*4)	P/LP	P/LP	Frameshift	11:5248003-5248011	frameshift_variant																									33
136	NM_000518.4:c.114delG	HBB:c.114delG	NM_000518.4:c.114delG	NP_000509.1:p.(W38*)	P/LP	P/LP	Stop gained	11:5248007-5248008	frameshift_variant						0.01																			32
137	NM_000518.4:c.114G>A	HBB:c.114G>A	NM_000518.4:c.114G>A	NP_000509.1:p.(W38*)	P/LP	P/LP	Stop gained	11:5248008-5248008	stop_gained		0.487112	1			0		0.997152					0.835	0.95546					5.1	10.447	0.60412				42	7.336	1.025	1	0.998	17.6123	11.9064
138	NM_000518.4:c.113G>A	HBB:c.113G>A	NM_000518.4:c.113G>A	NP_000509.1:p.(W38*)	P/LP	P/LP	Stop gained	11:5248009-5248009	stop_gained		0.487112	1			0		0.997131					0.835	0.92433					5.1	8.99263	0.60412				43	4.546	1.025	0.998	0.997	17.6123	10.592
139	NM_000518.4:c.114_120delGACCCAG	HBB:c.114_120delGACCCAG	NM_000518.4:c.114_120delGACCCAG	NP_000509.1:p.(W38*)	P/LP	P/LP	Frameshift	11:5248001-5248008	frameshift_variant																									32
140	NM_000518.4:c.118delC	HBB:c.118delC	NM_000518.4:c.118delC	NP_000509.1:p.(Q40Rfs*22)	P/LP	P/LP	Frameshift	11:5248003-5248004	frameshift_variant						0																			32
141	NM_000518.4:c.117_118delCC	HBB:c.117_118delCC	NM_000518.4:c.117_118delCC	NP_000509.1:p.(Q40Efs*4)	P/LP	P/LP	Frameshift	11:5248003-5248005	frameshift_variant						0.01																			32
142	NM_000518.4:c.118C>T	HBB:c.118C>T	NM_000518.4:c.118C>T	NP_000509.1:p.(Q40*)	P/LP	P/LP	Stop gained	11:5248004-5248004	stop_gained		0.487112	1			0		0.997934					0.77	0.88156					4.13	11.5732	0.349014				40	3.638	1.175	1	0.999	14.3847	14.2678
143	NM_000518.4:c.123delG	HBB:c.123delG	NM_000518.4:c.123delG	NP_000509.1:p.(R41Sfs*21)	P/LP	P/LP	Frameshift	11:5247998-5247999	frameshift_variant						0																			32
144	NM_000518.4:c.123_208dup	HBB:c.123_208dup	NM_000518.4:c.123_208dup	NP_000509.1:p.(A71Sfs*20)	P/LP	P/LP	Frameshift	11:5247998-5247998	stop_gained,frameshift_variant
145	NM_000518.4:c.125dupT	HBB:c.125dupT	NM_000518.4:c.125dupT	NP_000509.1:p.(F43Lfs*2)	P/LP	P/LP	Frameshift	11:5247996-5247996	frameshift_variant																									31
146	NM_000518.4:c.126delC	HBB:c.126delC	NM_000518.4:c.126delC	NP_000509.1:p.(F43Lfs*19)	P/LP	P/LP	Frameshift	11:5247995-5247996	frameshift_variant						0																			31
147	NM_000518.4:c.126_129delCTTT	HBB:c.126_129delCTTT	NM_000518.4:c.126_129delCTTT	NP_000509.1:p.(F42Lfs*19)	P/LP	P/LP	Frameshift	11:5247992-5247996	frameshift_variant						0																			32
148	NM_000518.4:c.129dupT	HBB:c.129dupT	NM_000518.4:c.129dupT	NP_000509.1:p.(E44*)	P/LP	P/LP	Stop gained	11:5247992-5247992	frameshift_variant																									26.5
149	NM_000518.4:c.130dupG	HBB:c.130dupG	NM_000518.4:c.130dupG	NP_000509.1:p.(E44Gfs*10)	P/LP	P/LP	Frameshift	11:5247991-5247991	frameshift_variant																									26
150	NM_000518.4:c.130G>T	HBB:c.130G>T	NM_000518.4:c.130G>T	NP_000509.1:p.(E44*)	P/LP	P/LP	Stop gained	11:5247992-5247992	stop_gained		0.487112	1			0		0.99753					0.71	0.23775					4.19	3.86254	0.486378				38	-0.219	1.025	0.393	0.927	9.1336	5.67626
151	NM_000518.4:c.135delC	HBB:c.135delC	NM_000518.4:c.135delC	NP_000509.1:p.(F46Lfs*16)	P/LP	P/LP	Frameshift	11:5247986-5247987	frameshift_variant						0																			28.8
152	NM_000518.4:c.138delT	HBB:c.138delT	NM_000518.4:c.138delT	NP_000509.1:p.(F46Lfs*16)	P/LP	P/LP	Frameshift	11:5247983-5247984	frameshift_variant						0																			28.2
153	NM_000518.4:c.138dupT	HBB:c.138dupT	NM_000518.4:c.138dupT	NP_000509.1:p.(G47Wfs*7)	P/LP	P/LP	Frameshift	11:5247983-5247983	frameshift_variant																									32
154	NM_000518.4:c.138_139insA	HBB:c.38_139insA	NM_000518.4:c.38_139insA	NP_000509.1:p.(G47Rfs*7)	P/LP	P/LP	Frameshift	11:5247983-5247983	frameshift_variant																									33
155	NM_000518.4:c.143dup	HBB:c.143dup	NM_000518.4:c.143dup	NP_000509.1:p.(D48Efs*6)	P/LP	P/LP	Frameshift	11:5247978-5247978	frameshift_variant																									32
156	NM_000518.4:c.143_146dupATCT	HBB:c.143_146dupATCT	NM_000518.4:c.143_146dupATCT	NP_000509.1:p.(T51Vfs*4)	P/LP	P/LP	Frameshift	11:5247978-5247978	frameshift_variant
157	NM_000518.4:c.150delC	HBB:c.150delC	NM_000518.4:c.150delC	NP_000509.1:p.(T51Lfs*11)	P/LP	P/LP	Frameshift	11:5247971-5247972	frameshift_variant						0
158	NM_000518.4:c.153delT	HBB:c.153delT	NM_000518.4:c.153delT	NP_000509.1:p.(P52Lfs*10)	P/LP	P/LP	Frameshift	11:5247968-5247969	frameshift_variant						0																			25.2
159	NM_000518.4:c.155delC	HBB:c.155delC	NM_000518.4:c.155delC	NP_000509.1:p.(P52Lfs*10)	P/LP	P/LP	Frameshift	11:5247966-5247967	frameshift_variant						0																			25.9
160	NM_000518.4:c.162delT	HBB:c.162delT	NM_000518.4:c.162delT	NP_000509.1:p.(V55Lfs*7)	P/LP	P/LP	Frameshift	11:5247959-5247960	frameshift_variant						0																			24.3
161	NM_000518.4:c.163dupG	HBB:c.163dupG	NM_000518.4:c.163dupG	NP_000509.1:p.(V55Gfs*6)	P/LP	P/LP	Frameshift	11:5247958-5247958	frameshift_variant																									27.4
162	NM_000518.4:c.165delT	HBB:c.165delT	NM_000518.4:c.165delT	NP_000509.1:p.(M56Wfs*6)	P/LP	P/LP	Frameshift	11:5247956-5247957	frameshift_variant						0																			16.28
163	NM_000518.4:c.166dupA	HBB:c.166dupA	NM_000518.4:c.166dupA	NP_000509.1:p.(M56Nfs*5)	P/LP	P/LP	Frameshift	11:5247955-5247955	frameshift_variant																									23.9
164	NM_000518.4:c.165_177delTATGGGCAACCCT	HBB:c.165_177delTATGGGCAACCCT	NM_000518.4:c.165_177delTATGGGCAACCCT	NP_000509.1:p.(M56Rfs*2)	P/LP	P/LP	Frameshift	11:5247944-5247957	frameshift_variant																									27.7
165	NM_000518.4:c.166delA	HBB:c.166delA	NM_000518.4:c.166delA	NP_000509.1:p.(M56Wfs*6)	P/LP	P/LP	Frameshift	11:5247955-5247956	frameshift_variant						0.01																			22.5
166	NM_000518.4:c.170_171insGCAACCCTAAGGTG	HBB:c.170_171insGCAACCCTAAGGTG	NM_000518.4:c.170_171insGCAACCCTAAGGTG	NP_000509.1:p.(N58Qfs*3)	P/LP	P/LP	Frameshift	11:5247951-5247951	stop_gained,frameshift_variant
167	NM_000518.4:c.176dupC	HBB:c.176dupC	NM_000518.4:c.176dupC	NP_000509.1:p.(K60*)	P/LP	P/LP	Frameshift	11:5247945-5247945	frameshift_variant																									24.7
168	NM_000518.4:c.179delA	HBB:c.179delA	NM_000518.4:c.179delA	NP_000509.1:p.(K60Rfs*2)	P/LP	P/LP	Frameshift	11:5247942-5247943	frameshift_variant						0.36																			28
169	NM_000518.4:c.178A>T	HBB:c.178A>T	NM_000518.4:c.178A>T	NP_000509.1:p.(K60*)	P/LP	P/LP	Stop gained	11:5247944-5247944	stop_gained		0.487112	1					0.994049					0.79	0.83501					3.95	3.23529	0.60412				37	2.956	1.137	0.377	0.695	11.232	4.51613
170	NM_000518.4:c.182T>A	HBB:c.182T>A	NM_000518.4:c.182T>A	NP_000509.1:p.(V61E)	P/LP	P/LP	Missense codons	11:5247940-5247940	missense_variant	0	0.487112	1		1		0.997656	0.989614	0.965703	1.0781	0.874	0.974	0.911	0.96796			0.945	0.9274	5.1	11.6887	0.519315	-3.38	4.53	-5.73	27.4	8.664	1.311	0.721	0.741	14.1449	12.5144
171	NM_000518.4:c.189_195delTCATGGC	HBB:c.189_195delTCATGGC	NM_000518.4:c.189_195delTCATGGC	NP_000509.1:p.(H64Rfs*24)	P/LP	P/LP	Frameshift	11:5247926-5247933	frameshift_variant																									32
172	NM_000518.4:c.184A>T	HBB:c.184A>T	NM_000518.4:c.184A>T	NP_000509.1:p.(K62*)	P/LP	P/LP	Stop gained	11:5247938-5247938	stop_gained		0.487112	1					0.994801					0.737	0.29572					2.68	2.85509	0.60412				39	0.406	1.137	0.869	0.756	11.3403	4.03632
173	NM_000518.4:c.194delG	HBB:c.194delG	NM_000518.4:c.194delG	NP_000509.1:p.(G65Afs*25)	P/LP	P/LP	Frameshift	11:5247927-5247928	frameshift_variant						0.01																			32
174	NM_000518.4:c.199A>T	HBB:c.199A>T	NM_000518.4:c.199A>T	NP_000509.1:p.(K67*)	P/LP	P/LP	Stop gained	11:5247923-5247923	stop_gained		0.487112	1					0.995742					0.855	0.94756					5.1	6.33092	0.60412				41	4.53	1.137	0.988	0.718	14.1449	7.89042
175	NM_000518.4:c.203_204delGT	HBB:c.203_204delGT	NM_000518.4:c.203_204delGT	NP_000509.1:p.(V68Afs*5)	P/LP	P/LP	Frameshift	11:5247917-5247919	frameshift_variant						0.01																			32
176	NM_000518.4:c.216dupT	HBB:c.216dupT	NM_000518.4:c.216dupT	NP_000509.1:p.(S73*)	P/LP	P/LP	Stop gained	11:5247905-5247905	frameshift_variant																									22
177	NM_000518.4:c.217dupA	HBB:c.217dupA	NM_000518.4:c.217dupA	NP_000509.1:p.(S73Kfs*2)	P/LP	P/LP	Frameshift	11:5247904-5247904	frameshift_variant																									23.4
178	NM_000518.4:c.217_221delAGTGAinsT	HBB: c.217_221delAGTGAinsT	NM_000518.4: c.217_221delAGTGAinsT	NP_000509.1:p.(S73Lfs*16)	P/LP	P/LP	Frameshift	11:5247900-5247905	frameshift_variant						0.01																			23.7
179	NM_000518.4:c.225delC	HBB:c.225delC	NM_000518.4:c.225delC	NP_000509.1:p.(L76Wfs*14)	P/LP	P/LP	Frameshift	11:5247896-5247897	frameshift_variant						0
179	NM_000518.4:c.226delC	HBB:c.226delC	NM_000518.4:c.226delC	NP_000509.1:p.(L76Wfs*14)	P/LP	P/LP	Frameshift	11:5247895-5247896	frameshift_variant						0																			19.94
180	NM_000518.4:c.229_230delGC	HBB:c.229_230delGC	NM_000518.4:c.229_230delGC	NP_000509.1:p.(A77Sfs*14)	P/LP	P/LP	Frameshift	11:5247891-5247893	frameshift_variant						0																			16.44
181	NM_000518.4:c.230delC	HBB:c.230delC	NM_000518.4:c.230delC	NP_000509.1:p.(A77Vfs*13)	P/LP	P/LP	Frameshift	11:5247891-5247892	frameshift_variant						0																			15.93
182	NM_000518.4:c.235del	HBB:c.235del	NM_000518.4:c.235del	NP_000509.1:p.(Leu79TrpfsTer11)	P/LP	P/LP	Frameshift	11:5247886-5247887	frameshift_variant						0																			24.1
183	NM_000518.4:c.244delC	HBB:c.244delC	NM_000518.4:c.244delC	NP_000509.1:p.(L82Sfs*8)	P/LP	P/LP	Frameshift	11:5247877-5247878	frameshift_variant						0																			32
184	NM_000518.4:c.244_265del22	HBB:c.244_265del22	NM_000518.4:c.244_265del22	NP_000509.1:p.(L82Sfs*8)	P/LP	P/LP	Frameshift	11:5247856-5247878	frameshift_variant
185	NM_000518.4:c.251delG	HBB:c.251delG	NM_000518.4:c.251delG	NP_000509.1:p.(G84Afs*6)	P/LP	P/LP	Frameshift	11:5247870-5247871	frameshift_variant						0																			25.7
186	NM_000518.4:c.253_260del	HBB:c.253_260del	NM_000518.4:c.253_260del	NP_000509.1:p.(T85Hfs*4)	P/LP	P/LP	Frameshift	11:5247861-5247869	frameshift_variant																									32
187	NM_000518.4:c.255dupC	HBB:c.255dupC	NM_000518.4:c.255dupC	NP_000509.1:p.(F86Lfs*6)	P/LP	P/LP	Frameshift	11:5247866-5247866	frameshift_variant
188	NM_000518.4:c.258dupT	HBB:c.258dupT	NM_000518.4:c.258dupT	NP_000509.1:p.(A87Cfs*5)	P/LP	P/LP	Frameshift	11:5247863-5247863	frameshift_variant
189	NM_000518.4:c.266dupT	HBB:c.266dupT	NM_000518.4:c.266dupT	NP_000509.1:p.(S90Efs*2)	P/LP	P/LP	Frameshift	11:5247855-5247855	frameshift_variant																									31
190	NM_000518.4:c.266_267del	HBB:c.266_267del	NM_000518.4:c.266_267del	NP_000509.1:p.(L89Qfs*2)	P/LP	P/LP	Frameshift	11:5247854-5247856	frameshift_variant						0																			31
191	NM_000518.4:c.270_271del	HBB:c.270_271del	NM_000518.4:c.270_271del	NP_000509.1:p.(S90Rfs*5)	P/LP	P/LP	Frameshift	11:5247850-5247852	frameshift_variant						0																			32
192	NM_000518.4:c.271G>T	HBB:c.271G>T	NM_000518.4:c.271G>T	NP_000509.1:p.(E91*)	P/LP	P/LP	Stop gained	11:5247851-5247851	stop_gained		0.487112	1			0.01		0.997331					0.841	0.70287					5.24	7.24194	0.60412				41	0.993	1.025	0.987	0.938	11.354	10.1734
193	NM_000518.4:c.275del	HBB:c.275del	NM_000518.4:c.275del	NP_000509.1:p.(L92Rfs*67)	P/LP	P/LP	Frameshift	11:5247846-5247847	frameshift_variant						0																			32
194	NM_000518.4:c.275dupT	HBB:c.275dupT	NM_000518.4:c.275dupT	NP_000509.1:p.(H93Afs*3)	P/LP	P/LP	Frameshift	11:5247846-5247846	frameshift_variant
195	NM_000518.4:c.282_283dupTG	HBB:c.282_283dupTG	NM_000518.4:c.282_283dupTG	NP_000509.1:p.(D95Vfs*65)	P/LP	P/LP	Frameshift	11:5247839-5247839	frameshift_variant
196	NM_000518.4:c.287dupA	HBB:c.287dupA	NM_000518.4:c.287dupA	NP_000509.1:p.(L97Afs*6)	P/LP	P/LP	Frameshift	11:5247834-5247834	frameshift_variant																									32
198	NM_000518.4:c.301_302delCCinsTCTGAGAACTT	HBB:c.301_302delCCinsTCTGAGAACTT	NM_000518.4:c.301_302delCCinsTCTGAGAACTT	NP_000509.1:p.(P101delinsSENF)	P/LP	P/LP	Inframe indels	11:5247819-5247821	protein_altering_variant
199	NM_000518.4:c.315delG	HBB:c.315delG	NM_000518.4:c.315delG	NP_000509.1:p.(R105Sfs*54)	P/LP	P/LP	Splice region variant; Frameshift	11:5247806-5247807	frameshift_variant,splice_region_variant						0
200	NM_000518.4:c.315+1G>A	HBB:c.315+1G>A	NM_000518.4:c.315+1G>A	NP_000509.1:p.?	P/LP	P/LP	Splice donor	11:5247806-5247806	splice_donor_variant						1									0.999956	0.948									33							8.182	88.4254
201	NM_000518.4:c.315+1G>C	HBB:c.315+1G>C	NM_000518.4:c.315+1G>C	NP_000509.1:p.?	P/LP	P/LP	Splice donor	11:5247806-5247806	splice_donor_variant															0.999956	0.926									33							8.273	89.4088
202	NM_000518.4:c.315+1G>T	HBB:c.315+1G>T	NM_000518.4:c.315+1G>T	NP_000509.1:p.?	P/LP	P/LP	Splice donor	11:5247806-5247806	splice_donor_variant						1									0.999956	0.948									35							8.504	91.9053
203	NM_000518.4:c.315+2T>C	HBB:c.315+2T>C	NM_000518.4:c.315+2T>C	NP_000509.1:p.?	P/LP	P/LP	Splice donor	11:5247805-5247805	splice_donor_variant						1									0.999786	0.906									32							7.754	83.7998
204	NM_000518.4:c.315+2T>A	HBB:c.315+2T>A	NM_000518.4:c.315+2T>A	NP_000509.1:p.?	P/LP	VUS	Splice donor	11:5247805-5247805	splice_donor_variant															0.999946	0.944									33							8.183	88.4362
205	NM_000518.4:c.315+2del	HBB:c.315+2del	NM_000518.4:c.315+2del	NP_000509.1:p.?	P/LP	P/LP	Splice donor	11:5247804-5247805	splice_donor_variant						1																			32
206	NM_000518.4:c.315+2_315+3delinsACGTTCTCTGA	HBB:c.315+2_315+3delinsACGTTCTCTGA	NM_000518.4:c.315+2_315+3delinsACGTTCTCTGA	NP_000509.1:p.?	P/LP	P/LP	Splice region variant; Splice donor	11:5247803-5247805	splice_donor_variant,intron_variant																									23.1
207	NM_000518.4:c.315+4_315+5del	NG_000007.3:g.71043_71044delAG	NG_000007.3:g.71043_71044delAG	NP_000509.1:p.?	P/LP	P/LP	Splice region variant	11:5247801-5247803	splice_region_variant,intron_variant						0.37																			21.2
208	NM_000518.4:c.315+5G>C	HBB:c.315+5G>C	NM_000518.4:c.315+5G>C	NP_000509.1:p.?	VUS	P/LP	Splice region variant	11:5247802-5247802	splice_region_variant,intron_variant															0.999975	0.95									21.1							6.49	70.1394
210	NM_000518.4:c.316-238C>T	HBB:c.316-238C>T	NM_000518.4:c.316-238C>T	NP_000509.1:p.?	P/LP	B/LB		11:5247194-5247194	intron_variant						0																			1.848
211	NM_000518.4:c.316-197C>T	HBB:c.316-197C>T	NM_000518.4:c.316-197C>T	NP_000509.1:p.?	P/LP	P/LP	Cryptic splice site	11:5247153-5247153	intron_variant						0																			0.453
212	NM_000518.4:c.316-146T>G	HBB:c.316-146T>G	NM_000518.4:c.316-146T>G	NP_000509.1:p.?	P/LP	P/LP	Cryptic splice site	11:5247102-5247102	intron_variant						0																			3.251
213	NM_000518.4:c.316-125A>G	HBB:c.316-125A>G	NM_000518.4:c.316-125A>G	NP_000509.1:p.?	P/LP	P/LP		11:5247081-5247081	intron_variant						0																			4.918
214	NM_000518.4:c.316-106C>G	HBB:c.316-106C>G	NM_000518.4:c.316-106C>G	NP_000509.1:p.?	VUS	P/LP	Cryptic splice site	11:5247062-5247062	intron_variant																									0.389
215	NM_000518.4:c.316-90A>G	HBB:c.316-90A>G	NM_000518.4:c.316-90A>G	NP_000509.1:p.?	VUS	P/LP		11:5247046-5247046	intron_variant						0																			2.498
216	NM_000518.4:c.316-36C>T	HBB:c.316-36C>T	NM_000518.4:c.316-36C>T	NP_000509.1:p.?	VUS	VUS		11:5246992-5246992	intron_variant						0																			1.183
217	NM_000518.4:c.316-14T>G	HBB:c.316-14T>G	NM_000518.4:c.316-14T>G	NP_000509.1:p.?	P/LP	P/LP	Splice region variant	11:5246970-5246970	intron_variant						0.02																			7.001							2.676	23.4203
218	NM_000518.4:c.316-8T>G	HBB:c.316-8T>G	NM_000518.4:c.316-8T>G	NP_000509.1:p.?	VUS	P/LP	Splice region variant	11:5246964-5246964	splice_region_variant,intron_variant						0									5.42497e-05	0.012									6.601							0.516	4.51602
219	NM_000518.4:c.316-7C>A	HBB:c.316-7C>A	NM_000518.4:c.316-7C>A	NP_000509.1:p.?	VUS	P/LP	Splice region variant	11:5246963-5246963	splice_region_variant,intron_variant						0									0.00143921	0.122									13.25							2.888	25.2757
220	NM_000518.4:c.316-7C>G	HBB:c.316-7C>G	NM_000518.4:c.316-7C>G	NP_000509.1:p.?	P/LP	P/LP	Splice region variant	11:5246963-5246963	splice_region_variant,intron_variant															0.00190598	0.11									13.08							2.638	23.0877
221	NM_000518.4:c.316-3C>A	HBB:c.316-3C>A	NM_000518.4:c.316-3C>A	NP_000509.1:p.?	P/LP	P/LP	Splice region variant	11:5246959-5246959	splice_region_variant,intron_variant						0.05									0.999445	0.972									23.4							3.573	31.2708
222	NM_000518.4:c.316-3C>G	HBB:c.316-3C>G	NM_000518.4:c.316-3C>G	NP_000509.1:p.?	P/LP	P/LP	Splice region variant	11:5246959-5246959	splice_region_variant,intron_variant															0.999966	0.986									32							14.436	126.343
223	NM_000518.4:c.316-2A>G	HBB:c.316-2A>G	NM_000518.4:c.316-2A>G	NP_000509.1:p.?	P/LP	P/LP	Splice acceptor	11:5246958-5246958	splice_acceptor_variant						0.98									0.999988	0.926									34							7.955	69.6219
224	NM_000518.4:c.316-2A>C	HBB:c.316-2A>C	NM_000518.4:c.316-2A>C	NP_000509.1:p.?	P/LP	P/LP	Splice acceptor	11:5246958-5246958	splice_acceptor_variant						0.98									0.999988	0.926									34							8.042	70.3833
225	NM_000518.4:c.316-1G>C	HBB:c.316-1G>C	NM_000518.4:c.316-1G>C	NP_000509.1:p.?	P/LP	P/LP	Splice acceptor	11:5246957-5246957	splice_acceptor_variant															0.999987	0.924									34							8.064	70.5759
226	NM_000518.4:c.316-1G>A	HBB:c.316-1G>A	NM_000518.4:c.316-1G>A	NP_000509.1:p.?	P/LP	P/LP	Splice acceptor	11:5246957-5246957	splice_acceptor_variant						0.98									0.999987	0.926									34							8.75	76.5797
227	NM_000518.4:c.316-1G>T	HBB:c.316-1G>T	NM_000518.4:c.316-1G>T	NP_000509.1:p.?	P/LP	P/LP	Splice acceptor	11:5246957-5246957	splice_acceptor_variant						0.98									0.999987	0.926									34							8.598	75.2494
228	NM_000518.4:c.316-1delG	HBB:c.316-1delG	NM_000518.4:c.316-1delG	NP_000509.1:p.?	P/LP	P/LP	Splice acceptor	11:5246956-5246957	splice_acceptor_variant						0.98																			33
229	NM_000518.4:c.319C>G	HBB:c.319C>G	NM_000518.4:c.319C>G	NP_000509.1:p.(L107V)	P/LP	P/LP	Missense codons	11:5246953-5246953	missense_variant	0	0.487112	1		0.819		0.994932	0.998586	0.973503	1.0701	0.88	0.952	0.907	0.9878			0.754	0.9298	4.68	10.8958	0.53234	-3.81	4.565	-2.49	26.6	8.991	1.175	1	0.987	15.4745	11.1283
230	NM_000518.4:c.320T>G	HBB:c.320T>G	NM_000518.4:c.320T>G	NP_000509.1:p.(L107R)	P/LP	P/LP	Missense codons	11:5246952-5246952	missense_variant	0	0.487112	1		0.98	0	0.993262	0.997493	0.864713	1.0902	0.882	0.987	0.994	0.98661			0.869	0.952	4.68	10.2098	0.547952	-3.99	4.565	-4.81	29.3	8.381	1.311	1	0.988	12.399	11.3191
231	NM_000518.4:c.323dupG	HBB:c.323dupG	NM_000518.4:c.323dupG	NP_000509.1:p.(N109Qfs*32)	P/LP	P/LP	Frameshift	11:5246948-5246948	frameshift_variant																									33
232	NM_000518.4:c.326_337delACGTGCTGGTCT	HBB:c.326_337delACGTGCTGGTCT	NM_000518.4:c.326_337delACGTGCTGGTCT	NP_000509.1:p.(N109_C113delinsS)	P/LP	P/LP	Inframe indels	11:5246934-5246946	inframe_deletion																									21.7
233	NM_000518.4:c.328delG	HBB:c.328delG	NM_000518.4:c.328delG	NP_000509.1:p.(V110Cfs*49)	P/LP	P/LP	Frameshift	11:5246943-5246944	frameshift_variant						0.02																			28.4
234	NM_000518.4:c.332T>C	HBB:c.332T>C	NM_000518.4:c.332T>C	NP_000509.1:p.(L111P)	P/LP	P/LP	Missense codons	11:5246940-5246940	missense_variant	0	0.487112	1		0.998	0.01	0.997594	0.998828	0.454955	1.1233	0.668	0.871	0.915	0.91831			0.919	0.9317	4.68	5.49767	0.511625	-3.69	4.135	-5.28	28.6	6.623	1.311	0.491	0.944	12.399	6.54034
235	NM_000518.4:c.339T>A	HBB:c.339T>A	NM_000518.4:c.339T>A	NP_000509.1:p.(C113*)	P/LP	P/LP	Stop gained	11:5246933-5246933	stop_gained		0.487112	1					0.991023					0.508	0.54037					4.68	3.17722	0.60412				40	0.201	0.321	0.448	0.865	12.399	4.62693
236	NM_000518.4:c.340delG	HBB:c.340delG	NM_000518.4:c.340delG	NP_000509.1:p.(V114Cfs*45)	P/LP	P/LP	Frameshift	11:5246931-5246932	frameshift_variant						0.02																			32
237	NM_000518.4:c.344T>C	HBB:c.344T>C	NM_000518.4:c.344T>C	NP_000509.1:p.(L115P)	P/LP	P/LP	Missense codons	11:5246928-5246928	missense_variant	0	0.500041	1		0.981	0	0.976734	0.998683	0.889911	1.088	0.706	0.908	0.94	0.95382			0.87	0.9499	4.68	6.37402	0.531186	-4.04	4.35	-5.26	25.2	8.381	1.311	0.707	0.869	12.399	7.84275
238	NM_000518.4:c.343_344delinsG	HBB:c.343_344delinsG	NM_000518.4:c.343_344delinsG	NP_000509.1:p.(L115Gfs*44)	P/LP	P/LP	Frameshift	11:5246927-5246929	frameshift_variant						0																			25.5
239	NM_000518.4:c.347C>A	HBB:c.347C>A	NM_000518.4:c.347C>A	NP_000509.1:p.(A116D)	P/LP	P/LP	Missense codons	11:5246925-5246925	missense_variant	0	0.500041	0.999953		0.725	0	0.95631	0.995319	0.719228	1.0176	0.677	0.871	0.937	0.96983			0.708	0.9081	3.75	4.01876	0.476609	-3.49	4.495	-4.03	23.6	5.947	0.168	0.521	0.768	12.5203	5.17033
240	NM_000518.4:c.349_350insTGAT	HBB:c.349_350insTGAT	NM_000518.4:c.349_350insTGAT	NP_000509.1:p.(H117Lfs*25)	P/LP	P/LP	Frameshift	11:5246922-5246922	frameshift_variant																									23
241	NM_000518.4:c.357delT	HBB:c.357delT	NM_000518.4:c.357delT	NP_000509.1:p.(F119Lfs*40)	P/LP	P/LP	Frameshift	11:5246914-5246915	frameshift_variant						0.02																			19.88
242	NM_000518.4:c.363delA	HBB:c.363delA	NM_000518.4:c.363delA	NP_000509.1:p.(E122Nfs*37)	P/LP	P/LP	Frameshift	11:5246908-5246909	frameshift_variant						0.02																			16.71
243	NM_000518.4:c.363dupA	HBB:c.363dupA	NM_000518.4:c.363dupA	NP_000509.1:p.(E122Rfs*19)	P/LP	P/LP	Frameshift	11:5246908-5246908	frameshift_variant																									25.3
244	NM_000518.4:c.364G>T	HBB:c.364G>T	NM_000518.4:c.364G>T	NP_000509.1:p.(E122*)	P/LP	P/LP	Stop gained	11:5246908-5246908	stop_gained		0.500041	1			0.04		0.989425					0.464	0.91834					4.68	5.09844	0.60412				39	4.942	1.025	0.019	0.06	15.4745	7.99832
245	NM_000518.4:c.370delA	HBB:c.370delA	NM_000518.4:c.370delA	NP_000509.1:p.(T124Pfs*35)	P/LP	P/LP	Frameshift	11:5246901-5246902	frameshift_variant						0																			24.5
246	NM_000518.4:c.371_378del	HBB:c.371_378del	NM_000518.4:c.371_378del	NP_000509.1:p.(T124Sfs*14)	P/LP	P/LP	Frameshift	11:5246893-5246901	frameshift_variant																									25.9
247	NM_000518.4:c.375delA	HBB:c.375delA	NM_000518.4:c.375delA	NP_000509.1:p.(P126Qfs*33)	P/LP	P/LP	Frameshift	11:5246896-5246897	frameshift_variant						0																			9.941
248	NM_000518.4:c.376_378dupCCA	HBB:c.376_378dupCCA	NM_000518.4:c.376_378dupCCA	NP_000509.1:p.(P126dup)	P/LP	P/LP	Inframe indels	11:5246895-5246895	inframe_insertion
249	NM_000518.4:c.378delA	HBB:c.378delA	NM_000518.4:c.378delA	NP_000509.1:p.(V127Cfs*32)	P/LP	P/LP	Frameshift	11:5246893-5246894	frameshift_variant						0																			18.13
250	NM_000518.4:c.380delT	HBB:c.380delT	NM_000518.4:c.380delT	NP_000509.1:p.(V127Gfs*32)	P/LP	P/LP	Frameshift	11:5246891-5246892	frameshift_variant						0																			23.4
252	NM_000518.4:c.396delTGCAGGCTGCTATCAG	HBB:c.396delTGCAGGCTGCTATCAG	NM_000518.4:c.396delTGCAGGCTGCTATCAG	NP_000509.1:p.(V134Wfs*25)	P/LP	P/LP	Frameshift	11:5246875-5246876	frameshift_variant						0
253	NM_000518.4:c.383A>C	HBB:c.383A>C	NM_000518.4:c.383A>C	NP_000509.1:p.(Q128P)	P/LP	P/LP	Missense codons	11:5246889-5246889	missense_variant	0	0.500041	1		0.987	0	0.993781	0.994101	0.974702	1.0393	0.757	0.938	0.793	0.98294			0.881	0.913	4.68	7.61111	0.508751	-3.38	4.19	-3.99	25.5	7.211	1.137	0.389	0.654	12.3991	8.9374
254	NM_000518.4:c.383A>G	HBB:c.383A>G	NM_000518.4:c.383A>G	NP_000509.1:p.(Q128R)	P/LP	P/LP	Missense codons	11:5246889-5246889	missense_variant	0.01	0.500041	1		0.345	0	0.959077	0.99521	0.844516	0.8903	0.747	0.879	0.935	0.98221			0.515	0.8413	4.68	5.59001	0.482139	-3.34	4.19	-2.66	23.5	7.211	1.137	0.389	0.654	12.3991	5.90434
255	NM_000518.4:c.382C>T	HBB:c.382C>T	NM_000518.4:c.382C>T	NP_000509.1:p.(Q128*)	P/LP	P/LP	Stop gained	11:5246890-5246890	stop_gained		0.500041	1			0		0.99617					0.744	0.98683					4.68	14.4317	0.546432				44	9.011	1.175	0.305	0.565	15.4745	17.6136
256	NM_000518.4:c.383_385delAGG	HBB:c.383_385delAGG	NM_000518.4:c.383_385delAGG	NP_000509.1:p.(Q128_A129delinsP)	P/LP	P/LP	Inframe indels	11:5246886-5246889	inframe_deletion						0																			21.1
258	NM_000518.4:c.394C>T	HBB:c.394C>T	NM_000518.4:c.394C>T	NP_000509.1:p.(Q132*)	VUS	P/LP	Stop gained	11:5246878-5246878	stop_gained		0.500041	1			0		0.99473					0.725	0.94676					4.68	10.9916	0.60412				44	3.688	1.175	0.86	0.992	11.1978	14.0013
259	NM_000518.4:c.396_397insGCCT	HBB:c.396_397insGCCT	NM_000518.4:c.396_397insGCCT	NP_000509.1:p.(K133Afs*2)	P/LP	P/LP	Frameshift	11:5246875-5246875	frameshift_variant
260	NM_000518.4:c.396_397delGA	HBB:c.396_397delGA	NM_000518.4:c.396_397delGA	NP_000509.1:p.(K133Sfs*7)	P/LP	P/LP	Frameshift	11:5246874-5246876	frameshift_variant						0
261	NM_000518.4:c.396_397del	HBB:c.396_397del	NM_000518.4:c.396_397del	NP_000509.1:p.(K133Sfs*7)	P/LP	P/LP	Frameshift	11:5246874-5246876	frameshift_variant						0
262	NM_000518.4:c.397A>T	HBB:c.397A>T	NM_000518.4:c.397A>T	NP_000509.1:p.(K133*)	P/LP	P/LP	Stop gained	11:5246875-5246875	stop_gained		0.500041	1					0.995724					0.759	0.98273					4.68	7.76731	0.60412				47	7.211	1.137	0.987	0.996	12.3991	9.6019
263	NM_000518.4:c.404_413delinsGCAG	HBB:c.404_413delinsGCAG	NM_000518.4:c.404_413delinsGCAG	NP_000509.1:p.(V135_V138delinsGR)	P/LP	P/LP	Inframe indels	11:5246858-5246868	protein_altering_variant																									33
264	NM_000518.4:c.413_418delTGGCTA	HBB:c.413_418delTGGCTA	NM_000518.4:c.413_418delTGGCTA	NP_000509.1:p.(V138_N140delinsD)	P/LP	P/LP	Inframe indels	11:5246853-5246859	inframe_deletion																									21.8
265	NM_000518.4:c.424delC	HBB:c.424delC	NM_000518.4:c.424delC	NP_000509.1:p.(L142Wfs*17)	VUS	P/LP	Frameshift	11:5246847-5246848	frameshift_variant						0																			33
267	NM_000518.4:c.*6C>G	HBB:c.*6C>G	NM_000518.4:c.*6C>G	NP_000509.1:p.?	VUS	P/LP	Other 3'UTR site	11:5246822-5246822	3_prime_UTR_variant																									6.315
268	NM_000518.4:c.*47C>G	HBB:c.*47C>G	NM_000518.4:c.*47C>G	NP_000509.1:p.?	P/LP	VUS	Other 3'UTR site	11:5246781-5246781	3_prime_UTR_variant																									2.472
269	NM_000518.4:c.*93_*105delATCTGGATTCTGC	HBB:c.*93_*105delATCTGGATTCTGC	NM_000518.4:c.*93_*105delATCTGGATTCTGC	NP_000509.1:p.?	VUS	P/LP	Other 3'UTR site	11:5246722-5246735	3_prime_UTR_variant
270	NM_000518.4:c.*108A>C	HBB:c.*108A>C	NM_000518.4:c.*108A>C	NP_000509.1:p.?	P/LP	VUS	RNA cleavage - Poly(A) signal	11:5246720-5246720	3_prime_UTR_variant						0																			15.14
271	NM_000518.4:c.*108A>G	HBB:c.*108A>G	NM_000518.4:c.*108A>G	NP_000509.1:p.?	VUS	P/LP	RNA cleavage - Poly(A) signal	11:5246720-5246720	3_prime_UTR_variant						0																			15.27
272	NM_000518.4:c.*110T>C	HBB:c.*110T>C	NM_000518.4:c.*110T>C	NP_000509.1:p.?	VUS	VUS	RNA cleavage - Poly(A) signal	11:5246718-5246718	3_prime_UTR_variant						0																			14.17
273	NM_000518.4:c.*110T>A	HBB:c.*110T>A	NM_000518.4:c.*110T>A	NP_000509.1:p.?	VUS	VUS	RNA cleavage - Poly(A) signal	11:5246718-5246718	3_prime_UTR_variant																									14.07
274	NM_000518.4:c.*111A>G	HBB:c.*111A>G	NM_000518.4:c.*111A>G	NP_000509.1:p.?	VUS	P/LP	RNA cleavage - Poly(A) signal	11:5246717-5246717	3_prime_UTR_variant						0																			14.04
275	NM_000518.4:c.*112A>G	HBB:c.*112A>G	NM_000518.4:c.*112A>G	NP_000509.1:p.?	VUS	P/LP	RNA cleavage - Poly(A) signal	11:5246716-5246716	3_prime_UTR_variant						0																			14.73
276	NM_000518.4:c.*113A>G	HBB:c.*113A>G	NM_000518.4:c.*113A>G	NP_000509.1:p.?	P/LP	P/LP	RNA cleavage - Poly(A) signal	11:5246715-5246715	3_prime_UTR_variant						0																			13.23
277	NM_000518.4:c.*110_*111delTA	HBB:c.*110_*111delTA	NM_000518.4:c.*110_*111delTA	NP_000509.1:p.?	P/LP	P/LP	RNA cleavage - Poly(A) signal	11:5246716-5246718	3_prime_UTR_variant						0
278	NM_000518.4:c.*110_*114del	HBB:c.*110_*114del	NM_000518.4:c.*110_*114del	NP_000509.1:p.?	P/LP	P/LP	RNA cleavage - Poly(A) signal	11:5246713-5246718	3_prime_UTR_variant																									14.11
280	NM_000518.4:c.93-22_95del	HBB:c.93-22_95del	NM_000518.4:c.93-22_95del	NP_000509.1:p.?	P/LP	P/LP	Splice region variant; Splice acceptor; Inframe indels	11:5248026-5248051	splice_acceptor_variant,coding_sequence_variant,intron_variant																									24.7
340	NM_000558.5:c.-16T>C	HBA1:c.-16T>C	NM_000558.5:c.-16T>C	NP_000549.1:p.?	P/LP	VUS	5'UTR	16:226700-226700	5_prime_UTR_variant						0																			11.66
341	NM_000558.5:c.1A>G	HBA1:c.1A>G	NM_000558.5:c.1A>G	NP_000549.1:p.(M1?)	P/LP	P/LP	Initiation codon	16:226716-226716	start_lost	0.01	0.516011	1	4e-06	0.997	0.02	0.92579	0.989231	0.9	0.8111	1	0.881	0.977	0.94592			0.872	0.8201	4.45	3.34001	0.2563	-3.04		-2.38	23.2	5.116	1.168	0.908	0.17	13.1948	3.39206
342	NM_000517.4:c.2T>C	HBA2:c.2T>C	NM_000517.4:c.2T>C	NP_000508.1:p.(M1?)	P/LP	P/LP	Initiation codon	16:222913-222913	start_lost	0	0.516011	1	4e-06	0.999	0.01	0.994211	0.976718		0.7453	0.996	0.872	0.857	0.84577			0.935	0.8359	2.57	3.25909	0.60412	-3.14		-3.57	22.8	2.033	1.099	0.99	0.821	8.158	3.8269
343	NM_000517.4:c.2delT	HBA2:c.2delT	NM_000517.4:c.2delT	NP_000508.1:p.(M1?)	P/LP	P/LP	Initiation codon	16:222912-222913	frameshift_variant,start_lost						0.02																			17.12
344	NM_000517.4:c.1delA	HBA2:c.1delA	NM_000517.4:c.1delA	NP_000508.1:p.(M1?)	P/LP	P/LP	Initiation codon	16:222911-222912	frameshift_variant,start_lost						0																			17.56
347	NM_000558.5:c.43T>C	HBA1:c.43T>C	NM_000558.5:c.43T>C	NP_000549.1:p.(W15R)	P/LP	P/LP	Missense codons	16:226758-226758	missense_variant	0	0.623552	0.999921	6.4e-05	0.99	0	0.982863	0.972776	0.677732	0.9766	0.3	0.705	0.782	0.99167			0.886	0.8891	4.45	2.44842	0.221982	-3.85		-12.66	24.4	6.864	1.016	0.021	0.005	13.1948	2.78015
349	NM_000558.5:c.44G>A	HBA1:c.44A>G	NM_000558.5:c.44A>G	NP_000549.1:p.(W15*)	P/LP	P/LP	Stop gained	16:226759-226759	stop_gained		0.623552	1	6.4e-05		0.15		0.994061					0.681	0.97291					4.45	3.16713	0.430315				34	3.195	1.048	0.024	0.005	10.6213	4.59617
350	NM_000517.4:c.56delG	HBA2:c.56delG	NM_000517.4:c.56delG	NP_000508.1:p.(G19Afs*31)	P/LP	P/LP	Frameshift	16:222966-222967	frameshift_variant						0.13
351	NM_000517.4:c.64G>T	HBA2:c.64G>T	NM_000517.4:c.64G>T	NP_000508.1:p.(A22S)	P/LP	P/LP	Missense codons	16:222975-222975	missense_variant	0.26	0.516011	1	0.02224	0.066	0.06	0.147982	0.960959		-0.1483	0.511	0.344	0.115	0.16978			0.038	0.6366	2.96	0.807622	0.0750119	-3.18	1.66	-1.03	12.57	0.55	1.133	0.001	0.008	6.3289	0.765936
352	NM_000517.4:c.69C>T	HBA2:c.69C>T	NM_000517.4:c.69C>T	NP_000508.1:p.(G23=)	P/LP	P/LP	Cryptic splice site, Synonymous substitution	16:222980-222980	synonymous_variant						0.98																			15.59
353	NM_000517.4:c.69delC	HBA2:c.69delC	NM_000517.4:c.69delC	NP_000508.1:p.(E24Sfs*26)	P/LP	P/LP	Frameshift	16:222979-222980	frameshift_variant						0.11																			12.81
354	NM_000517.4:c.70G>T	HBA2:c.70G>T	NM_000517.4:c.70G>T	NP_000508.1:p.(E24*)	P/LP	P/LP	Stop gained	16:222981-222981	stop_gained		0.516011	1	0.081751		0.16		0.981058					0.489	0.41141					2.98	1.69484	0.60412				33	2.32	0.215	0.001	0.026	7.4156	2.97766
355	NM_000517.4:c.79G>A	HBA2:c.79G>A	NM_000517.4:c.79G>A	NP_000508.1:p.(A27T)	P/LP	P/LP	Missense codons	16:222990-222990	missense_variant	0.65	0.516011	1	0.003439	0.137	0.46	0.210085	0.994485		0.043	0.92	0.591	0.715	0.12741			0.014	0.7048	2.98	0.892168	0.252173	-3.21	1.485	-1.01	15.3	0.864	0.215	0.005	0.424	10.5668	0.912702
356	NM_000517.4:c.89T>C	HBA2:c.89T>C	NM_000517.4:c.89T>C	NP_000508.1:p.(L30P)	P/LP	P/LP	Missense codons	16:223000-223000	missense_variant	0	0.516011	1	3.2e-05	1	0.03	0.998588	0.998017		1.0006	0.939	0.91	0.928	0.91824			0.945	0.93	3.94	5.38066	0.503392	-3.67	4.665	-6.55	25.7	2.949	1.098	0.991	0.984	7.8167	6.9124
357	NM_000517.4:c.91_93delGAG	HBA2:c.91_93delGAG	NM_000517.4:c.91_93delGAG	NP_000508.1:p.(E31del)	P/LP	P/LP	Inframe indels	16:223001-223004	inframe_deletion,splice_region_variant						0.04																			18.35
358	NM_000558.5:c.95+1G>A	HBA1:c.95+1G>A	NM_000558.5:c.95+1G>A	NP_000549.1:p.?	P/LP	P/LP	Splice donor	16:226811-226811	splice_donor_variant						0.99									0.999965	0.854									33							8.182	97.3005
359	NM_000517.4:c.95+2_95+6delTGAGG	HBA2:c.95+2_95+6delTGAGG	NM_000517.4:c.95+2_95+6delTGAGG	NP_000508.1:p.?	P/LP	P/LP	Splice region variant; Splice donor	16:223007-223012	splice_donor_variant,intron_variant																									22.8
360	NM_000517.4:c.95+5G>A	HBA2:c.95+5 G>A	NM_000517.4:c.95+5 G>A	NP_000508.1:p.?	P/LP	P/LP	Splice region variant	16:223011-223011	splice_region_variant,intron_variant						0.11									0.996917	0.666									15.76							3.999	47.5562
361	NM_000558.5:c.95+5G>A	HBA1:c.95+5 G>A	NM_000558.5:c.95+5 G>A	NP_000549.1:p.?	P/LP	P/LP	Splice region variant	16:226815-226815	splice_region_variant,intron_variant						0.1									0.996918	0.694									15.49							3.999	47.5562
362	NM_000517.4:c.95+55G>A	HBA2:c.95+55 G>A	NM_000517.4:c.95+55 G>A	NP_000508.1:p.?	P/LP	P/LP		16:223061-223061	intron_variant						0																			5.891
363	NM_000517.4:c.96-2A>G	HBA2:c.96-2A>G	NM_000517.4:c.96-2A>G	NP_000508.1:p.?	P/LP	P/LP	Splice acceptor	16:223122-223122	splice_acceptor_variant						1									0.999984	0.78									33							7.955	59.4855
364	NM_000558.5:c.96-1G>A	HBA1:c.96-1G>A	NM_000558.5:c.96-1G>A	NP_000549.1:p.?	P/LP	P/LP	Splice acceptor	16:226927-226927	splice_acceptor_variant						1									0.99995	0.932									32							8.75	65.4303
366	NM_000517.4:c.95G>A	HBA2:c.95G>A	NM_000517.4:c.95G>A	NP_000508.1:p.(R32K)	P/LP	P/LP	Splice region variant; Missense codons	16:223006-223006	missense_variant,splice_region_variant	0	0.497415	0.999999	0	0.998	0.42	0.995815	0.994708		0.9343	0.939	0.88	0.694	0.9811	0.999936	0.992	0.919	0.8894	3.94	6.88259	0.452206	-3.27	3.68	-2.88	34	9.03	1.133	0.999	0.986	9.0061	7.98458	4.7	55.8925
367	NM_000517.4:c.99G>A	HBA2:c.99G>A	NM_000517.4:c.99G>A	NP_000508.1:p.(M33I)	P/LP	P/LP	Missense codons	16:223127-223127	missense_variant	0.01	0.516011	1	1e-06	0.661	0	0.992389	0.991544		0.6655	0.884	0.78	0.531	0.76563			0.639	0.8299	-0.978	2.03054	0.389688	-3.19	3.6	-1.74	22.3	0.553	-0.264	0.326	0.979	9.7232	2.63374
368	NM_000517.4:c.101T>C	HBA2:c.101T>C	NM_000517.4:c.101T>C	NP_000508.1:p.(F34S)	P/LP	P/LP	Missense codons	16:223129-223129	missense_variant	0	0.516011	0.999122	0	0.997	0	0.999623	0.997049		1.0934	0.925	0.911	0.711	0.912			0.911	0.9591	4.15	5.01979	0.518584	-4.31	4.295	-7.69	24.4	4.61	1.099	0.324	0.985	10.9947	6.53642
369	NM_000517.4:c.106T>C	HBA2:c.106T>C	NM_000517.4:c.106T>C	NP_000508.1:p.(S36P)	P/LP	P/LP	Missense codons	16:223134-223134	missense_variant	0.06	0.516011	1	0.035597	0.816	0	0.898445	0.974351		0.3325	0.78	0.625	0.619	0.04215			0.631	0.817	-8.31	0.47861	0.299667	-3.18	3.61	-3.05	11.13	-1.104	-0.243	0.265	0.99	0.9631	0.881943
370	NM_000558.5:c.112_114delCCC	HBA1:c.112_114delCCC	NM_000558.5:c.112_114delCCC	NP_000549.1:p.(P38del)	P/LP	P/LP	Inframe indels	16:226943-226946	inframe_deletion						0
371	NM_000558.5:c.118_120delACC	HBA1:c.118_120delACC	NM_000558.5:c.118_120delACC	NP_000549.1:p.(T40del)	P/LP	P/LP	Inframe indels	16:226949-226952	inframe_deletion						0																			21.4
372	NM_000517.4:c.118_124delinsTACTTC	HBA1:c.108_146del9ins8	NM_000558.5:c.108_146del9ins8	NP_000508.1:p.(T40Yfs*10)	P/LP	P/LP	Frameshift	16:223145-223152	frameshift_variant																									32
373	NM_000517.4:c.127T>C	HBA2:c.127T>C	NM_000517.4:c.127T>C	NP_000508.1:p.(Y43H)	P/LP	P/LP	Missense codons	16:223155-223155	missense_variant	0.01	0.516011	0.999985	0	1	0.02	0.997692	0.997178		0.804	0.831	0.883	0.52	0.97145			0.905	0.8709	3.01	4.41388	0.35945	-3.36	3.185	-4.82	24.1	4.658	1.099	1	0.999	8.9872	5.17233
374	NM_000517.4:c.149_150delGC	HBA2:c.149_150delGC	NM_000517.4:c.149_150delGC	NP_000508.1:p.(S50Tfs*7)	P/LP	P/LP	Frameshift	16:223176-223178	frameshift_variant						0.21																			24.1
375	NM_000558.5:c.155_167delGCTCTGCCCAGGT	HBA1:c.155_167delGCTCTGCCCAGGT	NM_000558.5:c.155_167delGCTCTGCCCAGGT	NP_000549.1:p.(G52Vfs*12)	P/LP	P/LP	Frameshift	16:226986-226999	frameshift_variant																									27.2
376	NM_000517.4:c.163C>T	HBA2:c.163C>T	NM_000517.4:c.163C>T	NP_000508.1:p.(Q55*)	P/LP	P/LP	Stop gained	16:223191-223191	stop_gained		0.623552	1	0.052688		0.18		0.997004					0.706	0.3057					3.16	2.31418	0.60412				33	0.141	0.991	0.075	0.303	12.7157	3.90088
377	NM_000517.4:c.179G>A	HBA2:c.179G>A	NM_000517.4:c.179G>A	NP_000508.1:p.(G60D)	P/LP	P/LP	Missense codons	16:223207-223207	missense_variant	0	0.549168	0.999999	0	0.854	0.01	0.998766	0.996823		1.0085	0.994	0.867	0.666	0.95994			0.774	0.9253	3.19	4.82165	0.498434	-3.47	4.675	-6.53	23.1	6.262	0.14	0.859	0.832	10.9379	6.32198
378	NM_000558.5:c.179G>A	HBA1:c.179G>A	NM_000558.5:c.179G>A	NP_000549.1:p.(G60D)	P/LP	P/LP	Missense codons	16:227011-227011	missense_variant	0	0.676563	1	0	0.854	0.01	0.996884	0.997817	0.789121	0.9915	0.994	0.92	0.964	0.95154			0.774	0.8852	4.31	3.51909	0.518105	-3.47		-6.53	24.9	6.099	1.153	0.989	0.865	16.1331	3.60682
379	NM_000517.4:c.178G>C	HBA2:c.178G>C	NM_000517.4:c.178G>C	NP_000508.1:p.(G60R)	P/LP	P/LP	Missense codons	16:223206-223206	missense_variant	0	0.549168	0.999999	0	0.999	0.01	0.998923	0.998522		1.1015	0.983	0.934	0.836	0.8203			0.935	0.9414	4.01	5.67884	0.521563	-3.45	4.675	-7.45	23.7	7.537	1.135	0.811	0.746	15.1882	7.58663
380	NM_000558.5:c.184_186delAAG	HBA1:c.184_186delAAG	NM_000558.5:c.184_186delAAG	NP_000549.1:p.(K62del)	P/LP	P/LP	Inframe indels	16:227015-227018	inframe_deletion						0
381	NM_000558.5:c.187_189delGTG	HBA1:c.187_189delGTG	NM_000558.5:c.187_189delGTG	NP_000549.1:p.(V63del)	P/LP	P/LP	Inframe indels	16:227018-227021	inframe_deletion						0.01																			17.93
382	NM_000558.5:c.187delG	HBA1:c.187delG	NM_000558.5:c.187delG	NP_000549.1:p.(V63Wfs*5)	P/LP	P/LP	Frameshift	16:227018-227019	frameshift_variant						0.02
383	NM_000558.5:c.193_225del33	HBA1:c.193_225del33	NM_000558.5:c.193_225del33	NP_000549.1:p.(A66_D76del)	P/LP	P/LP	Inframe indels	16:227024-227057	inframe_deletion
384	NM_000517.4:c.200T>C	HBA2:c.190T>C	NM_000517.4:c.190T>C	NP_000508.1:p.(L67P)	P/LP	P/LP	Missense codons	16:223228-223228	missense_variant	0	0.549168	1	2.5e-05	1	0	0.999524	0.996233		1.0902	0.945	0.897	0.949	0.72495			0.945	0.9511	4.22	3.03009	0.544077	-3.74	4.31	-6.14	23.4	7.47	1.098	0.141	0.226	12.555	4.37106
385	NM_000558.5:c.212_214delGAC	HBA1:c.212_214delGAC	NM_000558.5:c.212_214delGAC	NP_000549.1:p.(V71del)	P/LP	P/LP	Inframe indels	16:227043-227046	inframe_deletion						0.01
386	NM_000558.5:c.237delC	HBA1:c.237delC	NM_000558.5:c.237delC	NP_000549.1:p.(N79Kfs*6)	P/LP	P/LP	Frameshift	16:227068-227069	frameshift_variant						0																			16.36
387	NC_000016.9:g.227080_227088del	HBA1:c.247_255del	NM_000558.5:c.247_255del	NP_000549.1:p.(A83_S85del)	P/LP	P/LP	Inframe indels	16:227079-227088	inframe_deletion
388	NM_000517.4:c.271A>T	HBA2:c.271A>T	NM_000517.4:c.271A>T	NP_000508.1:p.(K91*)	P/LP	P/LP	Stop gained	16:223299-223299	stop_gained		0.676563	1	4e-05		0		0.992881					0.756	0.93672					4.22	3.76188	0.60412				36	2.544	1.196	0.867	0.311	12.555	5.14472
389	NM_000517.4:c.281T>G	HBA2:c.281T>G	NM_000517.4:c.281T>G	NP_000508.1:p.(V94G)	P/LP	P/LP	Missense codons	16:223309-223309	missense_variant	0	0.676563	1	0	0.999	0	0.999078	0.987435		1.0527	0.958	0.919	0.7	0.9727			0.935	0.9423	4.22	6.24435	0.549965	-4	4.365	-6.62	25.6	4.576	1.039	0.931	0.654	7.5143	7.75372
390	NM_000558.5:c.280_300+1dup	HBA1:c.280_300ins21	NM_000558.5:c.280_300ins21	NP_000549.1:p.(L101Gfs*84)	P/LP	P/LP	Inframe indels	16:227133-227133	splice_donor_variant
391	NM_000517.4:c.300+2T>A	HBA2:c.300+2T>A	NM_000517.4:c.300+2T>A	NP_000508.1:p.?	P/LP	P/LP	Splice donor	16:223330-223330	splice_donor_variant						0.99									0.999985	0.888									32							8.183	85.2662
392	NM_000517.4:c.301-1G>A	HBA2:c.301-1G>A	NM_000517.4:c.301-1G>A	NP_000508.1:p.?	P/LP	P/LP	Splice acceptor	16:223470-223470	splice_acceptor_variant						0.99									0.999985	0.926									34							8.75	89.5415
393	NM_000558.5:c.301-2A>G	HBA1:c.301-2A>G	NM_000558.5:c.301-2A>G	NP_000549.1:p.?	P/LP	P/LP	Splice acceptor	16:227280-227280	splice_acceptor_variant						0.99									0.999982	0.894									33							7.955	81.4061
394	NM_000517.4:c.311A>T	HBA2:c.311A>T	NM_000517.4:c.311A>T	NP_000508.1:p.(H104L)	P/LP	P/LP	Missense codons	16:223481-223481	missense_variant	0.01	0.59774	0.999941	1.2e-05	0.343	0	0.998162	0.967849		0.6087	0.923	0.845	0.443	0.91121			0.514	0.772	4.24	3.81828	0.476578	-3.17	3.24	-8.95	24.3	5.212	1.28	0.997	0.976	9.0222	3.73707
395	NM_000558.5:c.313T>A	HBA1:c.313T>A	NM_000558.5:c.313T>A	NP_000549.1:p.(C105S)	P/LP	P/LP	Missense codons	16:227294-227294	missense_variant	0.09	0.676563	0.944626	0.072456	0.068	0	0.533098	0.903872	0.823018	0.0744	0.889	0.665	0.687	0.61001			0.301	0.7136	0.308	2.13324	0.374575	-3.19		-7.84	15.01	0.566	1.12	1	0.956	5.5378	2.3206
396	NM_000517.4:c.314G>A	HBA2:c.314G>A	NM_000517.4:c.314G>A	NP_000508.1:p.(C105Y)	P/LP	P/LP	Missense codons	16:223484-223484	missense_variant	0	0.59774	0.957507	0.278793	0.75	0	0.980723	0.995715		0.8045	0.915	0.678	0.789	0.30787			0.72	0.869	0.958	2.33098	0.264556	-3.27	4.33	-9.08	24.8	0.402	1.147	0.998	0.989	8.5554	3.1975
397	NM_000517.4:c.327C>A	HBA2:c.326C>A	NM_000517.4:c.326C>A	NP_000508.1:p.(T109N)	P/LP	P/LP	Missense codons	16:223497-223497	synonymous_variant						0																	3.815		7.473
398	NM_000558.5:c.327delC	HBA1:c.327delC	NM_000558.5:c.327delC	NP_000549.1:p.(L110Wfs*24)	P/LP	P/LP	Frameshift	16:227307-227308	frameshift_variant						0
399	NM_000517.4:c.329T>G	HBA2:c.329T>G	NM_000517.4:c.329T>G	NP_000508.1:p.(L110R)	P/LP	P/LP	Missense codons	16:223499-223499	missense_variant	0	0.59774	0.991914	0.023322	0.983	0	0.995048	0.997171		1.0669	0.925	0.845	0.827	0.91757			0.873	0.9429	4.24	4.78359	0.530022	-3.87	4.345	-5.16	25.1	5.551	1.111	0.893	0.797	8.2369	6.15228
402	NM_000517.4:c.339delC	HBA2:c.339delC	NM_000517.4:c.339delC	NP_000508.1:p.(L114Sfs*20)	P/LP	P/LP	Frameshift	16:223508-223509	frameshift_variant						0.01																			23.3
405	NM_000517.4:c.349G>T	HBA2:c.349G>T	NM_000517.4:c.349G>T	NP_000508.1:p.(E117*)	P/LP	P/LP	Stop gained	16:223519-223519	stop_gained		0.59774	1	0.007615		0.16		0.991215					0.67	0.76566					4.07	3.88657	0.475139				35	2.825	1.163	0.004	0.097	15.3112	6.21467
406	NM_000558.5:c.358C>T	HBA1:c.358C>T	NM_000558.5:c.358C>T	NP_000549.1:p.(P120S)	P/LP	P/LP	Missense codons	16:227339-227339	missense_variant	0.02	0.676563	0.99995	0	0.114	0	0.529982	0.970065	0.872813	0.3906	0.884	0.72	0.686	0.79463			0.392	0.7946	0.943	1.55788	0.280808	-3.3		-6.09	16.5	3.345	1.023	0.912	0.692	4.2004	1.84841
407	NM_000558.5:c.370G>C	HBA1:c.370G>C	NM_000558.5:c.370G>C	NP_000549.1:p.(A124P)	P/LP	P/LP	Missense codons	16:227351-227351	missense_variant	0.01	0.549168	0.987536	0.001248	0.661	0	0.992362	0.995276	0.972003	0.7922	0.912	0.835	0.722	0.88541			0.639	0.8353	3.18	1.99793	0.470081	-3.31		-4.03	22.6	2.74	1.172	0.779	0.781	8.5284	2.30837
408	NM_000517.4:c.377T>C	HBA2:c.377T>C	NM_000517.4:c.377T>C	NP_000508.1:p.(L126P)	P/LP	P/LP	Missense codons	16:223547-223547	missense_variant	0	0.676563	1	0.00402	0.995	0	0.899718	0.998727		0.7043	0.973	0.854	0.885	0.66663			0.902	0.8593	3.1	3.54937	0.240459	-3.24	3.665	-5.01	25.4	2.784	1.126	0.587	0.421	5.1017	4.29485
409	NM_000517.4:c.377T>G	HBA2:c.377T>G	NM_000517.4:c.377T>G	NP_000508.1:p.(L126R)	P/LP	P/LP	Missense codons	16:223547-223547	missense_variant	0.02	0.676563	0.999612	0.00402	0.98	0	0.988207	0.997399		0.6963	0.963	0.843	0.882	0.8154			0.807	0.8562	3.1	3.53428	0.36806	-3.23	3.665	-4.1	25.4	2.784	1.126	0.587	0.421	5.1017	4.27136
411	NM_000558.5:c.389T>C	HBA1:c.391T>C	NM_000558.5:c.391T>C	NP_000549.1:p.(L130P)	P/LP	P/LP	Missense codons	16:227370-227370	missense_variant	0	0.549168	0.99909	0.2282	0.973	0	0.995387	0.995348	0.948305	0.8958		0.788	0.947	0.9218			0.859	0.8698	4.17	2.14729	0.500812	-3.39		-5.88	23.3	7.061	1.135	0.034	0.775	12.7202	2.49767
412	NM_000517.4:c.389T>C	HBA2:c.389T>C	NM_000517.4:c.389T>C	NP_000508.1:p.(L130P)	P/LP	P/LP	Missense codons	16:223559-223559	missense_variant	0	0.676563	0.99745	0.298506	0.973	0	0.996352	0.997578		1.0417	0.982	0.787	0.921	0.74897			0.859	0.9319	4.24	3.00373	0.523222	-3.39	4.2	-5.88	23.7	7.171	1.126	0.084	0.025	12.5712	4.31346
413	NM_000517.4:c.391G>C	HBA2:c.391G>C	NM_000517.4:c.391G>C	NP_000508.1:p.(A131P)	P/LP	P/LP	Missense codons	16:223561-223561	missense_variant	0.02	0.676563	1	0.553482	0.224	0	0.335911	0.990691		-0.082	0.849	0.608	0.76	0.1464			0.405	0.7521	0.642	1.07145	0.300269	-3.24	3.98	-3.01	16.1	-0.204	1.163	0.064	0.021	3.3417	1.46528
414	NM_000517.4:c.394T>C	HBA2:c.394T>C	NM_000517.4:c.394T>C	NP_000508.1:p.(S132P)	P/LP	P/LP	Missense codons	16:223564-223564	missense_variant	0.21	0.676563	1	0.135136	0.33	0	0.55	0.949246		-0.1897	0.943	0.559	0.654	0.05717			0.147	0.5768	-8.86	0.148631	0.375026	-3.13	2.565	-2.27	4.23	-3.126	-0.863	0.005	0.028	0.1951	0.247156
416	NM_000558.5:c.396_397insT	HBA1:c.396_397insT	NM_000558.5:c.396_397insT	NP_000549.1:p.(V133Cfs*45)	P/LP	P/LP	Frameshift	16:227377-227377	frameshift_variant						0
417	NM_000517.4:c.410T>C	HBA2:c.410T>C	NM_000517.4:c.410T>C	NP_000508.1:p.(L137P)	P/LP	P/LP	Missense codons	16:223580-223580	missense_variant	0	0.676563	1	2e-06	0.999	0	0.999683	0.998695		1.0342	0.945	0.921	0.931	0.89439			0.935	0.9519	3.3	4.42969	0.550998	-3.99	4.615	-6.56	25.2	4.313	1.128	0.855	0.826	8.1712	5.55101
418	NM_000517.4:c.427T>C	HBA2:c.427T>C	NM_000517.4:c.427T>C	NP_000508.1:p.(*143Qext*31)	P/LP	P/LP	Stop lost	16:223597-223597	stop_lost		0.095506	1			0		0.845615					0.156	0.97452					4.43	9.65992	-0.15463				13.98	4.118	0.126	0.117	0.902	11.4713	13.2164
419	NM_000517.4:c.427T>A	HBA2:c.427T>A	NM_000517.4:c.427T>A	NP_000508.1:p.(*143Kext*31)	P/LP	P/LP	Stop lost	16:223597-223597	stop_lost		0.095506	1			0		0.904521					0.156	0.975					4.43	9.65992	0.0303596				13.47	4.118	0.126	0.117	0.902	11.4713	13.2164
420	NM_000517.4:c.428A>C	HBA2:c.428A>C	NM_000517.4:c.428A>C	NP_000508.1:p.(*143Sext*31)	P/LP	P/LP	Stop lost	16:223598-223598	stop_lost		0.095506	1			0		0.7438					0.156	0.90677					2.17	4.34146	-0.12574				9.288	1.214	-0.053	0.088	0.887	7.0529	6.2821
421	NM_000517.4:c.427T>G	HBA2:c.427T>G	NM_000517.4:c.427T>G	NP_000508.1:p.(*143Eext*31)	P/LP	P/LP	Stop lost	16:223597-223597	stop_lost		0.095506	1			0		0.844692					0.156	0.97528					4.43	9.65992	-0.00766103				11	4.118	0.126	0.117	0.902	11.4713	13.2164
422	NM_000517.4:c.429A>T	HBA2:c.429A>T	NM_000517.4:c.429A>T	NP_000508.1:p.(*143Yext*31)	P/LP	P/LP	Stop lost	16:223599-223599	stop_lost		0.095506	1			0		0.885688					0.156	0.98094					4.43	10.359	0.099672				14.23	4.93	1.3	0.081	0.863	11.4713	13.982
424	NM_000517.4:c.*94A>G	HBA2:c.*94A>G	NM_000517.4:c.*94A>G	NP_000508.1:p.?	P/LP	P/LP	RNA cleavage - Poly(A) signal	16:223693-223693	3_prime_UTR_variant						0																			12.77
425	NM_000517.4:c.*92A>G	HBA2:c.*92A>G	NM_000517.4:c.*92A>G	NP_000508.1:p.?	P/LP	P/LP	RNA cleavage - Poly(A) signal	16:223691-223691	3_prime_UTR_variant						0																			11.73
426	NM_000517.4:c.*93_*94delAA	HBA2:c.*93_*94delAA	NM_000517.4:c.*93_*94delAA	NP_000508.1:p.?	P/LP	P/LP	RNA cleavage - Poly(A) signal	16:223691-223693	3_prime_UTR_variant						0																			11.52
427	NM_000517.4:c.*94A>C	HBA2:c.*94A>C	NM_000517.4:c.*94A>C	NP_000508.1:p.?	P/LP	P/LP	RNA cleavage - Poly(A) signal	16:223693-223693	3_prime_UTR_variant						0																			12.24
428	NM_000517.4:c.*74_*89delCCTTCCTGGTCTTTGA	HBA2:c.*74_*89delCCTTCCTGGTCTTTGA	NM_000517.4:c.*74_*89delCCTTCCTGGTCTTTGA	NP_000508.1:p.?	VUS	P/LP	Other 3'UTR site	16:223672-223688	3_prime_UTR_variant
429	NM_000558.5:c.4G>T	HBA1:c.4G>T	NM_000558.5:c.4G>T	NP_000549.1:p.(V2L)	VUS	VUS	Missense codons	16:226719-226719	missense_variant	0.17	0.516011	1	0.081067	0.007	0	0.532531	0.982063	0.820618	0.606	0.848	0.746	0.772	0.91269			0.059	0.771	3.48	2.96859	0.387603	-3.1		-1.53	18.09	1.75	1.048	0.924	0.19	7.9184	3.1028
431	NM_000517.4:c.4G>A	HBA2:c.4G>A	NM_000517.4:c.4G>A	NP_000508.1:p.(V2M)	VUS	VUS	Missense codons	16:222915-222915	missense_variant	0.31	0.516011	1	0.16974	0.098	0.01	0.485347	0.982578		0.2474	0.663	0.614	0.355	0.80895			0.035	0.6548	2.81	2.12035	0.130203	-3.1	1.315	-1.06	16.4	2.927	1.133	0.996	0.844	9.7028	2.12257
434	NM_000517.4:c.5T>C	HBA2:c.5T>C	NM_000517.4:c.5T>C	NP_000508.1:p.(V2A)	VUS	P/LP	Missense codons	16:222916-222916	missense_variant	0.41	0.516011	0.902452	0.16974	0.117	0.01	0.382162	0.909056		0.0802	0.844	0.608	0.619	0.83989			0.025	0.6271	3.78	1.82909	0.337401	-3.11	1.99	-1.31	16.4	0.94	1.098	0.995	0.846	6.8899	1.68864
435	NM_000558.5:c.8T>G	HBA1:c.8T>G	NM_000558.5:c.8T>G	NP_000549.1:p.(L3R)	VUS	B/LB	Missense codons	16:226723-226723	missense_variant	0.01	0.623552	0.999974	0.000145	0.967	0	0.990199	0.995778	0.963304	0.9944	0.227	0.8	0.376	0.94979			0.815	0.9017	4.45	2.85971	0.384744	-3.96		-5.25	24.8	1.027	1.016	0.651	0.149	11.7536	2.98919
437	NM_000558.5:c.11C>T	HBA1:c.11C>T	NM_000558.5:c.11C>T	NP_000549.1:p.(S4F)	VUS	VUS	Missense codons	16:226726-226726	missense_variant	0	0.623552	0.973673	0.041724	0.08	0	0.686243	0.974802	0.90091	0.9885	0.495	0.626	0.468	0.84387			0.45	0.8872	4.45	2.09287	0.268261	-3.56		-4.29	22.7	3.849	0.917	0.384	0.096	16.4413	2.38946
438	NM_000517.4:c.14C>G	HBA2:c.14C>G	NM_000517.4:c.14C>G	NP_000508.1:p.(P5R)	VUS	VUS	Missense codons	16:222925-222925	missense_variant	0.13	0.516011	1	0.334805	0.042	0	0.100948	0.961986		-0.1561	0.481	0.564	0.136	0.17784			0.255	0.5614	0.108	0.519316	0.128376	-3.14	1.82	-0.38	11.71	-0.25	0.065	0.02	0.167	8.0209	0.491975
439	NM_000517.4:c.14C>A	HBA2:c.14C>A	NM_000517.4:c.14C>A	NP_000508.1:p.(P5H)	VUS	VUS	Missense codons	16:222925-222925	missense_variant	0.05	0.516011	1	0.334805	0.202	0	0.196947	0.977664		0.029	0.454	0.464	0.2	0.08874			0.365	0.6202	0.108	0.600792	0.0887801	-3.17	2.02	-1.02	15.85	-0.25	0.065	0.02	0.167	8.0209	0.604666
441	NM_000558.5:c.17C>A	HBA1:c.17C>A	NM_000558.5:c.17C>A	NP_000549.1:p.(A6D)	VUS	VUS	Missense codons	16:226732-226732	missense_variant	0.61	0.623552	1	0.326564	0	0	0.030989	0.72639	0.805419	-0.1808	0.113	0.544	0.258	0.1028			0.004	0.6831	1.21	0.590718	0.156343	-3.15		-1.17	6.701	-0.565	-0.43	0	0.013	9.615	0.690558
442	NM_000558.5:c.19G>T	HBA1:c.19G>T	NM_000558.5:c.19G>T	NP_000549.1:p.(D7Y)	VUS	P/LP	Missense codons	16:226734-226734	missense_variant	0	0.623552	1	0	1	0	0.998124	0.989526	0.985901	0.967	0.846	0.904	0.866	0.9942			0.945	0.8798	4.45	2.76894	0.503246	-3.44		-7.21	24.5	6.766	1.048	0.077	0.018	14.6083	3.11278
444	NM_000558.5:c.19G>C	HBA1:c.19G>C	NM_000558.5:c.19G>C	NP_000549.1:p.(D7H)	VUS	VUS	Missense codons	16:226734-226734	missense_variant	0	0.623552	1	0	0.999	0	0.997005	0.992013	0.90471	0.967	0.466	0.768	0.709	0.99435			0.935	0.8798	4.45	2.76894	0.353476	-3.43		-5.31	25.2	6.766	1.048	0.077	0.018	14.6083	3.11278
445	NM_000517.4:c.19G>C	HBA2:c.19G>C	NM_000517.4:c.19G>C	NP_000508.1:p.(D7H)	VUS	VUS	Missense codons	16:222930-222930	missense_variant	0	0.516011	0.999997	0	0.999	0	0.998096	0.991926		1.0189	0.466	0.805	0.78	0.97289			0.935	0.919	3.78	4.44538	0.354654	-3.43	4.305	-5.31	24.2	8.93	1.135	0.086	0.013	10.1572	5.90243
447	NM_000558.5:c.20A>G	HBA1:c.20A>G	NM_000558.5:c.20A>G	NP_000549.1:p.(D7G)	VUS	P/LP	Missense codons	16:226735-226735	missense_variant	0	0.623552	0.999999	0	0.998	0	0.991908	0.996402	0.936706	0.7273	0.81	0.817	0.685	0.98974			0.919	0.8115	4.45	2.51943	0.483926	-3.41		-5.83	23.8	5.071	1.168	0.104	0.02	8.0358	2.8639
450	NM_000558.5:c.22A>G	HBA1:c.22A>G	NM_000558.5:c.22A>G	NP_000549.1:p.(K8E)	VUS	VUS	Missense codons	16:226737-226737	missense_variant	0	0.516011	0.999908	0	0.93	0.01	0.987463	0.988264	0.875013	0.6875	0.977	0.78	0.906	0.97316			0.821	0.8241	3.32	1.66696	0.464955	-3.27		-3.04	23	2.763	1.168	0.11	0.018	9.8776	1.95161
451	NM_000517.4:c.23A>G	HBA2:c.23A>G	NM_000517.4:c.23A>G	NP_000508.1:p.(K8R)	VUS	VUS	Missense codons	16:222934-222934	missense_variant	0.27	0.516011	0.999965	0	0.286	0	0.816571	0.994737		0.2501	0.849	0.647	0.508	0.95458			0.121	0.6985	3.78	1.6881	0.254783	-3.16	1.91	-1.78	17.09	5.489	1.262	0.123	0.018	8.3501	1.65512
453	NM_000558.5:c.29A>G	HBA1:c.29A>G	NM_000558.5:c.29A>G	NP_000549.1:p.(N10S)	VUS	P/LP	Missense codons	16:226744-226744	missense_variant	0.44	0.623552	1	0.061865	0.148	0	0.0243448	0.922614	0.884811	-0.0141	0.958	0.414	0.706	0.30058			0.026	0.6847	3.32	1.00568	-0.167456	-3.12		-1.65	9.705	-0.261	1.168	0.012	0.007	4.9053	1.19915
454	NM_000517.4:c.29A>G	HBA2:c.29A>G	NM_000517.4:c.29A>G	NP_000508.1:p.(N10S)	VUS	P/LP	Missense codons	16:222940-222940	missense_variant	0.44	0.516011	0.762801	0.061865	0.148	0	0.426834	0.978708		0.6257	0.958	0.493	0.819	0.1732			0.026	0.7061	3.72	1.3095	0.101087	-3.12	2.83	-1.65	13.66	0.85	1.262	0.058	0.032	11.6263	1.41028
456	NM_000558.5:c.30C>A	HBA1:c.30C>A	NM_000558.5:c.30C>A	NP_000549.1:p.(N10K)	VUS	B/LB	Missense codons	16:226745-226745	missense_variant	0.34	0.623552	1	0.061865	0.162	0	0.260662	0.96408	0.653235	-0.1504	0.96	0.516	0.843	0.32012			0.037	0.6264	-1.58	0.734852	0.102966	-3.03		-2.36	11.25	-0.155	0.917	0.014	0.01	2.7687	0.942165
456	NM_000558.5:c.30C>G	HBA1:c.30C>G	NM_000558.5:c.30C>G	NP_000549.1:p.(N10K)	VUS	B/LB	Missense codons	16:226745-226745	missense_variant	0.34	0.623552	1	0.061865	0.162	0	0.231749	0.964156	0.653235	-0.1504	0.96	0.496	0.843	0.25684			0.037	0.6264	-1.58	0.734852	0.102976	-3.03		-2.36	11.03	-0.155	0.917	0.014	0.01	2.7687	0.942165
457	NM_000517.4:c.30C>G	HBA2:c.30C>G	NM_000517.4:c.30C>G	NP_000508.1:p.(N10K)	VUS	B/LB	Missense codons	16:222941-222941	missense_variant	0.34	0.516011	0.999999	0.061865	0.162	0.01	0.476925	0.983522		-0.1309	0.96	0.477	0.884	0.14828			0.037	0.5984	-0.0596	0.883584	0.0944748	-3.03	2.94	-2.36	14.49	-2.203	0.988	0.069	0.042	5.4825	0.883592
458	NM_000517.4:c.34A>C	HBA2:c.34A>C	NM_000517.4:c.34A>C	NP_000549.1:p.(K12Q)	VUS	B/LB	Missense codons	16:222945-222945	missense_variant	0.17	0.516011	1	3e-06	0.027	0	0.649925	0.952427		0.2813	0.627	0.532	0.304	0.59705			0.06	0.7037	3.72	1.25871	0.212488	-3.31		-1.6	17.99	3.683	1.262	0.174	0.068	10.1862	1.24016
461	NM_000517.4:c.38C>A	HBA2:c.38C>A	NM_000517.4:c.38C>A	NP_000508.1:p.(A13D)	VUS	B/LB	Missense codons	16:222949-222949	missense_variant	0.03	0.516011	0.999998	0.052208	0.025	0.03	0.255767	0.912		-0.0836	0.952	0.558	0.765	0.06461			0.365	0.6546	1.51	0.606969	0.367893	-3.18	1.985	-2.27	15.09	0.164	0.987	0.019	0.043	8.0388	0.595478
464	NM_000517.4:c.45G>C	HBA2:c.45G>C	NM_000517.4:c.45G>C	NP_000508.1:p.(W15C)	VUS	VUS	Missense codons	16:222956-222956	missense_variant	0.01	0.516011	1	8e-06	0.997	0.01	0.995121	0.970492		1.0455	0.737	0.69	0.565	0.91387			0.872	0.9402	3.72	2.99849	0.337925	-3.85	4.27	-11.73	23.4	3.884	1.13	0.032	0.026	9.6591	4.45153
465	NM_000558.5:c.46G>C	HBA1:c.46G>C	NM_000558.5:c.46G>C	NP_000549.1:p.(G16R)	VUS	B/LB	Missense codons	16:226761-226761	missense_variant	0.25	0.623552	1	0.74704	0.187	0.03	0.0502885	0.948276	0.592841	0.2577	0.467	0.59	0.765	0.37407			0.054	0.7669	-3.05	0.434279	0.362073	-3.22		-1.55	15.86	-0.533	0.1	0.011	0.001	7.1278	0.58731
466	NM_000558.5:c.47G>A	HBA1:c.47G>A	NM_000558.5:c.47G>A	NP_000549.1:p.(G16D)	VUS	P/LP	Missense codons	16:226762-226762	missense_variant	0.44	0.623552	1	0.74704	0.003	0.06	0.100886	0.83072	0.689231	-0.247	0.827	0.526	0.71	0.0995			0.013	0.6146	-8.9	0.0887922	0.239016	-3.16		-0.25	1.769	-3.146	-0.214	0.002	0	7.2853	0.171144
467	NM_000517.4:c.49A>G	HBA2:c.49A>G	NM_000517.4:c.49A>G	NP_000508.1:p.(K17E)	VUS	B/LB	Missense codons	16:222960-222960	missense_variant	0.01	0.516011	1	0.000396	0.075	0	0.924484	0.508674		0.2554	0.876	0.614	0.829	0.8742			0.411	0.7917	1.42	0.731678	0.432739	-3.3	4.29	-3.75	13.32	4.349	0.246	0.001	0.001	4.8715	0.755717
468	NM_000558.5:c.50A>T	HBA1:c.50A>T	NM_000558.5:c.50A>T	NP_000549.1:p.(K17M)	VUS	B/LB	Missense codons	16:226765-226765	missense_variant	0	0.623552	0.98327	0.00054	0.818	0	0.986506	0.986931	0.924208	0.744	0.309	0.593	0.714	0.98074			0.754	0.8472	3.32	1.43524	0.292263	-3.42		-5.61	22.8	6.006	0.184	0.002	0	9.4199	1.62806
469	NM_000517.4:c.50A>C	HBA2:c.50A>C	NM_000517.4:c.50A>C	NP_000508.1:p.(K17T)	VUS	B/LB	Missense codons	16:222961-222961	missense_variant	0.01	0.516011	1	0.000396	0.089	0.01	0.957	0.900539		0.2259	0.706	0.502	0.681	0.90061			0.412	0.7756	1.52	0.825942	0.252759	-3.35	3.74	-5.58	13.11	6.351	0.248	0.001	0.002	5.784	0.830875
470	NM_000558.5:c.51G>T	HBA2:c.51G>T	NM_000517.4:c.51G>T	NP_000549.1:p.(K17N)	VUS	VUS	Missense codons	16:226766-226766	missense_variant	0	0.623552	0.85608	0.00054	0.65	0.01	0.992954	0.980993	0.851115	0.7373	0.84	0.596	0.708	0.70727			0.672	0.8143	4.43	1.43191	0.161758	-3.38		-4.67	23.1	0.831	1.048	0.003	0.001	8.2346	1.71771
471	NM_000558.5:c.55G>C	HBA1:c.55G>C	NM_000558.5:c.55G>C	NP_000549.1:p.(G19R)	VUS	B/LB	Missense codons	16:226770-226770	missense_variant	0.01	0.623552	1	0.002807	0.777	0.08	0.324367	0.99744	0.69753	0.3993	0.179	0.462	0.651	0.54739			0.696	0.7655	4.43	1.37954	0.253712	-3.1		-3.87	22.4	-0.053	1.048	0.003	0	11.6599	1.66093
473	NM_000558.5:c.59C>A	HBA2:c.59C>A	NM_000517.4:c.59C>A	NP_000549.1:p.(A20E)	VUS	VUS	Missense codons	16:226774-226774	missense_variant	0.19	0.623552	1	0.479859	0.003	0	0.0617444	0.727244	0.619338	0.0908	0.184	0.524	0.254	0.22467			0.05	0.6876	-8.86	0.0799243	0.0773671	-3.15		-1.01	0.022	-0.803	-0.749	0	0	7.663	0.150628
476	NM_000517.4:c.61C>G	HBA2:c.61C>G	NM_000517.4:c.61C>G	NP_000508.1:p.(H21D)	VUS	VUS	Missense codons	16:222972-222972	missense_variant	0.1	0.516011	0.999998	0.000794	0.04	0.01	0.375655	0.704227		-0.341	0.872	0.52	0.76	0.1358			0.289	0.5493	-1.21	0.239281	0.272869	-2.95	1.51	-4.98	5.341	-0.363	0.05	0.001	0.004	8.9129	0.235002
479	NM_000517.4:c.63C>A	HBA2:c.63C>A	NM_000517.4:c.63C>A	NP_000508.1:p.(H21Q)	VUS	B/LB	Missense codons	16:222974-222974	missense_variant	0.67	0.516011	0.999999	0.000794	0.036	0	0.0955535	0.638716		-0.4972	0.942	0.488	0.698	0.01649			0.005	0.5649	-5.19	0.0363508	0.281021	-3.16	1.235	-4.05	0.002	-4.542	-1.1	0	0.006	5.407	0.0429693
481	NM_000517.4:c.64G>C	HBA2:c.64G>C	NM_000517.4:c.64G>C	NP_000508.1:p.(A22P)	VUS	B/LB	Missense codons	16:222975-222975	missense_variant	0.06	0.516011	1	0.02224	0.327	0.06	0.084791	0.983646		-0.0981	0.831	0.572	0.222	0.11346			0.425	0.647	2.96	0.831268	0.111673	-3.26	2.155	-2.49	14.96	0.55	1.133	0.001	0.008	6.3289	0.805675
482	NM_000558.5:c.65C>A	HBA1:c.65C>A	NM_000558.5:c.65C>A	NP_000549.1:p.(A22D)	VUS	VUS	Missense codons	16:226780-226780	missense_variant	0.01	0.623552	1	0.066733	0.831	0	0.796031	0.948122	0.962704	0.1237	0.288	0.579	0.314	0.32922			0.722	0.7065	-4.96	0.397294	0.184505	-3.21		-2.95	16.69	-4.121	0.059	0.001	0.001	8.0819	0.588057
484	NM_000558.5:c.70G>C	HBA2:c.70G>C	NM_000517.4:c.70G>C	NP_000508.1:p.(E24Q)	P/LP	P/LP	Missense codons	16:226785-226785	missense_variant	0.41	0.623552	1	0.03627	0.024	0.01	0.415344	0.952564	0.518148	0.2338	0.916	0.646	0.479	0.59116			0.016	0.7367	1.3	0.943059	0.268606	-3.25	2.055	-1.48	9.567	0.832	0.877	0.004	0.007	6.1031	1.15751
490	NM_000517.4:c.73T>G	HBA2:c.73T>G	NM_000517.4:c.73T>G	NP_000508.1:p.(Y25D)	VUS	P/LP	Missense codons	16:222984-222984	missense_variant	0.02	0.516011	0.999914	0.000267	0.92	0	0.93277	0.963429		0.2211	0.744	0.542	0.43	0.04944			0.754	0.8064	2.83	1.08327	0.22008	-3.08	2.665	-7.13	19.46	0.489	0.148	0	0.055	8.3439	1.49925
491	NM_000558.5:c.74A>G	HBA1:c.74A>G	NM_000558.5:c.74A>G	NP_000549.1:p.(Y25C)	VUS	VUS	Missense codons	16:226789-226789	missense_variant	0.02	0.623552	0.999989	0.000267	0.977	0.08	0.974971	0.992079	0.934107	0.0667	0.858	0.599	0.329	0.62922			0.802	0.7195	1.91	0.951978	0.385634	-3.14		-5.99	21.9	0.118	-0.211	0.001	0.021	8.6984	1.15769
493	NM_000517.4:c.80C>T	HBA2:c.80C>T	NM_000517.4:c.80C>T	NP_000508.1:p.(A27V)	VUS	VUS	Missense codons	16:222991-222991	missense_variant	0.02	0.516011	1	0.003439	0.192	0.04	0.737703	0.995643		-0.167	0.906	0.608	0.779	0.2258			0.401	0.5879	0.31	0.871429	0.180198	-3.2	2.085	-2.52	17.47	-0.623	0.079	0.009	0.465	9.1448	1.05064
494	NM_000517.4:c.80C>A	HBA2:c.80C>A	NM_000517.4:c.80C>A	NP_000549.1:p.(A27E)	VUS	B/LB	Missense codons	16:222991-222991	missense_variant	0.09	0.516011	1	0.003439	0.379	0.43	0.942298	0.98187		0.2371	0.785	0.682	0.33	0.12779			0.417	0.7719	0.31	1.01076	0.17113	-3.24		-2.97	16.36	-0.623	0.079	0.009	0.465	9.1448	1.34765
495	NM_000517.4:c.82G>A	HBA2:c.82G>A	NM_000517.4:c.82G>A	NP_000508.1:p.(E28K)	VUS	P/LP	Missense codons	16:222993-222993	missense_variant	0	0.516011	0.999816	4.7e-05	0.935	0	0.996696	0.999051		0.9832	0.86	0.84	0.596	0.95165			0.825	0.8822	3.94	4.68916	0.277813	-3.23	3.005	-3.78	25.3	7.163	1.133	0.663	0.695	15.0481	5.60638
496	NM_000558.5:c.83A>G	HBA2:c.83A>G	NM_000517.4:c.83A>G	NP_000508.1:p.(E28G)	VUS	B/LB	Missense codons	16:226798-226798	missense_variant	0	0.623552	0.999986	4.7e-05	0.997	0.27	0.996633	0.998317	0.974403	0.7706	0.924	0.887	0.459	0.97529			0.911	0.8217	4.45	3.45151	0.326881	-3.36	4.505	-6.63	31	6.222	1.172	0.675	0.591	9.544	3.4717
497	NM_000517.4:c.83A>T	HBA2:c.83A>T	NM_000517.4:c.83A>T	NP_000549.1:p.(E28V)	VUS	P/LP	Missense codons	16:222994-222994	missense_variant	0	0.516011	0.999783	4.7e-05	0.996	0.07	0.996315	0.987236		0.9395	0.922	0.901	0.776	0.93076			0.906	0.8992	3.94	4.82079	0.453416	-3.39		-6.63	25.9	4.224	1.264	0.871	0.816	7.8167	6.00103
499	NM_000517.4:c.84G>C	HBA2:c.84G>C	NM_000517.4:c.84G>C	NP_000508.1:p.(E28D)	VUS	B/LB	Missense codons	16:222995-222995	missense_variant	0.15	0.516011	0.993865	4.7e-05	0.205	0	0.90118	0.995474		0.0753	0.98	0.678	0.734	0.34528			0.261	0.6816	0.0231	1.3759	0.327019	-3.21	2.5	-2.83	16.82	-1.12	1.133	0.934	0.885	7.2248	1.51396
502	NM_000517.4:c.91G>C	HBA2:c.91G>C	NM_000517.4:c.91G>C	NP_000508.1:p.(E31Q)	VUS	B/LB	Missense codons	16:223002-223002	missense_variant	0.07	0.516011	0.939911	0.938907	0.05	0.03	0.0786742	0.982067		-0.0133	0.882	0.661	0.698	0.51911			0.322	0.6804	0.476	1.45758	0.240526	-3.14	2.325	-1.82	16.61	0.38	1.132	0.999	0.99	1.9138	1.47821
503	NM_000517.4:c.91G>A	HBA2:c.91G>A	NM_000517.4:c.91G>A	NP_000508.1:p.(E31K)	VUS	B/LB	Missense codons	16:223002-223002	missense_variant	0.05	0.516011	0.946097	0.938907	0.278	0	0.791225	0.997518		0.1212	0.756	0.616	0.481	0.48722			0.375	0.7188	0.476	1.7205	0.166871	-3.08	3.71	-2.72	22.3	0.38	1.132	0.999	0.99	1.9138	1.93704
504	NM_000558.5:c.92A>C	HBA1:c.92A>C	NM_000558.5:c.92A>C	NP_000549.1:p.(E31A)	VUS	VUS	Missense codons	16:226807-226807	missense_variant	0.13	0.623552	0.642225	0.942072	0.267	0.09	0.240111	0.980412	0.884712	0.1099	0.738	0.664	0.184	0.36827			0.281	0.758	2.11	1.53917	0.134384	-3.08		-3.77	17.3	-0.031	0.224	0.891	0.819	5.8813	1.73802
505	NM_000558.5:c.92A>T	HBA1:c.92A>T	NM_000558.5:c.92A>T	NP_000549.1:p.(E31V)	VUS	P/LP	Missense codons	16:226807-226807	missense_variant	0.1	0.623552	0.808126	0.942072	0.056	0.18	0.506542	0.969977	0.868613	0.1941	0.724	0.682	0.448	0.50158			0.29	0.7909	2.11	1.53917	0.223576	-3.21		-4.67	21.1	-0.031	0.224	0.891	0.819	5.8813	1.73802
506	NM_000517.4:c.96G>C	HBA2:c.96G>C	NM_000517.4:c.96G>C	NP_000508.1:p.(R32S)	VUS	P/LP	Splice region variant; Missense codons	16:223124-223124	missense_variant,splice_region_variant	0	0.516011	0.999989	0	0.999	0.06	0.997427	0.994659		0.8145	0.946	0.874	0.932	0.95088	0.256164	0.49	0.935	0.8909	2.16	3.25118	0.488441	-3.37	3.82	-5.76	25.1	1.902	1.135	0.422	0.936	7.5636	4.32389	1.919	14.3498
506	NM_000517.4:c.96G>T	HBA2:c.96G>T	NM_000517.4:c.96G>T	NP_000508.1:p.(R32S)	VUS	P/LP	Splice region variant; Missense codons	16:223124-223124	missense_variant,splice_region_variant	0	0.516011	0.999988	0	0.999	0.1	0.997427	0.994531		0.8145	0.946	0.874	0.932	0.94878	0.888097	0.632	0.935	0.8909	2.16	3.25118	0.488439	-3.37	3.82	-5.76	27.8	1.902	1.135	0.422	0.936	7.5636	4.32389	2.537	18.9711
509	NM_000558.5:c.104T>G	HBA1:c.104T>G	NM_000558.5:c.104T>G	NP_000549.1:p.(L35R)	VUS	P/LP	Missense codons	16:226936-226936	missense_variant	0.05	0.623552	1	0.002413	0.014	0	0.17768	0.753785	0.842016	-0.1961	0.412	0.614	0.544	0.1345			0.346	0.629	-6.39	0.288582	0.115873	-3.09		-2.24	10.15	-3.977	-1.331	0.141	0.948	5.6269	0.397642
511	NM_000517.4:c.107C>A	HBA2:c.107C>A	NM_000517.4:c.107C>A	NP_000508.1:p.(S36Y)	VUS	VUS	Missense codons	16:223135-223135	missense_variant	0.01	0.516011	1	0.035597	0.939	0	0.986442	0.983265		0.3436	0.483	0.501	0.485	0.04369			0.79	0.8836	-3.14	1.13512	0.169035	-3.18	3.61	-3.67	19.09	-0.181	0.991	0.597	0.993	12.0136	1.7251
512	NM_000517.4:c.109T>C	HBA2:c.109T>C	NM_000517.4:c.109T>C	NP_000508.1:p.(F37L)	VUS	VUS	Missense codons	16:223137-223137	missense_variant	0.02	0.516011	0.501455	0.004861	0.044	0	0.987438	0.98743		0.2294	0.717	0.543	0.473	0.84607			0.386	0.6999	3.06	1.81112	0.196073	-3.16	3.54	-4.9	22.7	2.973	1.099	0.91	0.997	4.2348	1.77647
514	NM_000517.4:c.113C>T	HBA2:c.113C>T	NM_000517.4:c.113C>T	NP_000508.1:p.(P38L)	VUS	P/LP	Missense codons	16:223141-223141	missense_variant	0.01	0.516011	1	0	0.661	0	0.999852	0.997525		1.0644	0.938	0.93	0.776	0.98299			0.639	0.9776	4.15	6.67068	0.539079	-5.48	4.735	-9.45	27.4	5.618	0.991	0.994	0.999	15.5112	7.78297
515	NM_000558.5:c.113C>G	HBA2:c.113C>G	NM_000517.4:c.113C>G	NP_000508.1:p.(P38R)	VUS	VUS	Missense codons	16:226945-226945	missense_variant	0	0.623552	1	0	0.986	0	0.997693	0.997008	0.981302	1.0928	0.945	0.94	0.646	0.97025			0.879	0.9653	4.45	4.27443	0.517674	-5.48	4.735	-8.5	26.4	1.198	1.006	0.998	0.997	14.613	4.02468
517	NM_000558.5:c.116C>T	HBA1:c.116C>T	NM_000558.5:c.116C>T	NP_000549.1:p.(T39I)	VUS	VUS	Missense codons	16:226948-226948	missense_variant	0.01	0.623552	0.776094	0.000114	0.582	0	0.989211	0.998053	0.916408	0.425	0.482	0.734	0.503	0.37768			0.606	0.776	1.22	1.59628	0.247911	-3.17		-3.4	23.2	-0.359	1.006	1	0.998	10.1532	1.80917
520	NM_000558.5:c.121A>G	HBA2:c.121A>C	NM_000517.4:c.121A>C	NP_000508.1:p.(K41Q)	VUS	VUS	Missense codons	16:226953-226953	missense_variant	0	0.623552	1	0	0.938	0.01	0.995906	0.998194	0.970703	0.9007	0.87	0.892	0.71	0.94664			0.828	0.863	4.45	4.0445	0.369639	-3.41	2.01	-3.86	26.9	1.455	1.285	1	0.999	11.7574	3.8256
521	NM_000517.4:c.122A>T	HBA2:c.122A>T	NM_000517.4:c.122A>T	NP_000508.1:p.(K41M)	VUS	P/LP	Missense codons	16:223150-223150	missense_variant	0.01	0.516011	0.999988	0	0.991	0.05	0.997248	0.994616		0.8544	0.894	0.836	0.782	0.78272			0.85	0.9145	2.87	5.08216	0.266443	-3.44	4.12	-5.79	25	4.725	1.266	1	1	5.5478	6.3792
522	NM_000558.5:c.122A>C	HBA1:c.122A>C	NM_000558.5:c.122A>C	NP_000549.1:p.(K41T)	VUS	VUS	Missense codons	16:226954-226954	missense_variant	0.02	0.623552	1	0	0.989	0.04	0.997123	0.997742	0.89841	0.9007	0.86	0.952	0.677	0.97754			0.823	0.863	4.45	4.6947	0.364386	-3.43		-5.78	26.9	8.474	1.285	1	0.999	11.7574	4.32393
523	NM_000558.5:c.123G>C	HBA1:c.123G>C	NM_000558.5:c.123G>C	NP_000549.1:p.(K41N)	VUS	P/LP	Missense codons	16:226955-226955	missense_variant	0.01	0.623552	1	0	0.989	0.02	0.995736	0.998403	0.912309	0.9655	0.929	0.916	0.73	0.95615			0.845	0.8791	4.31	4.40311	0.234289	-3.45		-4.82	28.1	7.259	1.152	1	0.999	14.3002	4.1252
524	NM_000517.4:c.123G>C	HBA2:c.123G>C	NM_000517.4:c.123G>C	NP_000508.1:p.(K41N)	VUS	VUS	Missense codons	16:223151-223151	missense_variant	0.01	0.516011	0.999992	0	0.989	0.02	0.997776	0.996885		1.0146	0.929	0.926	0.794	0.98407			0.845	0.9107	3.99	7.34335	0.229094	-3.45	4.12	-4.82	26.1	4.479	0.216	1	1	11.2512	8.45476
528	NM_000517.4:c.130T>A	HBA2:c.130T>A	NM_000517.4:c.130T>A	NP_000508.1:p.(F44I)	P/LP	VUS	Missense codons	16:223158-223158	missense_variant	0	0.516011	0.999919	0	0.991	0	0.997984	0.988698		0.9366	0.97	0.959	0.909	0.88732			0.889	0.9945	4.15	6.66135	0.550143	-7.15	4.74	-5.79	24	5.788	1.099	0.996	0.998	12.4349	8.35241
529	NM_000517.4:c.132C>G	HBA2:c.132C>G	NM_000517.4:c.132C>G	NP_000508.1:p.(F44L)	VUS	P/LP	Missense codons	16:223160-223160	missense_variant	0	0.516011	0.99998	0	0.8	0	0.984885	0.997303		1.0111	0.971	0.93	0.798	0.94612			0.746	0.9921	3.2	3.88707	0.503753	-7.15	4.74	-5.78	23.5	0.544	0.104	0.969	0.995	10.9379	4.86869
530	NM_000558.5:c.133C>G	HBA1:c.133C>G	NM_000558.5:c.133C>G	NP_000549.1:p.(P45A)	VUS	VUS	Missense codons	16:226965-226965	missense_variant	0.14	0.623552	0.990149	0.021281	0.021	0	0.563581	0.904608	0.80372	0.4879	0.784	0.755	0.707	0.32591			0.251	0.793	-1.52	1.03629	0.392023	-3.18		-5.64	12.27	-1.641	-0.255	0.886	0.976	9.2407	1.14671
533	NM_000558.5:c.134C>T	HBA2:c.134C>T	NM_000517.4:c.134C>T	NP_000508.1:p.(P45L)	VUS	P/LP	Missense codons	16:226966-226966	missense_variant	0.07	0.623552	0.999997	0.021281	0.18	0.01	0.965426	0.997215	0.848415	0.5428	0.29	0.544	0.47	0.48486			0.336	0.8016	2.27	1.74284	0.183075	-3.26	3.185	-7.64	19.41	0.683	1.006	0.881	0.975	7.9461	1.99553
536	NM_000558.5:c.137A>G	HBA1:c.137A>G	NM_000558.5:c.137A>G	NP_000549.1:p.(H46R)	VUS	P/LP	Missense codons	16:226969-226969	missense_variant	0.02	0.623552	0.999998	0	0.263	0.01	0.997104	0.980676	0.838216	0.8036	0.731	0.814	0.68	0.92777			0.411	0.8186	4.31	3.5855	0.270318	-3.05		-7.77	22.3	1.557	1.285	0.883	0.973	12.9419	3.54568
537	NM_000517.4:c.137A>G	HBA2:c.137A>C	NM_000517.4:c.137A>C	NP_000508.1:p.(H46P)	VUS	P/LP	Missense codons	16:223165-223165	missense_variant	0.02	0.516011	0.999953	0	0.263	0.01	0.997063	0.923348		0.5734	0.731	0.786	0.74	0.95576			0.411	0.768	4.15	3.34043	0.277142	-3.05	4.055	-7.77	19.8	4.835	1.266	0.982	0.996	7.4241	3.40696
541	NM_000517.4:c.142G>C	HBA2:c.142G>C	NM_000517.4:c.142G>C	NP_000508.1:p.(D48H)	VUS	P/LP	Missense codons	16:223170-223170	missense_variant	0	0.516011	0.999965	0	0.65	0.01	0.666605	0.987761		0.5879	0.964	0.789	0.623	0.98098			0.672	0.8058	3.19	2.7411	0.477757	-3.43	3.37	-6.63	22.7	5.34	0.197	0.984	0.994	7.7356	3.20099
542	NM_000558.5:c.142G>A	HBA1:c.142G>A	NM_000558.5:c.142G>A	NP_000549.1:p.(D48N)	VUS	VUS	Missense codons	16:226974-226974	missense_variant	0.07	0.623552	0.666461	0	0.164	0.06	0.974422	0.993554	0.889211	0.8052	0.86	0.588	0.481	0.82279			0.334	0.794	3.33	2.18979	0.135421	-3.32		-4.69	15.94	2.438	0.21	0.77	0.949	8.5269	2.47975
543	NM_000517.4:c.142G>T	HBA2:c.142G>T	NM_000517.4:c.142G>T	NP_000508.1:p.(D48Y)	VUS	B/LB	Missense codons	16:223170-223170	missense_variant	0	0.516011	0.999983	0	0.971	0.01	0.999659	0.988719		0.9389	0.804	0.792	0.719	0.98004			0.857	0.9186	3.19	3.99912	0.363877	-3.45	4.41	-8.61	23.1	5.34	0.197	0.984	0.994	7.7356	5.35917
546	NM_000517.4:c.146T>G	HBA2:c.146T>G	NM_000517.4:c.146T>G	NP_000508.1:p.(L49R)	VUS	VUS	Missense codons	16:223174-223174	missense_variant	0	0.516011	0.853739	0.300509	0.859	0	0.982911	0.993323		0.983	0.899	0.754	0.44	0.93099			0.776	0.907	4.15	3.61952	0.351231	-3.22	4.085	-5.19	23	2.433	1.099	0.99	0.977	7.4241	4.62413
547	NM_000558.5:c.146T>C	HBA1:c.146T>C	NM_000558.5:c.146T>C	NP_000549.1:p.(L49P)	VUS	VUS	Missense codons	16:226978-226978	missense_variant	0	0.623552	0.998658	0.300509	0.95	0	0.963035	0.996124	0.953805	0.2073	0.711	0.641	0.617	0.47956			0.838	0.7731	3.17	1.65515	0.291968	-3.24		-5.82	22.4	2.491	1.115	0.825	0.914	5.7977	1.93915
548	NM_000517.4:c.150C>A	HBA2:c.150C>A	NM_000517.4:c.150C>A	NP_000508.1:p.(S50R)	VUS	B/LB	Missense codons	16:223178-223178	missense_variant	0.11	0.516011	0.99193	4.7e-05	0.797	0.04	0.988188	0.994388		0.8091	0.642	0.73	0.678	0.31523			0.571	0.8552	3.17	1.75426	0.403092	-3.3	3.31	-2.56	18.63	0.341	0.065	0.94	0.928	10.9441	2.39973
549	NM_000517.4:c.151C>G	HBA2:c.151C>G	NM_000517.4:c.151C>G	NP_000508.1:p.(H51D)	VUS	B/LB	Missense codons	16:223179-223179	missense_variant	0.07	0.516011	0.930186	0.0399	0.202	0.01	0.764571	0.843256		-0.1963	0.635	0.528	0.426	0.34039			0.339	0.5518	1.98	1.01457	0.159607	-3.06	2.925	-3.52	13.15	2.394	0.991	0.917	0.893	8.4199	0.929468
550	NM_000558.5:c.152A>T	HBA1:c.152A>T	NM_000558.5:c.152A>T	NP_000549.1:p.(H51L)	VUS	B/LB	Missense codons	16:226984-226984	missense_variant	0.1	0.623552	1	0.020335	0.102	0.12	0.711835	0.845731	0.69563	0.2661	0.576	0.55	0.493	0.13497			0.294	0.733	-4.99	0.675981	0.173625	-3.1		-5.26	9.807	-0.496	0.252	0.757	0.691	14.3047	0.878447
552	NM_000517.4:c.153C>A	HBA2:c.153C>A	NM_000517.4:c.153C>A	NP_000508.1:p.(H51Q)	VUS	B/LB	Missense codons	16:223181-223181	missense_variant	0.15	0.516011	0.999923	0.0399	0.018	0	0.552871	0.796381		-0.6766	0.926	0.516	0.623	0.04344			0.241	0.438	-8.31	0.0884587	0.285868	-2.98	1.99	-2.62	0.1	-4.135	-0.342	0.846	0.743	5.0303	0.0935172
552	NM_000517.4:c.153C>G	HBA2:c.153C>G	NM_000517.4:c.153C>G	NP_000508.1:p.(H51Q)	VUS	B/LB	Missense codons	16:223181-223181	missense_variant	0.15	0.516011	0.999923	0.0399	0.018	0.01	0.552871	0.744162		-0.6766	0.926	0.516	0.623	0.03977			0.241	0.438	-8.31	0.0884587	0.285865	-2.98	1.99	-2.62	0.154	-4.135	-0.342	0.846	0.743	5.0303	0.0935172
553	NM_000558.5:c.154G>A	HBA1:c.154G>A	NM_000558.5:c.154G>A	NP_000549.1:p.(G52S)	VUS	B/LB	Missense codons	16:226986-226986	missense_variant	0.03	0.623552	0.935109	0.000303	0.383	0.01	0.666932	0.993805	0.907509	0.6778		0.772	0.435	0.78059			0.487	0.8027	3.33	2.25449	0.18235	-3.21		-4.94	20.3	0.759	0.152	0.697	0.545	7.6432	2.51772
554	NM_000517.4:c.154G>C	HBA2:c.154G>C	NM_000517.4:c.154G>C	NP_000508.1:p.(G52R)	VUS	B/LB	Missense codons	16:223182-223182	missense_variant	0.02	0.516011	0.985025	0.000523	0.503	0.11	0.895262	0.997455		0.7805	0.959	0.799	0.533	0.82731			0.551	0.8236	4.15	3.82295	0.350467	-3.29	3.14	-6.62	23.1	2.083	1.135	0.854	0.733	9.3887	4.13898
556	NM_000558.5:c.157_180del	HBA1:c.157_180del	NM_000558.5:c.157_180del	NP_000549.1:p.(S53_G60del)	VUS	P/LP	Inframe indels	16:226988-227012	inframe_deletion
557	NM_000517.4:c.158C>T	HBA2:c.158C>T	NM_000517.4:c.158C>T	NP_000508.1:p.(S53F)	VUS	VUS	Missense codons	16:223186-223186	missense_variant	0	0.623552	0.999999	0	0.999	0.08	0.99786	0.997278		1.1	0.879	0.884	0.836	0.89178			0.935	0.9373	4.15	5.65291	0.326456	-3.46	4.44	-5.9	24.8	3.046	0.991	0.583	0.532	15.5112	7.04956
558	NM_000558.5:c.161C>A	HBA2:c.161C>A	NM_000517.4:c.161C>A	NP_000508.1:p.(A54D)	VUS	B/LB	Missense codons	16:226993-226993	missense_variant	0.1	0.623552	0.999999	0.429935	0.018	0	0.143948	0.841917	0.582242	0.1402	0.813	0.589	0.553	0.07412			0.287	0.7239	-4.58	0.332695	0.157916	-3.26	2.345	-2.86	4.311	-0.364	-0.793	0.19	0.111	9.9916	0.48114
559	NM_000558.5:c.163C>G	HBA1:c.163C>G	NM_000558.5:c.163C>G	NP_000549.1:p.(Q55E)	VUS	B/LB	Missense codons	16:226995-226995	missense_variant	0.03	0.623552	1	0.052688	0.387	0	0.509478	0.97061	0.938806	0.0442	0.866	0.663	0.586	0.16137			0.488	0.7113	2.19	1.0667	0.321256	-3.09		-2.29	13.62	-0.244	1.007	0.242	0.116	7.3394	1.29555
560	NM_000517.4:c.164A>G	HBA2:c.164A>G	NM_000517.4:c.164A>G	NP_000508.1:p.(Q55R)	VUS	B/LB	Missense codons	16:223192-223192	missense_variant	0.04	0.623552	0.953767	0.052688	0.692	0.02	0.966956	0.985422		0.2795	0.657	0.643	0.59	0.37655			0.597	0.7599	4.15	1.71708	0.260489	-3.11	2.77	-3.62	22.1	2.178	1.266	0.08	0.298	12.4349	2.18339
561	NM_000558.5:c.166G>C	HBA1:c.166G>C	NM_000558.5:c.166G>C	NP_000549.1:p.(V56L)	VUS	B/LB	Missense codons	16:226998-226998	missense_variant	0.4	0.623552	0.999451	0.047122	0.014	0	0.302877	0.829371	0.856614	0.2227	0.853	0.621	0.65	0.21365			0.017	0.7438	-5.11	0.319157	0.30311	-3.18		-1.37	0.385	-0.038	0.073	0.204	0.088	13.3569	0.470695
562	NM_000558.5:c.167T>C	HBA1:c.167T>C	NM_000558.5:c.167T>C	NP_000549.1:p.(V56A)	VUS	VUS	Missense codons	16:226999-226999	missense_variant	0.01	0.623552	0.691014	0.047122	0.275	0	0.681747	0.828281	0.758824	0.8875	0.972	0.691	0.796	0.91553			0.435	0.7961	4.31	2.26642	0.471688	-3.35		-3.59	19.32	7.277	1.117	0.191	0.083	7.8366	2.64677
563	NM_000517.4:c.167T>C	HBA2:c.167T>C	NM_000517.4:c.167T>C	NP_000508.1:p.(V56A)	VUS	P/LP	Missense codons	16:223195-223195	missense_variant	0.01	0.623552	0.999999	0.103505	0.275	0	0.463845	0.845869		0.4419	0.972	0.644	0.482	0.42841			0.435	0.8303	3.02	1.69088	0.452772	-3.35	3.545	-3.59	15.98	3.73	1.099	0.05	0.243	9.8972	1.91062
566	NM_000558.5:c.170A>C	HBA1:c.170A>C	NM_000558.5:c.170A>C	NP_000549.1:p.(K57T)	VUS	B/LB	Missense codons	16:227002-227002	missense_variant	0.01	0.676563	0.99976	0.000184	0.119	0.01	0.955627	0.990542	0.864814	0.516	0.61	0.578	0.765	0.27218			0.415	0.7825	1.87	0.903785	0.244103	-3.46		-4.42	16.75	-0.023	1.286	0.13	0.081	3.6912	1.10202
567	NM_000558.5:c.171G>C	HBA1:c.171G>C	NM_000558.5:c.171G>C	NP_000549.1:p.(K57N)	VUS	B/LB	Missense codons	16:227003-227003	missense_variant	0.02	0.676563	0.999767	0.000184	0.04	0.03	0.904536	0.928358	0.59994	0.4597	0.564	0.467	0.578	0.36257			0.386	0.7804	-0.086	0.634025	0.132719	-3.46		-3.42	14.7	0.077	-0.143	0.099	0.079	5.0969	0.779092
567	NM_000558.5:c.171G>T	HBA1:c.171G>T	NM_000558.5:c.171G>T	NP_000549.1:p.(K57N)	VUS	B/LB	Missense codons	16:227003-227003	missense_variant	0.02	0.676563	0.999767	0.000184	0.04	0	0.884482	0.935475	0.59994	0.4597	0.564	0.467	0.578	0.34867			0.386	0.7804	-0.086	0.634025	0.132719	-3.46		-3.42	14.64	0.077	-0.143	0.099	0.079	5.0969	0.779092
568	NM_000558.5:c.172G>C	HBA1:c.172G>C	NM_000558.5:c.172G>C	NP_000549.1:p.(G58R)	VUS	VUS	Missense codons	16:227004-227004	missense_variant	0.04	0.676563	0.947695	0.411231	0.187	0.02	0.179867	0.94614	0.835216	0.1063	0.449	0.575	0.493	0.26577			0.366	0.7226	3.35	0.966564	0.241478	-3.08		-2.41	16.6	1.049	-0.146	0.092	0.101	7.7781	1.12393
569	NM_000558.5:c.173G>A	HBA1:c.173G>A	NM_000558.5:c.173G>A	NP_000549.1:p.(G58D)	P/LP	B/LB	Missense codons	16:227005-227005	missense_variant	0.04	0.676563	0.999957	0.411231	0.094	0.04	0.160544	0.897199	0.463154	0.0893	0.484	0.595	0.553	0.05518			0.356	0.6913	-4.29	0.186837	0.172948	-3.1		-2.64	7.607	-2.838	-0.884	0.097	0.148	9.9788	0.278946
570	NM_000558.5:c.175C>T	HBA2:c.175C>T	NM_000517.4:c.175C>T	NP_000549.1:p.(H59Y)	VUS	P/LP	Missense codons	16:227007-227007	missense_variant	0.01	0.676563	1	0	0.984	0	0.997335	0.995045	0.910309	1.0213	0.917	0.847	0.856	0.90853			0.836	0.9157	4.31	2.47712	0.358316	-4.04		-5.56	23.3	5.475	1.007	0.659	0.486	11.4073	2.81643
571	NM_000517.4:c.177C>A	HBA2:c.177C>A	NM_000517.4:c.177C>A	NP_000508.1:p.(H59Q)	VUS	P/LP	Missense codons	16:223205-223205	missense_variant	0.03	0.549168	0.995792	0	0.502	0	0.972678	0.838823		0.388	0.955	0.598	0.585	0.03616			0.532	0.8287	-8.31	0.518112	0.302502	-3.71	3.105	-7.02	12.37	-5.126	-0.246	0.661	0.602	5.0302	0.871917
573	NM_000558.5:c.178G>A	HBA1:c.178G>A	NM_000558.5:c.178G>A	NP_000549.1:p.(G60S)	VUS	VUS	Missense codons	16:227010-227010	missense_variant	0.01	0.676563	1	0	0.992	0	0.991652	0.998169	0.842016	0.849	0.919	0.899	0.928	0.93617			0.853	0.8401	4.31	3.40356	0.330992	-3.38		-5.43	24.6	6.099	1.153	0.967	0.821	12.0958	3.52971
577	NM_000558.5:c.181A>G	HBA2:c.181A>G	NM_000517.4:c.181A>G	NP_000508.1:p.(K61E)	VUS	VUS	Missense codons	16:227013-227013	missense_variant	0.07	0.676563	0.999981	0.016326	0.034	0.01	0.371075	0.958597	0.683732	0.1206	0.343	0.644	0.501	0.58019			0.321	0.6999	-3.68	1.21675	0.197819	-3.14	2.56	-1.94	15.44	0.243	1.286	0.998	0.913	6.4261	1.42869
578	NM_000558.5:c.183G>T	HBA1:c.183G>T	NM_000558.5:c.183G>T	NP_000549.1:p.(K61N)	VUS	P/LP	Missense codons	16:227015-227015	missense_variant	0.02	0.676563	1	0.016326	0.109	0	0.567805	0.991348	0.714229	0.5249	0.191	0.499	0.575	0.8143			0.392	0.7985	2.28	2.00116	0.15644	-3.19		-2.69	22.5	0.83	1.153	1	0.93	7.8021	2.2343
581	NM_000517.4:c.185A>C	HBA2:c.185A>C	NM_000517.4:c.185A>C	NP_000508.1:p.(K62T)	VUS	P/LP	Missense codons	16:223213-223213	missense_variant	0.13	0.549168	0.997913	0.00034	0.984	0.01	0.995523	0.996462		0.865	0.883	0.851	0.429	0.79442			0.683	0.8508	4.15	4.55983	0.279018	-3.28	2.405	-5.74	22.7	2.908	1.266	0.988	0.952	12.4349	4.9604
582	NM_000558.5:c.186G>C	HBA1:c.186G>C	NM_000558.5:c.186G>C	NP_000549.1:p.(K62N)	VUS	P/LP	Missense codons	16:227018-227018	missense_variant	0.02	0.676563	0.995576	0.00034	0.979	0.01	0.996297	0.997644	0.868313	0.7362	0.94	0.752	0.697	0.74048			0.805	0.8219	2.29	2.16371	0.167654	-3.39		-4.76	23.9	0.056	1.153	0.992	0.928	10.2847	2.3869
582	NM_000558.5:c.186G>T	HBA1:c.186G>T	NM_000558.5:c.186G>T	NP_000549.1:p.(K62N)	VUS	P/LP	Missense codons	16:227018-227018	missense_variant	0.02	0.676563	0.995576	0.00034	0.979	0.01	0.996297	0.997724	0.868313	0.7362	0.94	0.752	0.697	0.72771			0.805	0.8219	2.29	2.16371	0.167652	-3.39		-4.76	24	0.056	1.153	0.992	0.928	10.2847	2.3869
583	NM_000517.4:c.187G>A	HBA2:c.187G>A	NM_000517.4:c.187G>A	NP_000508.1:p.(V63M)	VUS	P/LP	Missense codons	16:223215-223215	missense_variant	0	0.549168	0.99713	6.6e-05	0.988	0.04	0.993262	0.998197		1.0297	0.934	0.869	0.763	0.49663			0.882	0.9386	2.92	5.58793	0.462769	-3.86	3.785	-2.83	23.4	2.989	0.197	0.985	0.946	8.8505	6.78292
585	NM_000558.5:c.191C>A	HBA1:c.191C>A	NM_000558.5:c.191C>A	NP_000549.1:p.(A64D)	VUS	VUS	Missense codons	16:227023-227023	missense_variant	0.01	0.676563	0.999999	0.006698	0.966	0.01	0.990677	0.992295	0.953605	0.1535	0.702	0.677	0.746	0.15471			0.814	0.7449	0.364	0.903979	0.37592	-3.19		-4.3	20.5	0.476	0.125	0.362	0.787	8.5341	1.1118
587	NM_000558.5:c.193G>C	HBA1:c.193G>C	NM_000558.5:c.193G>C	NP_000549.1:p.(D65H)	VUS	VUS	Missense codons	16:227025-227025	missense_variant	0.08	0.676563	1	0.093574	0.801	0	0.23283	0.983461	0.862314	0.1774	0.898	0.663	0.67	0.24939			0.601	0.7669	2.34	0.821032	0.396562	-3.18		-3.33	16.55	0.103	1.153	0.22	0.582	9.8199	0.959457
588	NM_000517.4:c.193G>A	HBA2:c.193G>A	NM_000517.4:c.193G>A	NP_000508.1:p.(D65N)	VUS	VUS	Missense codons	16:223221-223221	missense_variant	0.49	0.549168	1	0.093523	0.012	0	0.0592547	0.994126		-0.2571	0.91	0.315	0.561	0.04133			0.011	0.6019	4.15	1.0813	-0.0721779	-3.07	1.33	-1.77	14.71	0.727	1.135	0.754	0.734	10.8716	0.92263
590	NM_000517.4:c.196G>A	HBA2:c.196G>A	NM_000517.4:c.196G>A	NP_000508.1:p.(A66T)	VUS	VUS	Missense codons	16:223224-223224	missense_variant	0.01	0.549168	0.999327	1e-05	0.992	0	0.99734	0.998265		0.5117	0.784	0.568	0.416	0.80992			0.853	0.9013	4.15	4.14783	0.237959	-3.4	3.74	-3.66	22.9	6.311	1.135	0.374	0.543	9.3887	5.4854
593	NM_000517.4:c.205A>G	HBA2:c.205A>G	NM_000517.4:c.205A>G	NP_000549.1:p.(N69D)	VUS	B/LB	Missense codons	16:223233-223233	missense_variant	0.71	0.549168	1	0.273946	0.003	0.01	0.236991	0.761042		-0.5469	0.753	0.312	0.622	0.0345			0.002	0.4589	-8.44	0.0475213	0.0122773	-3.14		0.17	0.009	-0.808	-0.684	0	0.004	5.7906	0.0518478
594	NM_000558.5:c.205A>C	HBA1:c.205A>C	NM_000558.5:c.205A>C	NP_000549.1:p.(N69H)	VUS	B/LB	Missense codons	16:227037-227037	missense_variant	0.11	0.676563	1	0.35902	0.411	0	0.0986866	0.817523	0.670533	-0.2357	0.936	0.405	0.693	0.07174			0.405	0.6514	-8.62	0.0228139	0.0743415	-3.19		-1.41	0.002	-0.058	-0.493	0	0.002	5.1691	0.050625
595	NM_000517.4:c.205A>C	HBA2:c.205A>C	NM_000517.4:c.205A>C	NP_000508.1:p.(N69H)	VUS	VUS	Missense codons	16:223233-223233	missense_variant	0.11	0.549168	1	0.273946	0.411	0	0.240362	0.933215		-0.0234	0.936	0.445	0.718	0.12008			0.405	0.71	-8.44	0.105424	0.0387004	-3.19	1.805	-1.41	0.231	-0.808	-0.684	0	0.004	5.7906	0.160858
596	NM_000517.4:c.207C>A	HBA2:c.207C>A	NM_000517.4:c.207C>A	NP_000508.1:p.(N69K)	VUS	B/LB	Missense codons	16:223235-223235	missense_variant	0.75	0.549168	0.999999	0.273946	0.009	0	0.0799488	0.784968		-0.441	0.954	0.377	0.655	0.03548			0.002	0.4004	-8.44	0.0109195	-0.0101603	-3.07	-0.53	-0.89	0.034	-8.507	0.99	0.009	0.014	0.7078	0.0132006
596	NM_000517.4:c.207C>G	HBA2:c.207C>G	NM_000517.4:c.207C>G	NP_000508.1:p.(N69K)	VUS	B/LB	Missense codons	16:223235-223235	missense_variant	0.75	0.549168	0.999999	0.273946	0.009	0	0.083554	0.576998		-0.441	0.954	0.377	0.655	0.0193			0.002	0.4004	-8.44	0.0109195	-0.010177	-3.07	-0.53	-0.89	0.026	-8.507	0.99	0.009	0.014	0.7078	0.0132006
597	NM_000558.5:c.207_208insGCGCTGACCAAC	HBA1:c.207_208insGCGCTGACCAAC	NM_000558.5:c.207_208insGCGCTGACCAAC	NP_000549.1:p.(L67_A70dup)	VUS	P/LP	Inframe indels	16:227039-227039	inframe_insertion																									15.56
598	NM_000517.4:c.208G>A	HBA2:c.208G>A	NM_000517.4:c.208G>A	NP_000508.1:p.(A70T)	VUS	VUS	Missense codons	16:223236-223236	missense_variant	0.02	0.549168	0.999987	0	0.972	0	0.998227	0.997959		1.0614	0.873	0.836	0.67	0.92279			0.797	0.9111	4.22	3.48534	0.300982	-3.35	3.925	-3.85	23.3	5.118	1.132	0.012	0.02	15.6564	4.81897
599	NM_000558.5:c.211G>A	HBA1:c.211G>A	NM_000558.5:c.211G>A	NP_000549.1:p.(V71M)	VUS	P/LP	Missense codons	16:227043-227043	missense_variant	0.01	0.676563	1	0.321575	0.931	0	0.90054	0.996282	0.917108	0.4518	0.715	0.474	0.459	0.25214			0.783	0.8391	4.31	1.40733	0.180355	-3.46		-2.3	22.4	2.002	1.153	0.016	0.016	9.9173	1.70734
602	NM_000517.4:c.217C>G	HBA2:c.217C>G	NM_000517.4:c.217C>G	NP_000508.1:p.(H73D)	VUS	VUS	Missense codons	16:223245-223245	missense_variant	0.02	0.676563	0.999965	1.3e-05	0.894	0	0.8873	0.932019		0.276	0.936	0.548	0.703	0.24205			0.735	0.8224	0.887	1.0731	0.412773	-3.23	3.15	-6.22	18.1	-0.244	0.99	0.017	0.005	4.5007	1.53764
604	NM_000558.5:c.218A>G	HBA2:c.218A>G	NM_000517.4:c.218A>G	NP_000508.1:p.(H73R)	VUS	B/LB	Missense codons	16:227050-227050	missense_variant	0.03	0.676563	0.99819	1.3e-05	0.843	0	0.981426	0.991524	0.70443	0.3526	0.933	0.608	0.618	0.63393			0.688	0.8027	4.31	1.64149	0.412931	-3.23	3.495	-5.63	22.2	5.546	1.286	0.004	0.007	12.9419	1.98514
605	NM_000517.4:c.219C>A	HBA2:c.219C>A	NM_000517.4:c.219C>A	NP_000508.1:p.(H73Q)	VUS	B/LB	Missense codons	16:223247-223247	missense_variant	0.06	0.676563	0.99985	1.3e-05	0.932	0	0.990823	0.946371		0.4751	0.842	0.578	0.56	0.08416			0.701	0.877	2.24	1.36807	0.273999	-3.15	3.385	-5.47	15.55	-0.062	-0.268	0.021	0.006	9.7823	2.11024
606	NM_000558.5:c.223G>A	HBA2:c.223G>A	NM_000517.4:c.223G>A	NP_000508.1:p.(D75N)	VUS	B/LB	Missense codons	16:227055-227055	missense_variant	0.01	0.676563	0.99997	0	0.337	0	0.96201	0.983606	0.89841	0.7579	0.985	0.646	0.637	0.91543			0.512	0.8559	3.32	1.88898	0.1872	-3.6	2.75	-3.95	20.9	7.267	0.229	0.037	0.015	7.9124	2.25978
607	NM_000558.5:c.223G>C	HBA1:c.223G>C	NM_000558.5:c.223G>C	NP_000549.1:p.(D75H)	VUS	B/LB	Missense codons	16:227055-227055	missense_variant	0.01	0.676563	0.999994	0	0.983	0	0.995536	0.944488	0.759324	0.7758	0.968	0.753	0.928	0.93107			0.835	0.8575	3.32	1.89871	0.525542	-3.66		-5.79	23	7.267	0.229	0.037	0.015	7.9124	2.27432
608	NM_000558.5:c.224A>T	HBA1:c.224A>T	NM_000558.5:c.224A>T	NP_000549.1:p.(D75V)	VUS	VUS	Missense codons	16:227056-227056	missense_variant	0	0.676563	1	0	0.983	0	0.999138	0.972721	0.970103	0.8516	0.916	0.742	0.922	0.94532			0.873	0.8615	4.31	2.21015	0.523826	-3.68		-7.86	23.5	8.47	1.286	0.065	0.016	7.8366	2.58577
609	NM_000558.5:c.224A>G	HBA1:c.224A>G	NM_000558.5:c.224A>G	NP_000549.1:p.(D75G)	P/LP	P/LP	Missense codons	16:227056-227056	missense_variant	0.01	0.676563	0.999992	0	0.97	0	0.997468	0.990007	0.893211	0.8516	0.956	0.784	0.94	0.93279			0.818	0.8615	4.31	2.21015	0.536811	-3.56		-6.03	23.7	8.47	1.286	0.065	0.016	7.8366	2.58577
611	NM_000517.4:c.226_228delGAC	HBA2:c.226_228delGAC	NM_000517.4:c.226_228delGAC	NP_000508.1:p.(D76del)	VUS	P/LP	Inframe indels	16:223253-223256	inframe_deletion						0																			15.41
612	NM_000517.4:c.226G>A	HBA2:c.226G>A	NM_000517.4:c.226G>A	NP_000508.1:p.(D76N)	VUS	B/LB	Missense codons	16:223254-223254	missense_variant	0.38	0.676563	0.999763	9.9e-05	0.054	0	0.535779	0.959297		-0.0028	0.697	0.391	0.385	0.50643			0.021	0.6413	3.19	0.836941	0.11262	-3.23	1.02	-2.89	15.7	0.771	1.073	0.354	0.059	9.303	0.762557
613	NM_000517.4:c.226G>C	HBA2:c.226G>C	NM_000517.4:c.226G>C	NP_000508.1:p.(D76H)	VUS	B/LB	Missense codons	16:223254-223254	missense_variant	0.04	0.676563	0.999954	9.9e-05	0.584	0	0.965222	0.91932		0.69	0.752	0.679	0.584	0.79178			0.55	0.8378	3.19	1.1934	0.346215	-3.47	3.26	-5.39	22.7	0.771	1.073	0.354	0.059	9.303	1.43291
614	NM_000517.4:c.226G>T	HBA2:c.226G>T	NM_000517.4:c.226G>T	NP_000508.1:p.(D76Y)	VUS	B/LB	Missense codons	16:223254-223254	missense_variant	0.01	0.676563	0.99998	9.9e-05	0.971	0	0.999381	0.95743		0.9679	0.973	0.753	0.788	0.78721			0.819	0.9188	3.19	1.86995	0.493968	-3.5	4.36	-7.51	23.1	0.771	1.073	0.354	0.059	9.303	2.94944
615	NM_000517.4:c.227A>T	HBA2:c.227A>T	NM_000517.4:c.227A>T	NP_000508.1:p.(D76V)	VUS	P/LP	Missense codons	16:223255-223255	missense_variant	0	0.676563	1	9.9e-05	0.237	0	0.997323	0.807123		0.8219	0.97	0.8	0.709	0.98704			0.468	0.8592	4.22	2.13251	0.518243	-3.5	4.36	-7.71	22.2	5.49	1.196	0.356	0.064	12.555	2.45521
616	NM_000517.4:c.227A>G	HBA2:c.227A>G	NM_000517.4:c.227A>G	NP_000508.1:p.(D76G)	VUS	VUS	Missense codons	16:223255-223255	missense_variant	0	0.676563	0.999983	9.9e-05	0.849	0	0.993021	0.991737		1.0122	0.88	0.816	0.652	0.98606			0.77	0.8991	4.22	3.15199	0.376974	-3.44	3.665	-5.59	23.6	5.49	1.196	0.356	0.064	12.555	4.10703
618	NM_000517.4:c.230T>C	HBA2:c.230T>C	NM_000517.4:c.230T>C	NP_000508.1:p.(M77T)	VUS	B/LB	Missense codons	16:223258-223258	missense_variant	0	0.676563	0.863066	0.051504	0.285	0	0.874382	0.735762		0.2917	0.576	0.521	0.476	0.98237			0.532	0.7273	4.22	1.74989	0.178024	-3.17	1.08	-2.87	20.5	5.72	1.04	0.295	0.058	12.555	1.80239
620	NM_000517.4:c.231G>A	HBA2:c.231G>A	NM_000517.4:c.231G>A	NP_000508.1:p.(M77I)	VUS	VUS	Missense codons	16:223259-223259	missense_variant	0.25	0.676563	0.999993	0.051504	0.001	0	0.404847	0.892144		-0.6529	0.433	0.361	0.254	0.37543			0.037	0.342	2.11	0.20192	0.0659791	-3.02	-0.71	0.42	8.426	0.229	0.141	0.271	0.047	8.0129	0.121763
621	NM_000517.4:c.233C>A	HBA2:c.233C>A	NM_000517.4:c.233C>A	NP_000508.1:p.(P78H)	VUS	B/LB	Missense codons	16:223261-223261	missense_variant	0.03	0.676563	1	0.053453	0.078	0	0.922536	0.993463		-0.127	0.934	0.543	0.541	0.17689			0.37	0.6183	2	0.688797	0.404855	-3.13	2.61	-4.1	15.11	-0.077	0.938	0.202	0.037	8.5295	0.669939
622	NM_000517.4:c.233C>T	HBA2:c.233C>T	NM_000517.4:c.233C>T	NP_000508.1:p.(P78L)	VUS	VUS	Missense codons	16:223261-223261	missense_variant	0.04	0.676563	0.999999	0.053453	0.049	0	0.611633	0.98323		-0.0899	0.568	0.515	0.454	0.35667			0.352	0.6398	2	0.69267	0.179268	-3.08	2.845	-4.95	15.59	-0.077	0.938	0.202	0.037	8.5295	0.680623
625	NM_000558.5:c.235A>C	HBA1:c.235A>C	NM_000558.5:c.235A>C	NP_000549.1:p.(N79H)	VUS	VUS	Missense codons	16:227067-227067	missense_variant	0.04	0.676563	1	0.544796	0.003	0	0.0927292	0.79074	0.391261	-0.1134	0.837	0.375	0.738	0.11047			0.349	0.6644	-5.41	0.0236717	0.0489989	-3.15		-1.07	0.077	-3.192	-1.774	0.001	0.004	3.7937	0.0382376
628	NM_000517.4:c.239C>G	HBA2:c.239C>G	NM_000517.4:c.239C>G	NP_000508.1:p.(A80G)	VUS	P/LP	Missense codons	16:223267-223267	missense_variant	0.23	0.676563	0.749632	0.000119	0.699	0	0.907815	0.9948		0.716	0.732	0.569	0.321	0.41811			0.293	0.7976	4.22	1.78301	0.151002	-3.25	1.965	-3.46	21.9	1.064	0.938	0.005	0.002	13.8242	2.27819
629	NM_000517.4:c.241C>G	HBA2:c.241C>G	NM_000517.4:c.241C>G	NP_000508.1:p.(L81V)	VUS	P/LP	Missense codons	16:223269-223269	missense_variant	0	0.676563	0.991516	1.2e-05	0.892	0	0.996834	0.987267		0.7595	0.931	0.709	0.665	0.89728			0.796	0.8919	1.06	1.7412	0.443985	-3.32	3.905	-2.82	20.5	1.383	0.071	0.031	0.004	6.2306	2.60849
630	NM_000558.5:c.242T>G	HBA2:c.242T>G	NM_000517.4:c.242T>G	NP_000508.1:p.(L81R)	VUS	P/LP	Missense codons	16:227074-227074	missense_variant	0	0.676563	0.999412	1.2e-05	0.999	0	0.994429	0.996423	0.970603	0.7881	0.913	0.856	0.907	0.97358			0.935	0.8374	4.31	3.1402	0.482403	-3.59	4.455	-5.67	24.6	3.612	1.049	0.327	0.031	7.8366	3.2999
631	NM_000517.4:c.244T>C	HBA2:c.244T>C	NM_000517.4:c.244T>C	NP_000508.1:p.(S82P)	VUS	P/LP	Missense codons	16:223272-223272	missense_variant	0	0.676563	0.998388	0.000495	0.943	0	0.998301	0.995366		0.9881	0.924	0.728	0.668	0.37324			0.832	0.8933	4.22	2.13617	0.450388	-3.23	3.88	-4.37	23.7	-0.049	1.04	0.052	0.007	12.555	3.06406
632	NM_000558.5:c.245C>G	HBA1:c.245C>G	NM_000558.5:c.245C>G	NP_000549.1:p.(S82C)	VUS	B/LB	Missense codons	16:227077-227077	missense_variant	0.02	0.676563	0.998119	0.000495	0.433	0	0.71549	0.988621	0.868113	0.8083	0.798	0.701	0.539	0.54984			0.524	0.8405	3.34	1.54846	-0.00157966	-3.24		-3.87	21.7	0.883	0.947	0.226	0.026	12.7929	1.81283
633	NM_000558.5:c.247G>A	HBA1:c.247G>A	NM_000558.5:c.247G>A	NP_000549.1:p.(A83T)	VUS	VUS	Missense codons	16:227079-227079	missense_variant	0.35	0.676563	1	0.279841	0.001	0	0.0907201	0.966586	0.758824	-0.0187	0.785	0.545	0.327	0.03216			0.021	0.6968	-0.547	0.495118	0.221966	-3.14		-0.87	6.83	-1.659	-1.153	0.013	0.021	9.5472	0.627294
635	NM_000517.4:c.251T>C	HBA2:c.251T>C	NM_000517.4:c.251T>C	NP_000508.1:p.(L84P)	VUS	P/LP	Missense codons	16:223279-223279	missense_variant	0	0.676563	1	0	1	0	0.999449	0.995698		1.0856	0.961	0.912	0.936	0.96519			0.945	0.9638	4.22	3.56634	0.568324	-4.34	4.705	-6.7	23.6	7.381	1.04	0.05	0.023	12.555	5.12936
637	NM_000558.5:c.253A>C	HBA1:c.253A>C	NM_000558.5:c.253A>C	NP_000549.1:p.(S85R)	VUS	P/LP	Missense codons	16:227085-227085	missense_variant	0.07	0.676563	0.999999	0	1	0	0.998312	0.996681	0.884611	0.7564	0.834	0.867	0.594	0.93744			0.819	0.8185	4.31	2.56596	0.277283	-3.28		-4.58	22.8	3.073	1.207	0.748	0.483	9.3306	2.87436
637	NM_000558.5:c.255C>A	HBA1:c.255C>A	NM_000558.5:c.255C>A	NP_000549.1:p.(S85R)	VUS	P/LP	Missense codons	16:227087-227087	missense_variant	0.07	0.676563	0.999979	0	1	0	0.997994	0.992964	0.884611	0.2514	0.834	0.72	0.594	0.73516			0.819	0.7526	-7.19	0.429971	0.21985	-3.28		-4.58	14.64	-0.969	-0.287	0.834	0.618	7.5116	0.57998
637	NM_000558.5:c.255C>G	HBA1:c.255C>G	NM_000558.5:c.255C>G	NP_000549.1:p.(S85R)	VUS	P/LP	Missense codons	16:227087-227087	missense_variant	0.07	0.676563	0.99998	0	1	0	0.998324	0.992328	0.884611	0.2514	0.834	0.72	0.594	0.58281			0.819	0.7526	-7.19	0.429971	0.220033	-3.28		-4.58	14.75	-0.969	-0.287	0.834	0.618	7.5116	0.57998
638	NM_000517.4:c.254G>A	HBA2:c.254G>A	NM_000517.4:c.254G>A	NP_000508.1:p.(S85N)	VUS	VUS	Missense codons	16:223282-223282	missense_variant	0	0.676563	0.99983	0	0.956	0	0.998854	0.980972		0.9345	0.834	0.769	0.649	0.95673			0.844	0.912	3.26	2.64724	0.244241	-3.3	4.685	-2.78	22.2	7.439	0.151	0.269	0.067	8.6636	3.8109
639	NM_000558.5:c.256G>A	HBA1:c.256G>A	NM_000558.5:c.256G>A	NP_000549.1:p.(D86N)	VUS	P/LP	Missense codons	16:227088-227088	missense_variant	0.14	0.676563	0.999909	0	0.452	0	0.981818	0.997963	0.814918	0.6609	0.779	0.693	0.473	0.83269			0.397	0.8134	3.35	2.21312	0.128925	-3.18		-3.28	22.7	5.071	1.083	0.94	0.743	9.8627	2.45314
641	NM_000558.5:c.256G>C	HBA1:c.256G>C	NM_000558.5:c.256G>C	NP_000549.1:p.(D86H)	VUS	VUS	Missense codons	16:227088-227088	missense_variant	0.02	0.676563	0.999982	0	0.991	0	0.996987	0.993306	0.70183	0.7205	0.76	0.863	0.695	0.90535			0.827	0.8235	3.35	2.23707	0.476117	-3.23		-5.2	24.1	5.071	1.083	0.94	0.743	9.8627	2.484
642	NM_000517.4:c.257A>T	HBA2:c.257A>T	NM_000517.4:c.257A>T	NP_000508.1:p.(D86V)	VUS	P/LP	Missense codons	16:223285-223285	missense_variant	0.02	0.676563	1	0	0.968	0	0.998322	0.994156		0.8524	0.869	0.923	0.728	0.97337			0.793	0.8449	4.22	4.24155	0.455967	-3.15	2.36	-7.33	24.3	5.519	1.196	0.714	0.212	12.555	4.81899
645	NM_000517.4:c.262C>T	HBA2:c.262C>T	NM_000517.4:c.262C>T	NP_000508.1:p.(H88Y)	VUS	P/LP	Missense codons	16:223290-223290	missense_variant	0	0.676563	1	0	0.993	0	0.998945	0.995952		0.8837	0.989	0.977	0.76	0.98174			0.895	0.9963	4.22	6.46371	0.556749	-7.53	4.735	-5.74	24.3	5.58	0.938	0.816	0.273	15.6564	8.57888
647	NM_000558.5:c.262C>G	HBA1:c.262C>G	NM_000558.5:c.262C>G	NP_000549.1:p.(H88D)	VUS	P/LP	Missense codons	16:227094-227094	missense_variant	0	0.676563	1	0	0.986	0	0.999014	0.990136	0.973703	0.9264	0.987	0.914	0.917	0.96628			0.879	0.9916	3.34	2.93022	0.546773	-7.54		-8.61	24.1	5.421	0.947	0.991	0.952	12.7929	3.09099
649	NM_000558.5:c.263A>C	HBA1:c.263A>C	NM_000558.5:c.263A>C	NP_000549.1:p.(H88P)	VUS	B/LB	Missense codons	16:227095-227095	missense_variant	0	0.676563	1	0	0.792	0	0.999814	0.979323	0.848715	1.0669	0.967	0.827	0.911	0.96308			0.742	0.9875	3.21	2.70345	0.50927	-7.53		-9.56	23.3	6.636	1.207	0.983	0.958	4.782	2.92514
654	NM_000517.4:c.268C>T	HBA2:c.268C>T	NM_000517.4:c.268C>T	NP_000508.1:p.(H90Y)	VUS	VUS	Missense codons	16:223296-223296	missense_variant	1	0.676563	0.999265	0.000748	0.012	0	0.120821	0.921127		-0.5247	0.684	0.518	0.451	0.07345			0.001	0.5304	1.16	0.509616	0.0703956	-3.1	0.925	-1.88	4.234	-1.069	0.067	0.739	0.237	4.9336	0.457544
657	NM_000517.4:c.269A>T	HBA2:c.269A>T	NM_000517.4:c.269A>T	NP_000508.1:p.(H90L)	VUS	P/LP	Missense codons	16:223297-223297	missense_variant	0.04	0.676563	0.980298	0.000748	0.375	0	0.985698	0.950143		0.517	0.829	0.708	0.495	0.83269			0.468	0.7209	4.22	1.7764	0.342678	-3.09	2.29	-7.01	21.8	2.242	1.196	0.827	0.275	12.555	1.88416
658	NM_000558.5:c.270C>G	HBA1:c.270C>G	NM_000558.5:c.270C>G	NP_000549.1:p.(H90Q)	VUS	B/LB	Missense codons	16:227102-227102	missense_variant	0.3	0.676563	0.882879	0.000167	0.013	0	0.954179	0.855736	0.617538	0.4122	0.804	0.694	0.5	0.57841			0.029	0.7436	2.22	1.22976	0.388393	-3.03		-4.71	14.35	0.183	0.947	0.962	0.984	12.2504	1.40831
661	NM_000517.4:c.272A>G	HBA2:c.272A>G	NM_000517.4:c.272A>G	NP_000508.1:p.(K91R)	VUS	VUS	Missense codons	16:223300-223300	missense_variant	0.07	0.676563	0.999887	4e-05	0.049	0	0.440609	0.989621		0.3956	0.951	0.684	0.583	0.87394			0.322	0.7265	4.22	1.79982	0.266283	-2.97	2.53	-1.46	19.15	1.47	1.196	0.865	0.318	12.555	1.78289
662	NM_000558.5:c.272A>G	HBA1:c.272A>G	NM_000558.5:c.272A>G	NP_000549.1:p.(K91R)	VUS	VUS	Missense codons	16:227104-227104	missense_variant	0.07	0.676563	0.999963	4e-05	0.049	0	0.861844	0.98642	0.79482	0.3651	0.951	0.711	0.634	0.44694			0.322	0.7564	1.96	1.32372	0.415802	-2.97		-1.46	16.78	1.081	1.207	0.988	0.99	6.5663	1.54299
663	NM_000558.5:c.272A>C	HBA1:c.272A>C	NM_000558.5:c.272A>C	NP_000549.1:p.(K91T)	VUS	P/LP	Missense codons	16:227104-227104	missense_variant	0.14	0.676563	0.999994	4e-05	0.271	0	0.955708	0.993374	0.854215	0.4642	0.946	0.785	0.623	0.42385			0.279	0.7911	1.96	1.327	0.457277	-3.21		-2.7	17.16	1.081	1.207	0.988	0.99	6.5663	1.54823
664	NM_000517.4:c.273G>T	HBA2:c.273G>T	NM_000517.4:c.273G>T	NP_000508.1:p.(K91N)	VUS	B/LB	Missense codons	16:223301-223301	missense_variant	0.33	0.676563	0.999931	4e-05	0.045	0	0.863422	0.98433		0.1618	0.972	0.517	0.588	0.51712			0.026	0.6895	2.05	1.20876	0.149598	-3.2	2.68	-1.46	16.26	-0.455	1.073	0.85	0.318	8.8684	1.15546
665	NM_000558.5:c.274C>T	HBA1:c.274C>T	NM_000558.5:c.274C>T	NP_000549.1:p.(L92F)	VUS	P/LP	Missense codons	16:227106-227106	missense_variant	0.01	0.676563	0.999996	1e-06	0.996	0	0.992267	0.997198	0.917308	0.8434	0.52	0.846	0.613	0.93308			0.867	0.8493	3.34	2.25279	0.467237	-3.3		-3.47	23.8	2.847	0.947	0.994	0.991	13.4488	2.5181
668	NM_000558.5:c.278G>A	HBA1:c.278G>A	NM_000558.5:c.278G>A	NP_000549.1:p.(R93Q)	VUS	P/LP	Missense codons	16:227110-227110	missense_variant	0.01	0.676563	0.998863	0	0.831	0	0.987709	0.998651	0.913709	0.8329	0.908	0.84	0.651	0.92919			0.722	0.8358	3.33	2.48519	0.454493	-3.16		-3.19	23.9	1.162	1.083	0.985	0.991	12.1135	2.77432
669	NM_000517.4:c.278G>T	HBA2:c.278G>T	NM_000517.4:c.278G>T	NP_000508.1:p.(R93L)	VUS	P/LP	Missense codons	16:223306-223306	missense_variant	0.02	0.676563	0.99938	5e-06	0.258	0	0.996088	0.995327		0.2979	0.93	0.681	0.725	0.89828			0.41	0.7156	2.19	1.53496	0.41679	-3.2	2.76	-5.58	21.5	4.202	0.151	0.642	0.334	8.8219	1.51413
670	NM_000517.4:c.278G>C	HBA2:c.278G>C	NM_000517.4:c.278G>C	NP_000508.1:p.(R93P)	VUS	VUS	Missense codons	16:223306-223306	missense_variant	0	0.676563	0.999416	5e-06	0.971	0	0.998856	0.986975		0.8638	0.82	0.819	0.687	0.88976			0.857	0.8828	2.19	2.74105	0.358209	-3.2	4.31	-5.69	23.4	4.202	0.151	0.642	0.334	8.8219	3.59393
672	NM_000558.5:c.281T>C	HBA1:c.281T>C	NM_000558.5:c.281T>C	NP_000549.1:p.(V94A)	VUS	P/LP	Missense codons	16:227113-227113	missense_variant	0.02	0.676563	0.999637	0	0.994	0	0.995177	0.994347	0.817618	0.7387	0.981	0.832	0.952	0.9492			0.835	0.8684	3.19	3.10728	0.540278	-3.9		-3.78	23.8	5.55	1.049	0.995	0.996	5.4614	3.17586
673	NM_000517.4:c.283G>T	HBA2:c.283G>T	NM_000517.4:c.283G>T	NP_000508.1:p.(D95Y)	VUS	B/LB	Missense codons	16:223311-223311	missense_variant	0	0.676563	1	0	1	0	0.999482	0.994085		1.1045	0.959	0.979	0.907	0.98742			0.945	0.9424	4.22	9.12508	0.536482	-3.37	4.705	-8.16	27.6	6.106	1.073	0.994	0.856	15.6564	11.2351
674	NM_000517.4:c.283G>A	HBA2:c.283G>A	NM_000517.4:c.283G>A	NP_000508.1:p.(D95N)	VUS	P/LP	Missense codons	16:223311-223311	missense_variant	0.01	0.676563	0.999998	0	0.879	0	0.997564	0.998524		1.1021	0.995	0.913	0.818	0.98634			0.748	0.9356	4.22	8.54801	0.21165	-3.32	3.665	-4.18	26.9	6.106	1.073	0.994	0.856	15.6564	10.3628
675	NM_000517.4:c.283G>C	HBA2:c.283G>C	NM_000517.4:c.283G>C	NP_000508.1:p.(D95H)	VUS	P/LP	Missense codons	16:223311-223311	missense_variant	0	0.676563	1	0	1	0	0.999436	0.994932		1.1045	0.993	0.975	0.714	0.98774			0.945	0.9424	4.22	9.12508	0.535437	-3.36	4.705	-6.21	26.9	6.106	1.073	0.994	0.856	15.6564	11.2351
676	NM_000517.4:c.284A>T	HBA2:c.284A>T	NM_000517.4:c.284A>T	NP_000508.1:p.(D95V)	VUS	VUS	Missense codons	16:223312-223312	missense_variant	0	0.676563	1	0	1	0	0.999886	0.993203		1.0056	0.939	0.936	0.868	0.98348			0.945	0.93	4.22	8.04724	0.555786	-3.34	4.705	-8.21	26.1	8.621	1.196	0.997	0.888	7.5143	10.0136
677	NM_000558.5:c.284A>C	HBA1:c.284A>C	NM_000558.5:c.284A>C	NP_000549.1:p.(D95A)	VUS	P/LP	Missense codons	16:227116-227116	missense_variant	0	0.676563	0.999994	0	0.999	0	0.996354	0.988031	0.963804	0.8235	0.989	0.912	0.91	0.97915			0.935	0.8448	4.31	4.49566	0.526088	-3.29		-7.26	25.1	8.439	1.207	0.998	0.998	9.3306	4.20677
678	NM_000558.5:c.284A>G	HBA1:c.284A>G	NM_000558.5:c.284A>G	NP_000549.1:p.(D95G)	VUS	P/LP	Missense codons	16:227116-227116	missense_variant	0	0.676563	0.999996	0	0.997	0.01	0.994726	0.997169	0.893511	0.8235	0.979	0.924	0.934	0.98319			0.911	0.8448	4.31	4.49566	0.52171	-3.33		-6.28	25.6	8.439	1.207	0.998	0.998	9.3306	4.20677
680	NM_000517.4:c.286C>G	HBA2:c.286C>G	NM_000517.4:c.286C>G	NP_000508.1:p.(P96A)	VUS	B/LB	Missense codons	16:223314-223314	missense_variant	0	0.582742	0.999998	0	0.999	0	0.998924	0.994636		1.0599	0.981	0.877	0.661	0.98211			0.935	0.913	4.22	7.40183	0.327165	-3.32	4.73	-7.61	25	7.3	0.938	0.998	0.921	15.6564	8.65016
681	NM_000558.5:c.286C>A	HBA1:c.286C>A	NM_000558.5:c.286C>A	NP_000549.1:p.(P96T)	VUS	P/LP	Missense codons	16:227118-227118	missense_variant	0	0.676563	0.999986	0	1	0	0.998828	0.995769	0.988801	0.8916	0.963	0.914	0.91	0.9735			0.945	0.8607	4.31	4.60273	0.433455	-3.43		-7.62	24.2	7.15	0.947	0.998	0.998	11.4073	4.28384
682	NM_000517.4:c.286C>T	HBA2:c.286C>T	NM_000517.4:c.286C>T	NP_000508.1:p.(P96S)	VUS	B/LB	Missense codons	16:223314-223314	missense_variant	0	0.582742	0.999999	0	1	0	0.99931	0.998618		1.0856	0.978	0.948	0.699	0.98103			0.945	0.9227	4.22	7.86461	0.499722	-3.39	4.385	-7.62	26	7.3	0.938	0.998	0.921	15.6564	9.44804
683	NM_000517.4:c.287C>T	HBA2:c.287C>T	NM_000517.4:c.287C>T	NP_000508.1:p.(P96L)	VUS	B/LB	Missense codons	16:223315-223315	missense_variant	0	0.582742	1	0	1	0	0.863696	0.998246		0.9453	0.987	0.845	0.656	0.93828			0.945	0.9072	3.26	4.98491	0.47307	-3.46	4.73	-9.52	25.3	3.671	0.938	0.997	0.93	9.4109	6.01441
684	NM_000558.5:c.287C>G	HBA1:c.287C>G	NM_000558.5:c.287C>G	NP_000549.1:p.(P96R)	VUS	P/LP	Missense codons	16:227119-227119	missense_variant	0.02	0.676563	0.999995	0	1	0	0.998828	0.996606	0.920308	0.8425	0.985	0.908	0.939	0.98033			0.883	0.8486	4.31	4.55748	0.521743	-3.44		-8.57	24.9	7.15	0.947	0.997	0.999	9.9173	4.25713
685	NM_000558.5:c.287C>A	HBA1:c.287C>A	NM_000558.5:c.287C>A	NP_000549.1:p.(P96Q)	VUS	P/LP	Missense codons	16:227119-227119	missense_variant	0	0.676563	0.99999	0	1	0.01	0.999215	0.989026	0.985426	0.8425	0.99	0.872	0.867	0.97996			0.945	0.8486	4.31	4.55748	0.521137	-3.43		-7.62	24.9	7.15	0.947	0.997	0.999	9.9173	4.25713
686	NM_000517.4:c.290T>A	HBA2:c.290T>A	NM_000517.4:c.290T>A	NP_000508.1:p.(V97D)	VUS	P/LP	Missense codons	16:223318-223318	missense_variant	0.02	0.582742	1	0.000153	0.125	0	0.975169	0.963891		0.0597	0.882	0.751	0.784	0.90979			0.394	0.5836	4.22	2.5226	0.392626	-3.04	1.97	-5.45	23.5	2.296	0.179	0.996	0.938	7.5143	2.30005
687	NM_000517.4:c.292A>C	HBA2:c.292A>C	NM_000517.4:c.292A>C	NP_000508.1:p.(N98H)	VUS	P/LP	Missense codons	16:223320-223320	missense_variant	0.02	0.582742	0.999982	0	1	0	0.999384	0.994833		0.9523	0.914	0.872	0.815	0.98441			0.883	0.9028	4.22	7.78745	0.253599	-3.24	4.365	-4.75	24.8	8.67	1.276	0.999	0.929	7.5143	9.31115
688	NM_000517.4:c.294C>A	HBA2:c.294C>A	NM_000517.4:c.294C>A	NP_000508.1:p.(N98K)	VUS	P/LP	Missense codons	16:223322-223322	missense_variant	0.01	0.582742	0.999985	0	0.999	0	0.99858	0.994526		1.0076	0.966	0.888	0.598	0.90584			0.896	0.9125	3.26	3.63736	0.201986	-3.29	4.71	-5.71	23.8	1.888	0.107	0.998	0.901	12.6013	4.50677
690	NM_000558.5:c.298A>G	HBA1:c.298A>G	NM_000558.5:c.298A>G	NP_000549.1:p.(K100E)	VUS	B/LB	Splice region variant; Missense codons	16:227130-227130	missense_variant,splice_region_variant	0	0.676563	0.999999	2e-06	0.117	0	0.993376	0.979608	0.838916	0.3555	0.94	0.846	0.632	0.87403	0.000254709	0.01	0.454	0.7698	1.85	4.84129	0.473711	-3.18		-3.34	21.9	3.604	1.286	1	0.989	4.4618	7.00651	0.894	9.31541
691	NM_000558.5:c.300G>T	HBA1:c.300G>T	NM_000558.5:c.300G>T	NP_000549.1:p.(K100N)	VUS	P/LP	Splice region variant; Missense codons	16:227132-227132	missense_variant,splice_region_variant	0	0.676563	1	2e-06	0.218	0	0.996217	0.994969	0.829317	0.4956	0.941	0.81	0.653	0.90318	0.999523	0.948	0.466	0.7754	2.3	5.36018	0.186703	-3.25		-4.38	25.9	0.771	1.153	0.998	0.97	5.1902	7.74827	4.399	45.8372
692	NM_000517.4:c.307A>C	HBA2:c.307A>C	NM_000517.4:c.307A>C	NP_000508.1:p.(S103R)	VUS	P/LP	Missense codons	16:223477-223477	missense_variant	0.03	0.59774	0.951342	0.05019	0.107	0	0.820582	0.991474		-0.0935	0.961	0.595	0.755	0.17044			0.373	0.6339	0.319	1.25273	0.323513	-3.08	3.72	-3.81	22.5	-0.811	1.28	0.977	0.899	4.2674	1.27681
693	NM_000558.5:c.309C>A	HBA1:c.309C>A	NM_000558.5:c.309C>A	NP_000549.1:p.(S103R)	VUS	P/LP	Missense codons	16:227290-227290	missense_variant	0.03	0.676563	0.983623	0.019344	0.107	0.01	0.741925	0.98846	0.665433	0.4949	0.961	0.74	0.75	0.36257			0.373	0.7536	2.44	1.81748	0.406438	-3.08		-3.81	20.2	-0.345	0.117	0.993	0.901	6.8141	2.04115
694	NM_000517.4:c.309C>A	HBA2:c.309C>A	NM_000517.4:c.309C>A	NP_000508.1:p.(S103R)	VUS	P/LP	Missense codons	16:223479-223479	missense_variant	0.03	0.59774	0.730068	0.05019	0.107	0.01	0.959018	0.992249		0.2544	0.961	0.628	0.755	0.23399			0.373	0.652	1.13	1.40249	0.392353	-3.08	3.72	-3.81	22.6	-0.877	0.111	0.99	0.951	6.3685	1.435
695	NM_000558.5:c.310C>T	HBA1:c.310C>T	NM_000558.5:c.310C>T	NP_000549.1:p.(H104Y)	VUS	B/LB	Missense codons	16:227291-227291	missense_variant	0	0.676563	0.999999	1e-06	0.989	0	0.996426	0.995267	0.873813	0.9503	0.967	0.936	0.616	0.97021			0.884	0.8675	4.45	4.20768	0.48906	-3.17		-4.9	24.6	3.365	1.01	0.997	0.921	16.4459	3.97609
696	NM_000517.4:c.310C>T	HBA2:c.310C>T	NM_000517.4:c.310C>T	NP_000508.1:p.(H104Y)	P/LP	P/LP	Missense codons	16:223480-223480	missense_variant	0	0.59774	0.99973	1.2e-05	0.989	0	0.995787	0.995756		0.942	0.967	0.925	0.642	0.94176			0.884	0.8816	4.24	6.47076	0.496521	-3.17	3.59	-4.9	26.4	5.357	1.002	0.995	0.965	11.012	7.21857
701	NM_000558.5:c.320T>C	HBA1:c.320T>C	NM_000558.5:c.320T>C	NP_000549.1:p.(L107P)	VUS	P/LP	Missense codons	16:227301-227301	missense_variant	0	0.676563	1	0.000491	0.999	0	0.996261	0.997169	0.853415	0.6639	0.763	0.893	0.908	0.9326			0.935	0.8416	2	2.41713	0.481816	-3.42		-5.18	24	0.939	1.12	1	0.988	9.2537	2.57376
707	NM_000517.4:c.335C>T	HBA2:c.335C>T	NM_000517.4:c.335C>T	NP_000508.1:p.(A112V)	VUS	P/LP	Missense codons	16:223505-223505	missense_variant	0.48	0.59774	1	0.184625	0	0	0.0465488	0.758512		-0.3281	0.821	0.503	0.502	0.02635			0.011	0.6389	-8.48	0.0336772	0.249886	-3.17	1.3	-0.88	0.037	-3.583	0.165	0.064	0.157	13.3593	0.0435028
708	NM_000558.5:c.337C>G	HBA1:c.337C>G	NM_000558.5:c.337C>G	NP_000549.1:p.(H113D)	VUS	B/LB	Missense codons	16:227318-227318	missense_variant	0	0.676563	0.999999	0.00035	0.681	0	0.973031	0.950073	0.407359	0.162	0.803	0.535	0.527	0.59842			0.688	0.7563	2.4	1.29845	0.285011	-3.21		-8.01	19.18	3.172	0.116	0.009	0.007	8.5136	1.57971
711	NM_000517.4:c.341T>G	HBA2:c.341T>G	NM_000517.4:c.341T>G	NP_000508.1:p.(L114R)	VUS	VUS	Missense codons	16:223511-223511	missense_variant	0.03	0.59774	1	0.457465	0.089	0	0.0974242	0.807632		-0.3984	0.85	0.542	0.337	0.09535			0.371	0.7216	-8.14	0.0501537	0.315305	-3.44	2.77	-1.06	6.403	-1.67	-0.589	0.022	0.096	10.9087	0.0774775
713	NM_000517.4:c.343C>T	HBA2:c.343C>T	NM_000517.4:c.343C>T	NP_000508.1:p.(P115S)	VUS	B/LB	Missense codons	16:223513-223513	missense_variant	0.03	0.59774	0.999989	9.8e-05	0.006	0	0.349777	0.913178		0.1095	0.519	0.463	0.257	0.21868			0.364	0.7359	1.7	0.744294	0.0968081	-3.15	2.31	-4.97	14.7	1.848	0.111	0.011	0.08	15.5228	0.761087
714	NM_000517.4:c.343C>A	HBA2:c.343C>A	NM_000517.4:c.343C>A	NP_000508.1:p.(P115T)	VUS	VUS	Missense codons	16:223513-223513	missense_variant	0.01	0.59774	0.999991	9.8e-05	0.132	0	0.986034	0.950878		0.2873	0.52	0.506	0.423	0.23662			0.417	0.7874	1.7	0.849715	0.26339	-3.19	2.985	-5.44	14.29	1.848	0.111	0.011	0.08	15.5228	0.951884
715	NM_000558.5:c.344C>T	HBA1:c.344C>T	NM_000558.5:c.344C>T	NP_000549.1:p.(P115L)	VUS	B/LB	Missense codons	16:227325-227325	missense_variant	0	0.676563	0.997087	6e-06	0.02	0	0.996814	0.957587	0.905809	0.2092	0.516	0.481	0.348	0.23582			0.446	0.7486	-0.956	0.815211	0.165952	-3.25		-7.44	14.7	0.028	1.012	0.001	0.004	9.908	1.03676
719	NM_000558.5:c.350A>C	HBA1:c.350A>C	NM_000558.5:c.350A>C	NP_000549.1:p.(E117A)	VUS	VUS	Missense codons	16:227331-227331	missense_variant	0.07	0.676563	1	0.015245	0.003	0	0.175551	0.88049	0.786321	-0.2619	0.423	0.564	0.141	0.71485			0.319	0.6331	4.34	1.68026	0.142196	-3.04		-3.18	15.26	1.702	1.311	0.003	0.015	6.2072	1.90998
720	NM_000558.5:c.349G>A	HBA1:c.349G>A	NM_000558.5:c.349G>A	NP_000549.1:p.(E117K)	VUS	B/LB	Missense codons	16:227330-227330	missense_variant	0.03	0.676563	1	0.015245	0.005	0	0.868973	0.991953	0.607039	0.2962	0.77	0.673	0.483	0.79654			0.364	0.7995	3.34	1.7352	0.30258	-3.14		-2.41	17.84	4.817	-0.13	0.001	0.006	13.3656	2.06608
722	NM_000517.4:c.352T>A	HBA2:c.352T>A	NM_000517.4:c.352T>A	NP_000508.1:p.(F118I)	VUS	P/LP	Missense codons	16:223522-223522	missense_variant	0	0.59774	0.993027	5e-06	0.474	0	0.988478	0.98551		0.9151	0.626	0.809	0.638	0.84075			0.601	0.8804	4.07	3.22696	0.385369	-3.33	3.805	-3.67	23.9	1.708	0.193	0.015	0.283	8.7778	4.03396
723	NC_000016.9:g.227330_227338dup	HBA1:c.349_357dup	NM_000558.5:c.349_357dup	NP_000549.1:p.(E117_T119dup)	P/LP	P/LP	Inframe indels	16:227338-227338	inframe_insertion
724	NC_000016.9:g.227334_227336dup	HBA1:c.354_355insATC	NM_000558.5:c.354_355insATC	NP_000549.1:p.(F118_T119insI)	VUS	P/LP	Inframe indels	16:227336-227336	inframe_insertion
726	NM_000558.5:c.359C>T	HBA1:c.359C>T	NM_000558.5:c.359C>T	NP_000549.1:p.(P120L)	VUS	P/LP	Missense codons	16:227340-227340	missense_variant	0	0.676563	1	0	0.779	0	0.997503	0.997141	0.981802	0.8862	0.76	0.748	0.738	0.95452			0.736	0.8595	4.17	2.61109	0.349432	-3.34		-7.99	23.5	7.013	1.023	0.919	0.732	11.1677	2.91612
727	NM_000517.4:c.362C>A	HBA2:c.362C>A	NM_000517.4:c.362C>A	NP_000508.1:p.(A121E)	VUS	B/LB	Missense codons	16:223532-223532	missense_variant	1	0.59774	0.93677	0.006239	0.009	0	0.323762	0.956397		-0.6227	0.914	0.513	0.494	0.10741			0.001	0.3453	1.86	0.501292	0.307874	-2.91	-0.345	1.94	14.19	0.083	-0.318	0.005	0.565	11.0225	0.313094
728	NM_000558.5:c.364G>A	HBA1:c.364G>A	NM_000558.5:c.364G>A	NP_000549.1:p.(V122M)	VUS	B/LB	Missense codons	16:227345-227345	missense_variant	0.19	0.549168	0.999972	0.027832	0.12	0	0.0561066	0.977496	0.865813	0.2687	0.572	0.501	0.143	0.31002			0.059	0.7883	0.938	1.13835	-0.130759	-3.31		-1.22	12.67	0.336	1.172	0.875	0.782	9.5509	1.37089
729	NM_000558.5:c.367C>T	HBA1:c.367C>T	NM_000558.5:c.367C>T	NP_000549.1:p.(H123Y)	VUS	VUS	Missense codons	16:227348-227348	missense_variant	0	0.549168	0.999827	0	0.858	0	0.998135	0.992913	0.860614	0.7663	0.754	0.734	0.687	0.90254			0.776	0.8195	4.17	2.65301	0.244326	-3.17		-4.94	22.8	5.331	1.023	0.844	0.785	9.6771	2.95025
730	NM_000517.4:c.369C>G	HBA2:c.369C>G	NM_000517.4:c.369C>G	NP_000508.1:p.(H123Q)	VUS	B/LB	Missense codons	16:223539-223539	missense_variant	0.22	0.676563	0.953342	0	0.709	0	0.292282	0.968888		0.4719	0.883	0.618	0.409	0.19967			0.298	0.6638	-8.48	0.228427	0.0731639	-3.09	1.365	-5.74	9.591	-1.375	-0.223	0.02	0.473	14.2778	0.372685
731	NM_000517.4:c.370G>A	HBA2:c.370G>A	NM_000517.4:c.370G>A	NP_000508.1:p.(A124T)	VUS	VUS	Missense codons	16:223540-223540	missense_variant	0.03	0.676563	0.987509	0.002068	0.148	0	0.990128	0.998132		0.7287	0.807	0.661	0.34	0.4244			0.378	0.7542	4.24	2.25231	0.263698	-3.27	3.44	-2.99	23.4	1.061	0.215	0.023	0.469	12.4779	2.63991
733	NM_000558.5:c.370G>T	HBA1:c.370G>T	NM_000558.5:c.370G>T	NP_000549.1:p.(A124S)	VUS	VUS	Missense codons	16:227351-227351	missense_variant	0.05	0.549168	0.904118	0.001248	0.036	0	0.856668	0.973346	0.865113	0.781	0.912	0.744	0.279	0.87804			0.347	0.7912	3.18	1.99272	0.299762	-3.25		-2.37	14.76	2.74	1.172	0.779	0.781	8.5284	2.3011
734	NM_000517.4:c.373T>C	HBA2:c.373T>C	NM_000517.4:c.373T>C	NP_000508.1:p.(S125P)	VUS	VUS	Missense codons	16:223543-223543	missense_variant	0.02	0.676563	0.968454	0.000297	0.88	0	0.996464	0.997324		0.8613	0.702	0.75	0.721	0.14068			0.726	0.8721	1.68	2.08044	0.324768	-3.29	3.74	-3.65	24.4	-0.778	0.198	0.041	0.437	6.5242	2.87901
736	NM_000517.4:c.377T>A	HBA2:c.377T>A	NM_000517.4:c.377T>A	NP_000508.1:p.(L126Q)	VUS	B/LB	Missense codons	16:223547-223547	missense_variant	0.01	0.676563	0.999536	0.00402	0.98	0.01	0.99577	0.99513		0.6963	0.944	0.859	0.82	0.8237			0.83	0.8562	3.1	3.53428	0.496993	-3.24	3.665	-3.81	25.1	2.784	1.126	0.587	0.421	5.1017	4.27136
738	NM_000558.5:c.379G>C	HBA1:c.379G>C	NM_000558.5:c.379G>C	NP_000549.1:p.(D127H)	VUS	P/LP	Missense codons	16:227360-227360	missense_variant	0	0.549168	0.999999	0	0.995	0	0.998602	0.991958	0.885311	0.8859	0.958	0.906	0.858	0.89817			0.902	0.8692	3.2	2.71116	0.48511	-3.26		-6.49	23.9	3.846	1.172	0.827	0.82	13.2023	2.94111
740	NM_000558.5:c.379G>A	HBA1:c.379G>A	NM_000558.5:c.379G>A	NP_000549.1:p.(D127N)	VUS	P/LP	Missense codons	16:227360-227360	missense_variant	0.01	0.549168	0.999994	0	0.73	0	0.997139	0.998163	0.925008	0.8288	0.949	0.749	0.727	0.95421			0.672	0.8463	3.2	2.71116	0.16368	-3.21		-4.66	23.8	3.846	1.172	0.827	0.82	13.2023	2.94111
741	NM_000517.4:c.380A>G	HBA2:c.380A>G	NM_000517.4:c.380A>G	NP_000508.1:p.(D127G)	VUS	P/LP	Missense codons	16:223550-223550	missense_variant	0	0.676563	1	0	0.991	0	0.999169	0.998258		1.0446	0.955	0.953	0.723	0.86858			0.889	0.9162	4.24	6.58227	0.539729	-3.19	4.325	-6.51	28.5	8.378	1.297	0.95	0.414	12.5712	8.03649
743	NM_000558.5:c.381C>G	HBA1:c.381C>G	NM_000558.5:c.381C>G	NP_000549.1:p.(D127E)	VUS	VUS	Missense codons	16:227362-227362	missense_variant	0.02	0.549168	0.999942	0	0.92	0	0.996704	0.994449	0.847215	0.5401	0.851	0.857	0.29	0.87959			0.754	0.7996	2.16	2.18967	0.270852	-3.18		-3.73	22.9	1.023	1.023	0.92	0.867	7.8157	2.42225
749	NM_000558.5:c.392C>T	HBA1:c.392C>T	NM_000558.5:c.392C>T	NP_000549.1:p.(A131V)	VUS	P/LP	Missense codons	16:227373-227373	missense_variant	0.05	0.549168	1	0.69968	0.005	0	0.961816	0.986385	0.880812	0.293	0.55	0.545	0.32	0.25843			0.345	0.8135	-2.84	0.738419	0.12934	-3.27		-2.8	14.07	-0.724	1.023	0.001	0.783	14.012	0.951862
750	NM_000517.4:c.392C>A	HBA2:c.392C>A	NM_000517.4:c.392C>A	NP_000508.1:p.(A131D)	VUS	P/LP	Missense codons	16:223562-223562	missense_variant	0.07	0.676563	1	0.553482	0.005	0	0.520513	0.934155		0.0451	0.695	0.585	0.591	0.10265			0.319	0.8034	-1.07	0.569555	0.363219	-3.1	3.175	-2.88	12.28	0.646	1.015	0.049	0.021	17.6751	0.636896
752	NM_000558.5:c.395C>T	HBA1:c.395C>T	NM_000558.5:c.395C>T	NP_000549.1:p.(S132F)	P/LP	P/LP	Missense codons	16:227376-227376	missense_variant	0.07	0.549168	1	0.274302	0.491	0	0.692339	0.985274	0.666133	-0.1982	0.692	0.504	0.296	0.19505			0.483	0.6313	-8.35	0.430489	0.121388	-3.09		-2.28	13.01	-0.901	0.101	0.013	0.848	2.1262	0.654501
753	NM_000558.5:c.396delT	HBA1:c.396delT	NM_000558.5:c.396delT	NP_000549.1:p.(V133*)	VUS	VUS	Stop gained	16:227376-227377	frameshift_variant						0																			15.94
757	NM_000517.4:c.400A>C	NM_000517.4:c.400A>C	NM_000517.4:c.400A>C	NP_000508.1:p.(S134R)	VUS	B/LB	Missense codons	16:223570-223570	missense_variant	0	0.676563	0.996096	0.005105	0.636	0	0.983667	0.996282		0.4059	0.909	0.711	0.631	0.4573			0.667	0.8026	-1.15	1.69184	0.454267	-3.15	3.785	-3.66	23.2	0.144	0.314	0.781	0.37	2.7769	2.40836
758	NM_000517.4:c.403A>G	HBA2:c.403A>G	NM_000517.4:c.403A>G	NP_000508.1:p.(T135A)	P/LP	VUS	Missense codons	16:223573-223573	missense_variant	0.67	0.676563	0.641654	0.007298	0.005	0	0.283033	0.955733		-0.2472	0.389	0.426	0.228	0.24067			0.003	0.5434	2.17	0.653999	0.126252	-3.03	1.765	-1.8	13.57	-0.039	1.297	0.829	0.423	6.8698	0.458731
760	NM_000558.5:c.404delC	HBA1:c.404delC	NM_000558.5:c.404delC	NP_000549.1:p.(V136Cfs*2)	VUS	VUS	Frameshift	16:227384-227385	frameshift_variant						0																			25.1
761	NM_000517.4:c.406G>C	HBA2:c.406G>C	NM_000517.4:c.406G>C	NP_000508.1:p.(V136L)	VUS	VUS	Missense codons	16:223576-223576	missense_variant	0.03	0.676563	0.999393	5e-06	0.015	0	0.98059	0.984685		0.253	0.672	0.666	0.451	0.95189			0.365	0.7152	3.47	2.19959	0.283474	-3.14	2.85	-2.11	22.6	3.945	0.218	0.822	0.628	9.7693	2.10276
762	NM_000558.5:c.406G>A	HBA1:c.406G>A	NM_000558.5:c.406G>A	NP_000549.1:p.(V136M)	VUS	VUS	Missense codons	16:227387-227387	missense_variant	0.02	0.549168	0.982828	3e-06	0.12	0	0.997013	0.993634	0.90401	0.2596	0.628	0.553	0.196	0.88886			0.393	0.7514	0.848	1.87852	0.156931	-3.23		-1.88	17.87	4.132	0.242	0.999	0.997	2.6931	2.18803
764	NM_000517.4:c.409C>A	HBA2:c.409C>A	NM_000517.4:c.409C>A	NP_000508.1:p.(L137M)	VUS	B/LB	Missense codons	16:223579-223579	missense_variant	0.01	0.676563	0.994358	2e-06	0.999	0	0.861884	0.993355		0.9574		0.771	0.686	0.77198			0.896	0.9339	2.41	2.86955	0.184472	-3.84	3.81	-1.88	23.3	1.65	0.123	0.833	0.761	6.6741	3.70632
767	NM_000558.5:c.412A>C	HBA1:c.412A>C	NM_000558.5:c.412A>C	NP_000549.1:p.(T138P)	VUS	VUS	Missense codons	16:227393-227393	missense_variant	0	0.549168	0.999313	0.001072	0.493	0	0.996691	0.955094	0.928907	0.3546	0.527	0.76	0.426	0.76707			0.609	0.7698	1.67	1.65747	0.277311	-3.18		-4.35	21.5	0.043	0.312	0.982	0.999	4.6748	1.90011
769	NM_000558.5:c.416C>G	HBA1:c.416C>G	NM_000558.5:c.416C>G	NP_000549.1:p.(S139C)	VUS	VUS	Missense codons	16:227397-227397	missense_variant	0	0.549168	0.912561	0.002056	0.974	0	0.993528	0.981459	0.953905	0.8839	0.594	0.658	0.383	0.90138			0.861	0.8505	3.11	2.05032	0.202172	-3.31		-3.86	22.6	1.324	0.072	0.969	0.999	10.4569	2.33323
770	NM_000517.4:c.416C>T	HBA2:c.416C>T	NM_000517.4:c.416C>T	NP_000508.1:p.(S139F)	VUS	VUS	Missense codons	16:223586-223586	missense_variant	0	0.676563	0.989997	0.028227	0.959	0	0.996401	0.997543		1.0344	0.794	0.77	0.717	0.57047			0.847	0.9131	4.43	3.8738	0.423772	-3.31	3.92	-4.45	25.6	1.284	0.123	0.96	0.931	11.2346	4.79561
771	NM_000558.5:c.418A>G	HBA1:c.418A>G	NM_000558.5:c.418A>G	NP_000549.1:p.(K140E)	VUS	P/LP	Missense codons	16:227399-227399	missense_variant	0.01	0.549168	0.999929	0	0.76	0	0.996084	0.985029	0.89551	0.3292	0.881	0.726	0.71	0.92844			0.687	0.7654	1.51	1.83969	0.285897	-3.21		-3.31	22.5	3.43	0.229	0.949	0.998	4.3892	2.14529
772	NM_000517.4:c.418A>G	HBA2:c.418A>G	NM_000517.4:c.418A>G	NP_000508.1:p.(K140E)	VUS	P/LP	Missense codons	16:223588-223588	missense_variant	0.01	0.676563	0.999998	0	0.76	0	0.994283	0.99818		0.8635	0.881	0.942	0.77	0.97993			0.687	0.8475	4.43	6.14365	0.490473	-3.21	3.305	-3.31	25.7	4.207	1.215	0.964	0.941	11.4713	6.56636
774	NM_000517.4:c.420A>C	HBA2:c.420A>C	NM_000517.4:c.420A>C	NP_000508.1:p.(K140N)	VUS	VUS	Missense codons	16:223590-223590	missense_variant	0	0.676563	0.999956	0	0.932	0	0.99885	0.997639		0.8557	0.831	0.818	0.682	0.83189			0.823	0.8865	-2.32	2.44086	0.192135	-3.25	3.71	-4.25	23.7	0.418	0.037	0.94	0.949	11.7458	3.32513
775	NM_000517.4:c.420delA	HBA2:c.420delA	NM_000517.4:c.420delA	NP_000508.1:p.(K140Nfs*35)	VUS	VUS	Frameshift	16:223589-223590	frameshift_variant						0
777	NM_000517.4:c.423C>A	HBA2:c.423C>A	NM_000517.4:c.423C>A	NP_000508.1:p.(Y141*)	VUS	P/LP	Stop gained	16:223593-223593	stop_gained		0.59774	0.999691	0		0		0.996516					0.802	0.93497					2.4	3.86878	0.58478				36	2.036	1.017	0.854	0.939	7.1282	5.20161
779	NM_000558.5:c.424C>A	HBA2:c.424C>G	NM_000517.4:c.424C>G	NP_000508.1:p.(R142G)	VUS	B/LB	Missense codons	16:227405-227405	missense_variant	0	0.59774	0.999415	0	1	0	0.995915	0.986001	0.992151	0.7168	0.785	0.758	0.681	0.88285			0.945	0.8504	2.96	1.89702	0.25734	-3.43	3.94	-5.05	23.2	0.339	0.136	0.834	0.975	6.521	2.17645
780	NM_000517.4:c.424C>T	HBA2:c.424C>T	NM_000517.4:c.424C>T	NP_000508.1:p.(R142C)	VUS	P/LP	Missense codons	16:223594-223594	missense_variant	0	0.59774	0.999986	0	1	0	0.997025	0.998729		0.8809	0.911	0.816	0.792	0.82561			0.945	0.9273	2.46	3.88027	0.459876	-3.48	3.74	-6.58	25.6	0.32	1.017	0.691	0.93	5.0358	4.97607
781	NM_000517.4:c.425G>C	HBA2:c.425G>C	NM_000517.4:c.425G>C	NP_000508.1:p.(R142P)	VUS	P/LP	Missense codons	16:223595-223595	missense_variant	0	0.59774	0.998948	0	1	0	0.998914	0.994283		0.9377	0.798	0.843	0.744	0.94014			0.945	0.9311	2.4	3.8963	0.418492	-3.46	3.94	-5.62	24.4	4.826	-0.11	0.275	0.916	7.3381	4.88835
790	NM_000518.4:c.4G>A	HBB:c.4G>A	NM_000518.4:c.4G>A	NP_000509.1:p.(V2M)	VUS	P/LP	Missense codons	11:5248248-5248248	missense_variant	0	0.487112	0.999997		0.864	0	0.878573	0.992638	0.909909	0.5876	0.708	0.82	0.877	0.96862			0.779	0.7599	4.21	3.42986	0.343049	-2.82	1.46	-1.96	22.7	3.936	0.108	0.531	0.204	12.9328	3.83153
791	NM_000518.4:c.4G>T	HBB:c.4G>T	NM_000518.4:c.4G>T	NP_000509.1:p.(V2L)	VUS	VUS	Missense codons	11:5248248-5248248	missense_variant	0.01	0.487112	0.999997		0.053	0	0.512032	0.974513	0.875412	0.1889	0.669	0.719	0.865	0.96676			0.409	0.6228	4.21	2.18037	0.334401	-2.26	3.285	-2.06	18.65	3.936	0.108	0.531	0.204	12.9328	2.0979
792	NM_000518.4:c.5T>G	HBB:c.5T>G	NM_000518.4:c.5T>G	NP_000509.1:p.(V2G)	VUS	VUS	Missense codons	11:5248247-5248247	missense_variant	0.04	0.487112	1		0.27	0.01	0.444846	0.911993	0.70273	0.1758	0.66	0.644	0.522	0.94257			0.378	0.6361	3.98	1.99284	0.299899	-2.85	3.14	-4.38	19.55	4.956	0.283	0.346	0.146	10.207	2.01026
793	NM_000518.4:c.5T>C	HBB:c.5T>C	NM_000518.4:c.5T>C	NP_000509.1:p.(V2A)	VUS	VUS	Missense codons	11:5248247-5248247	missense_variant	0.02	0.487112	0.999988		0.81	0	0.783971	0.959738	0.784922	0.5415	0.705	0.794	0.874	0.95942			0.688	0.7481	3.98	2.73543	0.409007	-2.82	3.375	-2.51	22.5	4.956	0.283	0.346	0.146	10.207	3.12958
794	NM_000518.4:c.5T>A	HBB:c.5T>A	NM_000518.4:c.5T>A	NP_000509.1:p.(V2E)	VUS	VUS	Missense codons	11:5248247-5248247	missense_variant	0	0.487112	0.999999		0.825		0.986386	0.960349	0.79772	0.6667	0.656	0.786	0.682	0.96327			0.757	0.7869	3.98	3.01816	0.296727	-2.85	4.18	-3.87	22.8	4.956	0.283	0.346	0.146	10.207	3.57001
795	NM_000518.4:c.7C>T	HBB:c.7C>T	NM_000518.4:c.7C>T	NP_000509.1:p.(H3Y)	VUS	VUS	Missense codons	11:5248245-5248245	missense_variant	0.01	0.487112	0.864759		0.027	0	0.297505	0.961101	0.818818	0.1539	0.571	0.592	0.863	0.8515			0.407	0.6675	1.05	1.19194	0.365423	-2.55	3.565	-4.02	14.78	1.045	-0.646	0.026	0.069	8.6579	1.20379
796	NM_000518.4:c.8A>C	HBB:c.8A>C	NM_000518.4:c.8A>C	NP_000509.1:p.(H3P)	VUS	P/LP	Missense codons	11:5248244-5248244	missense_variant	0.01	0.487112	0.979312		0.757	0.03	0.84248	0.931221	0.878012	0.6452	0.544	0.64	0.593	0.92598			0.685	0.7709	3.98	1.98421	0.379614	-2.55	3.22	-6.54	20.8	2.619	0.2	0.015	0.046	10.6674	2.33453
797	NM_000518.4:c.8A>T	HBB:c.8A>T	NM_000518.4:c.8A>T	NP_000509.1:p.(H3L)	VUS	VUS	Missense codons	11:5248244-5248244	missense_variant	0.03	0.487112	0.980996		0.018		0.442025	0.866087	0.714029	0.2915	0.375	0.457	0.604	0.89425			0.365	0.6912	3.98	1.50408	0.218661	-2.54	3.215	-7.17	16.38	2.619	0.2	0.015	0.046	10.6674	1.50444
799	NM_000518.4:c.8A>G	HBB:c.8A>G	NM_000518.4:c.8A>G	NP_000509.1:p.(H3R)	VUS	P/LP	Missense codons	11:5248244-5248244	missense_variant	0.06	0.487112	0.912275		0.018	0	0.297418	0.879666	0.785921	0.2856	0.559	0.545	0.85	0.94096			0.323	0.665	3.98	1.45768	0.338093	-2.53	3.365	-4.69	12.07	2.619	0.2	0.015	0.046	10.6674	1.41948
800	NM_000518.4:c.9T>A	HBB:c.9T>A	NM_000518.4:c.9T>A	NP_000509.1:p.(H3Q)	VUS	B/LB	Missense codons	11:5248243-5248243	missense_variant	0.12	0.487112	0.750046		0.031		0.184278	0.949362	0.710429	-0.5428	0.313	0.482	0.635	0.28824			0.262	0.6111	-6.49	0.0593322	0.138079	-2.54	2.165	-4.68	0.217	-0.886	-2.258	0.005	0.034	13.9608	0.0712957
800	NM_000518.4:c.9T>G	HBB:c.9T>G	NM_000518.4:c.9T>G	NP_000509.1:p.(H3Q)	VUS	B/LB	Missense codons	11:5248243-5248243	missense_variant	0.12	0.487112	0.750046		0.031	0.01	0.570641	0.951713	0.710429	-0.5428	0.313	0.482	0.635	0.13065			0.262	0.6111	-6.49	0.0593322	0.138053	-2.54	2.165	-4.68	0.227	-0.886	-2.258	0.005	0.034	13.9608	0.0712957
802	NM_000518.4:c.10C>G	HBB:c.10C>G	NM_000518.4:c.10C>G	NP_000509.1:p.(L4V)	VUS	VUS	Missense codons	11:5248242-5248242	missense_variant	0.02	0.487112	0.959641		0.027		0.452899	0.979853	0.830117	-0.1029	0.591	0.55	0.817	0.89194			0.385	0.6122	3.33	1.82212	0.313472	-2.34	3.595	-1.51	15.7	3.042	1.175	0.028	0.051	6.5064	1.9262
803	NM_000518.4:c.11T>A	HBB:c.11T>A	NM_000518.4:c.11T>A	NP_000509.1:p.(L4Q)	VUS	VUS	Missense codons	11:5248241-5248241	missense_variant	0	0.487112	0.876246		0.885		0.980509	0.994221	0.961604	0.9831	0.602	0.662	0.587	0.93338			0.79	0.8265	5.24	4.73122	0.423742	-2.42	4.29	-2.59	23.1	4.729	1.311	0.034	0.059	11.0579	5.8902
804	NM_000518.4:c.14C>A	HBB:c.14C>A	NM_000518.4:c.14C>A	NP_000509.1:p.(T5N)	VUS	VUS	Missense codons	11:5248238-5248238	missense_variant	0.01	0.487112	1		0.488	0	0.669219	0.934407	0.873013	0.0939	0.528	0.483	0.788	0.40722			0.568	0.7165	-1.7	0.897131	0.106202	-2.57	3.45	-3.4	13.65	0.179	0.216	0.022	0.056	20.759	1.19187
805	NM_000518.4:c.16C>T	HBB:c.16C>T	NM_000518.4:c.16C>T	NP_000509.1:p.(P6S)	VUS	VUS	Missense codons	11:5248236-5248236	missense_variant	0.42	0.487112	1		0	0	0.0396882	0.555049	0.475152	-0.7101		0.44	0.403	0.18152			0.014	0.3717	-0.45	0.224797	0.196754	-2.24	0.975	0.96	0.208	0.674	-1.994	0	0.021	7.2967	0.178666
806	NM_000518.4:c.16C>G	HBB:c.16C>G	NM_000518.4:c.16C>G	NP_000509.1:p.(P6A)	VUS	VUS	Missense codons	11:5248236-5248236	missense_variant	1	0.487112	1		0		0.048292	0.497971	0.653935	-0.8101	0.61	0.464	0.369	0.00475			0	0.2013	-0.45	0.0872944	0.111711	-2.18	-0.985	1.94	0.003	0.674	-1.994	0	0.021	7.2967	0.0443494
807	NM_000518.4:c.17C>G	HBB:c.17C>G	NM_000518.4:c.17C>G	NP_000509.1:p.(P6R)	P/LP	VUS	Missense codons	11:5248235-5248235	missense_variant	0.28	0.487112	1		0.097		0.1258	0.555298	0.928807	-0.486	0.627	0.505	0.414	0.08368			0.039	0.5365	-10.5	0.0348601	0.263893	-2.27	2.56	-0.64	0.001	-1.427	-0.684	0.001	0.019	21.0507	0.0565192
810	NM_000518.4:c.19G>A	HBB:c.19G>A	NM_000518.4:c.19G>A	NP_000509.1:p.(E7K)	VUS	B/LB	Missense codons	11:5248233-5248233	missense_variant	0.1	0.487112	1		0.017	0	0.0460324	0.992457	0.940706	-0.3836		0.45	0.827	0.50386			0.287	0.4121	5.24	1.34346	-0.173696	-2.47	2.325	-2.57	15.53	2.632	1.025	0.005	0.017	17.9125	1.28256
813	NM_000518.4:c.19G>C	HBB:c.19G>C	NM_000518.4:c.19G>C	NP_000509.1:p.(E7Q)	P/LP	VUS	Missense codons	11:5248233-5248233	missense_variant	0.1	0.487112	1		0.021		0.226615	0.978579	0.889011	-0.227	0.362	0.443	0.813	0.42348			0.287	0.6031	5.24	1.38048	0.306518	-2.49	2.345	-2.02	13.39	2.632	1.025	0.005	0.017	17.9125	1.34876
824	NM_000518.4:c.20A>T	HBB:c.20A>T	NM_000518.4:c.20A>T	NP_000509.1:p.(E7V)	VUS	P/LP	Missense codons	11:5248232-5248232	missense_variant	0.01	0.487112	1		0.007		0.0486261	0.959863	0.60064	-0.5961		0.535	0.537	0.40197			0.406	0.0719	0.149	0.691618	-0.182063	-2.47	3.625	-4.85	13.88	0.69	0.141	0.003	0.012	8.3887	0.741419
826	NM_000518.4:c.20A>C	HBB:c.20A>C	NM_000518.4:c.20A>C	NP_000509.1:p.(E7A)	VUS	B/LB	Missense codons	11:5248232-5248232	missense_variant	0.29	0.487112	1		0.006	0	0.0773684	0.799749	0.834817	-0.5967	0.418	0.504	0.786	0.19057			0.029	0.4593	0.149	0.496727	0.217282	-2.48	1.305	-3.69	7.332	0.69	0.141	0.003	0.012	8.3887	0.444187
827	NM_000518.4:c.20A>G	HBB:c.20A>G	NM_000518.4:c.20A>G	NP_000509.1:p.(E7G)	VUS	VUS	Missense codons	11:5248232-5248232	missense_variant	0.05	0.487112	1		0.009	0.01	0.267997	0.974372	0.784422	-0.4075	0.337	0.472	0.604	0.29928			0.346	0.5292	0.149	0.587548	0.141393	-2.5	2.62	-4.71	14.84	0.69	0.141	0.003	0.012	8.3887	0.566733
828	NM_000518.4:c.22_24delGAG	HBB:c.22_24delGAG	NM_000518.4:c.22_24delGAG	NP_000509.1:p.(E8del)	VUS	P/LP	Inframe indels	11:5248227-5248230	inframe_deletion						0																			17.37
829	NM_000518.4:c.22G>A	HBB:c.22G>A	NM_000518.4:c.22G>A	NP_000509.1:p.(E8K)	VUS	VUS	Missense codons	11:5248230-5248230	missense_variant	0.01	0.487112	1		0.728	0	0.99243	0.998968	0.963604	1.0123	0.507	0.739	0.593	0.9811			0.671	0.8897	5.24	6.46943	0.460785	-3.31	3.97	-3.27	24.4	5.337	1.025	0.014	0.003	17.9125	7.4016
830	NM_000518.4:c.23A>G	HBB:c.23A>G	NM_000518.4:c.23A>G	NP_000509.1:p.(E8G)	VUS	B/LB	Missense codons	11:5248229-5248229	missense_variant	0	0.487112	1		0.69	0	0.965238	0.999145	0.978702	0.9451	0.792	0.83	0.929	0.98131			0.692	0.8626	5.24	5.3849	0.348089	-3.34	3.165	-5.66	25.1	7.127	1.137	0.019	0.004	14.3909	6.00211
831	NM_000518.4:c.25A>C	HBB:c.25A>C	NM_000518.4:c.25A>C	NP_000509.1:p.(K9Q)	VUS	VUS	Missense codons	11:5248227-5248227	missense_variant	0	0.487112	0.958826		0.882	0	0.980795	0.989507	0.943806	0.9407	0.385	0.569	0.684	0.77622			0.789	0.834	5.24	5.21403	0.237902	-2.52	4.435	-3.19	23.5	4.2	1.137	0.017	0.003	14.3909	6.00462
832	NM_000518.4:c.25A>G	HBB:c.25A>G	NM_000518.4:c.25A>G	NP_000509.1:p.(K9E)	VUS	VUS	Missense codons	11:5248227-5248227	missense_variant	0.02	0.487112	0.973458		0.432	0	0.712371	0.998191	0.789121	0.588	0.42	0.603	0.668	0.94681			0.524	0.7348	5.24	3.34034	0.272946	-2.52	3.885	-3.25	22.4	4.2	1.137	0.017	0.003	14.3909	3.35022
833	NM_000518.4:c.26A>C	HBB:c.26A>C	NM_000518.4:c.26A>C	NP_000509.1:p.(K9T)	VUS	VUS	Missense codons	11:5248226-5248226	missense_variant	0.01	0.487112	0.96889		0.809	0.01	1	0.996368	0.853215	0.8479	0.692	0.694	0.837	0.93111			0.71	0.8355	4.11	2.78968	0.393363	-2.52	4.435	-4.83	22.5	3.079	0.204	0.01	0.001	10.3896	3.36474
834	NM_000518.4:c.26A>T	HBB:c.26A>T	NM_000518.4:c.26A>T	NP_000509.1:p.(K9M)	VUS	VUS	Missense codons	11:5248226-5248226	missense_variant	0.02	0.487112	0.985905		0.889		0.959273	0.991444	0.936406	0.7679	0.555	0.717	0.684	0.88547			0.732	0.814	4.11	2.94078	0.26692	-2.53	4.09	-4.75	22.9	3.079	0.204	0.01	0.001	10.3896	3.57137
835	NM_000518.4:c.26A>G	HBB:c.26A>G	NM_000518.4:c.26A>G	NP_000509.1:p.(K9R)	VUS	VUS	Missense codons	11:5248226-5248226	missense_variant	0.47	0.487112	0.84824		0.432	0.02	0.72253	0.997847	0.875312	0.3472	0.691	0.665	0.806	0.77722			0.152	0.6447	4.11	1.76102	0.328993	-2.49	2.26	-2.27	15.45	3.079	0.204	0.01	0.001	10.3896	1.69564
836	NM_000518.4:c.27G>C	HBB:c.27G>C	NM_000518.4:c.27G>C	NP_000509.1:p.(K9N)	VUS	B/LB	Missense codons	11:5248225-5248225	missense_variant	0.01	0.487112	0.866481		0.615		0.923712	0.993582	0.665633	0.5979	0.525	0.472	0.689	0.6682			0.619	0.7491	3.37	1.66144	0.129326	-2.53	3.535	-4.06	20.2	3.531	-0.238	0.002	0	6.1636	1.85129
837	NM_000518.4:c.29C>A	HBB:c.29C>A	NM_000518.4:c.29C>A	NP_000509.1:p.(S10Y)	VUS	VUS	Missense codons	11:5248223-5248223	missense_variant	0	0.487112	1		0.888	0	0.585552	0.836278	0.892111	0.4778	0.37	0.566	0.858	0.06197			0.792	0.7456	-7.04	0.0290382	0.285191	-2.37	2.87	-2.01	0.84	-1.312	-2.113	0	0	12.3349	0.0458419
838	NM_000518.4:c.29C>G	HBB:c.29C>G	NM_000518.4:c.29C>G	NP_000509.1:p.(S10C)	VUS	VUS	Missense codons	11:5248223-5248223	missense_variant	0.01	0.487112	1		0.143		0.931886	0.779831	0.453855	-0.4634	0.392	0.527	0.826	0.12358			0.418	0.5354	-7.04	0.00961967	0.266157	-2.37	2.32	-1.94	0.008	-1.312	-2.113	0	0	12.3349	0.010088
840	NM_000518.4:c.31G>A	HBB:c.31G>A	NM_000518.4:c.31G>A	NP_000509.1:p.(A11T)	VUS	VUS	Missense codons	11:5248221-5248221	missense_variant	0.35	0.487112	1		0.215	0.01	0.149048	0.865396	0.742826	-0.3625	0.262	0.533	0.463	0.11793			0.042	0.5272	-2.01	0.294202	0.0759191	-2.05	1.1	-1.34	2.389	-0.993	-0.284	0	0	15.5922	0.303972
841	NM_000518.4:c.32C>T	HBB:c.32C>T	NM_000518.4:c.32C>T	NP_000509.1:p.(A11V)	VUS	VUS	Missense codons	11:5248220-5248220	missense_variant	0.21	0.487112	1		0.25	0	0.155708	0.951106	0.657134	-0.4558	0.32	0.569	0.468	0.09739			0.069	0.5423	-2.12	0.324534	0.255362	-2.5	2.145	-1.08	5.523	0.122	-0.158	0	0	0.9575	0.339088
842	NM_000518.4:c.32C>A	HBB:c.32C>A	NM_000518.4:c.32C>A	NP_000509.1:p.(A11D)	VUS	VUS	Missense codons	11:5248220-5248220	missense_variant	0.05	0.487112	1		0.354	0	0.541308	0.96793	0.768923	0.0067	0.393	0.558	0.821	0.23569			0.457	0.6678	-2.12	0.477978	0.317879	-2.51	2.885	-3.17	6.534	0.122	-0.158	0	0	0.9575	0.561791
843	NM_000518.4:c.34G>A	HBB:c.34G>A	NM_000518.4:c.34G>A	NP_000509.1:p.(V12I)	VUS	VUS	Missense codons	11:5248218-5248218	missense_variant	1	0.487112	1		0.022	0	0.0157414	0.8242	0.847515	-0.5866		0.521	0.776	0.11568			0.001	0.4607	0.276	0.419689	0.0814609	-3.19	0.29	0.19	0.622	1.016	0.124	0.001	0.001	7.9068	0.296575
844	NM_000518.4:c.34G>T	HBB:c.34G>T	NM_000518.4:c.34G>T	NP_000509.1:p.(V12F)	VUS	VUS	Missense codons	11:5248218-5248218	missense_variant	0.02	0.487112	0.999999		0.719	0	0.976719	0.992365	0.967203	0.4656	0.76	0.633	0.9	0.57256			0.643	0.8772	0.276	1.43156	0.440788	-3.47	3.705	-2.85	17.3	1.016	0.124	0.001	0.001	7.9068	2.05062
847	NM_000518.4:c.35T>A	HBB:c.35T>A	NM_000518.4:c.35T>A	NP_000509.1:p.(V12D)	VUS	P/LP	Missense codons	11:5248217-5248217	missense_variant	0	0.487112	0.970706		0.962		0.906278	0.945782	0.973903	0.6905	0.764	0.689	0.803	0.96998			0.85	0.9235	5.24	4.38179	0.499766	-3.49	4.05	-5.29	22.8	8.297	1.311	0.001	0.001	14.3909	5.74483
848	NM_000518.4:c.41C>A	HBB:c.41C>A	NM_000518.4:c.41C>A	NP_000509.1:p.(A14D)	VUS	VUS	Missense codons	11:5248211-5248211	missense_variant	0.34	0.487112	1		0.017	0.01	0.085497	0.888145	0.650435	-0.77	0.266	0.543	0.495	0.08482			0.024	0.3873	-9.27	0.115679	0.0981146	-2.21	1.265	-1.43	0.344	-2.192	-0.709	0.004	0.137	16.8793	0.132714
849	NM_000518.4:c.44T>C	HBB:c.44T>C	NM_000518.4:c.44T>C	NP_000509.1:p.(L15P)	VUS	VUS	Missense codons	11:5248208-5248208	missense_variant	0	0.487112	1		0.998	0.02	0.988967	0.9985	0.844016	0.9095	0.769	0.822	0.919	0.8092			0.919	0.8797	4.12	3.47526	0.459687	-3.09	4.01	-5.12	24	3.636	1.311	0.499	0.45	10.219	4.53748
850	NM_000518.4:c.44T>G	HBB:c.44T>G	NM_000518.4:c.44T>G	NP_000509.1:p.(L15R)	VUS	VUS	Missense codons	11:5248208-5248208	missense_variant	0	0.487112	0.998335		0.99	0.03	0.990491	0.997153	0.964804	0.9065	0.765	0.797	0.766	0.83266			0.886	0.8783	4.12	3.46624	0.452635	-3.09	4.01	-4.51	23.9	3.636	1.311	0.499	0.45	10.219	4.52182
851	NM_000518.4:c.46T>G	HBB:c.46T>G	NM_000518.4:c.46T>G	NP_000509.1:p.(W16G)	VUS	VUS	Missense codons	11:5248206-5248206	missense_variant	0	0.487112	0.999942		0.893	0.05	0.999281	0.977223	0.824917	1.0905	0.605	0.838	0.712	0.97378			0.796	0.9408	5.24	7.49371	0.44904	-3.83	4.2	-10.65	25.7	5.413	1.311	0.587	0.527	14.3909	8.56871
852	NM_000518.4:c.46T>A	HBB:c.46T>A	NM_000518.4:c.46T>A	NP_000509.1:p.(W16R)	VUS	P/LP	Missense codons	11:5248206-5248206	missense_variant	0.02	0.487112	0.999842		0.947		0.966541	0.995406	0.845515	1.0965	0.907	0.914	0.693	0.97322			0.774	0.9495	5.24	8.20209	0.508761	-3.85	4.55	-11.44	24.8	5.413	1.311	0.587	0.527	14.3909	9.72755
852	NM_000518.4:c.46T>C	HBB:c.46T>C	NM_000518.4:c.46T>C	NP_000509.1:p.(W16R)	VUS	P/LP	Missense codons	11:5248206-5248206	missense_variant	0.02	0.487112	0.999852		0.947	0.02	0.966541	0.995084	0.845515	1.0965	0.907	0.914	0.693	0.94174			0.774	0.9495	5.24	8.20209	0.508754	-3.85	4.55	-11.44	24.9	5.413	1.311	0.587	0.527	14.3909	9.72755
853	NM_000518.4:c.49G>C	HBB:c.49G>C	NM_000518.4:c.49G>C	NP_000509.1:p.(G17R)	VUS	VUS	Missense codons	11:5248203-5248203	missense_variant	0.03	0.487112	0.954474		0.201		0.695668	0.984531	0.589341	0.0717	0.78	0.601	0.854	0.35524			0.384	0.698	-0.213	1.30076	0.334268	-2.42	2.845	-3.27	17.74	-0.636	0.125	0.525	0.548	0.3943	1.45363
854	NM_000518.4:c.50G>A	HBB:c.50G>A	NM_000518.4:c.50G>A	NP_000509.1:p.(G17D)	VUS	VUS	Missense codons	11:5248202-5248202	missense_variant	0.09	0.487112	0.97866		0.134	0	0.15712	0.995915	0.753825	-0.2423	0.743	0.575	0.859	0.23784			0.308	0.5766	1.05	1.19336	0.198456	-2.42	1.97	-2.58	15.04	-0.178	-0.245	0.49	0.541	5.8343	1.13856
855	NM_000518.4:c.54_59del	HBB:c.54_59del	NM_000518.4:c.54_59del	NP_000509.1:p.(K18_V19del)	VUS	P/LP	Inframe indels	11:5248192-5248198	inframe_deletion																									17.22
856	NM_000518.4:c.52A>G	HBB:c.52A>G	NM_000518.4:c.52A>G	NP_000509.1:p.(K18E)	VUS	VUS	Missense codons	11:5248200-5248200	missense_variant	0	0.487112	0.999948		0.884	0	0.988333	0.998735	0.90061	0.914	0.521	0.853	0.678	0.98385			0.789	0.8394	5.24	7.2328	0.308282	-2.49	4.53	-3.39	24.8	5.559	1.137	0.488	0.496	14.3909	8.17662
857	NM_000518.4:c.52A>C	HBB:c.52A>C	NM_000518.4:c.52A>C	NP_000509.1:p.(K18Q)	VUS	B/LB	Missense codons	11:5248200-5248200	missense_variant	0.02	0.487112	0.999913		0.723	0.07	0.947598	0.992876	0.90091	0.7171	0.513	0.769	0.647	0.98431			0.645	0.7652	5.24	6.02218	0.229394	-2.51	3.56	-3.39	24.2	5.559	1.137	0.488	0.496	14.3909	6.34508
858	NM_000518.4:c.54G>C	HBB:c.54G>C	NM_000518.4:c.54G>C	NP_000509.1:p.(K18N)	VUS	VUS	Missense codons	11:5248198-5248198	missense_variant	0.03	0.487112	0.99514		0.994		0.988778	0.997048	0.873813	0.6106	0.519	0.652	0.593	0.75751			0.817	0.8123	1.35	2.39164	0.132482	-2.52	3.635	-4.14	22.5	0.21	-0.24	0.389	0.346	9.0432	3.15932
858	NM_000518.4:c.54G>T	HBB:c.54G>T	NM_000518.4:c.54G>T	NP_000509.1:p.(K18N)	VUS	VUS	Missense codons	11:5248198-5248198	missense_variant	0.03	0.487112	0.994922		0.994	0.08	0.98899	0.997207	0.873813	0.6205	0.519	0.654	0.593	0.88651			0.817	0.8123	1.35	2.39164	0.132497	-2.52	3.635	-4.14	22.4	0.21	-0.24	0.389	0.346	9.0432	3.15932
859	NM_000518.4:c.55G>A	HBB:c.55G>A	NM_000518.4:c.55G>A	NP_000509.1:p.(V19M)	VUS	VUS	Missense codons	11:5248197-5248197	missense_variant	0.12	0.487112	0.94055		0.89	0.05	0.906595	0.998198	0.90091	0.9597	0.844	0.718	0.487	0.80998			0.611	0.883	5.24	4.75671	0.413238	-3.43	2.495	-2.13	22.9	1.551	1.025	0.373	0.302	17.9125	5.13588
860	NM_000518.4:c.56T>G	HBB:c.56T>G	NM_000518.4:c.56T>G	NP_000509.1:p.(V19G)	VUS	VUS	Missense codons	11:5248196-5248196	missense_variant	0	0.487112	1		0.994	0.15	0.976407	0.996027	0.912409	1.0793	0.903	0.971	0.879	0.98823			0.897	0.9312	5.24	7.765	0.508524	-3.51	4.265	-5.83	25.1	6.671	1.311	0.328	0.232	14.3909	9.35385
861	NM_000518.4:c.58A>G	HBB:c.58A>G	NM_000518.4:c.58A>G	NP_000509.1:p.(N20D)	VUS	VUS	Missense codons	11:5248194-5248194	missense_variant	0.65	0.487112	0.999765		0.026	0.04	0.102987	0.908053	0.808919	-0.6519	0.607	0.386	0.55	0.27473			0.004	0.4069	-0.955	0.405409	0.0128001	-2.29	0.455	-0.9	1.666	0.634	-0.735	0.041	0.046	10.5899	0.298071
863	NM_000518.4:c.60C>A	HBB:c.60C>A	NM_000518.4:c.60C>A	NP_000509.1:p.(N20K)	VUS	VUS	Missense codons	11:5248192-5248192	missense_variant	0.11	0.487112	0.999986		0.111	0.37	0.0977657	0.640577	0.750425	-0.6437	0.755	0.472	0.853	0.14831			0.28	0.4215	-10.5	0.00956388	-0.0156134	-2.33	0.7	-3.11	0.001	-3.9	-2.552	0.001	0.023	6.3646	0.0161954
863	NM_000518.4:c.60C>G	HBB:c.60C>G	NM_000518.4:c.60C>G	NP_000509.1:p.(N20K)	VUS	VUS	Missense codons	11:5248192-5248192	missense_variant	0.11	0.487112	0.999987		0.111		0.0985868	0.656117	0.750425	-0.6437	0.755	0.472	0.853	0.14434			0.28	0.4215	-10.5	0.00956388	-0.0156148	-2.33	0.7	-3.11	0.001	-3.9	-2.552	0.001	0.023	6.3646	0.0161954
864	NM_000518.4:c.61G>A	HBB:c.61G>A	NM_000518.4:c.61G>A	NP_000509.1:p.(V21M)	VUS	P/LP	Missense codons	11:5248191-5248191	missense_variant	0.06	0.487112	1		0.575	0.02	0.597974	0.997394	0.90251	-0.154	0.685	0.57	0.51	0.2691			0.52	0.6174	3.32	1.38229	0.228572	-2.46	3.48	-1.92	15.73	-0.069	1.025	0.003	0.029	5.264	1.81488
865	NM_000518.4:c.62T>G	HBB:c.62T>G	NM_000518.4:c.62T>G	NP_000509.1:p.(V21G)	VUS	P/LP	Missense codons	11:5248190-5248190	missense_variant	0.01	0.487112	0.999996		0.944	0.06	0.953975	0.990282	0.906909	-0.1468	0.743	0.549	0.804	0.3762			0.794	0.7041	1.62	1.40343	0.34381	-2.19	3.025	-5.05	21	0.902	0.323	0.002	0.032	5.0269	2.0354
866	NM_000518.4:c.62T>A	HBB:c.62T>A	NM_000518.4:c.62T>A	NP_000509.1:p.(V21E)	VUS	P/LP	Missense codons	11:5248190-5248190	missense_variant	0.03	0.487112	1		0.285		0.239132	0.910462	0.783222	-0.1868	0.769	0.54	0.521	0.20104			0.452	0.6053	1.62	0.820913	0.297525	-2.47	1.89	-3.79	14.7	0.902	0.323	0.002	0.032	5.0269	0.846298
867	NM_000518.4:c.64G>T	HBB:c.64G>T	NM_000518.4:c.64G>T	NP_000509.1:p.(D22Y)	VUS	VUS	Missense codons	11:5248188-5248188	missense_variant	0	0.487112	0.799343		0.939	0.05	0.977066	0.986742	0.946405	0.5722	0.517	0.582	0.684	0.81832			0.829	0.8273	4.33	2.36384	0.277184	-2.39	3.73	-3.72	23.3	4.394	1.025	0.004	0.034	13.2849	3.34901
868	NM_000518.4:c.64G>C	HBB:c.64G>C	NM_000518.4:c.64G>C	NP_000509.1:p.(D22H)	VUS	VUS	Missense codons	11:5248188-5248188	missense_variant	0.01	0.487112	0.882412		0.31		0.800922	0.990292	0.827917	0.2965	0.58	0.563	0.854	0.82275			0.502	0.7198	4.33	1.5247	0.378071	-2.38	3.385	-2.48	20.6	4.394	1.025	0.004	0.034	13.2849	1.74194
869	NM_000518.4:c.64G>A	HBB:c.64G>A	NM_000518.4:c.64G>A	NP_000509.1:p.(D22N)	VUS	VUS	Missense codons	11:5248188-5248188	missense_variant	0.05	0.487112	0.974875		0.099	0.11	0.489376	0.997041	0.831917	-0.1007	0.583	0.466	0.827	0.75001			0.353	0.6051	4.33	1.33833	0.068997	-2.34	2.14	-1.78	16.64	4.394	1.025	0.004	0.034	13.2849	1.39031
870	NM_000518.4:c.65A>G	HBB:c.65A>G	NM_000518.4:c.65A>G	NP_000509.1:p.(D22G)	VUS	VUS	Missense codons	11:5248187-5248187	missense_variant	0.14	0.487112	0.980389		0.197	0	0.165861	0.993669	0.80472	-0.2438	0.574	0.543	0.847	0.4446			0.268	0.5641	2.9	0.888142	0.337054	-2.29	1.89	-2.28	16.47	0.452	1.137	0.004	0.034	7.2657	0.883195
871	NM_000518.4:c.65A>T	HBB:c.65A>T	NM_000518.4:c.65A>T	NP_000509.1:p.(D22V)	VUS	VUS	Missense codons	11:5248187-5248187	missense_variant	0.02	0.487112	0.995116		0.145		0.371245	0.981414	0.761624	0.0309	0.556	0.546	0.85	0.6044			0.396	0.6358	2.9	0.935978	0.337355	-2.38	2.835	-3.31	17.72	0.452	1.137	0.004	0.034	7.2657	0.977252
872	NM_000518.4:c.69_80delAGTTGGTGGTGA	HBB:c.69_80delAGTTGGTGGTGA	NM_000518.4:c.69_80delAGTTGGTGGTGA	NP_000509.1:p.(V24_E27del)	VUS	P/LP	Inframe indels	11:5248171-5248183	inframe_deletion																									22.2
873	NM_000518.4:c.67G>C	HBB:c.67G>C	NM_000518.4:c.67G>C	NP_000509.1:p.(E23Q)	VUS	P/LP	Missense codons	11:5248185-5248185	missense_variant	0.15	0.487112	1		0.102		0.0623835	0.987646	0.309669	-0.3967	0.667	0.54	0.67	0.38543			0.249	0.5372	-0.266	0.553447	0.099842	-2.61	1.71	-1.21	7.597	2.212	0.108	0.037	0.066	2.0509	0.536771
874	NM_000518.4:c.67G>A	HBB:c.67G>A	NM_000518.4:c.67G>A	NP_000509.1:p.(E23K)	VUS	B/LB	Missense codons	11:5248185-5248185	missense_variant	0.14	0.487112	1		0.092	0.25	0.293297	0.99437	0.354465	-0.4414	0.755	0.536	0.848	0.40654			0.257	0.5223	-0.266	0.535935	0.309276	-2.53	2.25	-2	12.56	2.212	0.108	0.037	0.066	2.0509	0.512707
875	NM_000518.4:c.68A>T	HBB:c.68A>T	NM_000518.4:c.68A>T	NP_000509.1:p.(E23V)	VUS	VUS	Missense codons	11:5248184-5248184	missense_variant	0.16	0.487112	1		0.142		0.720397	0.986832	0.281072	-0.1915	0.708	0.557	0.819	0.43711			0.071	0.6108	2.79	0.963491	0.37166	-2.6	2.475	-3.1	16.38	1.784	1.137	0.086	0.142	11.2583	0.936676
876	NM_000518.4:c.68A>C	HBB:c.68A>C	NM_000518.4:c.68A>C	NP_000509.1:p.(E23A)	VUS	B/LB	Missense codons	11:5248184-5248184	missense_variant	0.16	0.487112	1		0.127	0.05	0.0823745	0.943894	0.0712929	-0.2537	0.667	0.566	0.666	0.50681			0.07	0.5953	2.79	0.941516	0.182391	-2.6	1.29	-2.48	13.61	1.784	1.137	0.086	0.142	11.2583	0.900833
877	NM_000518.4:c.68A>G	HBB:c.68A>G	NM_000518.4:c.68A>G	NP_000509.1:p.(E23G)	VUS	VUS	Missense codons	11:5248184-5248184	missense_variant	0.01	0.487112	1		0.269	0	0.728058	0.997599	0.247975	0.1354	0.628	0.59	0.861	0.52571			0.434	0.7328	2.79	1.06906	0.235265	-2.64	3.255	-3.62	17.51	1.784	1.137	0.086	0.142	11.2583	1.13442
878	NM_000518.4:c.71_73del	HBB:c.71_73del	NM_000518.4:c.71_73del	NP_000509.1:p.(V24del)	VUS	P/LP	Inframe indels	11:5248178-5248181	inframe_deletion						0.05																			22.3
879	NM_000518.4:c.70G>A	HBB:c.70G>A	NM_000518.4:c.70G>A	NP_000509.1:p.(V24I)	VUS	VUS	Missense codons	11:5248182-5248182	missense_variant	0.77	0.487112	1		0.055	0.07	0.0569106	0.875412	0.724428	-0.7607	0.52	0.599	0.395	0.09529			0.005	0.333	-1.31	0.524645	0.143352	-2.32	0	-0.24	8.083	-0.049	0.094	0.295	0.494	3.075	0.429644
880	NM_000518.4:c.70G>T	HBB:c.70G>T	NM_000518.4:c.70G>T	NP_000509.1:p.(V24F)	VUS	P/LP	Missense codons	11:5248182-5248182	missense_variant	0.05	0.487112	1		0.52	0.06	0.407991	0.986841	0.762324	-0.0885	0.536	0.62	0.805	0.16397			0.52	0.6385	-1.31	0.947466	0.238455	-2.36	1.71	-2.73	19.45	-0.049	0.094	0.295	0.494	3.075	1.10657
881	NM_000518.4:c.71T>C	HBB:c.71T>C	NM_000518.4:c.71T>C	NP_000509.1:p.(V24A)	VUS	P/LP	Missense codons	11:5248181-5248181	missense_variant	0.44	0.487112	0.999999		0.276	0.02	0.137847	0.887963	0.630137	-0.6035	0.625	0.554	0.467	0.3389			0.042	0.4395	-1.04	0.731062	0.260832	-2.1	1.875	-1.89	11.42	1.191	0.268	0.566	0.692	0.2135	0.652569
882	NM_000518.4:c.71T>G	HBB:c.71T>G	NM_000518.4:c.71T>G	NP_000509.1:p.(V24G)	VUS	P/LP	Missense codons	11:5248181-5248181	missense_variant	0.02	0.487112	0.925178		0.993	0	0.932631	0.992753	0.840116	-0.0344	0.677	0.634	0.732	0.28755			0.833	0.7519	-1.04	1.57802	0.369305	-2.37	3.5	-4.22	21.5	1.191	0.268	0.566	0.692	0.2135	2.32783
883	NM_000518.4:c.71T>A	HBB:c.71T>A	NM_000518.4:c.71T>A	NP_000509.1:p.(V24D)	VUS	P/LP	Missense codons	11:5248181-5248181	missense_variant	0.17	0.487112	0.947365		0.711		0.674284	0.97621	0.759024	-0.175	0.671	0.631	0.817	0.34854			0.316	0.6342	-1.04	1.20814	0.324784	-2.38	2.405	-3.69	17.15	1.191	0.268	0.566	0.692	0.2135	1.48818
885	NM_000518.4:c.73G>C	HBB:c.73G>C	NM_000518.4:c.73G>C	NP_000509.1:p.(G25R)	VUS	P/LP	Missense codons	11:5248179-5248179	missense_variant	0.01	0.487112	1		1		0.999009	0.999248	0.940306	1.0822	0.901	0.924	0.962	0.98455			0.905	0.9688	5.24	14.1541	0.549116	-4.29	4.635	-6.7	31	7.147	1.025	0.934	0.863	17.9125	14.4082
886	NM_000518.4:c.74G>A	HBB:c.74G>A	NM_000518.4:c.74G>A	NP_000509.1:p.(G25D)	VUS	VUS	Missense codons	11:5248178-5248178	missense_variant	0	0.487112	1		1	0.3	0.998793	0.99838	0.90031	1.0822	0.879	0.949	0.935	0.98368			0.945	0.9688	5.24	14.6744	0.549038	-4.29	4.635	-5.85	32	7.147	1.025	0.966	0.902	17.9125	14.6966
887	NM_000518.4:c.74G>T	HBB:c.74G>T	NM_000518.4:c.74G>T	NP_000509.1:p.(G25V)	VUS	VUS	Missense codons	11:5248178-5248178	missense_variant	0.01	0.487112	1		1	0.61	0.999487	0.998004	0.985761	1.0913	0.894	0.922	0.963	0.98438			0.905	0.9633	5.24	13.0684	0.547629	-4.24	4.085	-7.48	31	7.147	1.025	0.966	0.902	17.9125	12.8796
888	NM_000518.4:c.76G>C	HBB:c.76G>C	NM_000518.4:c.76G>C	NP_000509.1:p.(G26R)	VUS	VUS	Missense codons	11:5248176-5248176	missense_variant	0.04	0.487112	0.827205		0.995		0.987212	0.99922	0.912209	0.524	0.841	0.606	0.478	0.30854			0.806	0.8431	5.24	5.31736	0.348318	-2.64	3.12	-4.21	27.1	2.976	1.025	0.99	0.94	13.6209	5.95949
889	NM_000518.4:c.77G>A	HBB:c.77G>A	NM_000518.4:c.77G>A	NP_000509.1:p.(G26D)	VUS	VUS	Missense codons	11:5248175-5248175	missense_variant	0.02	0.487112	0.973859		0.994	0	0.950471	0.997265	0.972203	0.3375	0.849	0.688	0.858	0.18262			0.835	0.8601	2.07	2.73345	0.390307	-2.64	3.815	-3.99	24	-0.435	1.025	0.995	0.948	10.8753	3.65668
893	NM_000518.4:c.80A>G	HBB:c.80A>G	NM_000518.4:c.80A>G	NP_000509.1:p.(E27G)	VUS	VUS	Missense codons	11:5248172-5248172	missense_variant	0.01	0.487112	0.960092		0.886	0	0.980829	0.999094	0.850515	0.8446	0.789	0.698	0.585	0.97052			0.752	0.797	5.24	7.88865	0.221962	-2.24	4.355	-5.45	32	5.514	1.137	1	0.971	14.3909	7.98953
894	NM_000518.4:c.80A>C	HBB:c.80A>C	NM_000518.4:c.80A>C	NP_000509.1:p.(E27A)	VUS	P/LP	Cryptic splice site; Missense codons	11:5248172-5248172	missense_variant	0.09	0.487112	0.952431		0.993	0.31	0.990267	0.997033	0.921108	0.9419	0.856	0.796	0.81	0.95384			0.746	0.8385	5.24	8.61891	0.345438	-2.54		-4.57	25	5.514	1.137	1	0.971	14.3909	8.83325
895	NM_000518.4:c.80A>T	HBB:c.80A>T	NM_000518.4:c.80A>T	NP_000509.1:p.(E27V)	VUS	VUS	Missense codons	11:5248172-5248172	missense_variant	0.01	0.487112	0.979157		0.995		0.992252	0.99147	0.921208	0.9736	0.808	0.793	0.661	0.97146			0.863	0.8601	5.24	9.39785	0.307223	-2.56	4.01	-5.55	28.6	5.514	1.137	1	0.971	14.3909	9.89716
897	NM_000518.4:c.83C>T	HBB:c.83C>T	NM_000518.4:c.83C>T	NP_000509.1:p.(A28V)	VUS	P/LP	Missense codons	11:5248169-5248169	missense_variant	0.02	0.487112	0.999999		0.462	0.13	0.904111	0.999209	0.855714	0.4914	0.744	0.777	0.502	0.98807			0.534	0.7115	5.24	7.06618	0.240478	-2.45	2.645	-2.36	27.8	7.256	1.175	1	0.977	17.9125	5.87577
898	NM_000518.4:c.83C>A	HBB:c.83C>A	NM_000518.4:c.83C>A	NP_000509.1:p.(A28D)	VUS	VUS	Missense codons	11:5248169-5248169	missense_variant	0	0.487112	1		0.976	0.03	0.997789	0.997191	0.940506	0.9713	0.813	0.93	0.877	0.98902			0.863	0.8772	5.24	16.7954	0.453826	-2.45	4.435	-3.68	31	7.256	1.175	1	0.977	17.9125	15.4243
899	NM_000518.4:c.83C>G	HBB:c.83C>G	NM_000518.4:c.83C>G	NP_000509.1:p.(A28G)	P/LP	VUS	Missense codons	11:5248169-5248169	missense_variant	0.01	0.487112	0.999999		0.907		0.994978	0.99766	0.839116	0.9598	0.79	0.879	0.859	0.9893			0.766	0.8744	5.24	15.4655	0.403491	-2.45	4.085	-2.77	31	7.256	1.175	1	0.977	17.9125	14.1829
900	NM_000518.4:c.85C>A	HBB:c.85C>A	NM_000518.4:c.85C>A	NP_000509.1:p.(L29M)	VUS	P/LP	Missense codons	11:5248167-5248167	missense_variant	0.01	0.487112	0.999663		1	0	0.965829	0.995077	0.969003	1.0013	0.852	0.883	0.888	0.96554			0.905	0.9174	3.38	4.8963	0.494681	-3.63	3.8	-1.71	24.1	5.723	0.197	1	0.969	10.9902	5.60922
901	NM_000518.4:c.86T>C	HBB:c.86T>C	NM_000518.4:c.86T>C	NP_000509.1:p.(L29P)	VUS	P/LP	Missense codons	11:5248166-5248166	missense_variant	0.02	0.487112	1		1	0.09	0.998495	0.999048	0.89971	1.0934	0.905	0.989	0.948	0.98704			0.883	0.942	5.24	14.0488	0.537554	-3.67	4.255	-5.89	29.1	8.44	1.311	1	0.969	14.3909	14.147
902	NM_000518.4:c.86T>A	HBB:c.86T>A	NM_000518.4:c.86T>A	NP_000509.1:p.(L29Q)	VUS	P/LP	Missense codons	11:5248166-5248166	missense_variant	0	0.487112	0.999998		1		0.997734	0.995318	0.983902	1.0934	0.876	0.978	0.947	0.98795			0.945	0.942	5.24	14.0488	0.535081	-3.67	4.605	-5.13	28.6	8.44	1.311	1	0.969	14.3909	14.147
904	NM_000518.4:c.88G>A	HBB:c.88G>A	NM_000518.4:c.88G>A	NP_000509.1:p.(G30S)	VUS	VUS	Missense codons	11:5248164-5248164	missense_variant	0.24	0.487112	0.690272		0.862	0	0.907726	0.998737	0.916808	0.3161	0.699	0.688	0.822	0.76244			0.37	0.5691	4.33	4.13883	0.307549	-1.96	1.695	-2.43	23.5	0.696	1.025	1	0.959	9.594	4.08647
905	NM_000518.4:c.89G>A	HBB:c.89G>A	NM_000518.4:c.89G>A	NP_000509.1:p.(G30D)	VUS	P/LP	Missense codons	11:5248163-5248163	missense_variant	0.01	0.487112	0.979185		0.99	0	0.995678	0.998527	0.974203	0.6496	0.799	0.737	0.702	0.8899			0.847	0.7667	5.24	7.1149	0.408578	-2.26	4.05	-4.01	25.9	1.18	1.025	1	0.949	12.7149	7.19455
907	NM_000518.4:c.93G>T	HBB:c.93G>T	NM_000518.4:c.93G>T	NP_000509.1:p.(R31S)	VUS	VUS	Splice region variant; Missense codons	11:5248029-5248029	missense_variant,splice_region_variant	0.04	0.487112	0.999968		0.992	0.01	0.333235	0.996818	0.734027	1.0796		0.947	0.627	0.85314	0.998662	0.966	0.796	0.9749	4.18	4.84231	0.376297	-5.09	3.36	-4.23	32	1.837	1.025	0.869	0.838	13.9529	5.85408	1.939	20.4213
908	NM_000518.4:c.94C>G	HBB:c.94C>G	NM_000518.4:c.94C>G	NP_000509.1:p.(L32V)	VUS	P/LP	Splice region variant; Missense codons	11:5248028-5248028	missense_variant,splice_region_variant	0.06	0.487112	0.539111		0.767		0.601649	0.994611	0.853715	0.2123	0.937	0.683	0.796	0.76474	1.06836e-05	0.014	0.607	0.6768	-0.417	1.8346	0.241649	-2.21	2.535	-2.36	18.48	0.35	-0.129	0.886	0.86	3.2593	2.15422	-0.959	-10.1001
909	NM_000518.4:c.95T>G	HBB:c.95T>G	NM_000518.4:c.95T>G	NP_000509.1:p.(L32R)	VUS	VUS	Splice region variant; Missense codons	11:5248027-5248027	missense_variant,splice_region_variant	0	0.487112	0.969426		0.999	0	0.99646	0.997155	0.966803	1.0502	0.928	0.872	0.983	0.80555			0.935	0.8895	5.1	6.48479	0.443117	-2.86	4.27	-5.17	25.2	2.947	1.311	0.947	0.904	14.1449	7.65771	0.434	4.57083
910	NM_000518.4:c.95T>C	HBB:c.95T>C	NM_000518.4:c.95T>C	NP_000509.1:p.(L32P)	VUS	VUS	Splice region variant; Missense codons	11:5248027-5248027	missense_variant,splice_region_variant	0	0.487112	0.999999		1	0	0.99745	0.998815	0.79622	1.0141	0.94	0.922	0.993	0.81459			0.945	0.8895	5.1	6.48763	0.446593	-2.86	4.27	-6.01	25.2	2.947	1.311	0.947	0.904	14.1449	7.66248	-0.29	-3.05424
911	NM_000518.4:c.97C>G	HBB:c.97C>G	NM_000518.4:c.97C>G	NP_000509.1:p.(L33V)	VUS	VUS	Missense codons	11:5248025-5248025	missense_variant	0	0.487112	1		0.836		0.992251	0.998151	0.891311	1.0589	0.887	0.904	0.925	0.94356			0.764	0.9256	5.1	7.28714	0.491853	-3.49	3.925	-2.62	25.2	4.5	1.175	0.971	0.944	17.6123	7.88522
912	NM_000518.4:c.98T>C	HBB:c.98T>C	NM_000518.4:c.98T>C	NP_000509.1:p.(L33P)	VUS	VUS	Missense codons	11:5248024-5248024	missense_variant	0	0.487112	1		1	0.01	0.997526	0.998945	0.968303	1.0872	0.896	0.961	0.993	0.96767			0.945	0.9366	5.1	10.309	0.529353	-3.53	4.475	-6.21	26.7	8.702	1.311	0.97	0.953	14.1449	11.3781
913	NM_000518.4:c.98T>A	HBB:c.98T>A	NM_000518.4:c.98T>A	NP_000509.1:p.(L33Q)	VUS	VUS	Missense codons	11:5248024-5248024	missense_variant	0	0.487112	1		0.999		0.997267	0.994942	0.981302	1.0872	0.895	0.98	0.972	0.96806			0.935	0.9366	5.1	10.3026	0.529019	-3.53	4.475	-5.29	26.7	8.702	1.311	0.97	0.953	14.1449	11.3704
915	NM_000518.4:c.98T>G	HBB:c.98T>G	NM_000518.4:c.98T>G	NP_000509.1:p.(L33R)	VUS	VUS	Missense codons	11:5248024-5248024	missense_variant	0	0.487112	1		0.998	0	0.997267	0.997543	0.977802	1.0872	0.906	0.977	0.992	0.96914			0.919	0.9366	5.1	10.3026	0.529026	-3.53	4.475	-5.3	27.8	8.702	1.311	0.97	0.953	14.1449	11.3704
916	NM_000518.4:c.100G>A	HBB:c.100G>A	NM_000518.4:c.100G>A	NP_000509.1:p.(V34M)	VUS	VUS	Missense codons	11:5248022-5248022	missense_variant	0	0.487112	0.635453		0.972	0	0.925965	0.998077	0.916508	0.2679	0.514	0.622	0.552	0.53718			0.859	0.7325	2.18	3.26829	0.181414	-2.31	3.495	-2.37	23.5	0.23	0.124	0.939	0.958	5.2486	3.98063
919	NM_000518.4:c.103G>C	HBB:c.103G>C	NM_000518.4:c.103G>C	NP_000509.1:p.(V35L)	VUS	P/LP	Missense codons	11:5248019-5248019	missense_variant	0	0.487112	0.999994		0.973		0.98335	0.998194	0.977502	0.8556	0.939	0.828	0.876	0.94336			0.859	0.8317	5.1	8.64312	0.429611	-2.3	3.945	-2.45	25.4	5.651	1.025	0.92	0.964	17.6123	9.32215
920	NM_000518.4:c.103G>T	HBB:c.103G>T	NM_000518.4:c.103G>T	NP_000509.1:p.(V35F)	VUS	P/LP	Missense codons	11:5248019-5248019	missense_variant	0.02	0.487112	0.999999		0.981	0	0.995839	0.995419	0.891911	0.8347	0.937	0.864	0.889	0.94064			0.808	0.8257	5.1	8.45092	0.433755	-2.33	4.15	-4.27	25.9	5.651	1.025	0.92	0.964	17.6123	9.0365
921	NM_000518.4:c.104T>A	HBB:c.104T>A	NM_000518.4:c.104T>A	NP_000509.1:p.(V35D)	VUS	P/LP	Missense codons	11:5248018-5248018	missense_variant	0	0.487112	1		1		0.998555	0.987694	0.982402	0.8376	0.945	0.96	0.951	0.96806			0.945	0.8174	5.1	9.3624	0.446412	-2.31	3.945	-6.2	27.1	6.927	1.311	0.943	0.972	14.1449	9.83789
922	NM_000518.4:c.107A>T	HBB:c.107A>T	NM_000518.4:c.107A>T	NP_000509.1:p.(Y36F)	VUS	P/LP	Missense codons	11:5248015-5248015	missense_variant	0.03	0.487112	0.999999		0.717		0.966155	0.967191	0.89741	0.4876	0.912	0.856	0.686	0.94323			0.624	0.7002	5.1	4.94681	0.385993	-2.31	2.995	-3.56	25.6	7.47	1.137	0.987	0.99	14.1449	4.58591
923	NM_000518.4:c.109C>A	HBB:c.109C>A	NM_000518.4:c.109C>A	NP_000509.1:p.(P37T)	VUS	P/LP	Missense codons	11:5248013-5248013	missense_variant	0.01	0.487112	1		0.999	0	0.999111	0.996449	0.951605	1.0199	0.927	0.974	0.974	0.97163			0.896	0.9855	5.1	16.3304	0.565074	-5.44	4.65	-7.12	26.3	9.338	1.175	0.992	0.994	17.6123	15.9847
924	NM_000518.4:c.109C>G	HBB:c.109C>G	NM_000518.4:c.109C>G	NP_000509.1:p.(P37A)	VUS	P/LP	Missense codons	11:5248013-5248013	missense_variant	0	0.487112	1		0.997		0.996104	0.995849	0.983002	1.0414	0.912	0.969	0.973	0.97276			0.911	0.9835	5.1	15.0711	0.545893	-5.4	4.305	-7.12	25.8	9.338	1.175	0.992	0.994	17.6123	14.6277
925	NM_000518.4:c.109C>T	HBB:c.109C>T	NM_000518.4:c.109C>T	NP_000509.1:p.(P37S)	VUS	P/LP	Missense codons	11:5248013-5248013	missense_variant	0.02	0.487112	1		0.996	0	0.999005	0.999163	0.985451	1.0199	0.934	0.978	0.984	0.96808			0.845	0.9855	5.1	16.2982	0.558573	-5.42	4.65	-7.07	27.1	9.338	1.175	0.992	0.994	17.6123	15.9523
926	NM_000518.4:c.110C>G	HBB:c.110C>G	NM_000518.4:c.110C>G	NP_000509.1:p.(P37R)	VUS	P/LP	Missense codons	11:5248012-5248012	missense_variant	0	0.487112	1		1		0.999341	0.99652	0.980102	1.0199	0.899	0.936	0.987	0.96069			0.945	0.9855	5.1	13.9071	0.546102	-5.45	4.65	-8.05	27.5	6.327	1.175	0.991	0.995	17.6123	14.2963
927	NM_000518.4:c.110C>A	HBB:c.110C>A	NM_000518.4:c.110C>A	NP_000509.1:p.(P37H)	VUS	P/LP	Missense codons	11:5248012-5248012	missense_variant	0	0.487112	1		1	0	0.999341	0.995043	0.757524	1.0199	0.929	0.966	0.986	0.95845			0.945	0.9855	5.1	13.9071	0.5461	-5.45	4.65	-8.04	28	6.327	1.175	0.991	0.995	17.6123	14.2963
928	NM_000518.4:c.112T>A	HBB:c.112T>A	NM_000518.4:c.112T>A	NP_000509.1:p.(W38R)	VUS	VUS	Missense codons	11:5248010-5248010	missense_variant	0	0.487112	1		0.997		0.996951	0.994165	0.839216	0.6737	0.882	0.904	0.963	0.94885			0.911	0.7465	5.1	8.76242	0.411269	-1.79	4.315	-12.51	29.8	5.719	1.311	0.996	0.996	14.1449	9.04682
928	NM_000518.4:c.112T>C	HBB:c.112T>C	NM_000518.4:c.112T>C	NP_000509.1:p.(W38R)	VUS	VUS	Missense codons	11:5248010-5248010	missense_variant	0	0.487112	1		0.997	0	0.996951	0.993239	0.839216	0.6737	0.882	0.904	0.963	0.93811			0.911	0.7465	5.1	8.76242	0.411261	-1.79	4.315	-12.51	29.2	5.719	1.311	0.996	0.996	14.1449	9.04682
929	NM_000518.4:c.112T>G	HBB:c.112T>G	NM_000518.4:c.112T>G	NP_000509.1:p.(W38G)	VUS	VUS	Missense codons	11:5248010-5248010	missense_variant	0	0.487112	1		1	0	0.998851	0.982566	0.969203	0.7516	0.82	0.916	0.799	0.95174			0.945	0.7909	5.1	8.35324	0.424008	-2.28	3.62	-11.66	29.7	5.719	1.311	0.996	0.996	14.1449	8.48406
930	NM_000518.4:c.113G>C	HBB:c.113G>C	NM_000518.4:c.113G>C	NP_000509.1:p.(W38S)	VUS	P/LP	Missense codons	11:5248009-5248009	missense_variant	0	0.487112	1		1		0.999719	0.989935	0.976702	0.7127	0.847	0.791	0.811	0.94844			0.945	0.7905	5.1	8.71091	0.419184	-2.26	3.34	-12.52	29.1	4.546	1.025	0.998	0.997	17.6123	8.56325
931	NM_000518.4:c.114G>T	HBB:c.114G>T	NM_000518.4:c.114G>T	NP_000509.1:p.(W38C)	VUS	VUS	Missense codons	11:5248008-5248008	missense_variant	0	0.487112	1		1	0	0.999851	0.991986	0.990726	0.9388	0.798	0.852	0.928	0.96151			0.945	0.8571	5.1	12.9533	0.451061	-2.3	4.315	-11.61	32	7.336	1.025	1	0.998	17.6123	12.9215
932	NM_000518.4:c.115A>C	HBB:c.115A>C	NM_000518.4:c.115A>C	NP_000509.1:p.(T39P)	VUS	VUS	Missense codons	11:5248007-5248007	missense_variant	0	0.487112	1		0.999	0	0.998217	0.996636	0.856914	1.0258	0.955	0.924	0.916	0.93469			0.935	0.8876	5.1	9.16424	0.453057	-2.59	4.625	-5.48	26.4	5.706	1.137	1	0.999	14.1449	10.4178
933	NM_000518.4:c.116C>A	HBB:c.116C>A	NM_000518.4:c.116C>A	NP_000509.1:p.(T39N)	VUS	P/LP	Missense codons	11:5248006-5248006	missense_variant	0	0.487112	1		0.975	0	0.997004	0.993352	0.888211	1.0293	0.957	0.866	0.967	0.95801			0.861	0.8931	5.1	14.1892	0.205934	-2.58	4.625	-4.56	25.6	9.297	1.175	1	0.999	17.6123	14.265
934	NM_000518.4:c.116C>T	HBB:c.116C>T	NM_000518.4:c.116C>T	NP_000509.1:p.(T39I)	VUS	P/LP	Missense codons	11:5248006-5248006	missense_variant	0	0.487112	1		1	0	0.999201	0.999061	0.939806	1.0323	0.933	0.928	0.953	0.95293			0.945	0.8955	5.1	14.4018	0.466779	-2.41	4.625	-5.48	26.4	9.297	1.175	1	0.999	17.6123	14.4854
935	NM_000518.4:c.118C>A	HBB:c.118C>A	NM_000518.4:c.118C>A	NP_000509.1:p.(Q40K)	VUS	VUS	Missense codons	11:5248004-5248004	missense_variant	0.02	0.487112	0.999989		0.732	0	0.935344	0.995851	0.883612	0.5563	0.637	0.733	0.588	0.87409			0.651	0.7311	4.13	4.75601	0.256852	-3.09	1.32	-3.43	25	3.638	1.175	1	0.999	14.3847	4.40095
936	NM_000518.4:c.118C>G	HBB:c.118C>G	NM_000518.4:c.118C>G	NP_000509.1:p.(Q40E)	VUS	VUS	Missense codons	11:5248004-5248004	missense_variant	0	0.487112	0.999979		0.948		0.932011	0.993669	0.907309	0.9848	0.656	0.843	0.539	0.8957			0.836	0.9017	4.13	7.5295	0.271415	-3.34	3.225	-2.52	24.7	3.638	1.175	1	0.999	14.3847	8.17256
937	NM_000518.4:c.119A>G	HBB:c.119A>G	NM_000518.4:c.119A>G	NP_000509.1:p.(Q40R)	VUS	VUS	Missense codons	11:5248003-5248003	missense_variant	0.04	0.487112	0.999908		0.598	0	0.850053	0.997996	0.660234	0.528	0.657	0.78	0.812	0.86648			0.556	0.8097	1.28	2.70181	0.36035	-3.32	2.045	-3.44	23.4	3.8	1.137	1	0.999	6.4116	2.77539
938	NM_000518.4:c.120G>C	HBB:c.120G>C	NM_000518.4:c.120G>C	NP_000509.1:p.(Q40H)	VUS	VUS	Missense codons	11:5248002-5248002	missense_variant	0.02	0.487112	0.999995		0.77		0.987983	0.997337	0.844715	0.9586	0.687	0.838	0.718	0.9008			0.669	0.9014	4.19	6.32658	0.321571	-3.49	3.575	-4.35	25.5	2.968	1.025	1	0.998	9.2258	6.50031
939	NM_000518.4:c.122G>A	HBB:c.122G>A	NM_000518.4:c.122G>A	NP_000509.1:p.(R41K)	VUS	P/LP	Missense codons	11:5248000-5248000	missense_variant	0.04	0.487112	1		0.938	0	0.847031	0.996555	0.859414	0.9084		0.873	0.878	0.93568			0.732	0.8694	5.1	8.0283	0.394437	-3.27	3.07	-2.27	27.8	4.517	1.025	0.998	0.997	17.6123	7.65429
940	NM_000518.4:c.122G>T	HBB:c.122G>T	NM_000518.4:c.122G>T	NP_000509.1:p.(R41M)	VUS	VUS	Missense codons	11:5248000-5248000	missense_variant	0	0.487112	1		0.994	0	0.996666	0.967365	0.835616	1.0341	0.905	0.894	0.771	0.9439			0.897	0.9187	5.1	9.64546	0.481698	-3.42	4.315	-5.19	29.2	4.517	1.025	0.998	0.997	17.6123	9.66732
941	NM_000518.4:c.123G>C	HBB:c.123G>C	NM_000518.4:c.123G>C	NP_000509.1:p.(R41S)	VUS	P/LP	Missense codons	11:5247999-5247999	missense_variant	0.02	0.487112	1		0.99		0.994358	0.997869	0.948405	0.9677	0.853	0.901	0.889	0.84875			0.825	0.8919	5.1	7.14541	0.473945	-3.32	3.42	-5.03	26.9	1.962	1.025	0.997	0.996	17.6123	7.29152
941	NM_000518.4:c.123G>T	HBB:c.123G>T	NM_000518.4:c.123G>T	NP_000509.1:p.(R41S)	VUS	P/LP	Missense codons	11:5247999-5247999	missense_variant	0.02	0.487112	1		0.99	0	0.994358	0.998042	0.948405	0.9677	0.853	0.9	0.889	0.85101			0.825	0.8919	5.1	7.14541	0.473946	-3.32	3.42	-5.03	27.3	1.962	1.025	0.997	0.996	17.6123	7.29152
942	NM_000518.4:c.125T>G	HBB:c.125T>G	NM_000518.4:c.125T>G	NP_000509.1:p.(F42C)	VUS	VUS	Missense codons	11:5247997-5247997	missense_variant	0	0.487112	0.887366		0.993	0	0.989502	0.993833	0.976002	0.9855	0.866	0.802	0.898	0.85931			0.895	0.8844	3.95	5.80512	0.456194	-3.21	3.865	-6.54	26.1	5.113	0.229	0.982	0.992	8.6358	6.51759
943	NM_000518.4:c.125T>C	HBB:c.125T>C	NM_000518.4:c.125T>C	NP_000509.1:p.(F42S)	VUS	VUS	Missense codons	11:5247997-5247997	missense_variant	0.02	0.487112	0.842064		0.982	0	0.988989	0.998188	0.967503	0.9754	0.87	0.794	0.876	0.86089			0.809	0.8721	3.95	5.5142	0.465851	-3.19	3.865	-6.49	26.1	5.113	0.229	0.982	0.992	8.6358	6.03934
944	NM_000518.4:c.125T>A	HBB:c.125T>A	NM_000518.4:c.125T>A	NP_000509.1:p.(F42Y)	VUS	VUS	Missense codons	11:5247997-5247997	missense_variant	0.59	0.487112	0.614277		0.096		0.268332	0.971084	0.80472	-0.1782	0.74	0.577	0.46	0.71431			0.011	0.5036	3.95	2.13279	0.218072	-2.92	0.4	-1.99	20.6	5.113	0.229	0.982	0.992	8.6358	1.66767
945	NM_000518.4:c.124_126delTTC	HBB:c.124_126delTTC	NM_000518.4:c.124_126delTTC	NP_000509.1:p.(F43del)	VUS	P/LP	Inframe indels	11:5247995-5247998	inframe_deletion						0
945	NM_000518.4:c.127_129delTTT	HBB:c.127_129delTTT	NM_000518.4:c.127_129delTTT	NP_000509.1:p.(F43del)	VUS	P/LP	Inframe indels	11:5247992-5247995	inframe_deletion						0																			20.7
946	NM_000518.4:c.131_139del	HBB:c.131_139del	NM_000518.4:c.131_139del	NP_000509.1:p.(E44_F46del)	VUS	P/LP	Inframe indels	11:5247982-5247991	inframe_deletion																									21.4
947	NM_000518.4:c.127T>C	HBB:c.127T>C	NM_000518.4:c.127T>C	NP_000509.1:p.(F43L)	VUS	VUS	Missense codons	11:5247995-5247995	missense_variant	0	0.487112	1		0.997	0.01	0.986275	0.999063	0.923208	0.9307	0.936	0.986	0.992	0.96767			0.911	0.9942	5.1	12.3679	0.545401	-7.15	4.65	-5.48	28.6	8.664	1.311	0.94	0.977	14.1449	12.708
948	NM_000518.4:c.127T>G	HBB:c.127T>G	NM_000518.4:c.127T>G	NP_000509.1:p.(F43V)	VUS	VUS	Missense codons	11:5247995-5247995	missense_variant	0	0.487112	1		1	0	0.99713	0.992022	0.985801	0.921	0.939	0.982	0.982	0.96914			0.945	0.9949	5.1	13.3423	0.563649	-7.15	4.65	-6.4	28	8.664	1.311	0.94	0.977	14.1449	13.8589
949	NM_000518.4:c.128T>C	HBB:c.128T>C	NM_000518.4:c.128T>C	NP_000509.1:p.(F43S)	VUS	VUS	Missense codons	11:5247994-5247994	missense_variant	0.02	0.487112	1		1	0	0.998875	0.99875	0.918108	0.9307	0.938	0.978	0.99	0.96761			0.883	0.9942	5.1	12.1356	0.563219	-7.16	4.3	-7.31	29.2	8.664	1.311	0.825	0.96	14.1449	12.5834
950	NM_000518.4:c.130G>C	HBB:c.130G>C	NM_000518.4:c.130G>C	NP_000509.1:p.(E44Q)	VUS	VUS	Missense codons	11:5247992-5247992	missense_variant	0.13	0.487112	0.999994		0.07		0.157421	0.985896	0.50295	0.0106	0.5	0.583	0.825	0.29365			0.258	0.689	4.19	1.45689	0.313565	-3.31	1.9	-1.31	18.97	-0.219	1.025	0.393	0.927	9.1336	1.31805
951	NM_000518.4:c.130G>A	HBB:c.130G>A	NM_000518.4:c.130G>A	NP_000509.1:p.(E44K)	VUS	VUS	Missense codons	11:5247992-5247992	missense_variant	0.21	0.487112	0.999976		0.116	0.01	0.211987	0.996684	0.210779	-0.0779	0.451	0.56	0.579	0.21347			0.053	0.652	4.19	1.3982	0.211638	-3.17	1.965	-1.94	21.8	-0.219	1.025	0.393	0.927	9.1336	1.21521
952	NM_000518.4:c.131A>G	HBB:c.131A>G	NM_000518.4:c.131A>G	NP_000509.1:p.(E44G)	VUS	VUS	Missense codons	11:5247991-5247991	missense_variant	0.54	0.487112	1		0.023	0	0.0578754	0.993826	0.457454	-0.3872	0.49	0.523	0.548	0.12353			0.009	0.5361	1.57	0.914121	0.156303	-3.24	0.655	-2.54	16	0.281	1.137	0.304	0.922	4.1651	0.709393
953	NM_000518.4:c.131A>C	HBB:c.131A>C	NM_000518.4:c.131A>C	NP_000509.1:p.(E44A)	VUS	VUS	Missense codons	11:5247991-5247991	missense_variant	0.57	0.487112	1		0.344	0.01	0.10382	0.986615	0.620138	-0.345	0.438	0.577	0.523	0.1104			0.115	0.546	1.57	0.877826	0.17773	-3.26	1.13	-1.96	15.16	0.281	1.137	0.304	0.922	4.1651	0.659619
954	NM_000518.4:c.134C>G	HBB:c.134C>G	NM_000518.4:c.134C>G	NP_000509.1:p.(S45C)	VUS	VUS	Missense codons	11:5247988-5247988	missense_variant	0.01	0.487112	0.996457		0.934		0.985364	0.977785	0.953705	0.5476	0.691	0.711	0.856	0.08763			0.786	0.8909	-2.4	1.30814	0.397921	-3.21	3.665	-3.69	21.1	-3.446	-0.226	0.179	0.969	10.9796	1.99706
955	NM_000518.4:c.137T>C	HBB:c.137T>C	NM_000518.4:c.137T>C	NP_000509.1:p.(F46S)	VUS	VUS	Missense codons	11:5247985-5247985	missense_variant	0.02	0.487112	1		0.993	0	0.985162	0.998803	0.914409	1.0893	0.907	0.971	0.966	0.94424			0.833	0.9383	5.1	10.6767	0.509197	-3.58	4.47	-6.97	29.3	5.61	1.311	0.976	0.992	14.1449	11.5876
956	NM_000518.4:c.137T>A	HBB:c.137T>A	NM_000518.4:c.137T>A	NP_000509.1:p.(F46Y)	VUS	VUS	Missense codons	11:5247985-5247985	missense_variant	0.01	0.487112	1		0.959		0.980909	0.99666	0.906409	1.0565	0.916	0.945	0.803	0.93992			0.808	0.9201	5.1	9.16049	0.495646	-3.57	3.665	-2.69	27.5	5.61	1.311	0.976	0.992	14.1449	9.56712
957	NM_000518.4:c.137T>G	HBB:c.137T>G	NM_000518.4:c.137T>G	NP_000509.1:p.(F46C)	VUS	VUS	Missense codons	11:5247985-5247985	missense_variant	0	0.487112	1		1	0	0.995322	0.994373	0.985781	1.09	0.952	0.98	0.986	0.93323			0.945	0.9391	5.1	10.7174	0.511857	-3.6	4.47	-7.14	29.3	5.61	1.311	0.976	0.992	14.1449	11.6358
958	NM_000518.4:c.139G>A	HBB:c.139G>A	NM_000518.4:c.139G>A	NP_000509.1:p.(G47R)	VUS	VUS	Missense codons	11:5247983-5247983	missense_variant	0	0.487112	1		1	0	0.999531	0.999387	0.991834	1.042	0.958	0.925	0.854	0.92433			0.945	0.9182	5.1	10.3813	0.501434	-3.4	4.345	-7.45	31	5.619	1.025	0.994	0.994	17.6123	10.7013
959	NM_000518.4:c.140G>A	HBB:c.140G>A	NM_000518.4:c.140G>A	NP_000509.1:p.(G47E)	VUS	VUS	Missense codons	11:5247982-5247982	missense_variant	0	0.487112	1		1	0	0.999531	0.998096	0.988514	1.0649	0.931	0.932	0.935	0.92433			0.945	0.9272	5.1	11.1234	0.499649	-3.37	4.345	-7.45	28	5.619	1.025	0.995	0.995	17.6123	11.6537
960	NM_000518.4:c.142G>A	HBB:c.142G>A	NM_000518.4:c.142G>A	NP_000509.1:p.(D48N)	VUS	VUS	Missense codons	11:5247980-5247980	missense_variant	1	0.487112	0.737989		0.033	0	0.165504	0.993953	0.906209	-0.3329	0.694	0.349	0.442	0.63859			0.002	0.5185	5.1	2.03323	0.0966355	-3.32	1.64	-0.05	20.6	1.608	1.025	0.996	0.993	7.8674	1.51017
961	NM_000518.4:c.142G>C	HBB:c.142G>C	NM_000518.4:c.142G>C	NP_000509.1:p.(D48H)	VUS	VUS	Missense codons	11:5247980-5247980	missense_variant	0.01	0.487112	0.942		0.312		0.968397	0.994997	0.854215	0.6545	0.714	0.74	0.561	0.85298			0.503	0.8317	5.1	3.65702	0.319405	-3.43	3.385	-2.87	23.9	1.608	1.025	0.996	0.993	7.8674	3.27239
962	NM_000518.4:c.142G>T	HBB:c.142G>T	NM_000518.4:c.142G>T	NP_000509.1:p.(D48Y)	VUS	P/LP	Missense codons	11:5247980-5247980	missense_variant	0.04	0.487112	0.971527		0.479	0	0.99435	0.995474	0.890411	0.8782	0.731	0.742	0.789	0.84587			0.507	0.8824	5.1	4.36008	0.412496	-3.45	4.285	-5.25	26.1	1.608	1.025	0.996	0.993	7.8674	4.09475
963	NM_000518.4:c.143A>C	HBB:c.143A>C	NM_000518.4:c.143A>C	NP_000509.1:p.(D48A)	VUS	VUS	Missense codons	11:5247979-5247979	missense_variant	0	0.487112	0.976877		0.121	0.01	0.982761	0.989534	0.689931	0.6953	0.73	0.749	0.655	0.94365			0.454	0.8263	5.1	3.87499	0.294122	-3.41	3.735	-4.84	24.6	5.708	1.137	0.995	0.991	14.1449	3.44973
964	NM_000518.4:c.143A>G	HBB:c.143A>G	NM_000518.4:c.143A>G	NP_000509.1:p.(D48G)	VUS	VUS	Missense codons	11:5247979-5247979	missense_variant	0	0.487112	0.983155		0.236	0	0.9646	0.996892	0.962554	0.5578	0.657	0.705	0.607	0.92827			0.468	0.7842	5.1	3.57121	0.280523	-3.26	2.74	-3.59	25	5.708	1.137	0.995	0.991	14.1449	3.07542
965	NM_000518.4:c.143A>T	HBB:c.143A>T	NM_000518.4:c.143A>T	NP_000509.1:p.(D48V)	VUS	P/LP	Missense codons	11:5247979-5247979	missense_variant	0	0.487112	0.999998		0.859		0.994667	0.993836	0.971903	1.0632	0.77	0.935	0.875	0.94137			0.776	0.9364	5.1	5.63269	0.495754	-3.44	4.285	-5.81	28.2	5.708	1.137	0.995	0.991	14.1449	5.44956
966	NM_000518.4:c.146T>G	HBB:c.146T>G	NM_000518.4:c.146T>G	NP_000509.1:p.(L49R)	VUS	VUS	Missense codons	11:5247976-5247976	missense_variant	0	0.487112	1		0.999	0	0.998184	0.99767	0.978627	1.09	0.934	0.982	0.96	0.96914			0.935	0.9391	5.1	11.9943	0.529003	-3.52	4.15	-5.58	28	8.664	1.311	0.983	0.986	14.1449	12.6347
967	NM_000518.4:c.146T>C	HBB:c.146T>C	NM_000518.4:c.146T>C	NP_000509.1:p.(L49P)	VUS	VUS	Missense codons	11:5247976-5247976	missense_variant	0.01	0.487112	1		0.992	0	0.990435	0.999033	0.852415	1.0893	0.919	0.986	0.975	0.96767			0.853	0.9383	5.1	11.9258	0.527726	-3.54	4.495	-6.5	28	8.664	1.311	0.983	0.986	14.1449	12.5574
968	NM_000518.4:c.149C>G	HBB:c.149C>G	NM_000518.4:c.149C>G	NP_000509.1:p.(S50C)	VUS	VUS	Missense codons	11:5247973-5247973	missense_variant	0.01	0.487112	0.99976		0.617		0.985511	0.990043	0.861914	1.0126	0.905	0.782	0.639	0.85147			0.62	0.9118	5.1	4.76009	0.259608	-3.55	3.4	-3.89	25.4	2.3	1.175	0.922	0.962	17.6123	4.64192
969	NM_000518.4:c.149C>T	HBB:c.149C>T	NM_000518.4:c.149C>T	NP_000509.1:p.(S50F)	VUS	VUS	Missense codons	11:5247973-5247973	missense_variant	0	0.487112	0.999928		0.85	0	0.970872	0.998182	0.911809	1.026	0.932	0.879	0.845	0.82541			0.772	0.9167	5.1	5.67368	0.457598	-3.53	3.48	-5.14	26.2	2.3	1.175	0.922	0.962	17.6123	5.76002
970	NM_000518.4:c.151A>T	HBB:c.151A>T	NM_000518.4:c.151A>T	NP_000509.1:p.(T51S)	VUS	VUS	Missense codons	11:5247971-5247971	missense_variant	1	0.487112	0.999999		0.003		0.0308066	0.688705	0.423358	-0.5639	0.398	0.507	0.489	0.0918			0	0.3141	-9.96	0.0140804	-0.0927267	-3.11	-1.06	1.33	0.004	-0.477	-2.088	0.392	0.903	15.0551	0.00749874
973	NM_000518.4:c.155C>A	HBB:c.155C>A	NM_000518.4:c.155C>A	NP_000509.1:p.(P52H)	VUS	VUS	Missense codons	11:5247967-5247967	missense_variant	0.07	0.487112	0.999783		0.065	0	0.948016	0.995128	0.935306	0.0947	0.451	0.48	0.619	0.43093			0.324	0.7393	5.1	1.92703	0.234163	-3.14	2.93	-3.07	19.51	3.628	1.175	0.356	0.854	11.0997	1.94205
974	NM_000518.4:c.155C>G	HBB:c.155C>G	NM_000518.4:c.155C>G	NP_000509.1:p.(P52R)	VUS	P/LP	Missense codons	11:5247967-5247967	missense_variant	0.07	0.487112	0.999612		0.164		0.861333	0.99729	0.944206	0.1822	0.559	0.562	0.83	0.46278			0.334	0.7634	5.1	2.02552	0.388413	-3.12	2.93	-2.91	19.06	3.628	1.175	0.356	0.854	11.0997	2.09496
975	NM_000518.4:c.157G>T	HBB:c.157G>T	NM_000518.4:c.157G>T	NP_000509.1:p.(D53Y)	VUS	VUS	Missense codons	11:5247965-5247965	missense_variant	0	0.487112	1		0.923	0.01	0.884863	0.984041	0.906209	0.5814	0.421	0.614	0.576	0.08552			0.817	0.8428	-4.78	0.491975	0.202927	-3.29	2.865	-2.81	18.1	-1.647	-0.285	0.181	0.725	2.812	0.664936
976	NM_000518.4:c.157G>C	HBB:c.157G>C	NM_000518.4:c.157G>C	NP_000509.1:p.(D53H)	VUS	VUS	Missense codons	11:5247965-5247965	missense_variant	0.03	0.487112	1		0.95		0.605453	0.983859	0.542746	0.6337	0.492	0.645	0.492	0.12625			0.758	0.8525	-4.78	0.489622	0.171975	-3.29	2.52	-1.97	17.03	-1.647	-0.285	0.181	0.725	2.812	0.66079
977	NM_000518.4:c.157G>A	HBB:c.157G>A	NM_000518.4:c.157G>A	NP_000509.1:p.(D53N)	VUS	B/LB	Missense codons	11:5247965-5247965	missense_variant	0.05	0.487112	1		0.093	0	0.990798	0.956192	0.630737	-0.2795	0.534	0.4	0.496	0.07346			0.352	0.6514	-4.78	0.241608	0.0295117	-3.25	1.825	-0.42	10.63	-1.647	-0.285	0.181	0.725	2.812	0.258809
978	NM_000518.4:c.158A>G	HBB:c.158A>G	NM_000518.4:c.158A>G	NP_000509.1:p.(D53G)	VUS	VUS	Missense codons	11:5247964-5247964	missense_variant	0.08	0.487112	1		0.083	0	0.989477	0.733882	0.562644	-0.472	0.53	0.526	0.448	0.11451			0.306	0.6048	-10.2	0.0292297	0.251289	-3.24	1.115	-1.12	0.269	0.052	-0.686	0.163	0.689	16.5419	0.0310909
979	NM_000518.4:c.158A>C	HBB:c.158A>C	NM_000518.4:c.158A>C	NP_000509.1:p.(D53A)	VUS	VUS	Missense codons	11:5247964-5247964	missense_variant	0.97	0.487112	1		0.018	0	0.105251	0.717307	0.304669	-0.5436	0.392	0.549	0.431	0.03549			0.001	0.5292	-10.2	0.0223765	0.0827749	-3.15	0.055	-0.32	0.003	0.052	-0.686	0.163	0.689	16.5419	0.0208566
980	NM_000518.4:c.158A>T	HBB:c.158A>T	NM_000518.4:c.158A>T	NP_000509.1:p.(D53V)	VUS	VUS	Missense codons	11:5247964-5247964	missense_variant	0.02	0.487112	1		0.68		0.318523	0.875868	0.587141	0.4025	0.409	0.594	0.533	0.10453			0.625	0.8367	-10.2	0.0747867	0.191644	-3.28	2.17	-2.22	11.62	0.052	-0.686	0.163	0.689	16.5419	0.119365
982	NM_000518.4:c.160G>A	HBB:c.160G>A	NM_000518.4:c.160G>A	NP_000509.1:p.(A54T)	VUS	VUS	Missense codons	11:5247962-5247962	missense_variant	0.01	0.487112	1		0.998	0.02	0.994194	0.999082	0.947705	1.042	0.924	0.841	0.869	0.92496			0.88	0.9182	5.1	6.29465	0.387631	-3.24	3.94	-3.81	26.3	3.689	1.025	0.198	0.706	17.6123	7.46677
983	NM_000518.4:c.164T>A	HBB:c.164T>A	NM_000518.4:c.164T>A	NP_000509.1:p.(V55D)	VUS	P/LP	Missense codons	11:5247958-5247958	missense_variant	0	0.487112	0.999938		0.998		0.992871	0.981745	0.974903	0.9073	0.796	0.855	0.677	0.96182			0.919	0.8618	5.1	4.83008	0.468087	-3.37	3.27	-5.89	25.1	6.723	1.311	0.122	0.703	14.1449	5.46844
984	NM_000518.4:c.167T>A	HBB:c.167T>A	NM_000518.4:c.167T>A	NP_000509.1:p.(M56K)	VUS	VUS	Missense codons	11:5247955-5247955	missense_variant	0.06	0.487112	1		0.883		0.949196	0.979463	0.850515	0.196	0.761	0.608	0.51	0.21915			0.667	0.7943	5.1	2.31483	0.351031	-2.89	2.785	-4.19	22.2	1.617	1.311	0.067	0.651	8.7478	2.91038
985	NM_000518.4:c.169G>T	HBB:c.169G>T	NM_000518.4:c.169G>T	NP_000509.1:p.(G57C)	VUS	VUS	Missense codons	11:5247953-5247953	missense_variant	0.01	0.487112	1		0.994	0	0.953392	0.978899	0.886711	0.4318	0.782	0.587	0.843	0.14298			0.858	0.8643	-10.2	0.513371	0.366158	-3.49	3.395	-5.6	16.26	-1.571	-0.753	0.007	0.505	3.4115	0.952347
986	NM_000518.4:c.169G>C	HBB:c.169G>C	NM_000518.4:c.169G>C	NP_000509.1:p.(G57R)	VUS	VUS	Missense codons	11:5247953-5247953	missense_variant	0.02	0.487112	1		0.877		0.961112	0.974847	0.948605	0.6504	0.771	0.635	0.841	0.15595			0.725	0.8884	-10.2	0.351877	0.359703	-3.44	3.19	-4.46	14.96	-1.571	-0.753	0.007	0.505	3.4115	0.625627
988	NM_000518.4:c.170G>A	HBB:c.170G>A	NM_000518.4:c.170G>A	NP_000509.1:p.(G57D)	VUS	B/LB	Missense codons	11:5247952-5247952	missense_variant	0.01	0.487112	1		0.624	0.09	0.523381	0.988501	0.846715	0.5364	0.808	0.636	0.575	0.12684			0.623	0.8193	-2.81	0.601473	0.141485	-3.36	2.26	-3.75	17.36	0.016	-0.273	0.006	0.497	7.054	0.671769
989	NM_000518.4:c.170_181del	HBB:c.170_181del	NM_000518.4:c.170_181del	NP_000509.1:p.(G57_K60del)	VUS	P/LP	Inframe indels	11:5247940-5247952	inframe_deletion																									20.3
990	NM_000518.4:c.172A>C	HBB:c.172A>C	NM_000518.4:c.172A>C	NP_000509.1:p.(N58H)	VUS	VUS	Missense codons	11:5247950-5247950	missense_variant	0	0.487112	0.999999		1	0	0.990338	0.995613	0.89951	1.0615	0.848	0.814	0.893	0.95434			0.945	0.9229	5.1	5.42644	0.304551	-3.52	3.805	-4.62	24.3	7.295	1.137	0.047	0.518	14.1449	6.71242
991	NM_000518.4:c.172A>G	HBB:c.172A>G	NM_000518.4:c.172A>G	NP_000509.1:p.(N58D)	VUS	VUS	Missense codons	11:5247950-5247950	missense_variant	0.02	0.487112	0.999998		0.983	0.01	0.988194	0.997787	0.939506	1.0281	0.803	0.8	0.844	0.94807			0.812	0.9093	5.1	5.11031	0.211578	-3.43	3.455	-4.25	24.6	7.295	1.137	0.047	0.518	14.1449	6.10615
992	NM_000518.4:c.173A>C	HBB:c.173A>C	NM_000518.4:c.173A>C	NP_000509.1:p.(N58T)	VUS	VUS	Missense codons	11:5247949-5247949	missense_variant	0	0.487112	0.999999		1	0	0.988505	0.994543	0.981202	1.0872	0.687	0.792	0.869	0.95434			0.945	0.9366	5.1	5.89814	0.301814	-3.49	3.66	-5.52	24.5	5.606	1.137	0.058	0.525	14.1449	7.6101
993	NM_000518.4:c.174C>A	HBB:c.174C>A	NM_000518.4:c.174C>A	NP_000509.1:p.(N58K)	VUS	VUS	Missense codons	11:5247948-5247948	missense_variant	0	0.487112	0.689619		1	0	0.987489	0.982176	0.89771	1.1126	0.877	0.639	0.944	0.17496			0.945	0.9248	-7.69	1.03454	0.167728	-3.5	4.005	-5.53	17.18	-0.246	-0.235	0.058	0.523	17.2276	1.78148
993	NM_000518.4:c.174C>G	HBB:c.174C>G	NM_000518.4:c.174C>G	NP_000509.1:p.(N58K)	VUS	VUS	Missense codons	11:5247948-5247948	missense_variant	0	0.487112	0.712466		1		0.981701	0.982231	0.89771	1.1133	0.877	0.637	0.944	0.20865			0.945	0.9248	-7.69	1.03454	0.16777	-3.5	4.005	-5.53	17.12	-0.246	-0.235	0.058	0.523	17.2276	1.78148
994	NM_000518.4:c.176C>A	HBB:c.176C>A	NM_000518.4:c.176C>A	NP_000509.1:p.(P59H)	VUS	VUS	Missense codons	11:5247946-5247946	missense_variant	0	0.487112	0.881637		0.557	0	0.816562	0.993298	0.766023	0.6679	0.667	0.635	0.621	0.79795			0.635	0.8678	3.18	2.25575	0.265954	-3.29	3.185	-6.9	23	2.098	1.175	0.264	0.619	11.0795	2.66024
995	NM_000518.4:c.176C>G	HBB:c.176C>G	NM_000518.4:c.176C>G	NP_000509.1:p.(P59R)	VUS	VUS	Missense codons	11:5247946-5247946	missense_variant	0	0.487112	0.801926		0.959		0.981148	0.996761	0.822218	0.7052	0.723	0.703	0.829	0.79751			0.847	0.9065	3.18	3.26055	0.431945	-3.28	3.535	-6.72	23.2	2.098	1.175	0.264	0.619	11.0795	4.33832
996	NM_000518.4:c.178A>G	HBB:c.178A>G	NM_000518.4:c.178A>G	NP_000509.1:p.(K60E)	VUS	VUS	Missense codons	11:5247944-5247944	missense_variant	0.01	0.487112	0.981953		0.934	0.12	0.969782	0.998442	0.806719	0.8736	0.72	0.812	0.859	0.83044			0.786	0.8541	3.95	3.19908	0.42385	-3.14	3.21	-2.7	23.6	2.956	1.137	0.377	0.695	11.232	4.01988
997	NM_000518.4:c.179A>C	HBB:c.179A>C	NM_000518.4:c.179A>C	NP_000509.1:p.(K60T)	VUS	VUS	Missense codons	11:5247943-5247943	missense_variant	0	0.487112	0.992819		0.978	0.07	0.987811	0.99746	0.966803	0.9459	0.673	0.729	0.659	0.84937			0.865	0.8816	5.1	4.33791	0.2749	-3.26	3.555	-4.21	24	2.845	1.137	0.391	0.708	9.3355	5.21331
998	NM_000518.4:c.180G>C	HBB:c.180G>C	NM_000518.4:c.180G>C	NP_000509.1:p.(K60N)	VUS	VUS	Missense codons	11:5247942-5247942	missense_variant	0.06	0.487112	0.994138		0.705		0.882628	0.986986	0.757524	0.2393	0.708	0.784	0.847	0.37502			0.577	0.7509	-9.44	0.559801	0.117025	-3.26	2.82	-3.3	13.2	-0.258	-1.265	0.386	0.713	4.9839	0.825343
998	NM_000518.4:c.180G>T	HBB:c.180G>T	NM_000518.4:c.180G>T	NP_000509.1:p.(K60N)	VUS	VUS	Missense codons	11:5247942-5247942	missense_variant	0.06	0.487112	0.993874		0.705	0	0.882628	0.988168	0.757524	0.2393	0.708	0.784	0.847	0.38354			0.577	0.7509	-9.44	0.559801	0.11701	-3.26	2.82	-3.3	13.52	-0.258	-1.265	0.386	0.713	4.9839	0.825343
999	NM_000518.4:c.181G>C	HBB:c.181G>C	NM_000518.4:c.181G>C	NP_000509.1:p.(V61L)	VUS	VUS	Missense codons	11:5247941-5247941	missense_variant	0	0.487112	0.999992		0.84		0.98788	0.998033	0.89971	0.8713	0.702	0.76	0.661	0.93501			0.766	0.8539	5.1	6.38685	0.296891	-3.18	2.535	-2.75	25.3	3.64	1.025	0.628	0.731	17.6123	6.26114
1000	NM_000518.4:c.182T>C	HBB:c.182T>C	NM_000518.4:c.182T>C	NP_000509.1:p.(V61A)	VUS	VUS	Missense codons	11:5247940-5247940	missense_variant	0.01	0.487112	0.999997		0.999	0	0.996852	0.998753	0.836716	1.0355	0.892	0.952	0.72	0.96756			0.896	0.9084	5.1	10.1233	0.51383	-3.35	3.725	-3.82	26.2	8.664	1.311	0.721	0.741	14.1449	10.5131
1002	NM_000518.4:c.184A>C	HBB:c.184A>C	NM_000518.4:c.184A>C	NP_000509.1:p.(K62Q)	VUS	VUS	Missense codons	11:5247938-5247938	missense_variant	0.23	0.487112	0.994595		0.129	0	0.194139	0.992233	0.910509	0.109	0.882	0.631	0.618	0.23194			0.053	0.7233	2.68	1.51801	0.209232	-3.38	1.645	-2.37	20.7	0.406	1.137	0.869	0.756	11.3403	1.43825
1003	NM_000518.4:c.184A>G	HBB:c.184A>G	NM_000518.4:c.184A>G	NP_000509.1:p.(K62E)	VUS	VUS	Missense codons	11:5247938-5247938	missense_variant	0.06	0.487112	0.991514		0.885	0.01	0.93007	0.99883	0.967203	0.4841	0.867	0.699	0.58	0.22996			0.668	0.8939	2.68	2.84095	0.278734	-3.35	4.105	-2.8	23.3	0.406	1.137	0.869	0.756	11.3403	3.65977
1004	NM_000518.4:c.185A>T	HBB:c.185A>T	NM_000518.4:c.185A>T	NP_000509.1:p.(K62M)	VUS	VUS	Missense codons	11:5247937-5247937	missense_variant	0.01	0.487112	0.961379		0.936		0.978466	0.995597	0.868613	0.57	0.893	0.693	0.573	0.29191			0.787	0.906	3.92	3.05597	0.385558	-3.5	4.105	-4.47	24.8	0.329	1.137	0.906	0.762	5.8985	3.91901
1005	NM_000518.4:c.186G>C	HBB:c.186G>C	NM_000518.4:c.186G>C	NP_000509.1:p.(K62N)	VUS	VUS	Missense codons	11:5247936-5247936	missense_variant	0.04	0.487112	0.97936		0.693		0.926791	0.997651	0.850115	0.3454	0.882	0.622	0.562	0.24937			0.597	0.8246	2.24	1.6345	0.149214	-3.46	3.415	-3.63	23.3	-1.904	-0.236	0.916	0.76	3.6137	1.92127
1005	NM_000518.4:c.186G>T	HBB:c.186G>T	NM_000518.4:c.186G>T	NP_000509.1:p.(K62N)	VUS	VUS	Missense codons	11:5247936-5247936	missense_variant	0.04	0.487112	0.978009		0.693	0	0.926791	0.997712	0.850115	0.3454	0.882	0.627	0.562	0.21099			0.597	0.8246	2.24	1.6345	0.149223	-3.46	3.415	-3.63	23.4	-1.904	-0.236	0.916	0.76	3.6137	1.92127
1006	NM_000518.4:c.187G>C	HBB:c.187G>C	NM_000518.4:c.187G>C	NP_000509.1:p.(A63P)	VUS	P/LP	Missense codons	11:5247935-5247935	missense_variant	0.01	0.487112	0.950361		0.599		0.982453	0.997509	0.839616	0.9172	0.871	0.799	0.91	0.28467			0.613	0.8757	3.19	2.3494	0.446538	-3.5	3.88	-4.16	23.8	0.342	1.025	0.965	0.77	9.226	2.88783
1007	NM_000518.4:c.188C>A	HBB:c.188C>A	NM_000518.4:c.188C>A	NP_000509.1:p.(A63D)	VUS	VUS	Missense codons	11:5247934-5247934	missense_variant	0.02	0.487112	0.966484		0.952	0	0.978548	0.996836	0.80242	1.0232	0.853	0.801	0.889	0.21585			0.778	0.9063	4.19	3.39211	0.462951	-3.44	3.535	-4.79	24.7	1.29	1.175	0.984	0.773	10.0601	4.2641
1008	NM_000518.4:c.190C>A	HBB:c.190C>A	NM_000518.4:c.190C>A	NP_000509.1:p.(H64N)	P/LP	VUS	Missense codons	11:5247932-5247932	missense_variant	0	0.487112	1		0.998	0	0.997785	0.99295	0.973203	1.0788	0.956	0.924	0.985	0.98534			0.919	0.9697	5.1	14.8551	0.396081	-4.41	4.625	-6.61	26.5	9.095	1.175	0.996	0.776	17.6123	15.0587
1009	NM_000518.4:c.190C>T	HBB:c.190C>T	NM_000518.4:c.190C>T	NP_000509.1:p.(H64Y)	VUS	P/LP	Missense codons	11:5247932-5247932	missense_variant	0	0.487112	1		0.807	0	0.989132	0.998097	0.89841	1.0944	0.953	0.942	0.982	0.98395			0.748	0.9538	5.1	11.2906	0.545963	-4.4	4.275	-5.66	25.8	9.095	1.175	0.996	0.776	17.6123	11.1182
1010	NM_000518.4:c.191A>C	HBB:c.191A>C	NM_000518.4:c.191A>C	NP_000509.1:p.(H64P)	VUS	VUS	Missense codons	11:5247931-5247931	missense_variant	0	0.487112	1		0.999	0	0.999838	0.984066	0.965003	1.0852	0.934	0.983	0.951	0.97846			0.935	0.9672	5.1	10.5697	0.554551	-4.42	4.625	-9.44	25.7	7.368	1.137	0.997	0.775	14.1449	11.8578
1011	NM_000518.4:c.191A>G	HBB:c.191A>G	NM_000518.4:c.191A>G	NP_000509.1:p.(H64R)	VUS	P/LP	Missense codons	11:5247931-5247931	missense_variant	0	0.487112	1		0.996	0	0.998594	0.996956	0.876412	1.0852	0.945	0.983	0.986	0.97728			0.906	0.9672	5.1	10.5566	0.548552	-4.39	4.625	-7.55	25.1	7.368	1.137	0.997	0.775	14.1449	11.8411
1012	NM_000518.4:c.194G>C	HBB:c.194G>C	NM_000518.4:c.194G>C	NP_000509.1:p.(G65A)	VUS	VUS	Missense codons	11:5247928-5247928	missense_variant	0.02	0.487112	1		0.977		0.994866	0.998427	0.920008	0.9584	0.927	0.903	0.663	0.95834			0.802	0.8845	5.1	8.55476	0.474297	-3.09	3.595	-5.67	25.8	5.502	1.025	0.997	0.763	17.6123	8.91555
1013	NM_000518.4:c.194G>A	HBB:c.194G>A	NM_000518.4:c.194G>A	NP_000509.1:p.(G65D)	VUS	P/LP	Missense codons	11:5247928-5247928	missense_variant	0	0.487112	1		1	0	0.998728	0.99866	0.906409	1.0903	0.943	0.941	0.925	0.9671			0.945	0.9479	5.1	10.9275	0.504242	-3.47	4.635	-6.62	27.1	5.502	1.025	0.997	0.763	17.6123	12.174
1014	NM_000518.4:c.196A>C	HBB:c.196A>C	NM_000518.4:c.196A>C	NP_000509.1:p.(K66Q)	VUS	VUS	Missense codons	11:5247926-5247926	missense_variant	0.01	0.487112	0.99966		0.232	0	0.401244	0.979667	0.884012	0.1636	0.778	0.648	0.847	0.52021			0.429	0.7533	-1.14	1.37973	0.343211	-3.16	2.72	-3.17	19.64	0.795	1.137	0.996	0.751	6.3316	1.4526
1016	NM_000518.4:c.197A>T	HBB:c.197A>T	NM_000518.4:c.197A>T	NP_000509.1:p.(K66M)	VUS	VUS	Missense codons	11:5247925-5247925	missense_variant	0	0.487112	0.999995		0.98		0.95985	0.994333	0.862314	0.4363	0.719	0.618	0.607	0.25467			0.869	0.9005	-0.414	2.21024	0.241954	-3.24	3.42	-5.01	23.3	0.26	1.137	0.995	0.742	8.0192	3.21591
1017	NM_000518.4:c.198G>C	HBB:c.198G>C	NM_000518.4:c.198G>C	NP_000509.1:p.(K66N)	VUS	VUS	Missense codons	11:5247924-5247924	missense_variant	0.01	0.487112	0.976683		0.517		0.892389	0.997777	0.90211	0.4264	0.755	0.568	0.597	0.19988			0.58	0.8209	-0.52	1.45634	0.155151	-3.19	3.56	-4.03	22.7	-0.121	0.13	0.991	0.723	3.3243	1.70845
1017	NM_000518.4:c.198G>T	HBB:c.198G>T	NM_000518.4:c.198G>T	NP_000509.1:p.(K66N)	P/LP	VUS	Missense codons	11:5247924-5247924	missense_variant	0.01	0.487112	0.979042		0.517	0	0.892389	0.997939	0.90211	0.4264	0.755	0.567	0.597	0.24102			0.58	0.8209	-0.52	1.45634	0.155142	-3.19	3.56	-4.03	22.9	-0.121	0.13	0.991	0.723	3.3243	1.70845
1018	NM_000518.4:c.199A>G	HBB:c.199A>G	NM_000518.4:c.199A>G	NP_000509.1:p.(K67E)	VUS	P/LP	Missense codons	11:5247923-5247923	missense_variant	0.02	0.487112	0.988926		0.995	0	0.991834	0.998855	0.743426	1.0881	0.975	0.868	0.855	0.9162			0.841	0.9265	5.1	7.5904	0.480033	-3.37	4.35	-3.72	25.6	4.53	1.137	0.988	0.718	14.1449	8.89889
1019	NM_000518.4:c.200A>C	HBB:c.200A>C	NM_000518.4:c.200A>C	NP_000509.1:p.(K67T)	VUS	VUS	Missense codons	11:5247922-5247922	missense_variant	0.16	0.487112	0.991565		0.999	0	0.981685	0.997904	0.945105	0.9199	0.943	0.838	0.762	0.76472			0.55	0.8618	5.1	4.94961	0.39793	-3.28	2.19	-5.6	23.6	2.467	1.137	0.978	0.703	14.1449	5.23428
1020	NM_000518.4:c.201A>T	HBB:c.201A>T	NM_000518.4:c.201A>T	NP_000509.1:p.(K67N)	VUS	VUS	Missense codons	11:5247921-5247921	missense_variant	0.01	0.487112	0.985904		0.999		0.981849	0.996454	0.865613	0.9028	0.972	0.755	0.91	0.2274			0.896	0.8992	-2.82	1.43024	0.153968	-3.39	3.455	-4.66	22.7	-0.983	-0.237	0.944	0.675	11.6962	2.10912
1021	NM_000518.4:c.202G>A	HBB:c.202G>A	NM_000518.4:c.202G>A	NP_000509.1:p.(V68M)	VUS	VUS	Missense codons	11:5247920-5247920	missense_variant	0.02	0.487112	0.999999		0.964	0.01	0.975483	0.998875	0.937606	1.0834	0.936	0.885	0.703	0.92953			0.789	0.9458	5.1	7.40235	0.509265	-4.2	3.365	-2.51	25.5	3.639	1.025	0.938	0.665	17.6123	8.11419
1023	NM_000518.4:c.203T>G	HBB:c.203T>G	NM_000518.4:c.203T>G	NP_000509.1:p.(V68G)	P/LP	VUS	Missense codons	11:5247919-5247919	missense_variant	0	0.487112	1		0.999	0	0.996393	0.996415	0.754025	1.0891	0.951	0.987	0.898	0.98402			0.935	0.9658	5.1	10.0885	0.556874	-4.22	4.52	-6.39	26.1	8.599	1.311	0.919	0.647	14.1449	11.5606
1024	NM_000518.4:c.203T>A	HBB:c.203T>A	NM_000518.4:c.203T>A	NP_000509.1:p.(V68E)	VUS	P/LP	Missense codons	11:5247919-5247919	missense_variant	0.02	0.487112	1		0.936		0.994484	0.989563	0.850515	1.0918	0.939	0.984	0.972	0.98347			0.764	0.9637	5.1	9.7689	0.552824	-4.22	4.52	-5.34	26.1	8.599	1.311	0.919	0.647	14.1449	11.1424
1025	NM_000518.4:c.203T>C	HBB:c.203T>C	NM_000518.4:c.203T>C	NP_000509.1:p.(V68A)	VUS	VUS	Missense codons	11:5247919-5247919	missense_variant	0.01	0.487112	1		0.996	0	0.992192	0.998679	0.90281	1.098	0.943	0.964	0.837	0.98254			0.867	0.9538	5.1	9.41803	0.536484	-4.2	4.17	-3.62	25.5	8.599	1.311	0.919	0.647	14.1449	10.5904
1026	NM_000518.4:c.205C>T	HBB:c.205C>T	NM_000518.4:c.205C>T	NP_000509.1:p.(L69F)	VUS	P/LP	Missense codons	11:5247917-5247917	missense_variant	0.03	0.487112	0.983108		0.905	0	0.959271	0.998278	0.921108	0.6176	0.692	0.742	0.878	0.78561			0.724	0.8574	-0.457	1.92475	0.380334	-3.29	2.735	-2.98	22.4	0.203	0.161	0.676	0.554	4.3918	2.55043
1027	NM_000518.4:c.206T>A	HBB:c.206T>A	NM_000518.4:c.206T>A	NP_000509.1:p.(L69H)	VUS	P/LP	Missense codons	11:5247916-5247916	missense_variant	0	0.487112	0.995219		1		0.994466	0.982485	0.962204	1.0791	0.754	0.864	0.95	0.96344			0.945	0.9314	5.1	5.57735	0.498369	-3.46	4.12	-5.9	24.4	6.646	1.311	0.526	0.454	14.1449	7.05297
1028	NM_000518.4:c.206T>C	HBB:c.206T>C	NM_000518.4:c.206T>C	NP_000509.1:p.(L69P)	VUS	VUS	Missense codons	11:5247916-5247916	missense_variant	0	0.487112	1		1	0	0.994993	0.998376	0.965703	1.0791	0.791	0.911	0.979	0.94756			0.945	0.9314	5.1	5.57735	0.503695	-3.47	4.12	-6.05	24.5	6.646	1.311	0.526	0.454	14.1449	7.05297
1029	NM_000518.4:c.204_209dupGCTCGG	HBB:c.204_209dupGCTCGG	NM_000518.4:c.204_209dupGCTCGG	NP_000509.1:p.(L69_G70dup)	VUS	P/LP	Inframe indels	11:5247917-5247917	inframe_insertion
1030	NM_000518.4:c.208G>A	HBB:c.208G>A	NM_000518.4:c.208G>A	NP_000509.1:p.(G70S)	VUS	B/LB	Missense codons	11:5247914-5247914	missense_variant	0.74	0.487112	1		0.01	0.01	0.0151898	0.644724	0.718928	-0.5916		0.584	0.799	0.02489			0.002	0.4544	-10.2	0.018247	-0.0488073	-3.33	-0.035	1.33	0.002	-1.568	0.178	0.004	0.274	4.1148	0.0211435
1031	NM_000518.4:c.208G>C	HBB:c.208G>C	NM_000518.4:c.208G>C	NP_000509.1:p.(G70R)	VUS	B/LB	Missense codons	11:5247914-5247914	missense_variant	0.49	0.487112	1		0.104		0.179985	0.912195	0.851615	-0.4015	0.193	0.59	0.576	0.07084			0.019	0.5765	-10.2	0.0320557	0.174354	-3.38	0.72	-0.34	0.005	-1.568	0.178	0.004	0.274	4.1148	0.0451001
1032	NM_000518.4:c.209G>A	HBB:c.209G>A	NM_000518.4:c.209G>A	NP_000509.1:p.(G70D)	VUS	B/LB	Missense codons	11:5247913-5247913	missense_variant	0.64	0.487112	1		0.01	0	0.0333693	0.557895	0.689731	-0.5438	0.209	0.564	0.549	0.0294			0.004	0.5581	-10.2	0.117654	0.127665	-3.34	-0.41	0.92	0.213	-1.251	-1.365	0.005	0.283	13.2571	0.137488
1033	NM_000518.4:c.211G>C	HBB:c.211G>C	NM_000518.4:c.211G>C	NP_000509.1:p.(A71P)	VUS	P/LP	Missense codons	11:5247911-5247911	missense_variant	0.02	0.487112	0.979835		0.269		0.801614	0.996339	0.827217	0.6259	0.819	0.679	0.934	0.69181			0.412	0.8795	1.46	1.32773	0.424496	-3.49	3.185	-2.4	17.45	1.149	0.049	0.228	0.357	14.2389	1.55536
1034	NM_000518.4:c.212C>A	HBB:c.212C>A	NM_000518.4:c.212C>A	NP_000509.1:p.(A71D)	VUS	VUS	Missense codons	11:5247910-5247910	missense_variant	0	0.487112	0.630732		0.875	0	0.932914	0.994928	0.949205	1.0005	0.812	0.697	0.924	0.89459			0.784	0.9194	5.1	4.52732	0.474448	-3.49	3.185	-1.94	23.7	4.815	1.175	0.484	0.388	17.6123	5.56883
1035	NM_000518.4:c.212C>G	HBB:c.212C>G	NM_000518.4:c.212C>G	NP_000509.1:p.(A71G)	VUS	VUS	Missense codons	11:5247910-5247910	missense_variant	0.45	0.487112	0.898118		0.525		0.644894	0.992048	0.889711	0.5256	0.769	0.645	0.875	0.93146			0.189	0.8302	5.1	2.69467	0.367394	-3.35	0.91	-1.56	21.1	4.815	1.175	0.484	0.388	17.6123	2.77425
1036	NM_000518.4:c.212C>T	HBB:c.212C>T	NM_000518.4:c.212C>T	NP_000509.1:p.(A71V)	VUS	VUS	Missense codons	11:5247910-5247910	missense_variant	0.01	0.487112	0.868974		0.72	0	0.981795	0.998682	0.79582	0.6636	0.752	0.689	0.874	0.93275			0.667	0.8785	5.1	4.14496	0.424598	-3.41	3.185	-2.67	23.7	4.815	1.175	0.484	0.388	17.6123	4.90398
1037	NM_000518.4:c.215T>C	HBB:c.215T>C	NM_000518.4:c.215T>C	NP_000509.1:p.(F72S)	VUS	VUS	Missense codons	11:5247907-5247907	missense_variant	0.01	0.487112	0.933743		0.995	0	0.985219	0.99842	0.845015	1.101	0.77	0.812	0.605	0.85121			0.863	0.9048	5.1	4.06259	0.469651	-3.38	3.845	-6.65	24.5	3.859	1.311	0.58	0.407	14.1449	5.14761
1038	NM_000518.4:c.219T>A	HBB:c.219T>A	NM_000518.4:c.219T>A	NP_000509.1:p.(S73R)	VUS	P/LP	Missense codons	11:5247903-5247903	missense_variant	0.05	0.487112	0.999999		0.411		0.478448	0.993614	0.948005	0.2973	0.474	0.631	0.861	0.26725			0.478	0.7827	-0.116	0.556104	0.325795	-3.18	2.505	-2.38	14.26	-0.318	-0.04	0.297	0.239	5.4031	0.603637
1039	NM_000518.4:c.220G>T	HBB:c.220G>T	NM_000518.4:c.220G>T	NP_000509.1:p.(D74Y)	VUS	VUS	Missense codons	11:5247902-5247902	missense_variant	0	0.487112	0.84978		0.977	0	0.98786	0.98934	0.922608	0.6437	0.618	0.721	0.624	0.70263			0.863	0.8879	4.2	2.2861	0.424184	-3.19	3.18	-4.95	23	1.276	1.025	0.276	0.198	12.699	3.19635
1040	NM_000518.4:c.220G>A	HBB:c.220G>A	NM_000518.4:c.220G>A	NP_000509.1:p.(D74N)	VUS	B/LB	Missense codons	11:5247902-5247902	missense_variant	0.33	0.487112	0.985048		0.026	0	0.0539207	0.991852	0.741926	-0.1657	0.576	0.348	0.561	0.47779			0.025	0.6185	4.2	1.11699	-0.097129	-3.08	0.965	-1.85	15.44	1.276	1.025	0.276	0.198	12.699	0.994497
1041	NM_000518.4:c.221A>G	HBB:c.221A>G	NM_000518.4:c.221A>G	NP_000509.1:p.(D74G)	VUS	VUS	Missense codons	11:5247901-5247901	missense_variant	0.03	0.487112	0.915206		0.091	0	0.826011	0.988932	0.840716	0.2793	0.557	0.51	0.609	0.66738			0.371	0.7614	5.1	1.5127	0.263222	-3.16	2.835	-4.02	20.8	3.48	1.137	0.218	0.133	14.1449	1.51071
1042	NM_000518.4:c.221A>T	HBB:c.221A>T	NM_000518.4:c.221A>T	NP_000509.1:p.(D74V)	VUS	VUS	Missense codons	11:5247901-5247901	missense_variant	0.02	0.487112	0.999051		0.763		0.965301	0.986059	0.933407	0.8169	0.572	0.66	0.605	0.80812			0.666	0.8361	5.1	2.01373	0.292745	-3.11	2.72	-5.05	23.1	3.48	1.137	0.218	0.133	14.1449	2.37974
1043	NM_000518.4:c.220_228delinsGCTCGGTGCCAG	HBB:c.220_228delinsGCTCGGTGCCAG	NM_000518.4:c.220_228delinsGCTCGGTGCCAG	NP_000509.1:p.(D74_L76delinsARCQ)	VUS	P/LP	Inframe indels	11:5247894-5247901	protein_altering_variant																									26.1
1044	NM_000518.4:c.224_229delGCCTGG	HBB:c.224_229delGCCTGG	NM_000518.4:c.224_229delGCCTGG	NP_000509.1:p.(G75_L76del)	VUS	P/LP	Inframe indels	11:5247892-5247898	inframe_deletion																									15.25
1045	NM_000518.4:c.223G>A	HBB:c.223G>A	NM_000518.4:c.223G>A	NP_000509.1:p.(G75S)	VUS	VUS	Missense codons	11:5247899-5247899	missense_variant	0.03	0.487112	0.998964		0.721	0	0.848993	0.998093	0.868113	0.7578	0.516	0.641	0.577	0.97857			0.626	0.825	5.1	3.53256	0.23061	-3.05	2.825	-2.16	24.1	7.321	1.025	0.027	0.019	17.6123	3.92457
1046	NM_000518.4:c.223G>C	HBB:c.223G>C	NM_000518.4:c.223G>C	NP_000509.1:p.(G75R)	VUS	VUS	Missense codons	11:5247899-5247899	missense_variant	0	0.487112	0.999563		0.993		0.994495	0.998701	0.958404	0.9197	0.708	0.75	0.759	0.98062			0.895	0.8724	5.1	4.64208	0.389125	-3.14	3.63	-4.04	24.1	7.321	1.025	0.027	0.019	17.6123	5.69002
1047	NM_000518.4:c.224G>T	HBB:c.224G>T	NM_000518.4:c.224G>T	NP_000509.1:p.(G75V)	VUS	VUS	Missense codons	11:5247898-5247898	missense_variant	0.01	0.487112	1		0.886	0	0.991413	0.995023	0.812919	0.6847	0.635	0.729	0.598	0.89965			0.752	0.8031	4.13	3.63686	0.424238	-2.95	3.08	-4.02	23.3	5.553	1.025	0.024	0.018	12.1228	4.34388
1048	NM_000518.4:c.224G>A	HBB:c.224G>A	NM_000518.4:c.224G>A	NP_000509.1:p.(G75D)	VUS	P/LP	Missense codons	11:5247898-5247898	missense_variant	0	0.487112	0.99748		0.598	0	0.985987	0.997725	0.820918	0.7266	0.687	0.709	0.919	0.9193			0.651	0.8213	4.13	2.86134	0.433691	-3.15	2.94	-4.05	23.1	5.553	1.025	0.024	0.018	12.1228	3.20658
1049	NM_000518.4:c.226_228delCTG	HBB:c.226_228delCTG	NM_000518.4:c.226_228delCTG	NP_000509.1:p.(L76del)	VUS	P/LP	Inframe indels	11:5247893-5247896	inframe_deletion						0																			14.11
1051	NM_000518.4:c.227T>C	HBB:c.227T>C	NM_000518.4:c.227T>C	NP_000509.1:p.(L76P)	VUS	P/LP	Missense codons	11:5247895-5247895	missense_variant	0	0.487112	0.98268		0.984	0	0.990554	0.997107	0.928907	1.0047	0.623	0.786	0.649	0.93867			0.875	0.893	5.1	3.71867	0.471236	-3.42	3.275	-4.86	23.3	6.873	1.311	0.013	0.014	14.1449	4.59419
1052	NM_000518.4:c.227T>G	HBB:c.227T>G	NM_000518.4:c.227T>G	NP_000509.1:p.(L76R)	VUS	VUS	Missense codons	11:5247895-5247895	missense_variant	0	0.487112	0.99861		0.953	0	0.98158	0.995961	0.949005	0.5312	0.594	0.701	0.782	0.96007			0.841	0.8876	5.1	3.74658	0.491613	-3.41	3.625	-4.79	23.5	6.873	1.311	0.013	0.014	14.1449	4.6605
1053	NM_000518.4:c.229G>C	HBB:c.229G>C	NM_000518.4:c.229G>C	NP_000509.1:p.(A77P)	VUS	VUS	Missense codons	11:5247893-5247893	missense_variant	0	0.487112	1		0.727		0.391852	0.941593	0.941306	0.4084	0.516	0.567	0.848	0.49461			0.709	0.7889	-4.14	0.34423	0.357305	-3.25	1.415	-0.15	12.56	1.485	-3.926	0.001	0.008	13.2004	0.345321
1054	NM_000518.4:c.230C>T	HBB:c.230C>T	NM_000518.4:c.230C>T	NP_000509.1:p.(A77V)	VUS	VUS	Missense codons	11:5247892-5247892	missense_variant	0	0.487112	1		0.354	0	0.19352	0.902015	0.956404	0.016	0.333	0.553	0.645	0.71485			0.556	0.6987	1.5	0.566664	0.213818	-3.22	1.415	-1.04	11.79	2.436	-0.697	0.017	0.039	7.3639	0.44311
1055	NM_000518.4:c.230C>A	HBB:c.230C>A	NM_000518.4:c.230C>A	NP_000509.1:p.(A77D)	VUS	VUS	Missense codons	11:5247892-5247892	missense_variant	0.02	0.487112	1		0.474	0	0.209956	0.738968	0.80202	-0.1894	0.478	0.582	0.639	0.08354			0.539	0.5896	1.5	0.492536	0.33504	-3.13	0.265	0.17	14.79	2.436	-0.697	0.017	0.039	7.3639	0.345949
1057	NM_000518.4:c.232C>T	HBB:c.232C>T	NM_000518.4:c.232C>T	NP_000509.1:p.(H78Y)	VUS	VUS	Missense codons	11:5247890-5247890	missense_variant	0	0.487112	0.986858		0.981	0	0.969152	0.993006	0.963904	0.4648	0.728	0.732	0.832	0.56921			0.87	0.8784	1.89	1.85251	0.380637	-3.27	3.06	-4.06	19.24	0.993	0.185	0.455	0.377	13.7578	2.64745
1058	NM_000518.4:c.232C>G	HBB:c.232C>G	NM_000518.4:c.232C>G	NP_000509.1:p.(H78D)	VUS	VUS	Missense codons	11:5247890-5247890	missense_variant	0.04	0.487112	0.966419		0.925		0.827878	0.925217	0.585341	0.5049	0.759	0.716	0.868	0.49356			0.722	0.8778	1.89	1.70097	0.391705	-3.23	3.06	-4.02	19.07	0.993	0.185	0.455	0.377	13.7578	2.33034
1059	NM_000518.4:c.233A>T	HBB:c.233A>T	NM_000518.4:c.233A>T	NP_000509.1:p.(H78L)	VUS	VUS	Missense codons	11:5247889-5247889	missense_variant	0.04	0.487112	0.997699		0.225		0.988455	0.95365	0.936906	0.6206	0.626	0.705	0.605	0.97761			0.371	0.7966	5.1	2.55355	0.300596	-3.15	2.97	-6.79	22.4	7.455	1.137	0.701	0.447	14.1449	2.6015
1060	NM_000518.4:c.233A>G	HBB:c.233A>G	NM_000518.4:c.233A>G	NP_000509.1:p.(H78R)	VUS	VUS	Missense codons	11:5247889-5247889	missense_variant	0	0.487112	0.98953		0.893	0	0.976512	0.966545	0.80432	0.97	0.681	0.804	0.617	0.97681			0.796	0.8772	5.1	4.07629	0.348133	-3.23	3.315	-4.01	23.1	7.455	1.137	0.701	0.447	14.1449	4.74096
1061	NM_000518.4:c.234C>G	HBB:c.234C>G	NM_000518.4:c.234C>G	NP_000509.1:p.(H78Q)	VUS	VUS	Missense codons	11:5247888-5247888	missense_variant	0.01	0.487112	0.928126		0.434		0.915519	0.960232	0.762324	0.4174	0.655	0.656	0.584	0.88308			0.547	0.7938	-1.73	1.36386	0.254432	-3.15	3.175	-3.8	15.4	1.361	0.229	0.775	0.485	6.2516	1.64888
1062	NM_000518.4:c.236T>G	HBB:c.236T>G	NM_000518.4:c.236T>G	NP_000509.1:p.(L79R)	VUS	VUS	Missense codons	11:5247886-5247886	missense_variant	0	0.487112	0.999237		0.995	0	0.987938	0.997405	0.959104	1.0693	0.768	0.912	0.889	0.98495			0.902	0.9294	5.1	5.90036	0.492921	-3.69	3.58	-4.91	25.1	8.677	1.311	0.924	0.606	14.1449	7.07304
1063	NM_000518.4:c.238G>C	HBB:c.238G>C	NM_000518.4:c.238G>C	NP_000509.1:p.(D80H)	VUS	P/LP	Missense codons	11:5247884-5247884	missense_variant	0.01	0.487112	1		0.962		0.98517	0.994779	0.913609	1.0726	0.924	0.914	0.978	0.98081			0.81	0.9353	5.1	7.54642	0.528689	-3.82	4.2	-6.05	25.9	7.346	1.025	0.974	0.684	17.6123	8.5886
1064	NM_000518.4:c.238G>A	HBB:c.238G>A	NM_000518.4:c.238G>A	NP_000509.1:p.(D80N)	VUS	VUS	Missense codons	11:5247884-5247884	missense_variant	0.03	0.487112	1		0.805	0	0.992456	0.999134	0.931507	1.0419	0.922	0.764	0.819	0.97878			0.667	0.9134	5.1	5.5625	0.222803	-3.76	3.3	-4.15	25.8	7.346	1.025	0.974	0.684	17.6123	5.71566
1065	NM_000518.4:c.238G>T	HBB:c.238G>T	NM_000518.4:c.238G>T	NP_000509.1:p.(D80Y)	VUS	VUS	Missense codons	11:5247884-5247884	missense_variant	0	0.487112	1		0.998	0	0.998568	0.993632	0.985401	1.0916	0.916	0.907	0.964	0.98036			0.919	0.9541	5.1	8.99339	0.532822	-3.85	4.545	-7.96	26.8	7.346	1.025	0.974	0.684	17.6123	10.9312
1066	NM_000518.4:c.239A>G	HBB:c.239A>G	NM_000518.4:c.239A>G	NP_000509.1:p.(D80G)	VUS	VUS	Missense codons	11:5247883-5247883	missense_variant	0.01	0.487112	1		0.902	0	0.987773	0.998388	0.914409	0.9985	0.92	0.923	0.946	0.97862			0.762	0.8966	5.1	5.02554	0.514929	-3.73	3.16	-6.1	25.8	7.449	1.137	0.984	0.719	14.1449	5.15049
1067	NM_000518.4:c.241A>T	HBB:c.241A>T	NM_000518.4:c.241A>T	NP_000509.1:p.(N81Y)	VUS	VUS	Missense codons	11:5247881-5247881	missense_variant	0	0.487112	0.945905		0.346		0.987072	0.990138	0.726827	0.657	0.732	0.715	0.719	0.85594			0.554	0.8642	-0.0512	1.34278	0.268182	-3.51	4.13	-5.69	18.73	0.386	0.204	0.99	0.777	9.2322	1.41415
1068	NM_000518.4:c.243C>A	HBB:c.243C>A	NM_000518.4:c.243C>A	NP_000509.1:p.(N81K)	VUS	VUS	Missense codons	11:5247879-5247879	missense_variant	0.01	0.487112	0.996714		0.258	0	0.966905	0.995426	0.747125	0.7	0.714	0.728	0.635	0.94653			0.433	0.8336	4.19	2.92707	0.192266	-3.44	3.78	-4	22.8	4.514	1.175	0.998	0.903	9.3018	2.82674
1068	NM_000518.4:c.243C>G	HBB:c.243C>G	NM_000518.4:c.243C>G	NP_000509.1:p.(N81K)	VUS	VUS	Missense codons	11:5247879-5247879	missense_variant	0.01	0.487112	0.996811		0.258		0.951198	0.995083	0.747125	0.7	0.714	0.728	0.635	0.95712			0.433	0.8336	4.19	2.92707	0.192273	-3.44	3.78	-4	22.8	4.514	1.175	0.998	0.903	9.3018	2.82674
1069	NM_000518.4:c.245T>G	HBB:c.245T>G	NM_000518.4:c.245T>G	NP_000509.1:p.(L82R)	VUS	P/LP	Missense codons	11:5247877-5247877	missense_variant	0	0.487112	0.986406		1	0	0.996849	0.997479	0.973903	1.0254	0.904	0.911	0.911	0.98141			0.945	0.9239	3.96	6.52756	0.5213	-3.46	4.335	-5.1	25	8.684	1.311	1	0.945	10.529	7.89584
1070	NM_000518.4:c.245T>A	HBB:c.245T>A	NM_000518.4:c.245T>A	NP_000509.1:p.(L82H)	VUS	P/LP	Missense codons	11:5247877-5247877	missense_variant	0.01	0.487112	0.976923		1		0.99733	0.983049	0.810219	0.9314	0.907	0.837	0.863	0.98019			0.905	0.8842	3.96	5.4746	0.431943	-3.45	2.63	-5.73	24.9	8.684	1.311	1	0.945	10.529	6.02369
1071	NM_000518.4:c.247A>C	HBB:c.247A>C	NM_000518.4:c.247A>C	NP_000509.1:p.(K83Q)	VUS	P/LP	Missense codons	11:5247875-5247875	missense_variant	0.01	0.487112	1		0.704	0	0.977919	0.994612	0.880612	0.9102	0.914	0.909	0.915	0.97973			0.659	0.855	5.1	5.42881	0.492784	-3.26	3.595	-3.65	25.2	7.455	1.137	1	0.956	14.1449	5.34512
1072	NM_000518.4:c.247A>G	HBB:c.247A>G	NM_000518.4:c.247A>G	NP_000509.1:p.(K83E)	VUS	VUS	Missense codons	11:5247875-5247875	missense_variant	0.01	0.487112	1		0.608	0	0.978751	0.998391	0.851615	0.8418	0.909	0.908	0.902	0.97862			0.616	0.8467	5.1	4.41737	0.484666	-3.21	3.135	-3.63	25.4	7.455	1.137	1	0.956	14.1449	4.12576
1073	NM_000518.4:c.248A>C	HBB:c.248A>C	NM_000518.4:c.248A>C	NP_000509.1:p.(K83T)	VUS	P/LP	Missense codons	11:5247874-5247874	missense_variant	0	0.487112	1		0.989	0	0.993831	0.998003	0.940706	0.9298	0.905	0.935	0.916	0.95954			0.884	0.8703	5.1	5.70834	0.456657	-3.28	2.585	-5.57	25.9	3.799	1.137	1	0.956	14.1449	6.01865
1074	NM_000518.4:c.248A>T	HBB:c.248A>T	NM_000518.4:c.248A>T	NP_000509.1:p.(K83M)	VUS	P/LP	Missense codons	11:5247874-5247874	missense_variant	0	0.487112	1		0.993		0.990918	0.995877	0.867113	1.0335	0.914	0.946	0.872	0.95819			0.895	0.9073	5.1	6.66522	0.484216	-3.33	3.595	-5.59	26.6	3.799	1.137	1	0.956	14.1449	7.5578
1075	NM_000518.4:c.248A>G	HBB:c.248A>G	NM_000518.4:c.248A>G	NP_000509.1:p.(K83R)	VUS	VUS	Missense codons	11:5247874-5247874	missense_variant	0.01	0.487112	1		0.49	0	0.855181	0.998673	0.884611	0.7618	0.886	0.869	0.51	0.90992			0.569	0.8386	5.1	3.52487	0.406781	-3.24	2.695	-2.69	25.2	3.799	1.137	1	0.956	14.1449	3.29929
1076	NM_000518.4:c.249G>C	HBB:c.249G>C	NM_000518.4:c.249G>C	NP_000509.1:p.(K83N)	VUS	VUS	Missense codons	11:5247873-5247873	missense_variant	0.02	0.487112	1		0.85		0.99004	0.998617	0.971303	0.9316	0.892	0.839	0.802	0.93953			0.71	0.8677	4.32	4.1345	0.195255	-3.2	3.245	-4.62	24.8	1.901	1.025	1	0.953	13.2852	4.59414
1076	NM_000518.4:c.249G>T	HBB:c.249G>T	NM_000518.4:c.249G>T	NP_000509.1:p.(K83N)	VUS	VUS	Missense codons	11:5247873-5247873	missense_variant	0.02	0.487112	1		0.85	0	0.992428	0.998765	0.971303	0.9316	0.892	0.837	0.802	0.93761			0.71	0.8677	4.32	4.1345	0.195254	-3.2	3.245	-4.62	24.8	1.901	1.025	1	0.953	13.2852	4.59414
1077	NM_000518.4:c.250G>C	HBB:c.250G>C	NM_000518.4:c.250G>C	NP_000509.1:p.(G84R)	VUS	VUS	Missense codons	11:5247872-5247872	missense_variant	0.03	0.487112	0.871542		0.989		0.989009	0.999162	0.767723	0.9926	0.704	0.64	0.65	0.3944			0.804	0.874	4.3	3.01043	0.271456	-3.2	3.58	-4.15	24.5	0.057	1.025	1	0.948	7.6835	3.76136
1078	NM_000518.4:c.250G>T	HBB:c.250G>T	NM_000518.4:c.250G>T	NP_000509.1:p.(G84C)	VUS	B/LB	Missense codons	11:5247872-5247872	missense_variant	0	0.487112	0.929727		0.993	0	0.965906	0.996781	0.922208	0.9788	0.653	0.612	0.644	0.36511			0.895	0.8841	4.3	3.18444	0.272141	-3.25	3.58	-5.68	24.9	0.057	1.025	1	0.948	7.6835	4.06059
1079	NM_000518.4:c.251G>A	HBB:c.251G>A	NM_000518.4:c.251G>A	NP_000509.1:p.(G84D)	VUS	B/LB	Missense codons	11:5247871-5247871	missense_variant	0.17	0.487112	0.591898		0.57	0	0.442803	0.997721	0.686231	0.668	0.71	0.633	0.857	0.21037			0.254	0.8322	2.3	1.50578	0.301047	-3.19	2.395	-2.5	21.9	-0.401	1.025	1	0.938	4.3619	1.61828
1080	NM_000518.4:c.253A>G	HBB:c.253A>G	NM_000518.4:c.253A>G	NP_000509.1:p.(T85A)	VUS	VUS	Missense codons	11:5247869-5247869	missense_variant	0.23	0.487112	0.991318		0.024	0	0.0679732	0.965583	0.745225	-0.304	0.63	0.564	0.524	0.80314			0.043	0.5457	2.86	1.57699	0.16736	-3.06	0.87	-3.63	16.48	0.762	1.137	1	0.915	4.8424	1.34833
1081	NM_000518.4:c.254C>A	HBB:c.254C>A	NM_000518.4:c.254C>A	NP_000509.1:p.(T85N)	VUS	VUS	Missense codons	11:5247868-5247868	missense_variant	0.02	0.487112	0.998504		0.324	0	0.972466	0.993386	0.80432	0.6353	0.676	0.738	0.746	0.94626			0.485	0.8045	4.33	3.34012	0.257483	-3.19	3.455	-4.36	22.3	6.259	1.175	0.999	0.902	9.1161	3.17444
1082	NM_000518.4:c.254C>T	HBB:c.254C>T	NM_000518.4:c.254C>T	NP_000509.1:p.(T85I)	VUS	VUS	Missense codons	11:5247868-5247868	missense_variant	0.04	0.487112	0.998477		0.425	0	0.988015	0.998822	0.813919	0.6827	0.761	0.779	0.729	0.93957			0.487	0.81	4.33	3.56865	0.287314	-3.18	2.72	-4.79	22.7	6.259	1.175	0.999	0.902	9.1161	3.43946
1083	NM_000518.4:c.257T>C	HBB:c.257T>C	NM_000518.4:c.257T>C	NP_000509.1:p.(F86S)	VUS	P/LP	Missense codons	11:5247865-5247865	missense_variant	0	0.487112	0.945084		0.993	0	0.971845	0.997484	0.672333	0.9175	0.802	0.804	0.909	0.72147			0.895	0.8883	-2.04	2.12645	0.448805	-3.18	3.9	-7.3	23.5	0.979	1.311	0.99	0.845	12.0533	3.09093
1084	NM_000518.4:c.259G>C	HBB:c.259G>C	NM_000518.4:c.259G>C	NP_000509.1:p.(A87P)	VUS	P/LP	Missense codons	11:5247863-5247863	missense_variant	0	0.487112	0.997828		0.995		0.990642	0.997412	0.766023	1.0091	0.745	0.796	0.684	0.46337			0.902	0.9035	4.3	3.12425	0.436679	-3.31	4.15	-4.16	24	-0.067	1.025	0.907	0.734	12.1114	4.07467
1086	NM_000518.4:c.260C>A	HBB:c.260C>A	NM_000518.4:c.260C>A	NP_000509.1:p.(A87D)	VUS	P/LP	Missense codons	11:5247862-5247862	missense_variant	0.02	0.487112	0.999655		0.844	0	0.972173	0.996769	0.648035	0.9583	0.708	0.777	0.904	0.95242			0.707	0.9189	5.24	5.50725	0.485132	-3.24	3.605	-4.67	24.8	7.371	1.175	0.739	0.622	17.9125	5.51512
1087	NM_000518.4:c.262_264delACA	HBB:c.262_264delACA	NM_000518.4:c.262_264delACA	NP_000509.1:p.(T88del)	VUS	P/LP	Inframe indels	11:5247857-5247860	inframe_deletion						0																			1.082
1088	NM_000518.4:c.262A>C	HBB:c.262A>C	NM_000518.4:c.262A>C	NP_000509.1:p.(T88P)	VUS	B/LB	Missense codons	11:5247860-5247860	missense_variant	0.07	0.487112	1		0.018	0	0.0663882	0.70043	0.151485	-0.4985		0.496	0.808	0.1251			0.32	0.412	-10.5	0.00406188	0.149397	-3.15	0.12	-0.48	0.002	-1.254	-0.661	0.018	0.333	4.8976	0.0039321
1089	NM_000518.4:c.263C>T	HBB:c.263C>T	NM_000518.4:c.263C>T	NP_000509.1:p.(T88I)	VUS	VUS	Missense codons	11:5247859-5247859	missense_variant	0.02	0.487112	1		0.452	0	0.11979	0.955977	0.808919	0.2817		0.605	0.851	0.15949			0.531	0.7372	-7.31	0.176321	0.233748	-3.18	1.665	-1.88	11.88	0.799	-0.144	0.005	0.341	9.454	0.229321
1090	NM_000518.4:c.263C>A	HBB:c.263C>A	NM_000518.4:c.263C>A	NP_000509.1:p.(T88K)	VUS	VUS	Missense codons	11:5247859-5247859	missense_variant	1	0.487112	1		0.003	0	0.0615531	0.635017	0.040196	-0.5951	0.356	0.544	0.866	0.01658			0	0.2343	-7.31	0.0258842	0.153917	-2.93	-1.88	2.29	0.011	0.799	-0.144	0.005	0.341	9.454	0.0147125
1091	NM_000518.4:c.265C>G	HBB:c.265C>G	NM_000518.4:c.265C>G	NP_000509.1:p.(L89V)	VUS	VUS	Missense codons	11:5247857-5247857	missense_variant	0	0.487112	1		0.992		0.992259	0.997766	0.981102	1.0884	0.944	0.907	0.93	0.97117			0.892	0.9657	5.24	8.31645	0.545171	-4.29	4.645	-2.89	24.4	7.482	1.175	0.123	0.533	17.9125	10.1654
1092	NM_000518.4:c.266T>G	HBB:c.266T>G	NM_000518.4:c.266T>G	NP_000509.1:p.(L89R)	VUS	VUS	Missense codons	11:5247856-5247856	missense_variant	0	0.487112	1		0.999	0	0.992898	0.997367	0.979002	1.0857	0.936	0.972	0.996	0.97893			0.935	0.9675	5.24	8.40666	0.560695	-4.39	4.645	-5.78	25.3	8.514	1.311	0.159	0.632	14.3909	10.5562
1093	NM_000518.4:c.266T>C	HBB:c.266T>C	NM_000518.4:c.266T>C	NP_000509.1:p.(L89P)	VUS	VUS	Missense codons	11:5247856-5247856	missense_variant	0	0.487112	1		0.987	0	0.970454	0.998539	0.854315	1.0865	0.922	0.976	0.998	0.97788			0.881	0.9671	5.24	8.35696	0.558352	-4.39	4.645	-6.74	25.4	8.514	1.311	0.159	0.632	14.3909	10.4764
1094	NM_000518.4:c.268A>C	HBB:c.268A>C	NM_000518.4:c.268A>C	NP_000509.1:p.(S90R)	VUS	P/LP	Missense codons	11:5247854-5247854	missense_variant	0	0.487112	0.999998		1	0.01	0.996454	0.997933	0.983102	1.0095	0.909	0.915	0.98	0.93191			0.945	0.9073	5.24	6.50967	0.479297	-3.28	4.61	-4.79	25.2	3.645	1.137	0.731	0.804	10.2825	7.59255
1094	NM_000518.4:c.270T>A	HBB:c.270T>A	NM_000518.4:c.270T>A	NP_000509.1:p.(S90R)	VUS	P/LP	Missense codons	11:5247852-5247852	missense_variant	0	0.487112	0.999965		1		0.989995	0.997575	0.983102	0.7314	0.909	0.817	0.98	0.50255			0.945	0.8885	1.34	2.74586	0.445824	-3.28	4.61	-4.79	23.8	-0.059	1.311	0.968	0.914	5.3252	3.73016
1094	NM_000518.4:c.270T>G	HBB:c.270T>G	NM_000518.4:c.270T>G	NP_000509.1:p.(S90R)	VUS	P/LP	Missense codons	11:5247852-5247852	missense_variant	0	0.487112	0.999966		1	0	0.989995	0.997492	0.983102	0.7314	0.909	0.817	0.98	0.50461			0.945	0.8885	1.34	2.74586	0.445824	-3.28	4.61	-4.79	23.9	-0.059	1.311	0.968	0.914	5.3252	3.73016
1095	NM_000518.4:c.269G>A	HBB:c.269G>A	NM_000518.4:c.269G>A	NP_000509.1:p.(S90N)	VUS	P/LP	Missense codons	11:5247853-5247853	missense_variant	0	0.487112	0.999993		0.93	0	0.992306	0.996889	0.907609	1.0509	0.916	0.804	0.829	0.93211			0.821	0.9254	5.24	8.68518	0.229991	-3.3	4.61	-2.86	25.3	3.527	1.025	0.902	0.871	14.3675	10.0524
1096	NM_000518.4:c.269G>C	HBB:c.269G>C	NM_000518.4:c.269G>C	NP_000509.1:p.(S90T)	VUS	P/LP	Missense codons	11:5247853-5247853	missense_variant	0	0.487112	0.999991		0.995		0.988713	0.995837	0.969703	1.038	0.896	0.872	0.927	0.91054			0.902	0.9215	5.24	8.42613	0.477551	-3.28	4.265	-2.87	25.2	3.527	1.025	0.902	0.871	14.3675	9.59908
1097	NM_000518.4:c.271G>A	HBB:c.271G>A	NM_000518.4:c.271G>A	NP_000509.1:p.(E91K)	VUS	VUS	Missense codons	11:5247851-5247851	missense_variant	0.21	0.487112	0.99801		0.383	0	0.975695	0.999202	0.954605	0.3829	0.866	0.647	0.868	0.63463			0.166	0.6928	5.24	3.02857	0.41911	-3.11	2.87	-3.43	23.3	0.993	1.025	0.987	0.938	11.354	2.93702
1098	NM_000518.4:c.272A>G	HBB:c.272A>G	NM_000518.4:c.272A>G	NP_000509.1:p.(E91G)	VUS	VUS	Missense codons	11:5247850-5247850	missense_variant	0.02	0.487112	0.99835		0.96	0	0.983175	0.999235	0.970703	1.0033	0.815	0.856	0.641	0.87658			0.786	0.8955	5.24	6.00681	0.432504	-3.26	3.995	-6.28	27.3	1.853	1.137	0.994	0.953	14.3909	6.50011
1099	NM_000518.4:c.273G>C	HBB:c.273G>C	NM_000518.4:c.273G>C	NP_000509.1:p.(E91D)	VUS	P/LP	Missense codons	11:5247849-5247849	missense_variant	0.07	0.487112	0.982355		0.17		0.950687	0.998496	0.90141	0.0987	0.896	0.673	0.849	0.89757			0.335	0.6716	2.29	1.98291	0.386769	-3.13	2.565	-2.76	19.66	0.764	1.025	0.996	0.961	8.6338	1.84237
1099	NM_000518.4:c.273G>T	HBB:c.273G>T	NM_000518.4:c.273G>T	NP_000509.1:p.(E91D)	VUS	P/LP	Missense codons	11:5247849-5247849	missense_variant	0.07	0.487112	0.981741		0.17	0	0.959266	0.998506	0.90141	0.0987	0.896	0.673	0.849	0.88132			0.335	0.6716	2.29	1.98291	0.386748	-3.13	2.565	-2.76	19.75	0.764	1.025	0.996	0.961	8.6338	1.84237
1100	NM_000518.4:c.280_294delTGTGACAAGCTGCAC	HBB:c.280_294delTGTGACAAGCTGCAC	NM_000518.4:c.280_294delTGTGACAAGCTGCAC	NP_000509.1:p.(C94_H98del)	VUS	P/LP	Inframe indels	11:5247827-5247842	inframe_deletion																									21
1101	NM_000518.4:c.275T>C	HBB:c.275T>C	NM_000518.4:c.275T>C	NP_000509.1:p.(L92P)	VUS	VUS	Missense codons	11:5247847-5247847	missense_variant	0	0.487112	1		0.992	0	0.990546	0.998965	0.873613	1.0297	0.858	0.917	0.966	0.94218			0.892	0.9185	5.24	10.1151	0.48742	-3.22	4.505	-6.33	27.4	5.576	1.311	0.996	0.968	9.7417	11.0335
1102	NM_000518.4:c.275T>G	HBB:c.275T>G	NM_000518.4:c.275T>G	NP_000509.1:p.(L92R)	VUS	VUS	Missense codons	11:5247847-5247847	missense_variant	0	0.487112	0.999833		0.598	0	0.992671	0.997691	0.869413	0.8037	0.871	0.885	0.958	0.94463			0.651	0.8222	5.24	7.19946	0.461727	-3	3.955	-5.37	26.3	5.576	1.311	0.996	0.968	9.7417	7.19059
1103	NM_000518.4:c.277C>G	HBB:c.277C>G	NM_000518.4:c.277C>G	NP_000509.1:p.(H93D)	P/LP	VUS	Missense codons	11:5247845-5247845	missense_variant	0	0.487112	1		1		0.999396	0.994918	0.973803	0.9876	0.959	0.979	0.92	0.97208			0.945	0.9901	5.24	15.6138	0.556074	-5.9	4.65	-8.48	27.5	7.509	1.175	0.996	0.97	17.9125	15.3477
1104	NM_000518.4:c.277C>T	HBB:c.277C>T	NM_000518.4:c.277C>T	NP_000509.1:p.(H93Y)	VUS	P/LP	Missense codons	11:5247845-5247845	missense_variant	0.01	0.487112	1		1	0	0.998887	0.998141	0.984402	0.9876	0.947	0.977	0.953	0.96266			0.905	0.9901	5.24	15.6138	0.555717	-5.86	4.65	-5.65	27.2	7.509	1.175	0.996	0.97	17.9125	15.3477
1105	NM_000518.4:c.277C>A	HBB:c.277C>A	NM_000518.4:c.277C>A	NP_000509.1:p.(H93N)	VUS	VUS	Missense codons	11:5247845-5247845	missense_variant	0	0.487112	1		1	0	0.99894	0.991579	0.976502	1.0082	0.964	0.935	0.962	0.97102			0.945	0.9888	5.24	14.4903	0.384968	-5.9	4.65	-6.6	27.1	7.509	1.175	0.996	0.97	17.9125	14.1124
1106	NM_000518.4:c.278A>C	HBB:c.278A>C	NM_000518.4:c.278A>C	NP_000509.1:p.(H93P)	VUS	VUS	Missense codons	11:5247844-5247844	missense_variant	0.01	0.487112	1		1	0	0.999792	0.988128	0.859714	0.9873	0.953	0.963	0.966	0.96188			0.905	0.9893	5.24	10.8831	0.543392	-5.9	4.65	-9.42	26.6	5.755	1.137	0.998	0.972	14.3909	11.9172
1107	NM_000518.4:c.278A>G	HBB:c.278A>G	NM_000518.4:c.278A>G	NP_000509.1:p.(H93R)	VUS	P/LP	Missense codons	11:5247844-5247844	missense_variant	0.01	0.487112	1		1	0	0.999051	0.997806	0.881012	0.9873	0.959	0.972	0.901	0.94915			0.905	0.9893	5.24	10.8831	0.543383	-5.9	4.305	-7.54	25.6	5.755	1.137	0.998	0.972	14.3909	11.9172
1109	NM_000518.4:c.279C>A	HBB:c.279C>A	NM_000518.4:c.279C>A	NP_000509.1:p.(H93Q)	VUS	P/LP	Missense codons	11:5247843-5247843	missense_variant	0	0.487112	1		1	0	0.999	0.992873	0.968903	1.0538	0.963	0.961	0.95	0.93277			0.945	0.9862	3.38	4.46965	0.520294	-5.9	4.65	-7.54	23.8	2.558	0.227	0.999	0.97	10.8925	5.31455
1109	NM_000518.4:c.279C>G	HBB:c.279C>G	NM_000518.4:c.279C>G	NP_000509.1:p.(H93Q)	VUS	P/LP	Missense codons	11:5247843-5247843	missense_variant	0	0.487112	1		1		0.999	0.993163	0.968903	1.0538	0.963	0.961	0.95	0.93584			0.945	0.9862	3.38	4.46965	0.520295	-5.9	4.65	-7.54	23.7	2.558	0.227	0.999	0.97	10.8925	5.31455
1111	NM_000518.4:c.280T>C	HBB:c.280T>C	NM_000518.4:c.280T>C	NP_000509.1:p.(C94R)	VUS	P/LP	Missense codons	11:5247842-5247842	missense_variant	0	0.487112	1		0.962	0	0.999509	0.997181	0.615039	0.8544	0.912	0.879	0.768	0.9404			0.85	0.8492	5.24	7.61428	0.466773	-3.06	3.645	-10.37	26.8	4.381	1.311	1	0.973	10.5287	7.65958
1112	NM_000518.4:c.281G>A	HBB:c.281G>A	NM_000518.4:c.281G>A	NP_000509.1:p.(C94Y)	VUS	VUS	Missense codons	11:5247841-5247841	missense_variant	0	0.487112	0.994172		0.999	0	0.999659	0.997564	0.90031	0.8804	0.892	0.753	0.801	0.8543			0.935	0.8622	5.24	7.34093	0.404857	-3.1	3.44	-9.51	26.6	2.655	1.025	1	0.973	13.6209	7.47022
1114	NM_000518.4:c.283G>T	HBB:c.283G>T	NM_000518.4:c.283G>T	NP_000509.1:p.(D95Y)	VUS	P/LP	Missense codons	11:5247839-5247839	missense_variant	0	0.487112	0.999928		0.974	0	0.998138	0.995368	0.971203	0.8133	0.864	0.793	0.889	0.88088			0.861	0.8457	5.24	6.25061	0.425798	-3.18	2.285	-7.67	28	1.305	1.025	1	0.966	13.6209	6.08517
1115	NM_000518.4:c.283G>C	HBB:c.283G>C	NM_000518.4:c.283G>C	NP_000509.1:p.(D95H)	VUS	P/LP	Missense codons	11:5247839-5247839	missense_variant	0	0.487112	0.999858		0.978		0.99481	0.995468	0.792821	0.8133	0.863	0.824	0.902	0.8647			0.865	0.8457	5.24	6.26118	0.436266	-3.19	2.735	-5.76	27.2	1.305	1.025	1	0.966	13.6209	6.09775
1116	NM_000518.4:c.283G>A	HBB:c.283G>A	NM_000518.4:c.283G>A	NP_000509.1:p.(D95N)	VUS	P/LP	Missense codons	11:5247839-5247839	missense_variant	0.11	0.487112	0.999219		0.276	0	0.970944	0.999292	0.858114	0.4833	0.863	0.588	0.542	0.8819			0.301	0.7664	5.24	3.78935	0.0924552	-3.13	2.34	-3.86	23.3	1.305	1.025	1	0.966	13.6209	3.33178
1117	NM_000518.4:c.284A>G	HBB:c.284A>G	NM_000518.4:c.284A>G	NP_000509.1:p.(D95G)	VUS	VUS	Missense codons	11:5247838-5247838	missense_variant	0.03	0.487112	0.999902		0.46	0	0.99304	0.99864	0.916508	0.7619	0.856	0.89	0.777	0.95329			0.515	0.8266	5.24	4.57628	0.456427	-3.13	3.585	-5.82	26.5	4.457	1.137	1	0.958	14.3909	4.09524
1118	NM_000518.4:c.271_285dupGAGCTGCACTGTGAC	HBB:c.271_285dupGAGCTGCACTGTGAC	NM_000518.4:c.271_285dupGAGCTGCACTGTGAC	NP_000509.1:p.(E91_D95dup)	VUS	P/LP	Inframe indels	11:5247850-5247850	stop_gained,protein_altering_variant
1119	NM_000518.4:c.286A>G	HBB:c.286A>G	NM_000518.4:c.286A>G	NP_000509.1:p.(K96E)	VUS	VUS	Missense codons	11:5247836-5247836	missense_variant	0.04	0.487112	1		0.22	0	0.290454	0.998244	0.852015	0.3287	0.738	0.772	0.644	0.91322			0.37	0.7222	5.24	3.33974	0.249432	-3.13	2.645	-3.11	23.8	2.405	1.137	1	0.917	8.9478	2.90491
1120	NM_000518.4:c.287A>T	HBB:c.287A>T	NM_000518.4:c.287A>T	NP_000509.1:p.(K96M)	VUS	P/LP	Missense codons	11:5247835-5247835	missense_variant	0	0.487112	1		0.978		0.991462	0.996183	0.858914	1.0356	0.724	0.927	0.633	0.94684			0.865	0.9089	5.24	7.39094	0.462031	-3.23	3.575	-5.19	27.9	4.473	1.137	0.997	0.871	14.3909	7.8581
1121	NM_000518.4:c.288G>C	HBB:c.288G>C	NM_000518.4:c.288G>C	NP_000509.1:p.(K96N)	VUS	VUS	Missense codons	11:5247834-5247834	missense_variant	0	0.487112	1		0.965		0.991143	0.998019	0.839416	0.782	0.679	0.777	0.654	0.866			0.851	0.8579	2.4	3.04656	0.146637	-3.2	2.995	-4.21	23.7	0.607	0.13	0.992	0.79	8.0414	3.53104
1121	NM_000518.4:c.288G>T	HBB:c.288G>T	NM_000518.4:c.288G>T	NP_000509.1:p.(K96N)	VUS	VUS	Missense codons	11:5247834-5247834	missense_variant	0	0.487112	1		0.965	0	0.991916	0.998255	0.839416	0.782	0.679	0.776	0.654	0.83827			0.851	0.8579	2.4	3.04656	0.146629	-3.2	2.995	-4.21	23.8	0.607	0.13	0.992	0.79	8.0414	3.53104
1122	NM_000518.4:c.289C>G	HBB:c.289C>G	NM_000518.4:c.289C>G	NP_000509.1:p.(L97V)	VUS	P/LP	Missense codons	11:5247833-5247833	missense_variant	0	0.487112	0.999826		0.992		0.990996	0.993336	0.979302	0.925	0.786	0.885	0.852	0.94844			0.892	0.9073	2.39	3.09173	0.458272	-3.29	4.6	-2.76	22.7	4.324	-0.652	0.988	0.754	9.8518	3.78919
1123	NM_000518.4:c.290T>C	HBB:c.290T>C	NM_000518.4:c.290T>C	NP_000509.1:p.(L97P)	VUS	P/LP	Missense codons	11:5247832-5247832	missense_variant	0	0.487112	1		1	0	0.997117	0.998999	0.967303	1.084	0.818	0.977	0.97	0.97817			0.945	0.9308	5.24	12.1363	0.515825	-3.3	4.6	-6.44	27.2	8.502	1.311	0.995	0.776	14.3909	12.9768
1124	NM_000518.4:c.274_288dup	HBB:c.274_288dup	NM_000518.4:c.274_288dup	NM_000518.4:c.280_294dup	VUS	P/LP	Inframe indels	11:5247847-5247847	stop_gained,protein_altering_variant
1125	NM_000518.4:c.293_295delACG	HBB:c.293_295delACG	NM_000518.4:c.293_295delACG	NP_000509.1:p.(H98_V99delinsL)	VUS	P/LP	Inframe indels	11:5247826-5247829	inframe_deletion						0																			21
1126	NM_000518.4:c.292C>T	HBB:c.292C>T	NM_000518.4:c.292C>T	NP_000509.1:p.(H98Y)	VUS	P/LP	Missense codons	11:5247830-5247830	missense_variant	0	0.487112	0.999996		0.756	0	0.990357	0.998019	0.884712	1.0216		0.899	0.891	0.92351			0.724	0.9075	5.24	7.53988	0.484929	-3.36	3.695	-5.51	25.1	4.768	1.175	0.998	0.791	17.9125	7.86967
1127	NM_000518.4:c.292C>A	HBB:c.292C>A	NM_000518.4:c.292C>A	NP_000509.1:p.(H98N)	VUS	VUS	Missense codons	11:5247830-5247830	missense_variant	0.03	0.487112	0.999996		0.991	0.02	0.989796	0.990242	0.910609	0.964	0.891	0.783	0.818	0.91045			0.808	0.8934	5.24	7.66858	0.211692	-3.27	3.205	-6.43	25.3	4.768	1.175	0.998	0.791	17.9125	7.89141
1128	NM_000518.4:c.293A>T	HBB:c.293A>T	NM_000518.4:c.293A>T	NP_000509.1:p.(H98L)	VUS	P/LP	Missense codons	11:5247829-5247829	missense_variant	0	0.487112	1		0.637		0.999131	0.977716	0.825517	0.8996	0.869	0.9	0.782	0.95856			0.667	0.8573	5.24	5.62042	0.458483	-3.35	3.275	-10.1	25.5	4.506	1.137	0.997	0.789	14.3909	5.45031
1129	NM_000518.4:c.293A>C	HBB:c.293A>C	NM_000518.4:c.293A>C	NP_000509.1:p.(H98P)	VUS	P/LP	Missense codons	11:5247829-5247829	missense_variant	0	0.487112	1		0.996	0	0.999275	0.986629	0.811819	1.0544	0.886	0.936	0.918	0.95994			0.906	0.9159	5.24	8.53402	0.49034	-3.35	4.245	-9.18	25.6	4.506	1.137	0.997	0.789	14.3909	9.4129
1130	NM_000518.4:c.294C>A	HBB:c.294C>A	NM_000518.4:c.294C>A	NP_000509.1:p.(H98Q)	VUS	P/LP	Missense codons	11:5247828-5247828	missense_variant	0.02	0.487112	0.999942		0.936	0	0.993931	0.989881	0.811219	0.7508	0.888	0.873	0.957	0.8193			0.764	0.8581	0.154	2.03698	0.423258	-3.33	3.35	-7.34	21.7	0.023	-0.484	0.993	0.78	11.064	2.53731
1130	NM_000518.4:c.294C>G	HBB:c.294C>G	NM_000518.4:c.294C>G	NP_000509.1:p.(H98Q)	VUS	P/LP	Missense codons	11:5247828-5247828	missense_variant	0.02	0.487112	0.999938		0.936		0.993931	0.989914	0.811219	0.7508	0.888	0.872	0.957	0.8627			0.764	0.8581	0.154	2.03698	0.423213	-3.33	3.35	-7.34	21.7	0.023	-0.484	0.993	0.78	11.064	2.53731
1131	NM_000518.4:c.295G>A	HBB:c.295G>A	NM_000518.4:c.295G>A	NP_000509.1:p.(V99M)	VUS	P/LP	Missense codons	11:5247827-5247827	missense_variant	0.01	0.487112	1		0.964	0	0.985429	0.998976	0.934007	1.0844	0.94	0.904	0.972	0.96998			0.812	0.9485	5.24	11.1858	0.541822	-4.18	3.89	-2.62	26.7	7.199	1.025	0.997	0.799	17.9125	11.3153
1132	NM_000518.4:c.296T>G	HBB:c.296T>G	NM_000518.4:c.296T>G	NP_000509.1:p.(V99G)	VUS	P/LP	Missense codons	11:5247826-5247826	missense_variant	0.02	0.487112	1		0.946	0	0.994774	0.996663	0.760024	1.0904	0.916	0.968	0.671	0.97976			0.773	0.9439	5.24	10.2608	0.553968	-4.2	4.24	-6.35	27.8	8.684	1.311	1	0.81	14.3909	10.5595
1133	NM_000518.4:c.296T>A	HBB:c.296T>A	NM_000518.4:c.296T>A	NP_000509.1:p.(V99E)	VUS	VUS	Missense codons	11:5247826-5247826	missense_variant	0	0.487112	1		0.962		0.995977	0.989952	0.863614	1.0961	0.899	0.977	0.986	0.97942			0.85	0.949	5.24	10.5887	0.553888	-4.2	4.585	-5.43	28.2	8.684	1.311	1	0.81	14.3909	10.9731
1134	NM_000518.4:c.296T>C	HBB:c.296T>C	NM_000518.4:c.296T>C	NP_000509.1:p.(V99A)	VUS	P/LP	Missense codons	11:5247826-5247826	missense_variant	0.01	0.487112	1		0.952	0	0.991361	0.998905	0.819918	1.0964	0.922	0.961	0.986	0.97865			0.801	0.9571	5.24	11.4289	0.549077	-4.1	4.585	-3.6	26.8	8.684	1.311	1	0.81	14.3909	12.0815
1135	NM_000518.4:c.298G>T	HBB:c.298G>T	NM_000518.4:c.298G>T	NP_000509.1:p.(D100Y)	VUS	P/LP	Missense codons	11:5247824-5247824	missense_variant	0	0.487112	1		1	0	0.999176	0.994859	0.987101	1.0865	0.932	0.954	0.991	0.97369			0.945	0.9464	5.24	13.6207	0.512414	-3.62	4.615	-7.89	31	7.352	1.025	1	0.812	17.9125	14.0814
1136	NM_000518.4:c.298G>C	HBB:c.298G>C	NM_000518.4:c.298G>C	NP_000509.1:p.(D100H)	VUS	P/LP	Missense codons	11:5247824-5247824	missense_variant	0	0.487112	1		1		0.998765	0.995122	0.985868	1.0865	0.933	0.958	0.986	0.97449			0.945	0.9464	5.24	13.6207	0.524237	-3.6	4.615	-6.09	29.1	7.352	1.025	1	0.812	17.9125	14.0814
1137	NM_000518.4:c.298G>A	HBB:c.298G>A	NM_000518.4:c.298G>A	NP_000509.1:p.(D100N)	VUS	P/LP	Missense codons	11:5247824-5247824	missense_variant	0.01	0.487112	1		0.97	0	0.994658	0.998636	0.927007	1.0817	0.924	0.838	0.943	0.97054			0.818	0.9457	5.24	13.0558	0.187921	-3.53	3.92	-4.25	29.7	7.352	1.025	1	0.812	17.9125	13.4935
1138	NM_000518.4:c.299A>G	HBB:c.299A>G	NM_000518.4:c.299A>G	NP_000509.1:p.(D100G)	VUS	P/LP	Missense codons	11:5247823-5247823	missense_variant	0	0.487112	1		0.999	0	0.998788	0.998567	0.939106	1.0752	0.941	0.974	0.993	0.96939			0.935	0.9293	5.24	9.90277	0.516304	-3.53	4.27	-6.12	29.6	7.455	1.137	1	0.805	14.3909	10.6181
1139	NM_000518.4:c.299A>C	HBB:c.299A>C	NM_000518.4:c.299A>C	NP_000509.1:p.(D100A)	VUS	P/LP	Missense codons	11:5247823-5247823	missense_variant	0	0.487112	1		1	0	0.995433	0.996199	0.970003	1.0628	0.934	0.976	0.972	0.9726			0.945	0.9236	5.24	9.42838	0.510786	-3.57	3.925	-7.02	28.4	7.455	1.137	1	0.805	14.3909	9.97381
1140	NM_000518.4:c.299A>T	HBB:c.299A>T	NM_000518.4:c.299A>T	NP_000509.1:p.(D100V)	VUS	P/LP	Missense codons	11:5247823-5247823	missense_variant	0	0.487112	1		1		0.999524	0.993569	0.988984	1.0934	0.93	0.972	0.978	0.97189			0.945	0.942	5.24	11.0791	0.525797	-3.61	4.615	-7.91	28.6	7.455	1.137	1	0.805	14.3909	12.1909
1141	NM_000518.4:c.300T>A	HBB:c.300T>A	NM_000518.4:c.300T>A	NP_000509.1:p.(D100E)	VUS	P/LP	Missense codons	11:5247822-5247822	missense_variant	0.02	0.487112	0.99975		0.888		0.981806	0.994104	0.862114	0.9319	0.928	0.891	0.936	0.817			0.73	0.909	-0.861	2.19643	0.452822	-3.51	4.27	-3.5	22.9	0.247	0.319	1	0.79	9.9785	2.81836
1141	NM_000518.4:c.300T>G	HBB:c.300T>G	NM_000518.4:c.300T>G	NP_000509.1:p.(D100E)	VUS	P/LP	Missense codons	11:5247822-5247822	missense_variant	0.02	0.487112	0.999758		0.888	0	0.981806	0.993738	0.862114	0.9319	0.928	0.891	0.936	0.82737			0.73	0.909	-0.861	2.19643	0.452825	-3.51	4.27	-3.5	22.9	0.247	0.319	1	0.79	9.9785	2.81836
1142	NM_000518.4:c.301C>G	HBB:c.301C>G	NM_000518.4:c.301C>G	NP_000509.1:p.(P101A)	VUS	P/LP	Missense codons	11:5247821-5247821	missense_variant	0	0.487112	1		0.997		0.994916	0.994892	0.981102	1.0418	0.951	0.949	0.967	0.98056			0.911	0.9219	5.24	13.887	0.499322	-3.32	4.27	-6.64	25.7	9.318	1.175	1	0.784	17.9125	13.5366
1143	NM_000518.4:c.302C>G	HBB:c.302C>G	NM_000518.4:c.302C>G	NP_000509.1:p.(P101R)	VUS	P/LP	Missense codons	11:5247820-5247820	missense_variant	0	0.487112	1		1		0.999522	0.998415	0.978502	1.0865	0.955	0.966	0.979	0.98056			0.945	0.9464	5.24	15.6175	0.525843	-3.44	4.62	-7.56	27.1	9.318	1.175	0.998	0.771	17.9125	15.4897
1144	NM_000518.4:c.302C>T	HBB:c.302C>T	NM_000518.4:c.302C>T	NP_000509.1:p.(P101L)	VUS	P/LP	Missense codons	11:5247820-5247820	missense_variant	0.01	0.487112	1		1	0	0.998958	0.9988	0.935706	1.0478	0.948	0.942	0.93	0.97753			0.905	0.9264	5.24	12.9076	0.52696	-3.46	3.72	-8.44	29	9.318	1.175	0.998	0.771	17.9125	12.4701
1145	NM_000518.4:c.304G>C	HBB:c.304G>C	NM_000518.4:c.304G>C	NP_000509.1:p.(E102Q)	VUS	VUS	Missense codons	11:5247818-5247818	missense_variant	0.05	0.487112	0.998564		0.732		0.898898	0.995428	0.875013	0.8447	0.803	0.869	0.868	0.96888			0.613	0.8422	4.32	4.13561	0.42108	-3.28	2.195	-1.99	24.1	7.352	0.121	0.996	0.735	15.0956	4.22147
1146	NM_000518.4:c.304G>A	HBB:c.304G>A	NM_000518.4:c.304G>A	NP_000509.1:p.(E102K)	VUS	P/LP	Missense codons	11:5247818-5247818	missense_variant	0.02	0.487112	0.999678		0.979	0	0.98902	0.998782	0.931007	0.9554	0.84	0.916	0.905	0.96563			0.805	0.8751	4.32	4.86464	0.459377	-3.22	3.14	-2.92	25.7	7.352	0.121	0.996	0.735	15.0956	5.20005
1147	NM_000518.4:c.305A>G	HBB:c.305A>G	NM_000518.4:c.305A>G	NP_000509.1:p.(E102G)	VUS	P/LP	Missense codons	11:5247817-5247817	missense_variant	0.02	0.487112	0.999846		0.779	0	0.990791	0.997821	0.756224	0.8483	0.78	0.923	0.68	0.94486			0.674	0.8385	5.24	4.96568	0.425021	-3.3	2.555	-5.3	27.7	3.68	1.137	0.998	0.735	14.3909	4.81973
1148	NM_000518.4:c.305A>C	HBB:c.305A>C	NM_000518.4:c.305A>C	NP_000509.1:p.(E102A)	VUS	VUS	Missense codons	11:5247817-5247817	missense_variant	0.02	0.487112	0.999815		0.789	0	0.992262	0.99722	0.90021	0.7524	0.759	0.899	0.561	0.93854			0.679	0.8028	5.24	4.61952	0.247702	-3.11	1.825	-4.31	26.3	3.68	1.137	0.998	0.735	14.3909	4.39005
1149	NM_000518.4:c.306G>C	HBB:c.306G>C	NM_000518.4:c.306G>C	NP_000509.1:p.(E102D)	VUS	P/LP	Missense codons	11:5247816-5247816	missense_variant	0.41	0.487112	0.968859		0.364		0.607496	0.998572	0.893711	0.5499	0.785	0.701	0.587	0.72793			0.131	0.793	5.24	3.29598	0.382104	-3.21	1.92	-2.19	21.3	0.778	1.025	0.998	0.728	11.354	2.97596
1149	NM_000518.4:c.306G>T	HBB:c.306G>T	NM_000518.4:c.306G>T	NP_000509.1:p.(E102D)	VUS	P/LP	Missense codons	11:5247816-5247816	missense_variant	0.41	0.487112	0.968859		0.364	0	0.607496	0.998639	0.893711	0.5499	0.785	0.701	0.587	0.76717			0.131	0.793	5.24	3.29598	0.382111	-3.21	1.92	-2.19	21.7	0.778	1.025	0.998	0.728	11.354	2.97596
1150	NM_000518.4:c.307A>T	HBB:c.307A>T	NM_000518.4:c.307A>T	NP_000509.1:p.(N103Y)	VUS	VUS	Missense codons	11:5247815-5247815	missense_variant	0.02	0.487112	1		0.976		0.996392	0.993782	0.858514	1.066	0.922	0.943	0.974	0.97189			0.801	0.9204	5.24	9.40878	0.488123	-3.23	4.3	-6.73	26.6	7.455	1.137	0.996	0.714	14.3909	10.5454
1151	NM_000518.4:c.307A>C	HBB:c.307A>C	NM_000518.4:c.307A>C	NP_000509.1:p.(N103H)	VUS	VUS	Missense codons	11:5247815-5247815	missense_variant	0	0.487112	1		0.999	0	0.997775	0.995949	0.973803	1.0688	0.916	0.911	0.936	0.9726			0.935	0.9222	5.24	9.51475	0.271947	-3.24	4.645	-4.22	25.6	7.455	1.137	0.996	0.714	14.3909	10.6852
1152	NM_000518.4:c.308A>G	HBB:c.308A>G	NM_000518.4:c.308A>G	NP_000509.1:p.(N103S)	VUS	VUS	Missense codons	11:5247814-5247814	missense_variant	0.02	0.487112	1		0.91	0	0.973894	0.998742	0.914109	1.022	0.932	0.828	0.656	0.94163			0.746	0.9016	5.24	6.75887	0.175408	-3.29	4.645	-4.27	24.6	5.755	1.137	0.992	0.687	14.3909	7.53854
1153	NM_000518.4:c.308A>C	HBB:c.308A>C	NM_000518.4:c.308A>C	NP_000509.1:p.(N103T)	VUS	VUS	Missense codons	11:5247814-5247814	missense_variant	0	0.487112	1		0.997	0	0.994664	0.99544	0.90141	1.0688	0.931	0.892	0.917	0.95735			0.911	0.9222	5.24	7.4968	0.251719	-3.32	4.645	-5.14	25.3	5.755	1.137	0.992	0.687	14.3909	8.75504
1154	NM_000518.4:c.309C>A	HBB:c.309C>A	NM_000518.4:c.309C>A	NP_000509.1:p.(N103K)	VUS	P/LP	Missense codons	11:5247813-5247813	missense_variant	0	0.487112	0.999993		0.992	0	0.991749	0.987725	0.967303	0.9043	0.922	0.812	0.952	0.92533			0.892	0.9136	-0.00799	2.40851	0.17907	-3.29	4.645	-5.14	22.5	2.618	-0.57	0.976	0.636	10.0206	3.3003
1154	NM_000518.4:c.309C>G	HBB:c.309C>G	NM_000518.4:c.309C>G	NP_000509.1:p.(N103K)	VUS	P/LP	Missense codons	11:5247813-5247813	missense_variant	0	0.487112	0.999993		0.992		0.989023	0.987197	0.967303	0.9043	0.922	0.81	0.952	0.92864			0.892	0.9136	-0.00799	2.40851	0.179071	-3.29	4.645	-5.14	22.4	2.618	-0.57	0.976	0.636	10.0206	3.3003
1155	NM_000518.4:c.310T>G	HBB:c.310T>G	NM_000518.4:c.310T>G	NP_000509.1:p.(F104V)	VUS	P/LP	Missense codons	11:5247812-5247812	missense_variant	0	0.487112	1		1	0	0.997126	0.989749	0.980302	1.0796	0.935	0.984	0.961	0.97976			0.945	0.9718	5.24	10.5042	0.563078	-4.68	4.645	-6.22	25.9	8.684	1.311	0.979	0.636	14.3909	12.1134
1156	NM_000518.4:c.310T>A	HBB:c.310T>A	NM_000518.4:c.310T>A	NP_000509.1:p.(F104I)	VUS	P/LP	Missense codons	11:5247812-5247812	missense_variant	0	0.487112	1		1		0.997185	0.992323	0.980002	1.094	0.94	0.986	0.958	0.97942			0.945	0.9668	5.24	9.42086	0.562797	-4.68	4.645	-5.33	26.2	8.684	1.311	0.979	0.636	14.3909	10.5576
1157	NM_000518.4:c.312C>G	HBB:c.312C>G	NM_000518.4:c.312C>G	NP_000509.1:p.(F104L)	VUS	P/LP	Missense codons	11:5247810-5247810	missense_variant	0.01	0.487112	1		1		0.996514	0.998632	0.922708	1.0917	0.915	0.96	0.979	0.95917			0.905	0.9665	4.33	6.32449	0.53872	-4.6	3.955	-5.33	25.1	5.321	1.175	0.965	0.604	13.0618	7.77424
1158	NM_000518.4:c.313A>T	HBB:c.313A>T	NM_000518.4:c.313A>T	NP_000509.1:p.(R105W)	VUS	VUS	Splice region variant; Missense codons	11:5247809-5247809	missense_variant,splice_region_variant	0	0.487112	0.999973		0.994		0.983371	0.998729	0.975702	0.9658	0.71	0.903	0.69	0.93429	0.0742102	0.264	0.897	0.897	4.08	4.34778	0.453126	-3.22	3.875	-5.4	26.9	2.4	1.137	0.924	0.564	11.4427	5.18804	0.522	5.64141
1159	NM_000518.4:c.314G>C	HBB:c.314G>C	NM_000518.4:c.314G>C	NP_000509.1:p.(R105T)	VUS	VUS	Splice region variant; Missense codons	11:5247808-5247808	missense_variant,splice_region_variant	0.01	0.487112	0.991154		0.476		0.378449	0.934883	0.726827	0.2961	0.726	0.713	0.864	0.8092	0.000134295	0.108	0.562	0.807	-2.27	0.620237	0.355998	-3.15	2.98	-3.82	16	-0.21	-2.17	0.79	0.492	8.6951	0.529699	-2.201	-23.7869
1161	NM_000518.4:c.314G>A	HBB:c.314G>A	NM_000518.4:c.314G>A	NP_000509.1:p.(R105K)	VUS	VUS	Splice region variant; Missense codons	11:5247808-5247808	missense_variant,splice_region_variant	0.5	0.487112	0.942913		0.042	0	0.0276844	0.716951	0.455554	-0.7465	0.557	0.502	0.534	0.50753	2.13478e-05	0.012	0.013	0.4395	-2.27	0.259575	0.0359317	-2.98	0.175	-0.42	5.79	-0.21	-2.17	0.79	0.492	8.6951	0.13073	-1.221	-13.1957
1162	NM_000518.4:c.315G>C	HBB:c.315G>C	NM_000518.4:c.315G>C	NP_000509.1:p.(R105S)	VUS	VUS	Splice region variant; Missense codons	11:5247807-5247807	missense_variant,splice_region_variant	0.01	0.487112	0.999862		0.913		0.963117	0.99427	0.818018	1.0058	0.732	0.848	0.678	0.93565	0.998599	0.904	0.77	0.9064	3.76	3.41002	0.402085	-3.16	3.53	-3.51	28.7	3.588	0.12	0.834	0.509	12.4076	3.70306	1.052	11.3693
1162	NM_000518.4:c.315G>T	HBB:c.315G>T	NM_000518.4:c.315G>T	NP_000509.1:p.(R105S)	VUS	VUS	Splice region variant; Missense codons	11:5247807-5247807	missense_variant,splice_region_variant	0.01	0.487112	0.999856		0.913	0	0.985384	0.994908	0.818018	1.0058	0.732	0.844	0.678	0.91973	0.998131	0.95	0.77	0.9064	3.76	3.41002	0.446355	-3.16	3.53	-3.51	31	3.588	0.12	0.834	0.509	12.4076	3.70306	2.296	24.8136
1163	NM_000518.4:c.316C>T	HBB:c.316C>T	NM_000518.4:c.316C>T	NP_000509.1:p.(L106F)	P/LP	P/LP	Splice region variant; Missense codons	11:5246956-5246956	missense_variant,splice_region_variant	0	0.487112	0.99997		0.905	0	0.982719	0.998573	0.965303	0.8542	0.84	0.898	0.541	0.94862	0.12139	0.434	0.804	0.8772	2.67	5.1751	0.375358	-3.51	3.1	-3.13	27.2	4.633	1.175	0.995	0.969	7.4948	5.79278	0.322	2.81813
1166	NM_000518.4:c.320T>C	HBB:c.320T>C	NM_000518.4:c.320T>C	NP_000509.1:p.(L107P)	VUS	P/LP	Missense codons	11:5246952-5246952	missense_variant	0	0.487112	1		0.69	0	0.990101	0.998981	0.779722	1.0612	0.907	0.969	0.989	0.98525			0.692	0.9285	4.68	8.25533	0.532231	-3.99	4.22	-5.66	28.6	8.381	1.311	1	0.988	12.399	8.72103
1167	NM_000518.4:c.320T>A	HBB:c.320T>A	NM_000518.4:c.320T>A	NP_000509.1:p.(L107Q)	VUS	P/LP	Missense codons	11:5246952-5246952	missense_variant	0	0.487112	1		0.985		0.993262	0.994542	0.975102	1.0904	0.826	0.981	0.988	0.98629			0.877	0.9526	4.68	10.2413	0.548184	-3.99	4.565	-4.8	29	8.381	1.311	1	0.988	12.399	11.3588
1168	NM_000518.4:c.322G>C	HBB:c.322G>C	NM_000518.4:c.322G>C	NP_000509.1:p.(G108R)	VUS	VUS	Missense codons	11:5246950-5246950	missense_variant	0	0.487112	0.987143		0.996		0.992553	0.999176	0.942806	0.9844	0.894	0.838	0.781	0.94952			0.906	0.8846	4.68	7.07009	0.366161	-3.12	3.775	-6.52	27.9	3.406	1.025	0.997	0.987	15.4745	7.70704
1169	NM_000518.4:c.323G>A	HBB:c.323G>A	NM_000518.4:c.323G>A	NP_000509.1:p.(G108D)	VUS	VUS	Missense codons	11:5246949-5246949	missense_variant	0	0.487112	0.999861		0.997	0	0.994012	0.998392	0.975069	0.9254	0.923	0.914	0.914	0.92966			0.911	0.8955	3.76	5.57391	0.47249	-3.25	4.12	-5.72	25.7	4.33	1.025	0.993	0.984	8.0377	6.54313
1170	NM_000518.4:c.325A>G	HBB:c.325A>G	NM_000518.4:c.325A>G	NP_000509.1:p.(N109D)	VUS	VUS	Missense codons	11:5246947-5246947	missense_variant	0.85	0.487112	0.752781		0.021	0.01	0.171544	0.997773	0.884911	-0.0258	0.759	0.347	0.743	0.43388			0.002	0.5636	4.68	1.62339	0.0961106	-3.23	1.805	-2.18	20.5	1.919	1.137	0.951	0.971	7.0898	1.32359
1171	NM_000518.4:c.325A>C	HBB:c.325A>C	NM_000518.4:c.325A>C	NP_000509.1:p.(N109H)	VUS	VUS	Missense codons	11:5246947-5246947	missense_variant	0	0.487112	0.859981		0.755	0	0.933013	0.995642	0.89491	0.5239	0.728	0.535	0.44	0.66755			0.723	0.7008	4.68	2.94168	-0.0141029	-3.25	1.53	-2.96	25.9	1.919	1.137	0.951	0.971	7.0898	3.13406
1172	NM_000518.4:c.326A>T	HBB:c.326A>T	NM_000518.4:c.326A>T	NP_000509.1:p.(N109I)	VUS	VUS	Missense codons	11:5246946-5246946	missense_variant	0	0.487112	0.992819		0.841		0.994912	0.990252	0.976102	0.9219	0.807	0.739	0.618	0.71516			0.766	0.8627	4.68	3.6806	0.255587	-3.36	3.845	-5.66	27.9	4.438	1.137	0.843	0.956	12.3991	4.27807
1173	NM_000518.4:c.326A>G	HBB:c.326A>G	NM_000518.4:c.326A>G	NP_000509.1:p.(N109S)	VUS	P/LP	Missense codons	11:5246946-5246946	missense_variant	0.08	0.487112	0.936212		0.013	0.01	0.817865	0.997676	0.905309	0.244	0.699	0.487	0.38	0.60156			0.3	0.6499	4.68	1.8355	0.140459	-3.27	2.6	-2.79	22.8	4.438	1.137	0.843	0.956	12.3991	1.61495
1174	NM_000518.4:c.327C>A	HBB:c.327C>A	NM_000518.4:c.327C>A	NP_000509.1:p.(N109K)	VUS	P/LP	Missense codons	11:5246945-5246945	missense_variant	0.07	0.487112	0.978281		0.195	0.03	0.895481	0.980192	0.866613	-0.0674	0.769	0.51	0.451	0.37052			0.338	0.6729	-3.55	0.810392	0.0923236	-3.22	3.04	-3.5	16.4	-0.625	-0.96	0.486	0.93	7.0088	0.845507
1174	NM_000518.4:c.327C>G	HBB:c.327C>G	NM_000518.4:c.327C>G	NP_000509.1:p.(N109K)	VUS	P/LP	Missense codons	11:5246945-5246945	missense_variant	0.07	0.487112	0.97732		0.195		0.873622	0.979593	0.866613	-0.0674	0.769	0.514	0.451	0.30753			0.338	0.6729	-3.55	0.810392	0.0923333	-3.22	3.04	-3.5	16.55	-0.625	-0.96	0.486	0.93	7.0088	0.845507
1176	NM_000518.4:c.328G>C	HBB:c.328G>C	NM_000518.4:c.328G>C	NP_000509.1:p.(V110L)	VUS	P/LP	Missense codons	11:5246944-5246944	missense_variant	0.11	0.487112	1		0.048		0.272916	0.995416	0.873313	0.1576	0.654	0.616	0.916	0.20065			0.275	0.7513	0.678	1.26678	0.344533	-3.16	3.28	-1.03	17.24	-0.202	-0.215	0.482	0.94	7.9485	1.33859
1176	NM_000518.4:c.328G>T	HBB:c.328G>T	NM_000518.4:c.328G>T	NP_000509.1:p.(V110L)	VUS	P/LP	Missense codons	11:5246944-5246944	missense_variant	0.11	0.487112	1		0.048	0.01	0.593591	0.995282	0.873313	0.1576	0.654	0.616	0.916	0.20553			0.275	0.7513	0.678	1.26678	0.344533	-3.16	3.28	-1.03	18.02	-0.202	-0.215	0.482	0.94	7.9485	1.33859
1177	NM_000518.4:c.328G>A	HBB:c.328G>A	NM_000518.4:c.328G>A	NP_000509.1:p.(V110M)	VUS	P/LP	Missense codons	11:5246944-5246944	missense_variant	0.41	0.487112	1		0.099	0.01	0.237355	0.993711	0.90251	-0.3718	0.66	0.622	0.387	0.08564			0.022	0.5641	0.678	1.27944	0.198155	-3.22	1.41	-0.85	17.32	-0.202	-0.215	0.482	0.94	7.9485	1.36369
1180	NM_000518.4:c.334G>T	HBB:c.334G>T	NM_000518.4:c.334G>T	NP_000509.1:p.(V112F)	VUS	VUS	Missense codons	11:5246938-5246938	missense_variant	0	0.487112	0.874458		0.372	0	0.989469	0.994836	0.978502	1.0218	0.617	0.763	0.817	0.42212			0.563	0.8256	4.68	2.86759	0.435655	-3.31	3.48	-2.69	24	0.377	1.025	0.468	0.92	15.4745	3.40453
1181	NM_000518.4:c.335T>C	HBB:c.335T>C	NM_000518.4:c.335T>C	NP_000509.1:p.(V112A)	VUS	VUS	Missense codons	11:5246937-5246937	missense_variant	0.04	0.487112	0.741702		0.36	0.01	0.955212	0.998336	0.866213	0.5636	0.617	0.746	0.83	0.41524			0.463	0.7658	4.68	2.6554	0.388928	-3.23	2.85	-2.56	23.3	2.855	1.311	0.436	0.897	7.0898	2.96669
1182	NM_000518.4:c.337T>C	HBB:c.337T>C	NM_000518.4:c.337T>C	NP_000509.1:p.(C113R)	VUS	P/LP	Missense codons	11:5246935-5246935	missense_variant	0.01	0.487112	0.999996		0.024	0	0.10111	0.785399	0.592041	-0.4454	0.655	0.561	0.762	0.0861			0.407	0.5571	-9.37	0.0352953	0.196708	-3.21	1.98	-2.01	2.878	-1.607	-1.79	0.234	0.835	3.7716	0.047609
1183	NM_000518.4:c.338G>T	HBB:c.338G>T	NM_000518.4:c.338G>T	NP_000509.1:p.(C113F)	VUS	VUS	Missense codons	11:5246934-5246934	missense_variant	0.03	0.487112	0.999992		0.003	0	0.155219	0.923556	0.689231	-0.3687	0.583	0.533	0.803	0.01019			0.364	0.6451	-5.78	0.219559	0.368086	-3.22	2.33	-0.42	11.89	2.116	-0.347	0.27	0.843	13.8588	0.233916
1184	NM_000518.4:c.338G>A	HBB:c.338G>A	NM_000518.4:c.338G>A	NP_000509.1:p.(C113Y)	VUS	VUS	Missense codons	11:5246934-5246934	missense_variant	0	0.487112	0.999997		0.093	0	0.368628	0.954694	0.935306	-0.2775	0.582	0.588	0.818	0.29124			0.452	0.6209	-5.78	0.323817	0.38053	-3.22	2.33	-0.7	11.94	2.116	-0.347	0.27	0.843	13.8588	0.400209
1185	NM_000518.4:c.339T>G	HBB:c.339T>G	NM_000518.4:c.339T>G	NP_000509.1:p.(C113W)	VUS	VUS	Missense codons	11:5246933-5246933	missense_variant	0	0.487112	0.997651		0.655	0	0.943254	0.991998	0.915608	0.6465	0.611	0.693	0.859	0.40265			0.675	0.761	4.68	2.21703	0.393478	-3.26	2.33	-2.03	26	0.201	0.321	0.448	0.865	12.399	2.63362
1186	NM_000518.4:c.340G>C	HBB:c.340G>C	NM_000518.4:c.340G>C	NP_000509.1:p.(V114L)	VUS	VUS	Missense codons	11:5246932-5246932	missense_variant	0.01	0.487112	0.983065		0.106		0.83363	0.989701	0.865313	0.9504	0.615	0.661	0.558	0.61527			0.414	0.8389	4.68	2.51337	0.276445	-3.47	4.025	-1.95	22.6	1.063	1.025	0.619	0.876	15.4745	2.98453
1186	NM_000518.4:c.340G>T	HBB:c.340G>T	NM_000518.4:c.340G>T	NP_000509.1:p.(V114L)	VUS	VUS	Missense codons	11:5246932-5246932	missense_variant	0.01	0.487112	0.982396		0.106	0	0.848254	0.989378	0.865313	0.9504	0.615	0.668	0.558	0.40336			0.414	0.8389	4.68	2.51337	0.276422	-3.47	4.025	-1.95	22.7	1.063	1.025	0.619	0.876	15.4745	2.98453
1187	NM_000518.4:c.341T>A	HBB:c.341T>A	NM_000518.4:c.341T>A	NP_000509.1:p.(V114E)	VUS	B/LB	Missense codons	11:5246931-5246931	missense_variant	0.01	0.500041	0.995228		0.977		0.888901	0.986391	0.923208	0.8224	0.731	0.784	0.888	0.64206			0.825	0.8775	2.42	2.34403	0.257994	-3.54	3.17	-4.02	24	1.682	1.311	0.685	0.882	7.2077	3.15869
1190	NM_000518.4:c.343C>A	HBB:c.343C>A	NM_000518.4:c.343C>A	NP_000509.1:p.(L115M)	VUS	VUS	Missense codons	11:5246929-5246929	missense_variant	0.04	0.500041	0.598789		0.327	0.01	0.145169	0.966396	0.853215	0.3251	0.589	0.591	0.401	0.46655			0.451	0.76	0.276	1.58945	-0.0377123	-3.9	2.705	-1.38	19.42	0.412	0.184	0.704	0.879	3.529	1.96207
1192	NM_000518.4:c.346G>C	HBB:c.346G>C	NM_000518.4:c.346G>C	NP_000509.1:p.(A116P)	VUS	VUS	Missense codons	11:5246926-5246926	missense_variant	0	0.500041	0.999819		0.873		0.989696	0.996925	0.877812	0.9772	0.7	0.872	0.827	0.94979			0.784	0.9158	1.52	2.86205	0.475778	-3.49	4.495	-3.63	23.3	2.033	1.025	0.644	0.818	11.5666	3.96765
1193	NM_000518.4:c.347C>T	HBB:c.347C>T	NM_000518.4:c.347C>T	NP_000509.1:p.(A116V)	VUS	P/LP	Missense codons	11:5246925-5246925	missense_variant	0	0.500041	0.99981		0.078	0	0.925629	0.998389	0.928707	0.7925	0.655	0.793	0.655	0.96857			0.45	0.8332	3.75	2.88388	0.445147	-3.51	4.495	-3.05	22.3	5.947	0.168	0.521	0.768	12.5203	3.36175
1195	NM_000518.4:c.338_349dupGTGTGCTGGCCC	HBB:c.338_349dupGTGTGCTGGCCC	NM_000518.4:c.338_349dupGTGTGCTGGCCC	NP_000509.1:p.(A116_H117insRVLA)	VUS	P/LP	Inframe indels	11:5246933-5246933	protein_altering_variant
1196	NM_000518.4:c.349C>T	HBB:c.349C>T	NM_000518.4:c.349C>T	NP_000509.1:p.(H117Y)	VUS	VUS	Missense codons	11:5246923-5246923	missense_variant	0.44	0.500041	1		0.007	0	0.0740398	0.975558	0.331767	-0.1003	0.573	0.551	0.774	0.21613			0.013	0.6651	1.56	0.493178	0.282826	-3.25	1.67	-0.6	7.871	-0.175	0.196	0.412	0.645	7.5247	0.443244
1197	NM_000518.4:c.350A>C	HBB:c.350A>C	NM_000518.4:c.350A>C	NP_000509.1:p.(H117P)	VUS	VUS	Missense codons	11:5246922-5246922	missense_variant	0.14	0.500041	1		0.015	0	0.0728039	0.87459	0.206979	-0.304	0.571	0.562	0.794	0.07562			0.25	0.6703	-1.65	0.346669	0.33304	-3.25	1.87	-1.3	9.123	-0.86	0.018	0.411	0.63	12.5843	0.352612
1198	NM_000518.4:c.350A>G	HBB:c.350A>G	NM_000518.4:c.350A>G	NP_000509.1:p.(H117R)	VUS	VUS	Missense codons	11:5246922-5246922	missense_variant	0.52	0.500041	1		0.001	0.01	0.0630484	0.667138	0.273673	-0.6276	0.513	0.491	0.26	0.07025			0.009	0.4883	-1.65	0.193511	0.0193768	-3.23	-1.16	-0.06	1.81	-0.86	0.018	0.411	0.63	12.5843	0.150984
1199	NM_000518.4:c.350A>T	HBB:c.350A>T	NM_000518.4:c.350A>T	NP_000509.1:p.(H117L)	VUS	P/LP	Missense codons	11:5246922-5246922	missense_variant	0.33	0.500041	1		0.003		0.0651766	0.818322	0.210379	-0.4121	0.57	0.556	0.447	0.12249			0.024	0.6272	-1.65	0.309684	0.260109	-3.18	1.065	-1.08	7.783	-0.86	0.018	0.411	0.63	12.5843	0.297523
1200	NM_000518.4:c.351T>A	HBB:c.351T>A	NM_000518.4:c.351T>A	NP_000509.1:p.(H117Q)	VUS	P/LP	Missense codons	11:5246921-5246921	missense_variant	0.25	0.500041	1		0.007		0.109649	0.642092	0.136386	-0.4879	0.501	0.598	0.389	0.16471			0.037	0.5539	-5.63	0.0510307	0.147472	-3.22	1.065	-0.27	0.063	-1.062	-0.15	0.417	0.6	3.3325	0.0507285
1200	NM_000518.4:c.351T>G	HBB:c.351T>G	NM_000518.4:c.351T>G	NP_000509.1:p.(H117Q)	VUS	P/LP	Missense codons	11:5246921-5246921	missense_variant	0.25	0.500041	1		0.007	0	0.105669	0.665615	0.136386	-0.4879	0.501	0.598	0.389	0.10863			0.037	0.5539	-5.63	0.0510307	0.147456	-3.22	1.065	-0.27	0.06	-1.062	-0.15	0.417	0.6	3.3325	0.0507285
1201	NM_000518.4:c.352C>A	HBB:c.352C>A	NM_000518.4:c.352C>A	NP_000509.1:p.(H118N)	VUS	VUS	Missense codons	11:5246920-5246920	missense_variant	0.1	0.500041	0.999998		0.026	0.01	0.127883	0.744659	0.564244	0.0599	0.653	0.483	0.43	0.25601			0.287	0.7282	2.71	1.01174	0.115033	-3.35	2.22	-3.81	12.94	1.299	1.175	0.456	0.609	10.5659	1.00002
1202	NM_000518.4:c.352C>T	HBB:c.352C>T	NM_000518.4:c.352C>T	NP_000509.1:p.(H118Y)	VUS	VUS	Missense codons	11:5246920-5246920	missense_variant	0.11	0.500041	0.999997		0.018	0.01	0.238821	0.989649	0.705929	0.0671	0.706	0.56	0.846	0.66121			0.272	0.7266	2.71	1.01452	0.382066	-3.34	2.715	-3.66	12.94	1.299	1.175	0.456	0.609	10.5659	1.00314
1203	NM_000518.4:c.352C>G	HBB:c.352C>G	NM_000518.4:c.352C>G	NP_000509.1:p.(H118D)	VUS	VUS	Missense codons	11:5246920-5246920	missense_variant	0.02	0.500041	0.999993		0.042		0.270946	0.902228	0.637636	0.2806	0.682	0.591	0.48	0.60916			0.386	0.788	2.71	1.11718	0.273895	-3.36	3.81	-5.31	14.97	1.299	1.175	0.456	0.609	10.5659	1.20036
1204	NM_000518.4:c.353A>G	HBB:c.353A>G	NM_000518.4:c.353A>G	NP_000509.1:p.(H118R)	VUS	VUS	Missense codons	11:5246919-5246919	missense_variant	0.07	0.500041	0.999975		0.019	0.01	0.176018	0.89181	0.566543	0.0714	0.741	0.558	0.43	0.86338			0.32	0.7218	3.55	1.28357	0.392804	-3.3	2.265	-4.42	12.92	2.197	1.137	0.463	0.61	8.6214	1.26851
1205	NM_000518.4:c.353A>C	HBB:c.353A>C	NM_000518.4:c.353A>C	NP_000509.1:p.(H118P)	VUS	VUS	Missense codons	11:5246919-5246919	missense_variant	0.01	0.500041	0.999893		0.706	0	0.77018	0.925732	0.89491	0.5417	0.735	0.676	0.895	0.91416			0.659	0.8903	3.55	2.11565	0.463528	-3.37	4.16	-5.74	21.9	2.197	1.137	0.463	0.61	8.6214	2.85054
1207	NM_000518.4:c.355T>G	HBB:c.355T>G	NM_000518.4:c.355T>G	NP_000509.1:p.(F119V)	VUS	VUS	Missense codons	11:5246917-5246917	missense_variant	0	0.500041	0.999972		0.506	0	0.939433	0.960262	0.961804	0.3664	0.606	0.654	0.618	0.7872			0.614	0.8494	1.16	1.62513	0.255612	-3.33	4.18	-3.78	19.27	0.469	0.323	0.403	0.585	7.3482	2.32553
1208	NM_000518.4:c.356T>G	HBB:c.356T>G	NM_000518.4:c.356T>G	NP_000509.1:p.(F119C)	VUS	VUS	Missense codons	11:5246916-5246916	missense_variant	0	0.500041	0.999928		0.932	0	0.975134	0.980318	0.886711	0.51	0.605	0.577	0.582	0.93915			0.823	0.9087	3.52	2.76965	0.309855	-3.42	3.835	-4.65	22.9	5.404	1.311	0.352	0.55	8.9438	3.88397
1209	NM_000518.4:c.356T>A	HBB:c.356T>A	NM_000518.4:c.356T>A	NP_000509.1:p.(F119Y)	VUS	VUS	Missense codons	11:5246916-5246916	missense_variant	0.04	0.500041	0.999994		0.038		0.40038	0.985004	0.764624	0.0887	0.595	0.509	0.518	0.9004			0.351	0.7263	3.52	1.48997	0.148619	-3.37	2.26	-1.22	17.77	5.404	1.311	0.352	0.55	8.9438	1.55705
1210	NM_000518.4:c.359G>A	HBB:c.359G>A	NM_000518.4:c.359G>A	NP_000509.1:p.(G120D)	VUS	VUS	Missense codons	11:5246913-5246913	missense_variant	0.01	0.500041	0.539699		0.105	0	0.428617	0.984664	0.757524	0.7804	0.688	0.63	0.572	0.54144			0.414	0.7699	3.75	1.3025	0.264393	-3.62	3.845	-4.38	17.69	1.577	0.127	0.089	0.4	12.6753	1.61067
1211	NM_000518.4:c.359G>T	HBB:c.359G>T	NM_000518.4:c.359G>T	NP_000509.1:p.(G120V)	VUS	VUS	Missense codons	11:5246913-5246913	missense_variant	0	0.500041	0.999949		0.25	0	0.920406	0.99055	0.843516	0.8232	0.644	0.599	0.648	0.60825			0.47	0.8487	3.75	1.53897	0.387029	-3.7	4.19	-5.65	18.99	1.577	0.127	0.089	0.4	12.6753	2.13438
1212	NM_000518.4:c.359G>C	HBB:c.359G>C	NM_000518.4:c.359G>C	NP_000509.1:p.(G120A)	VUS	VUS	Missense codons	11:5246913-5246913	missense_variant	0.05	0.500041	0.749473		0.036		0.902088	0.994137	0.891611	0.4064	0.681	0.606	0.782	0.3618			0.347	0.7382	3.75	1.05785	0.432028	-3.65	3.39	-3.52	16.26	1.577	0.127	0.089	0.4	12.6753	1.13272
1213	NM_000518.4:c.361A>G	HBB:c.361A>G	NM_000518.4:c.361A>G	NP_000509.1:p.(K121E)	VUS	VUS	Missense codons	11:5246911-5246911	missense_variant	0.14	0.500041	1		0	0	0.0504806	0.816813	0.863714	-0.299	0.424	0.551	0.357	0.24031			0.249	0.6194	-0.625	0.2894	0.128659	-3.27	2.08	-2.24	7.788	-0.756	0.088	0.035	0.175	1.3617	0.283949
1214	NM_000518.4:c.361A>C	HBB:c.361A>C	NM_000518.4:c.361A>C	NP_000509.1:p.(K121Q)	VUS	VUS	Missense codons	11:5246911-5246911	missense_variant	0.05	0.500041	1		0.003	0	0.104597	0.804912	0.851115	0.062	0.433	0.524	0.442	0.23816			0.345	0.7518	-0.625	0.40236	0.16922	-3.31	2.93	-2.23	7.605	-0.756	0.088	0.035	0.175	1.3617	0.469495
1215	NM_000518.4:c.362A>T	HBB:c.362A>T	NM_000518.4:c.362A>T	NP_000509.1:p.(K121I)	VUS	VUS	Missense codons	11:5246910-5246910	missense_variant	0.01	0.500041	1		0.081		0.322317	0.897572	0.963004	0.1301	0.492	0.514	0.442	0.25427			0.412	0.7818	-4.52	0.222411	0.183351	-3.37	3.555	-5.25	13.56	-1.081	-0.163	0.014	0.103	9.4621	0.31011
1216	NM_000518.4:c.363A>C	HBB:c.363A>C	NM_000518.4:c.363A>C	NP_000509.1:p.(K121N)	VUS	VUS	Missense codons	11:5246909-5246909	missense_variant	0.06	0.500041	0.999999		0.007	0	0.0316872	0.840907	0.824018	-0.2154	0.433	0.403	0.42	0.07734			0.323	0.6656	-2.04	0.183361	-0.00756933	-3.28	1.765	-2.75	4.572	-1.119	-1.193	0.008	0.067	0.5432	0.19688
1217	NM_000518.4:c.364G>C	HBB:c.364G>C	NM_000518.4:c.364G>C	NP_000509.1:p.(E122Q)	VUS	P/LP	Missense codons	11:5246908-5246908	missense_variant	0.07	0.500041	1		0.011		0.0634609	0.975887	0.866213	0.2848		0.575	0.509	0.90271			0.32	0.7839	4.68	2.14152	0.0928782	-3.36	3.045	-1.73	17.31	4.942	1.025	0.019	0.06	15.4745	2.28281
1218	NM_000518.4:c.364G>A	HBB:c.364G>A	NM_000518.4:c.364G>A	NP_000509.1:p.(E122K)	VUS	P/LP	Missense codons	11:5246908-5246908	missense_variant	0.08	0.500041	1		0.162	0.1	0.509398	0.989869	0.986801	0.3073	0.659	0.618	0.464	0.8596			0.315	0.7494	4.68	2.58609	0.27568	-3.28	2.81	-2.48	20.5	4.942	1.025	0.019	0.06	15.4745	2.95623
1219	NM_000518.4:c.365A>C	HBB:c.365A>C	NM_000518.4:c.365A>C	NP_000509.1:p.(E122A)	VUS	VUS	Missense codons	11:5246907-5246907	missense_variant	0.39	0.500041	1		0.006	0	0.109354	0.964934	0.870713	0.0701	0.609	0.536	0.824	0.74271			0.016	0.7189	3.54	1.07112	0.323527	-3.28	1.42	-3.18	12.68	2.153	0.192	0.019	0.053	9.1361	0.970556
1220	NM_000518.4:c.365A>G	HBB:c.365A>G	NM_000518.4:c.365A>G	NP_000509.1:p.(E122G)	VUS	VUS	Missense codons	11:5246907-5246907	missense_variant	0.06	0.500041	1		0.014	0.01	0.38013	0.975976	0.884712	0.1825	0.558	0.52	0.493	0.80109			0.323	0.7563	3.54	1.14221	0.244132	-3.29	2.88	-3.65	13.33	2.153	0.192	0.019	0.053	9.1361	1.10296
1221	NM_000518.4:c.365A>T	HBB:c.365A>T	NM_000518.4:c.365A>T	NP_000509.1:p.(E122V)	VUS	VUS	Missense codons	11:5246907-5246907	missense_variant	0.06	0.500041	1		0.069		0.727339	0.95468	0.967103	0.2394	0.652	0.582	0.81	0.73092			0.327	0.7693	3.54	1.39092	0.418886	-3.37	3.3	-4.25	15.23	2.153	0.192	0.019	0.053	9.1361	1.56362
1222	NM_000518.4:c.367T>C	HBB:c.367T>C	NM_000518.4:c.367T>C	NP_000509.1:p.(F123L)	VUS	P/LP	Missense codons	11:5246905-5246905	missense_variant	0.03	0.500041	0.999999		0.132	0	0.963544	0.998419	0.862414	0.7508	0.833	0.81	0.86	0.9871			0.376	0.7974	4.68	3.6639	0.409605	-3.42	2.84	-4.33	23	8.381	1.311	0.045	0.066	12.399	3.90811
1222	NM_000518.4:c.369C>A	HBB:c.369C>A	NM_000518.4:c.369C>A	NP_000509.1:p.(F123L)	VUS	P/LP	Missense codons	11:5246903-5246903	missense_variant	0.03	0.500041	0.999981		0.132	0	0.929861	0.998371	0.862414	0.7119	0.833	0.749	0.86	0.96646			0.376	0.7854	3.77	3.47585	0.390144	-3.42	2.84	-4.33	22.8	5.994	1.175	0.047	0.074	10.5859	3.75913
1222	NM_000518.4:c.369C>G	HBB:c.369C>G	NM_000518.4:c.369C>G	NP_000509.1:p.(F123L)	VUS	P/LP	Missense codons	11:5246903-5246903	missense_variant	0.03	0.500041	0.999981		0.132		0.929861	0.998341	0.862414	0.7119	0.833	0.749	0.86	0.96732			0.376	0.7854	3.77	3.47585	0.390144	-3.42	2.84	-4.33	22.4	5.994	1.175	0.047	0.074	10.5859	3.75913
1223	NM_000518.4:c.368T>C	HBB:c.368T>C	NM_000518.4:c.368T>C	NP_000509.1:p.(F123S)	VUS	P/LP	Missense codons	11:5246904-5246904	missense_variant	0	0.500041	1		0.949	0	0.984362	0.998406	0.889011	1.0682	0.857	0.918	0.944	0.98716			0.838	0.9299	4.68	6.11021	0.528374	-3.57	4.49	-5.94	25	8.381	1.311	0.051	0.073	12.399	7.89717
1225	NM_000518.4:c.371C>A	HBB:c.371C>A	NM_000518.4:c.371C>A	NP_000509.1:p.(T124N)	VUS	VUS	Missense codons	11:5246901-5246901	missense_variant	0.07	0.500041	0.986157		0.052	0	0.196309	0.868573	0.848915	0.5989	0.481	0.466	0.386	0.86574			0.322	0.8119	2.77	1.50217	0.143864	-3.48	2.635	-3.54	13.23	4.185	-0.708	0.014	0.062	11.7355	1.56553
1226	NM_000518.4:c.371C>T	HBB:c.371C>T	NM_000518.4:c.371C>T	NP_000509.1:p.(T124I)	VUS	VUS	Missense codons	11:5246901-5246901	missense_variant	0.05	0.500041	0.985903		0.078	0	0.552867	0.953147	0.817618	0.6999	0.568	0.654	0.891	0.94788			0.351	0.8285	2.77	1.90322	0.47414	-3.63	4.05	-3.93	16.73	4.185	-0.708	0.014	0.062	11.7355	2.3113
1227	NM_000518.4:c.373C>T	HBB:c.373C>T	NM_000518.4:c.373C>T	NP_000509.1:p.(P125S)	VUS	VUS	Missense codons	11:5246899-5246899	missense_variant	0.01	0.500041	0.998617	0.053057	0.174	0	0.642375	0.996126	0.882612	0.5253	0.644	0.613	0.452	0.89364			0.422	0.791	2.79	2.39944	0.292354	-3.43	3.9	-5.53	17.89	4.179	0.223	0.01	0.051	8.2147	3.04942
1228	NM_000518.4:c.374C>A	HBB:c.374C>A	NM_000518.4:c.374C>A	NP_000509.1:p.(P125Q)	VUS	P/LP	Missense codons	11:5246898-5246898	missense_variant	0.02	0.500041	0.99932	0.053057	0.933	0	0.927467	0.984837	0.859414	0.9363	0.743	0.717	0.696	0.97048			0.762	0.9162	2.79	3.49569	0.476559	-3.46	4.45	-5.56	22.6	5.973	0.188	0.005	0.035	8.2205	4.86662
1229	NM_000518.4:c.374C>T	HBB:c.374C>T	NM_000518.4:c.374C>T	NP_000509.1:p.(P125L)	VUS	P/LP	Missense codons	11:5246898-5246898	missense_variant	0.08	0.500041	0.999999	0.053057	0.233	0	0.989779	0.981251	0.921908	0.3997	0.718	0.696	0.836	0.96749			0.324	0.7476	2.79	2.46252	0.474823	-3.44	3.3	-6.57	16.51	5.973	0.188	0.005	0.035	8.2205	3.03645
1230	NM_000518.4:c.374C>G	HBB:c.374C>G	NM_000518.4:c.374C>G	NP_000509.1:p.(P125R)	VUS	B/LB	Missense codons	11:5246898-5246898	missense_variant	0	0.500041	0.99966	0.053057	0.958		0.994903	0.996178	0.856914	0.9398	0.757	0.747	0.869	0.94755			0.846	0.9181	2.79	3.51749	0.498999	-3.46	4.45	-6.35	22.6	5.973	0.188	0.005	0.035	8.2205	4.9086
1231	NM_000518.4:c.379G>C	HBB:c.379G>C	NM_000518.4:c.379G>C	NP_000509.1:p.(V127L)	VUS	VUS	Missense codons	11:5246893-5246893	missense_variant	0.26	0.500041	1		0		0.0500504	0.885481	0.733627	-0.2699	0.27	0.413	0.189	0.21832			0.034	0.6405	-2.23	0.514289	0.0623584	-3.34	1.045	-0.79	7.671	0.06	0.125	0.004	0.221	1.7952	0.534814
1233	NM_000518.4:c.380T>C	HBB:c.380T>C	NM_000518.4:c.380T>C	NP_000509.1:p.(V127A)	VUS	VUS	Missense codons	11:5246892-5246892	missense_variant	0.3	0.500041	1		0.003	0	0.0187376	0.715255	0.50095	-0.4107	0.421	0.36	0.203	0.20839			0.029	0.5965	0.168	0.604316	-0.0168429	-3.37	1.09	-0.82	11.94	0.022	-0.044	0.01	0.344	4.378	0.521987
1234	NM_000518.4:c.380T>A	HBB:c.380T>A	NM_000518.4:c.380T>A	NP_000509.1:p.(V127E)	P/LP	P/LP	Missense codons	11:5246892-5246892	missense_variant	0.01	0.500041	1		0.156		0.782645	0.949237	0.456654	0.2618	0.523	0.646	0.838	0.29657			0.42	0.7874	0.168	1.0286	0.404806	-3.47	3.505	-2.62	17.02	0.022	-0.044	0.01	0.344	4.378	1.24126
1235	NM_000518.4:c.380T>G	HBB:c.380T>G	NM_000518.4:c.380T>G	NP_000509.1:p.(V127G)	VUS	P/LP	Missense codons	11:5246892-5246892	missense_variant	0.01	0.500041	0.999921		0.226	0	0.769816	0.9773	0.862414	0.2719	0.495	0.67	0.788	0.20639			0.428	0.8002	0.168	1.19684	0.377393	-3.46	3.85	-2.82	17.35	0.022	-0.044	0.01	0.344	4.378	1.59133
1236	NM_000518.4:c.382C>A	HBB:c.382C>A	NM_000518.4:c.382C>A	NP_000509.1:p.(Q128K)	VUS	VUS	Missense codons	11:5246890-5246890	missense_variant	0	0.500041	1		0.715	0	0.991138	0.98988	0.979102	1.0193	0.762	0.886	0.934	0.98796			0.704	0.8949	4.68	8.55514	0.499683	-3.28	4.19	-2.75	24.9	9.011	1.175	0.305	0.565	15.4745	9.48047
1237	NM_000518.4:c.382C>G	HBB:c.382C>G	NM_000518.4:c.382C>G	NP_000509.1:p.(Q128E)	P/LP	VUS	Missense codons	11:5246890-5246890	missense_variant	0	0.500041	1		0.81		0.906815	0.990115	0.981135	1.0334	0.701	0.845	0.883	0.98828			0.75	0.9042	4.68	8.96022	0.474123	-3.32	3.5	-1.9	24.3	9.011	1.175	0.305	0.565	15.4745	10.0362
1241	NM_000518.4:c.385G>C	HBB:c.385G>C	NM_000518.4:c.385G>C	NP_000509.1:p.(A129P)	VUS	P/LP	Missense codons	11:5246887-5246887	missense_variant	0	0.500041	0.999996		0.781		0.996357	0.997565	0.968203	1.0543	0.753	0.9	0.885	0.96784			0.737	0.9168	4.68	6.6833	0.473081	-3.47	4.305	-3.22	26.2	2.804	1.025	0.53	0.818	15.4745	7.60502
1242	NM_000518.4:c.386C>T	HBB:c.386C>T	NM_000518.4:c.386C>T	NP_000509.1:p.(A129V)	VUS	VUS	Missense codons	11:5246886-5246886	missense_variant	0.03	0.500041	0.999763		0.028	0	0.89732	0.99507	0.867913	0.2622	0.666	0.664	0.769	0.54979			0.366	0.7192	1.75	1.661	0.362673	-3.43	2.235	-2.73	22.6	0.073	1.175	0.575	0.891	6.2609	1.69759
1243	NM_000518.4:c.386C>A	HBB:c.386C>A	NM_000518.4:c.386C>A	NP_000509.1:p.(A129D)	VUS	VUS	Missense codons	11:5246886-5246886	missense_variant	0	0.500041	0.999941		0.578	0	0.987387	0.99659	0.961904	0.6983	0.731	0.858	0.697	0.61859			0.643	0.8448	1.75	2.77582	0.45057	-3.36	4.305	-4.17	23.7	0.073	1.175	0.575	0.891	6.2609	3.60029
1244	NM_000518.4:c.388G>C	HBB:c.388G>C	NM_000518.4:c.388G>C	NP_000509.1:p.(A130P)	VUS	P/LP	Missense codons	11:5246884-5246884	missense_variant	0.02	0.500041	0.999201		0.698		0.983243	0.995968	0.868613	0.8712		0.799	0.855	0.78078			0.634	0.9261	0.615	2.59973	0.49554	-4.3	4.155	-2.99	23.7	0.923	0.094	0.576	0.957	5.0835	3.52628
1245	NM_000518.4:c.389C>T	HBB:c.389C>T	NM_000518.4:c.389C>T	NP_000509.1:p.(A130V)	VUS	VUS	Missense codons	11:5246883-5246883	missense_variant	0.04	0.500041	0.998778		0.025	0	0.403032	0.995897	0.824018	0.7643		0.818	0.507	0.94591			0.35	0.869	2.76	2.72062	0.254304	-4.26	3.055	-2.5	22.9	3.555	0.188	0.572	0.972	12.9881	2.82539
1246	NM_000518.4:c.389C>A	HBB:c.389C>A	NM_000518.4:c.389C>A	NP_000509.1:p.(A130D)	VUS	VUS	Missense codons	11:5246883-5246883	missense_variant	0.01	0.500041	0.999683		0.04	0	0.9644	0.997154	0.805419	0.8801	0.547	0.797	0.73	0.94479			0.408	0.9006	2.76	2.87662	0.475268	-4.31	3.055	-3.63	22.9	3.555	0.188	0.572	0.972	12.9881	3.06116
1248	NM_000518.4:c.391T>G	HBB:c.391T>G	NM_000518.4:c.391T>G	NP_000509.1:p.(Y131D)	VUS	VUS	Missense codons	11:5246881-5246881	missense_variant	0	0.500041	0.90566		0.609	0	0.987649	0.991735	0.913609	0.3502	0.641	0.765	0.672	0.90689			0.655	0.7783	4.68	3.83019	0.451161	-3.3	2.865	-5.11	25	3.486	1.311	0.567	0.985	12.399	3.78425
1249	NM_000518.4:c.392A>G	HBB:c.392A>G	NM_000518.4:c.392A>G	NP_000509.1:p.(Y131C)	VUS	P/LP	Missense codons	11:5246880-5246880	missense_variant	0.02	0.500041	0.999965		0.023	0	0.137663	0.974821	0.873413	-0.444	0.581	0.519	0.672	0.05806			0.384	0.5612	-7.08	0.290036	0.335215	-3.31	1.545	-3.66	15.52	-0.643	-0.781	0.539	0.988	9.4208	0.281193
1250	NM_000518.4:c.392A>C	HBB:c.392A>C	NM_000518.4:c.392A>C	NP_000509.1:p.(Y131S)	VUS	P/LP	Missense codons	11:5246880-5246880	missense_variant	0.01	0.500041	0.999978		0.058	0	0.647699	0.964722	0.70483	-0.2972	0.622	0.52	0.825	0.21877			0.409	0.6306	-7.08	0.343419	0.342872	-3.28	2.52	-4.34	15.29	-0.643	-0.781	0.539	0.988	9.4208	0.364848
1251	NM_000518.4:c.394C>G	HBB:c.394C>G	NM_000518.4:c.394C>G	NP_000509.1:p.(Q132E)	VUS	VUS	Missense codons	11:5246878-5246878	missense_variant	0.12	0.500041	0.999725		0.006		0.631368	0.984353	0.729427	0.346	0.633	0.56	0.45	0.87936			0.261	0.7316	4.68	3.13774	0.163134	-3.22	1.625	-1.74	20.6	3.688	1.175	0.86	0.992	11.1978	2.74802
1252	NM_000518.4:c.394C>A	HBB:c.394C>A	NM_000518.4:c.394C>A	NP_000509.1:p.(Q132K)	VUS	VUS	Missense codons	11:5246878-5246878	missense_variant	0.01	0.500041	0.999867		0.051	0	0.973793	0.986714	0.830117	0.683	0.728	0.776	0.858	0.94816			0.409	0.8125	4.68	3.82575	0.450055	-3.23	3.695	-2.81	23.2	3.688	1.175	0.86	0.992	11.1978	3.56985
1253	NM_000518.4:c.395A>G	HBB:c.395A>G	NM_000518.4:c.395A>G	NP_000509.1:p.(Q132R)	VUS	VUS	Missense codons	11:5246877-5246877	missense_variant	0.01	0.500041	0.999942		0.076	0	0.97406	0.995369	0.954504	0.7507	0.706	0.907	0.752	0.98221			0.411	0.8275	4.68	4.17706	0.486892	-3.26	4.04	-2.79	23.7	7.211	1.137	0.949	0.995	12.3991	3.82237
1254	NM_000518.4:c.395A>C	HBB:c.395A>C	NM_000518.4:c.395A>C	NP_000509.1:p.(Q132P)	VUS	VUS	Missense codons	11:5246877-5246877	missense_variant	0	0.500041	0.999997		0.869	0	0.994622	0.99385	0.836816	1.0054	0.702	0.938	0.815	0.98294			0.782	0.8967	4.68	8.11881	0.502236	-3.32	4.04	-4.25	26.2	7.211	1.137	0.949	0.995	12.3991	8.76788
1255	NM_000518.4:c.396G>C	HBB:c.396G>C	NM_000518.4:c.396G>C	NP_000509.1:p.(Q132H)	VUS	VUS	Missense codons	11:5246876-5246876	missense_variant	0.02	0.500041	0.999965		0.051		0.952149	0.99696	0.844516	0.5728	0.628	0.823	0.662	0.89851			0.386	0.7759	3.77	2.77435	0.295266	-3.31	3.145	-3.52	23	2.07	1.025	0.976	0.996	10.9359	2.68101
1256	NM_000518.4:c.397A>G	HBB:c.397A>G	NM_000518.4:c.397A>G	NP_000509.1:p.(K133E)	P/LP	VUS	Missense codons	11:5246875-5246875	missense_variant	0.03	0.500041	0.999998		0.26	0	0.995851	0.999058	0.978652	0.9329	0.736	0.921	0.831	0.98221			0.392	0.8624	4.68	6.59135	0.469577	-3.61	4.575	-2.92	24.3	7.211	1.137	0.987	0.996	12.3991	6.77846
1257	NM_000518.4:c.397A>C	HBB:c.397A>C	NM_000518.4:c.397A>C	NP_000509.1:p.(K133Q)	VUS	VUS	Missense codons	11:5246875-5246875	missense_variant	0	0.500041	0.999997		0.737	0	0.994566	0.995007	0.984102	1.0701	0.758	0.953	0.776	0.98294			0.714	0.9311	4.68	8.58873	0.510832	-3.7	4.575	-3.13	26.2	7.211	1.137	0.987	0.996	12.3991	9.49486
1258	NM_000518.4:c.398A>C	HBB:c.398A>C	NM_000518.4:c.398A>C	NP_000509.1:p.(K133T)	VUS	VUS	Missense codons	11:5246874-5246874	missense_variant	0	0.500041	0.999998		0.924	0	0.99527	0.997656	0.954705	1.008	0.783	0.966	0.778	0.95527			0.818	0.9355	3.55	5.68941	0.504002	-3.71	4.575	-4.79	25.4	3.59	0.196	0.989	0.996	8.6812	6.92722
1259	NM_000518.4:c.399A>C	HBB:c.399A>C	NM_000518.4:c.399A>C	NP_000509.1:p.(K133N)	VUS	VUS	Missense codons	11:5246873-5246873	missense_variant	0	0.500041	0.999984		0.959	0	0.993593	0.997192	0.89841	0.95	0.777	0.871	0.825	0.87622			0.847	0.9344	1.76	3.42802	0.228543	-3.72	4.575	-3.94	24.3	2.05	0.139	0.993	0.996	7.987	4.32073
1259	NM_000518.4:c.399A>T	HBB:c.399A>T	NM_000518.4:c.399A>T	NP_000509.1:p.(K133N)	VUS	VUS	Missense codons	11:5246873-5246873	missense_variant	0	0.500041	0.999984		0.959		0.993593	0.997237	0.89841	0.95	0.777	0.871	0.825	0.87273			0.847	0.9344	1.76	3.42802	0.228542	-3.72	4.575	-3.94	24.4	2.05	0.139	0.993	0.996	7.987	4.32073
1260	NM_000518.4:c.400G>C	HBB:c.400G>C	NM_000518.4:c.400G>C	NP_000509.1:p.(V134L)	VUS	VUS	Missense codons	11:5246872-5246872	missense_variant	1	0.500041	0.780004		0		0.173339	0.944363	0.814119	-0.6252	0.638	0.513	0.784	0.67268			0	0.3312	0.107	1.09208	0.260233	-3.11	0.61	0.49	14.75	1.214	1.025	0.997	0.997	2.549	0.700275
1261	NM_000518.4:c.400G>A	HBB:c.400G>A	NM_000518.4:c.400G>A	NP_000509.1:p.(V134M)	VUS	VUS	Missense codons	11:5246872-5246872	missense_variant	0.15	0.500041	0.757104		0.033	0	0.292051	0.971435	0.864713	-0.3878	0.63	0.563	0.824	0.82523			0.242	0.5279	0.107	1.48456	0.362999	-3.36	1.87	-0.02	18.83	1.214	1.025	0.997	0.997	2.549	1.25641
1262	NM_000518.4:c.401T>C	HBB:c.401T>C	NM_000518.4:c.401T>C	NP_000509.1:p.(V134A)	VUS	VUS	Missense codons	11:5246871-5246871	missense_variant	0.04	0.500041	0.839033		0.015	0	0.918326	0.997458	0.70273	0.5147	0.649	0.694	0.847	0.98615			0.349	0.7174	4.68	3.55222	0.453075	-3.22	2.82	-1.47	23.8	8.399	1.311	0.999	0.998	12.399	2.99281
1263	NM_000518.4:c.404T>C	HBB:c.404T>C	NM_000518.4:c.404T>C	NP_000509.1:p.(V135A)	P/LP	VUS	Missense codons	11:5246868-5246868	missense_variant	0.03	0.500041	0.520422		0.065	0	0.210735	0.988642	0.809419	0.3906		0.651	0.794	0.88696			0.369	0.7726	1.06	1.88053	0.183391	-3.32	3.56	-2.41	22.1	2.416	1.311	1	0.999	4.2489	1.98542
1264	NM_000518.4:c.404T>A	HBB:c.404T>A	NM_000518.4:c.404T>A	NP_000509.1:p.(V135E)	VUS	P/LP	Missense codons	11:5246868-5246868	missense_variant	0.01	0.500041	0.944735		0.048		0.740209	0.980386	0.810419	0.2787	0.729	0.667	0.656	0.90762			0.409	0.7591	1.06	1.91603	0.452631	-3.35	3.91	-3.76	22.5	2.416	1.311	1	0.999	4.2489	2.04106
1265	NM_000518.4:c.406G>C	HBB:c.406G>C	NM_000518.4:c.406G>C	NP_000509.1:p.(A136P)	VUS	P/LP	Missense codons	11:5246866-5246866	missense_variant	0.02	0.500041	0.999563		0.224		0.69136	0.992641	0.663534	0.0345	0.611	0.679	0.776	0.418			0.405	0.6971	-2.13	1.3687	0.434998	-3.41	4.055	-1.97	21.4	0.116	-0.251	0.997	0.999	1.8714	1.81707
1266	NM_000518.4:c.407C>A	HBB:c.407C>A	NM_000518.4:c.407C>A	NP_000509.1:p.(A136D)	VUS	VUS	Missense codons	11:5246865-5246865	missense_variant	0.06	0.500041	0.999952		0.009	0	0.913671	0.995013	0.620138	0.4736	0.543	0.612	0.575	0.67698			0.323	0.7548	3.77	1.85822	0.446519	-3.26	3.36	-1.7	22.5	2.182	1.175	0.998	1	10.8991	1.85147
1267	NM_000518.4:c.407C>T	HBB:c.407C>T	NM_000518.4:c.407C>T	NP_000509.1:p.(A136V)	VUS	VUS	Missense codons	11:5246865-5246865	missense_variant	0.06	0.500041	0.999793		0.003	0	0.771646	0.996105	0.717528	0.632	0.377	0.565	0.395	0.64858			0.323	0.81	3.77	1.95436	0.282074	-3.43	3.36	-1.71	22.6	2.182	1.175	0.998	1	10.8991	2.02133
1268	NM_000518.4:c.409G>T	HBB:c.409G>T	NM_000518.4:c.409G>T	NP_000509.1:p.(G137C)	VUS	VUS	Missense codons	11:5246863-5246863	missense_variant	0.12	0.500041	0.996973		0.995	0	0.988974	0.996599	0.877212	0.9083	0.647	0.637	0.488	0.75122			0.718	0.8683	4.68	4.15355	0.285615	-3.3	3.025	-2.73	26	2.616	1.025	0.999	1	15.4745	4.73537
1269	NM_000518.4:c.409G>A	HBB:c.409G>A	NM_000518.4:c.409G>A	NP_000509.1:p.(G137S)	VUS	VUS	Missense codons	11:5246863-5246863	missense_variant	0.81	0.500041	0.987575		0.343	0	0.940122	0.998216	0.855914	0.7088	0.58	0.651	0.38	0.80274			0.108	0.7731	4.68	3.30849	0.219206	-3.25	2.335	-1.78	22.7	2.616	1.025	0.999	1	15.4745	3.56136
1270	NM_000518.4:c.409G>C	HBB:c.409G>C	NM_000518.4:c.409G>C	NP_000509.1:p.(G137R)	VUS	VUS	Missense codons	11:5246863-5246863	missense_variant	0.47	0.500041	0.994114		0.991		0.99125	0.999265	0.867113	0.949	0.654	0.717	0.628	0.7324			0.455	0.8765	4.68	4.28038	0.40357	-3.25	3.025	-2.98	24.5	2.616	1.025	0.999	1	15.4745	4.94378
1271	NM_000518.4:c.410G>C	HBB:c.410G>C	NM_000518.4:c.410G>C	NP_000509.1:p.(G137A)	VUS	VUS	Missense codons	11:5246862-5246862	missense_variant	1	0.500041	0.830188		0.034		0.290206	0.995603	0.829717	0.2814	0.59	0.406	0.308	0.43889			0.002	0.5846	4.68	2.00083	0.113441	-3.16	1.53	-1.21	17.82	1.224	1.025	0.999	0.999	15.4745	1.82793
1272	NM_000518.4:c.410G>A	HBB:c.410G>A	NM_000518.4:c.410G>A	NP_000509.1:p.(G137D)	VUS	P/LP	Missense codons	11:5246862-5246862	missense_variant	0.5	0.500041	0.947157		0.865	0	0.96587	0.998304	0.805919	1.0407	0.7	0.758	0.837	0.48449			0.345	0.8895	4.68	3.98092	0.261418	-3.3	3.485	-2.84	23.5	1.224	1.025	0.999	0.999	15.4745	4.66447
1274	NM_000518.4:c.415G>C	HBB:c.415G>C	NM_000518.4:c.415G>C	NP_000509.1:p.(A139P)	VUS	P/LP	Missense codons	11:5246857-5246857	missense_variant	0.01	0.487112	0.99995		0.988		0.992403	0.997817	0.980402	1.0666	0.765	0.915	0.963	0.97068			0.843	0.9289	4.68	8.41978	0.485328	-3.51	3.51	-3.57	27.9	4.286	1.025	0.989	0.998	15.4745	9.36185
1275	NM_000518.4:c.415G>A	HBB:c.415G>A	NM_000518.4:c.415G>A	NP_000509.1:p.(A139T)	VUS	VUS	Missense codons	11:5246857-5246857	missense_variant	0.04	0.487112	0.999844		0.24	0	0.993409	0.999047	0.938606	0.821	0.702	0.807	0.669	0.9508			0.373	0.8038	4.68	5.35288	0.295504	-3.46	3.055	-2.84	24.4	4.286	1.025	0.989	0.998	15.4745	5.18889
1276	NM_000518.4:c.416C>T	HBB:c.416C>T	NM_000518.4:c.416C>T	NP_000509.1:p.(A139V)	VUS	VUS	Missense codons	11:5246856-5246856	missense_variant	0.51	0.487112	0.997174		0.079	0	0.844397	0.998689	0.924508	0.2164	0.695	0.654	0.39	0.78513			0.014	0.6351	3.77	3.41381	0.185016	-3.36	2.17	-2.73	19.9	3.446	1.175	0.971	0.997	7.2915	3.45183
1277	NM_000518.4:c.418A>T	HBB:c.418A>T	NM_000518.4:c.418A>T	NP_000509.1:p.(N140Y)	VUS	P/LP	Missense codons	11:5246854-5246854	missense_variant	0.28	0.487112	1		0.48		0.419358	0.985035	0.667533	0.0691	0.516	0.585	0.689	0.13399			0.191	0.7183	0.75	1.11389	0.16302	-3.37	2.595	-2.29	18.37	0.337	0.199	0.898	0.993	4.027	1.21305
1278	NM_000518.4:c.418A>G	HBB:c.418A>G	NM_000518.4:c.418A>G	NP_000509.1:p.(N140D)	VUS	VUS	Missense codons	11:5246854-5246854	missense_variant	0.21	0.487112	1		0.003	0	0.0954314	0.990184	0.29847	-0.2705	0.479	0.294	0.463	0.18223			0.044	0.6015	0.75	0.842487	0.0674077	-3.27	1.765	-1.76	14.72	0.337	0.199	0.898	0.993	4.027	0.731835
1280	NM_000518.4:c.419A>C	HBB:c.419A>C	NM_000518.4:c.419A>C	NP_000509.1:p.(N140T)	VUS	VUS	Missense codons	11:5246853-5246853	missense_variant	0.34	0.487112	1		0.003	0	0.0384078	0.808434	0.340966	-0.5265	0.504	0.426	0.792	0.08164			0.023	0.5099	-7.88	0.0906087	0.0393096	-3.3	0.455	-2.08	5.371	-0.206	-1.405	0.882	0.988	15.6329	0.0729505
1281	NM_000518.4:c.420T>A	HBB:c.420T>A	NM_000518.4:c.420T>A	NP_000509.1:p.(N140K)	VUS	VUS	Missense codons	11:5246852-5246852	missense_variant	0.09	0.487112	0.999877		0.031		0.502168	0.986203	0.157184	0.0456	0.407	0.341	0.504	0.2801			0.298	0.711	3.56	1.39002	0.1214	-3.31	2.94	-2.33	18.39	0.189	1.311	0.95	0.992	8.3947	1.30124
1281	NM_000518.4:c.420T>C	HBB:c.420T>C	NM_000518.4:c.420T>C	NP_000509.1:p.(N140K)	VUS	VUS	Missense codons	11:5246852-5246852	synonymous_variant						0																	2.94		8.779
1282	NM_000518.4:c.421G>A	HBB:c.421G>A	NM_000518.4:c.421G>A	NP_000509.1:p.(A141T)	VUS	P/LP	Missense codons	11:5246851-5246851	missense_variant	0	0.487112	0.99999		0.985	0	0.987081	0.998941	0.983402	1.0301	0.819	0.899	0.686	0.9249			0.877	0.9141	3.76	5.21232	0.481091	-3.44	3.56	-2.94	25.6	3.439	1.025	0.969	0.993	12.8153	6.0249
1283	NM_000518.4:c.422C>A	HBB:c.422C>A	NM_000518.4:c.422C>A	NP_000509.1:p.(A141D)	VUS	VUS	Missense codons	11:5246850-5246850	missense_variant	0	0.487112	0.999999		0.999	0	0.998622	0.997646	0.975002	1.0309	0.846	0.935	0.819	0.9695			0.935	0.9238	3.77	6.87469	0.502915	-3.46	4.365	-4.41	26	5.811	1.175	0.976	0.994	10.8751	8.17578
1284	NM_000518.4:c.422C>T	HBB:c.422C>T	NM_000518.4:c.422C>T	NP_000509.1:p.(A141V)	VUS	P/LP	Missense codons	11:5246850-5246850	missense_variant	0.01	0.487112	0.999997		0.991	0	0.97569	0.998767	0.922508	0.7897	0.855	0.884	0.851	0.96516			0.85	0.8351	3.77	5.3164	0.437033	-3.35	2.18	-3.11	25.9	5.811	1.175	0.976	0.994	10.8751	5.56683
1287	NM_000518.4:c.424_426delCTG	HBB:c.424_426delCTG	NM_000518.4:c.424_426delCTG	NP_000509.1:p.(L142del)	VUS	P/LP	Inframe indels	11:5246845-5246848	inframe_deletion						0																			21.1
1288	NM_000518.4:c.425_433delTGGCCCACA	HBB:c.425_433delTGGCCCACA	NM_000518.4:c.425_433delTGGCCCACA	NP_000509.1:p.(L142_K145delinsQ)	VUS	P/LP	Inframe indels	11:5246838-5246847	inframe_deletion																									21.2
1289	NM_000518.4:c.425T>G	HBB:c.425T>G	NM_000518.4:c.425T>G	NP_000509.1:p.(L142R)	P/LP	VUS	Missense codons	11:5246847-5246847	missense_variant	0	0.487112	1		0.928	0	0.993262	0.997392	0.974802	1.0923	0.788	0.957	0.991	0.97537			0.82	0.9579	4.68	8.77373	0.555639	-4.22	4.53	-4.65	27.9	8.395	1.311	0.995	0.994	12.399	9.90133
1290	NM_000518.4:c.429_430delCC	HBB:c.429_430delCC	NM_000518.4:c.429_430delCC	NP_000509.1:p.(H144Qfs*21)	VUS	P/LP	Frameshift	11:5246841-5246843	frameshift_variant						0																			33
1291	NM_000518.4:c.427G>A	HBB:c.427G>A	NM_000518.4:c.427G>A	NP_000509.1:p.(A143T)	VUS	VUS	Missense codons	11:5246845-5246845	missense_variant	0.06	0.487112	0.685537		0.056	0	0.674229	0.996246	0.863614	0.2478	0.384	0.566	0.627	0.84225			0.326	0.5894	3.77	2.3079	0.213938	-3.28	1.975	-2.21	22.2	1.693	1.025	0.998	0.994	7.2719	2.07136
1292	NM_000518.4:c.427G>C	HBB:c.427G>C	NM_000518.4:c.427G>C	NP_000509.1:p.(A143P)	VUS	P/LP	Missense codons	11:5246845-5246845	missense_variant	0.04	0.487112	0.890544		0.065		0.980461	0.997771	0.875612	0.6415	0.559	0.749	0.731	0.9227			0.353	0.7639	3.77	2.85339	0.46246	-3.38	4.07	-3.22	23.1	1.693	1.025	0.998	0.994	7.2719	2.8544
1293	NM_000518.4:c.428C>A	HBB:c.428C>A	NM_000518.4:c.428C>A	NP_000509.1:p.(A143D)	VUS	P/LP	Missense codons	11:5246844-5246844	missense_variant	0	0.487112	0.933865		0.565	0	0.994272	0.996605	0.954805	0.922	0.538	0.816	0.887	0.92847			0.637	0.8397	4.68	5.67028	0.473067	-3.35	4.07	-3.86	25.5	2.718	1.175	0.998	0.994	11.1978	5.91681
1294	NM_000518.4:c.431delA	HBB:c.431delA	NM_000518.4:c.431delA	NP_000509.1:p.(H144Pfs*15)	VUS	P/LP	Frameshift	11:5246840-5246841	frameshift_variant						0
1295	NM_000518.4:c.430C>G	HBB:c.430C>G	NM_000518.4:c.430C>G	NP_000509.1:p.(H144D)	VUS	P/LP	Missense codons	11:5246842-5246842	missense_variant	0.04	0.487112	0.932038		0.253		0.986947	0.988177	0.780422	0.6341	0.632	0.704	0.885	0.80375			0.375	0.7233	4.68	3.37471	0.426514	-3.21	2.405	-4.38	23.4	3.192	1.175	0.999	0.992	15.4745	3.08289
1296	NM_000518.4:c.430C>A	HBB:c.430C>A	NM_000518.4:c.430C>A	NP_000509.1:p.(H144N)	VUS	VUS	Missense codons	11:5246842-5246842	missense_variant	0.06	0.487112	0.795713		0.018	0	0.949188	0.960863	0.808919	0.7537	0.603	0.575	0.918	0.7771			0.323	0.7913	4.68	3.10276	0.209412	-3.22	3.03	-2.96	22.2	3.192	1.175	0.999	0.992	15.4745	2.80801
1297	NM_000518.4:c.430C>T	HBB:c.430C>T	NM_000518.4:c.430C>T	NP_000509.1:p.(H144Y)	VUS	P/LP	Missense codons	11:5246842-5246842	missense_variant	0.1	0.487112	0.84015		0.007	0	0.554284	0.994081	0.863414	0.6354		0.653	0.882	0.86029			0.286	0.7684	4.68	2.96068	0.413674	-3.3	2.75	-2.86	21.9	3.192	1.175	0.999	0.992	15.4745	2.63569
1298	NM_000518.4:c.431A>T	HBB:c.431A>T	NM_000518.4:c.431A>T	NP_000509.1:p.(H144L)	VUS	P/LP	Missense codons	11:5246841-5246841	missense_variant	0.15	0.487112	0.969656		0.007		0.983458	0.967903	0.760524	0.4209	0.557	0.557	0.613	0.91522			0.241	0.7309	4.68	2.47532	0.245379	-3.29	2.825	-5.09	22.2	0.519	1.137	1	0.992	12.3991	2.19829
1299	NM_000518.4:c.431A>G	HBB:c.431A>G	NM_000518.4:c.431A>G	NP_000509.1:p.(H144R)	VUS	P/LP	Missense codons	11:5246841-5246841	missense_variant	0.86	0.487112	0.870068		0.003	0	0.147551	0.980179	0.820118	0.0739	0.638	0.533	0.819	0.75229			0.001	0.6048	4.68	2.02459	0.258851	-3.2	1.74	-2.47	17.06	0.519	1.137	1	0.992	12.3991	1.62984
1300	NM_000518.4:c.431A>C	HBB:c.431A>C	NM_000518.4:c.431A>C	NP_000509.1:p.(H144P)	VUS	P/LP	Missense codons	11:5246841-5246841	missense_variant	0.04	0.487112	0.967001		0.497	0	0.984355	0.964938	0.813219	0.8035	0.595	0.791	0.754	0.8907			0.515	0.7973	4.68	3.79231	0.431056	-3.26	2.83	-4.35	24.5	0.519	1.137	1	0.992	12.3991	3.8437
1301	NM_000518.4:c.432C>A	HBB:c.432C>A	NM_000518.4:c.432C>A	NP_000509.1:p.(H144Q)	VUS	P/LP	Missense codons	11:5246840-5246840	missense_variant	0.08	0.487112	0.730724		0.025	0	0.874851	0.972535	0.938606	0.4602	0.555	0.66	0.893	0.79733			0.301	0.697	3.77	2.42194	0.272114	-3.25	2.92	-3.04	19.21	2.117	1.175	0.999	0.99	7.2915	2.23389
1301	NM_000518.4:c.432C>G	HBB:c.432C>G	NM_000518.4:c.432C>G	NP_000509.1:p.(H144Q)	VUS	P/LP	Missense codons	11:5246840-5246840	missense_variant	0.08	0.487112	0.730724		0.025		0.69739	0.974868	0.938606	0.4602	0.555	0.66	0.893	0.82771			0.301	0.697	3.77	2.42194	0.272122	-3.25	2.92	-3.04	19.09	2.117	1.175	0.999	0.99	7.2915	2.23389
1302	NM_000518.4:c.434delA	HBB:c.434delA	NM_000518.4:c.434delA	NP_000509.1:p.(K145Sfs*14)	VUS	P/LP	Frameshift	11:5246837-5246838	frameshift_variant						0																			27.6
1303	NM_000518.4:c.433A>G	HBB:c.433A>G	NM_000518.4:c.433A>G	NP_000509.1:p.(K145E)	VUS	P/LP	Missense codons	11:5246839-5246839	missense_variant	0.13	0.487112	0.999668		0.007	0	0.383005	0.996748	0.858914	0.3257	0.422	0.573	0.529	0.81843			0.253	0.7441	3.55	2.1597	0.245198	-3.39	2.96	-1.93	20.8	1.233	1.137	0.997	0.987	6.2107	2.07173
1304	NM_000518.4:c.434A>T	HBB:c.434A>T	NM_000518.4:c.434A>T	NP_000509.1:p.(K145M)	VUS	P/LP	Missense codons	11:5246838-5246838	missense_variant	0	0.487112	0.999908		0.501		0.989647	0.992084	0.975102	0.565	0.414	0.72	0.52	0.93207			0.612	0.8247	-0.345	2.42849	0.267726	-3.5	4.06	-3.3	23.4	1.855	1.137	0.99	0.981	8.679	3.06439
1305	NM_000518.4:c.435G>C	HBB:c.435G>C	NM_000518.4:c.435G>C	NP_000509.1:p.(K145N)	VUS	P/LP	Missense codons	11:5246837-5246837	missense_variant	0.02	0.487112	0.999994		0.025		0.782132	0.989605	0.873913	-0.0797	0.419	0.508	0.763	0.75809			0.384	0.7509	-2.8	0.990862	0.157626	-3.42	3.37	-2.5	18.21	0.119	-0.737	0.968	0.97	2.291	0.972989
1305	NM_000518.4:c.435G>T	HBB:c.435G>T	NM_000518.4:c.435G>T	NP_000509.1:p.(K145N)	VUS	P/LP	Missense codons	11:5246837-5246837	missense_variant	0.02	0.487112	0.999993		0.025	0	0.70069	0.98948	0.873913	-0.0797	0.419	0.506	0.763	0.73194			0.384	0.7509	-2.8	0.990862	0.157621	-3.42	3.37	-2.5	18.61	0.119	-0.737	0.968	0.97	2.291	0.972989
1306	NM_000518.4:c.436_437insCT	HBB:c.436_437insCT	NM_000518.4:c.436_437insCT	NP_000509.1:p.(Y146Sfs*14)	VUS	P/LP	Inframe indels	11:5246835-5246835	frameshift_variant
1307	NM_000518.4:c.436T>A	HBB:c.436T>A	NM_000518.4:c.436T>A	NP_000509.1:p.(Y146N)	VUS	P/LP	Missense codons	11:5246836-5246836	missense_variant	0	0.487112	1		0.937		0.995077	0.988945	0.9961	1.0672	0.851	0.931	0.948	0.97612			0.828	0.9291	4.68	7.92625	0.510962	-3.65	4.53	-6.92	26.7	6.613	1.311	0.972	0.966	12.399	9.22415
1308	NM_000518.4:c.436T>C	HBB:c.436T>C	NM_000518.4:c.436T>C	NP_000509.1:p.(Y146H)	VUS	P/LP	Missense codons	11:5246836-5246836	missense_variant	0	0.487112	1		0.369	0	0.983178	0.996002	0.926807	0.9294	0.853	0.926	0.821	0.97637			0.562	0.8623	4.68	5.70114	0.48902	-3.64	3.49	-3.77	24.1	6.613	1.311	0.972	0.966	12.399	5.92089
1309	NM_000518.4:c.436T>G	HBB:c.436T>G	NM_000518.4:c.436T>G	NP_000509.1:p.(Y146D)	VUS	P/LP	Missense codons	11:5246836-5246836	missense_variant	0.01	0.487112	1		0.45	0	0.998347	0.989105	0.985701	0.9852	0.87	0.939	0.737	0.96555			0.553	0.8851	4.68	6.35507	0.507785	-3.65	4.53	-7.73	25.8	6.613	1.311	0.972	0.966	12.399	6.87379
1310	NM_000518.4:c.437A>G	HBB:c.437A>G	NM_000518.4:c.437A>G	NP_000509.1:p.(Y146C)	VUS	P/LP	Missense codons	11:5246835-5246835	missense_variant	0	0.487112	1		0.993	0.01	0.993581	0.997625	0.995712	1.0569	0.851	0.965	0.886	0.98093			0.895	0.9239	4.68	8.15789	0.523908	-3.66	4.185	-6.92	27	7.208	1.137	0.969	0.959	12.3991	9.23595
1311	NM_000518.4:c.438T>A	HBB:c.438T>A	NM_000518.4:c.438T>A	NP_000509.1:p.(Y146*)	VUS	P/LP	Stop gained	11:5246834-5246834	stop_gained		0.487112	0.896202					0.99486					0.71	0.74634					1.66	2.82635	0.549544				39	2.426	0.225	0.955	0.945	6.0383	3.83662
1312	NM_000518.4:c.439C>G	HBB:c.439C>G	NM_000518.4:c.439C>G	NP_000509.1:p.(H147D)	VUS	P/LP	Missense codons	11:5246833-5246833	missense_variant	0	0.487112	0.999224		0.876		0.988617	0.99161	0.981135	0.96	0.685	0.857	0.723	0.9372			0.786	0.8963	4.68	6.5762	0.487446	-3.43	4.16	-7.03	25	4.707	1.175	0.942	0.939	8.9525	7.23552
1313	NM_000518.4:c.439C>T	HBB:c.439C>T	NM_000518.4:c.439C>T	NP_000509.1:p.(H147Y)	VUS	P/LP	Missense codons	11:5246833-5246833	missense_variant	0.02	0.487112	0.999567		0.146	0	0.961192	0.997233	0.927907	0.6804	0.67	0.809	0.874	0.88907			0.396	0.8016	4.68	3.9328	0.464935	-3.45	3.61	-4.67	23.1	4.707	1.175	0.942	0.939	8.9525	3.73382
1314	NM_000518.4:c.440A>C	HBB:c.440A>C	NM_000518.4:c.440A>C	NP_000509.1:p.(H147P)	VUS	P/LP	Missense codons	11:5246832-5246832	missense_variant	0	0.487112	0.999596		0.974	0	0.997091	0.977571	0.978052	0.9922	0.697	0.883	0.862	0.87882			0.861	0.9087	4.68	5.58003	0.478843	-3.44	3.815	-7.69	24.7	1.999	1.137	0.898	0.928	7.8605	6.41772
1315	NM_000518.4:c.440A>T	HBB:c.440A>T	NM_000518.4:c.440A>T	NP_000509.1:p.(H147L)	VUS	P/LP	Missense codons	11:5246832-5246832	missense_variant	0	0.487112	0.999617		0.76		0.944661	0.97644	0.978502	0.9112	0.698	0.865	0.85	0.85349			0.726	0.8743	4.68	4.96798	0.468678	-3.43	3.815	-8.47	24.8	1.999	1.137	0.898	0.928	7.8605	5.477
1316	NM_000518.4:c.440A>G	HBB:c.440A>G	NM_000518.4:c.440A>G	NP_000509.1:p.(H147R)	VUS	VUS	Missense codons	11:5246832-5246832	missense_variant	0.01	0.487112	0.99822		0.76	0	0.852672	0.99683	0.983668	0.4094	0.613	0.722	0.535	0.8118			0.687	0.6906	4.68	3.98483	0.227079	-2.95	1.59	-6.25	23.9	1.999	1.137	0.898	0.928	7.8605	4.00732
1317	NM_000518.4:c.441C>G	HBB:c.441C>G	NM_000518.4:c.441C>G	NP_000509.1:p.(H147Q)	VUS	P/LP	Missense codons	11:5246831-5246831	missense_variant	0.03	0.487112	0.99988		0.351		0.991419	0.994035	0.978002	0.6808	0.663	0.829	0.876	0.93678			0.475	0.7884	3.77	3.92846	0.468433	-3.41	3.12	-6.26	22.6	3.314	-0.127	0.752	0.907	10.9981	4.26251
1318	NM_000518.4:c.441C>A	HBB:c.441C>A	NM_000518.4:c.441C>A	NP_000509.1:p.(H147Q)	VUS	P/LP	Missense codons	11:5246831-5246831	missense_variant	0.03	0.487112	0.999884		0.351	0	0.99182	0.993738	0.978002	0.6808	0.663	0.828	0.876	0.87784			0.475	0.7884	3.77	3.92846	0.468411	-3.41	3.12	-6.26	22.6	3.314	-0.127	0.752	0.907	10.9981	4.26251
1319	NM_000518.4:c.440_441dupAC	HBB:c.440_441dupAC	NM_000518.4:c.440_441dupAC	NP_000509.1:p.(*148Text*11)	VUS	P/LP	Stop lost	11:5246831-5246831	frameshift_variant
1320	NM_000518.4:c.442_443dupTA	HBB:c.442_443dupTA	NM_000518.4:c.442_443dupTA	NP_000509.1:p.(*148Yext*11)	P/LP	P/LP	Stop lost	11:5246829-5246829	frameshift_variant,stop_lost
2023	NM_000517.4:c.353T>C	HBA2:c.353T>C	NM_000517.4:c.353T>C	NP_000508.1:p.(F118S)	P/LP	P/LP	Missense codons	16:223523-223523	missense_variant	0	0.59774	0.998693	5e-06	0.988	0	0.998219	0.998156		1.0187	0.894	0.926	0.69	0.89947			0.882	0.926	4.07	4.44006	0.493964	-3.35	4.5	-5.93	25.8	2.26	1.126	0.029	0.394	9.0834	5.7393
2024	NM_000518.4:c.430delC	HBB:c.430delC	NM_000518.4:c.430delC	NP_000509.1:p.(H144Tfs*15)	B/LB	P/LP	Frameshift	11:5246841-5246842	frameshift_variant						0																			33
2036	NC_000011.9:g.5248770G>A	NG_000007.3:g.70076C>T	NG_000007.3:g.70076C>T		B/LB	B/LB		11:5248770-5248770	upstream_gene_variant																									0.308
2037	NC_000011.9:g.5248641G>A	NG_000007.3:g.70205C>T	NG_000007.3:g.70205C>T		B/LB	B/LB		11:5248641-5248641	upstream_gene_variant																									2.683
2039	NC_000011.9:g.5248355C>T	NG_000007.3:g.70491G>A	NG_000007.3:g.70491G>A		B/LB	B/LB	Promoter	11:5248355-5248355	upstream_gene_variant																									10.38
2040	NC_000011.9:g.5248343G>C	NG_000007.3:g.70503C>G	NG_000007.3:g.70503C>G		B/LB	B/LB	Promoter	11:5248343-5248343	upstream_gene_variant																									13.65
2041	NM_000518.4:c.9T>C	NG_000007.3:g.70603T>C	NG_000007.3:g.70603T>C	NP_000509.1:p.(H3=)	B/LB	B/LB	Synonymous substitution	11:5248243-5248243	synonymous_variant						0.02																			0.319
2044	NM_000518.4:c.90C>G	NG_000007.3:g.70684C>G	NG_000007.3:g.70684C>G	NP_000509.1:p.(G30=)	B/LB	B/LB	Synonymous substitution	11:5248162-5248162	splice_region_variant,synonymous_variant															0.964837	0.72									22.6							1.719	21.2827
2045	NM_000518.4:c.92+16A>C	NG_000007.3:g.70702A>C	NG_000007.3:g.70702A>C	NP_000509.1:p.?	B/LB	B/LB		11:5248144-5248144	intron_variant						0.01																			5.151
2046	NM_000518.4:c.93-40C>T	HBB:c.93-40C>T	NM_000518.4:c.93-40C>T	NP_000509.1:p.?	B/LB	B/LB		11:5248069-5248069	intron_variant						0.01																			14.46
2047	NM_000518.4:c.93-38G>A	NG_000007.3:g.70779G>A	NG_000007.3:g.70779G>A	NP_000509.1:p.?	B/LB	B/LB		11:5248067-5248067	intron_variant						0																			13.69
2048	NM_000518.4:c.108C>T	NG_000007.3:g.70832C>T	NG_000007.3:g.70832C>T	NP_000509.1:p.(Y36=)	B/LB	B/LB	Synonymous substitution	11:5248014-5248014	synonymous_variant						0.01																			9.334
2049	NM_000518.4:c.153T>A	NG_000007.3:g.70877T>A	NG_000007.3:g.70877T>A	NP_000509.1:p.(T51=)	B/LB	B/LB	Synonymous substitution	11:5247969-5247969	synonymous_variant																									9.424
2050	NM_000518.4:c.180G>A	HBB:c.180G>A	NM_000518.4:c.180G>A	NP_000509.1:p.(K60=)	B/LB	B/LB	Synonymous substitution	11:5247942-5247942	synonymous_variant						0																			4.464
2051	NM_000518.4:c.267G>C	NG_000007.3:g.70991G>C	NG_000007.3:g.70991G>C	NP_000509.1:p.(L89=)	B/LB	B/LB	Synonymous substitution	11:5247855-5247855	synonymous_variant																									3.609
2053	NM_000518.4:c.315+26T>G	NG_000007.3:g.71065T>G	NG_000007.3:g.71065T>G	NP_000509.1:p.?	B/LB	B/LB		11:5247781-5247781	intron_variant						0																			2.544
2054	NM_000518.4:c.315+74T>G	HBB:c.315+74T>G	NM_000518.4:c.315+74T>G	NP_000509.1:p.?	B/LB	B/LB		11:5247733-5247733	intron_variant						0																			6.056
2055	NM_000518.4:c.315+260A>G	NG_000007.3:g.71299A>G	NG_000007.3:g.71299A>G	NP_000509.1:p.?	B/LB	B/LB		11:5247547-5247547	intron_variant						0																			1.169
2056	NM_000518.4:c.316-185C>T	HBB:c.316-185C>T	NM_000518.4:c.316-185C>T	NP_000509.1:p.?	B/LB	B/LB		11:5247141-5247141	intron_variant						0																			1.665
2058	NM_000518.4:c.369C>T	NG_000007.3:g.71943C>T	NG_000007.3:g.71943C>T	NP_000509.1:p.(F123=)	B/LB	B/LB	Synonymous substitution	11:5246903-5246903	synonymous_variant						0																			8.919
2059	NM_000518.4:c.420T>C	NG_000007.3:g.71994T>C	NG_000007.3:g.71994T>C	NP_000509.1:p.(N140=)	B/LB	B/LB	Synonymous substitution	11:5246852-5246852	synonymous_variant						0																			8.779
2060	NM_000518.4:c.*4C>T	NG_000007.3:g.72022C>T	NG_000007.3:g.72022C>T	NP_000509.1:p.?	B/LB	B/LB		11:5246824-5246824	3_prime_UTR_variant						0																			7.199
2061	NM_000518.4:c.*67G>T	NG_000007.3:g.72085C>T	NG_000007.3:g.72085C>T	NP_000509.1:p.?	B/LB	B/LB		11:5246761-5246761	3_prime_UTR_variant						0																			0.674
2063	NM_000518.4:c.*104G>A	HBB:c.*104G>A	NM_000518.4:c.*104G>A	NP_000509.1:p.?	B/LB	B/LB		11:5246724-5246724	3_prime_UTR_variant						0																			13.17
2064	NC_000011.9:g.5246693A>T	NG_000007.3:g.72153T>A	NG_000007.3:g.72153T>A		P/LP	B/LB		11:5246693-5246693	downstream_gene_variant																									4.65
2171	NC_000011.9:g.5248372G>A	NG_000007.3:g.70474C>T	NG_000007.3:g.70474C>T		P/LP	P/LP	Promoter	11:5248372-5248372	upstream_gene_variant																									13.93
2172	NC_000011.9:g.5248342T>G	HBB:c.-91A>C	NM_000518.4:c.-91A>C		VUS	P/LP	Promoter	11:5248342-5248342	upstream_gene_variant																									13.25
2173	NM_000518.4:c.93-22delT	HBB:c.93-22delT	NM_000518.4:c.93-22delT	NP_000509.1:p.?	P/LP	VUS		11:5248050-5248051	intron_variant						0
2174	NM_000518.4:c.74delG	HBB:c.74delG	NM_000518.4:c.74delG	NP_000509.1:p.(G25Vfs*37)	P/LP	P/LP	Frameshift	11:5248177-5248178	frameshift_variant						0.2																			33
2175	NC_000011.9:g.5248327T>G	HBB:c.-76A>C	NM_000518.4:c.-76A>C		VUS	P/LP	Promoter	11:5248327-5248327	upstream_gene_variant																									19.33
2176	NM_000518.4:c.-12C>T	NG_000007.3:g.70583C>T	NG_000007.3:g.70583C>T	NP_000509.1:p.?	P/LP	P/LP	5'UTR	11:5248263-5248263	5_prime_UTR_variant						0																			13.02
2177	NM_000518.4:c.*32A>C	HBB:*32A>C	NM_000518.4:*32A>C	NP_000509.1:p.?	P/LP	P/LP	Other 3'UTR site	11:5246796-5246796	3_prime_UTR_variant						0																			5.872
2178	NC_000011.9:g.5248389G>C	HBB:c.-138C>G	NM_000518.4:c.-138C>G		P/LP	P/LP	Promoter	11:5248389-5248389	upstream_gene_variant																									15.61
2179	NC_000011.9:g.5248331A>C	HBB:c.-80T>G	NM_000518.4:c.-80T>G		P/LP	P/LP	Promoter	11:5248331-5248331	upstream_gene_variant																									22.2
2180	NM_000518.4:c.18_19delTG	HBB:c.18_19delTG	NM_000518.4:c.18_19delTG	NP_000509.1:p.(E7Gfs*16)	P/LP	P/LP	Frameshift	11:5248232-5248234	frameshift_variant						0																			22.3
2181	NM_000518.4:c.219dupT	HBB:c.219dupT	NM_000518.4:c.219dupT	NP_000509.1:p.(D74*)	VUS	P/LP	Stop gained	11:5247902-5247902	frameshift_variant
2182	NM_000518.4:c.315+2_315+13delTGAGTCTATGGG	HBB:c.315+2_315+13delTGAGTCTATGGG	NM_000518.4:c.315+2_315+13delTGAGTCTATGGG	NP_000509.1:p.?	P/LP	P/LP	Splice region variant; Splice donor	11:5247793-5247805	splice_donor_variant,intron_variant
2183	NM_000518.4:c.316-70C>G	HBB:c.316-70C>G	NM_000518.4:c.316-70C>G	NP_000509.1:p.?	P/LP	VUS	Cryptic splice site	11:5247026-5247026	intron_variant																									1.592
2184	NM_000518.4:c.20_45del26bp	HBB:c.20_45del26bp	NM_000518.4:c.20_45del26bp	NP_000509.1:p.(E7Vfs*8)	P/LP	P/LP	Frameshift	11:5248206-5248232	frameshift_variant
2185	NM_000518.4:c.27_28insAGAA	HBB:c.27_28insAGAA	NM_000518.4:c.27_28insAGAA	NP_000509.1:p.(S10Rfs*15)	P/LP	P/LP	Frameshift	11:5248224-5248224	frameshift_variant
2187	NM_000518.4:c.146delT	HBB:c.146delT	NM_000518.4:c.146delT	NP_000509.1:p.(L49Rfs*13)	P/LP	P/LP	Frameshift	11:5247975-5247976	frameshift_variant						0																			32
2188	NM_000518.4:c.201delA	HBB:c.201delA	NM_000518.4:c.201delA	NP_000509.1:p.(V68Cfs*22)	P/LP	P/LP	Frameshift	11:5247920-5247921	frameshift_variant						0.01																			23
2189	NM_000518.4:c.210delT	HBB:c.210delT	NM_000518.4:c.210delT	NP_000509.1:p.(A71Pfs*19)	VUS	P/LP	Frameshift	11:5247911-5247912	frameshift_variant						0																			21
2191	NM_000518.4:c.323_334delGGCAACGTGCTGG	HBB:c.323_334delGGCAACGTGCTGG	NM_000518.4:c.323_334delGGCAACGTGCTGG	NP_000509.1:p.(G108_L111del)	P/LP	P/LP	Inframe indels	11:5246937-5246949	inframe_deletion
2192	NM_000518.4:c.339_345dupTGTGCTG	HBB:c.339_345dupTGTGCTG	NM_000518.4:c.339_345dupTGTGCTG	NP_000509.1:p.(A116Cfs*27)	P/LP	P/LP	Frameshift	11:5246932-5246932	frameshift_variant
2193	NM_000518.4:c.354delC	HBB:c.354delC	NM_000518.4:c.354delC	NP_000509.1:p.(F119Lfs*40)	P/LP	P/LP	Frameshift	11:5246917-5246918	frameshift_variant						0.01
2194	NM_000518.4:c.375dupA	HBB:c.375dupA	NM_000518.4:c.375dupA	NP_000509.1:p.(P126Tfs*15)	P/LP	P/LP	Frameshift	11:5246896-5246896	frameshift_variant
2195	NM_000518.4:c.377_382delCAGTGC	HBB:c.377_382delCAGTGC	NM_000518.4:c.377_382delCAGTGC	NP_000509.1:p.(P126_V127del)	VUS	P/LP	Inframe indels	11:5246889-5246895	inframe_deletion
2196	NM_000518.4:c.393T>A	HBB:c.393T>A	NM_000518.4:c.393T>A	NP_000509.1:p.(Y131*)	P/LP	P/LP	Stop gained	11:5246879-5246879	stop_gained		0.500041	1					0.971433					0.527	0.23632					-4.96	1.04146	0.60412				35	-0.014	-0.386	0.564	0.988	9.0564	1.76222
2197	NM_000518.4:c.395dupA	HBB:c.395dupA	NM_000518.4:c.395dupA	NP_000509.1:p.(K133Efs*8)	VUS	P/LP	Frameshift	11:5246876-5246876	frameshift_variant
2198	NM_000518.4:c.*112A>T	HBB:c.*112A>T	NM_000518.4:c.*112A>T	NP_000509.1:p.?	P/LP	VUS	RNA cleavage - Poly(A) signal	11:5246716-5246716	3_prime_UTR_variant																									14.64
2200	NM_000518.4:c.316-86_316-85insCTGCTTTTATTTT	HBB:c.316-86_316-85insCTGCTTTTATTTT	NM_000518.4:c.316-86_316-85insCTGCTTTTATTTT	NP_000509.1:p.?	P/LP	P/LP	Cryptic splice site	11:5247041-5247041	intron_variant
2203	NM_000558.5:c.-9G>C	HBA1:c.-9G>C	NM_000558.5:c.-9G>C	NP_000549.1:p.?	P/LP	B/LB	5'UTR	16:226707-226707	5_prime_UTR_variant						0																			8.244
2204	NM_000558.5:c.95+4A>G	HBA1:c.95+4A>G	NM_000558.5:c.95+4A>G	NP_000549.1:p.?	P/LP	P/LP	Splice region variant	16:226814-226814	splice_region_variant,intron_variant						0.19									0.981949	0.678									19.04							4.002	47.5919
2205	NM_000558.5:c.62_63insT	HBA1:c.62_63insT	NM_000558.5:c.62_63insT	NP_000549.1:p.(A22Rfs*36)	P/LP	P/LP	Frameshift	16:226777-226777	frameshift_variant						0.01																			23
2206	NM_000517.4:c.27delC	HBA2:c.27delC	NM_000517.4:c.27delC	NP_000508.1:p.(N10Tfs*40)	P/LP	P/LP	Frameshift	16:222937-222938	frameshift_variant						0
2207	NM_000517.4:c.66_67insT	HBA2:c.66_67insT	NM_000517.4:c.66_67insT	NP_000508.1:p.(G23Wfs*35)	P/LP	VUS	Frameshift	16:222977-222977	frameshift_variant						0.08
2208	NM_000517.4:c.75T>G	HBA2:c.75T>G	NM_000517.4:c.75T>G	NP_000508.1:p.(Y25*)	P/LP	P/LP	Stop gained	16:222986-222986	stop_gained		0.516011	1	0.000267		0.21		0.987337					0.476	0.16921					0.426	1.22431	0.60412				33	-1.423	-0.499	0.001	0.179	7.5443	2.10629
2209	NM_000517.4:c.98T>G	HBA2:c.98T>G	NM_000517.4:c.98T>G	NP_000508.1:p.(M33R)	P/LP	P/LP	Splice region variant; Missense codons	16:223126-223126	missense_variant,splice_region_variant	0	0.516011	1	1e-06	0.904	0.15	0.987878	0.968269		0.8213	0.859	0.89	0.89	0.91105			0.803	0.8851	1.42	2.82527	0.276904	-3.3	3.95	-3.8	23	0.799	-0.183	0.34	0.972	7.3987	3.71723	0.699	5.22695
2210	NM_000517.4:c.94A>C	HBA2:c.94A>C	NM_000517.4:c.94A>C	NP_000508.1:p.(R32=)	P/LP	P/LP	Cryptic splice site, Synonymous substitution	16:223005-223005	splice_region_variant,synonymous_variant						0.26									0.923923	0.906									22							0.481	5.72006
2211	NM_000517.4:c.112delC	HBA2:c.112delC	NM_000517.4:c.112delC	NP_000508.1:p.(T39Pfs*11)	P/LP	P/LP	Frameshift	16:223139-223140	frameshift_variant						0
2212	NM_000558.5:c.95+45G>C	HBA1:c.95+45G>C	NM_000558.5:c.95+45G>C	NP_000549.1:p.?	P/LP	VUS		16:226855-226855	intron_variant						0																			0.514
2214	NM_000517.4:c.131delT	HBA2:c.131delT	NM_000517.4:c.131delT	NP_000508.1:p.(F44Sfs*6)	P/LP	P/LP	Frameshift	16:223158-223159	frameshift_variant						0
2215	NM_000517.4:c.132delC	HBA2:c.132delC	NM_000517.4:c.132delC	NP_000508.1:p.(P45Rfs*5)	P/LP	P/LP	Frameshift	16:223159-223160	frameshift_variant						0																			25.4
2216	NM_000517.4:c.143delA	HBA2:c.143delA	NM_000517.4:c.143delA	NP_000508.1:p.(D48Afs*2)	P/LP	P/LP	Frameshift	16:223170-223171	frameshift_variant						0																			23.9
2217	NM_000517.4:c.156_157insG	HBA2:c.156_157insG	NM_000517.4:c.156_157insG	NP_000508.1:p.(S53Vfs*5)	P/LP	P/LP	Frameshift	16:223184-223184	frameshift_variant						0
2218	NM_000517.4:c.190_231del	HBA2:c.190_231del	NM_000517.4:c.190_231del	NP_000508.1:p.(A64_M77del)	P/LP	P/LP	Inframe indels	16:223217-223259	inframe_deletion
2219	NM_000517.4:c.244delT	HBA2:c.244delT	NM_000517.4:c.244delT	NP_000508.1:p.(S82Pfs*3)	P/LP	P/LP	Frameshift	16:223271-223272	frameshift_variant						0																			25.4
2220	NM_000517.4:c.305T>C	HBA2:c.305T>C	NM_000517.4:c.305T>C	NP_000508.1:p.(L102P)	P/LP	P/LP	Missense codons	16:223475-223475	missense_variant	0	0.59774	1	2.4e-05	0.995	0	0.996552	0.998748		1.084	0.865	0.963	0.864	0.95112			0.902	0.9427	4.24	5.96471	0.515621	-3.49	4.125	-6.45	28.1	5.551	1.111	0.934	0.827	12.5712	6.99097
2221	NM_000517.4:c.349_359delGAGTTCACCCC	HBA2:c.349_359delGAGTTCACCCC	NM_000517.4:c.349_359delGAGTTCACCCC	NP_000508.1:p.(E117Cfs*53)	P/LP	P/LP	Frameshift	16:223518-223529	frameshift_variant
2222	NM_000558.5:c.301-3C>G	HBA1:c.301-3C>G	NM_000558.5:c.301-3C>G	NP_000549.1:p.?	P/LP	P/LP	Splice region variant	16:227279-227279	splice_region_variant,intron_variant						0.99									0.999599	0.946									28.1							12.392	126.811
2224	NM_000558.5:c.333_345delCGCCCACCTCCCC	HBA1:c.333_345delCGCCCACCTCCCC	NM_000558.5:c.333_345delCGCCCACCTCCCC	NP_000549.1:p.(A112Pfs*18)	P/LP	P/LP	Frameshift	16:227313-227326	frameshift_variant
2225	NM_000558.5:c.*96G>A	HBA1:c.*96G>A	NM_000558.5:c.*96G>A	NP_000549.1:p.?	P/LP	P/LP	RNA cleavage - Poly(A) signal	16:227506-227506	3_prime_UTR_variant						0																			12.95
2226	NM_000517.4:c.*46C>A	HBA2:c.*46C>A	NM_000517.4:c.*46C>A	NP_000508.1:p.?	B/LB	P/LP	Other 3'UTR site	16:223645-223645	3_prime_UTR_variant						0																			7.685
2228	NM_000517.4:c.*107A>G	HBA2:c.*107A>G	NM_000517.4:c.*107A>G	NP_000508.1:p.?	P/LP	B/LB	Other 3'UTR site	16:223706-223706	3_prime_UTR_variant						0																			1.938
2279	NM_000518.4:c.308_309insTC	HBB:c.308insTC	NM_000518.4:c.308insTC	NP_000509.1:p.(N103Ifs*57)	VUS	P/LP	Frameshift	11:5247813-5247813	frameshift_variant
2280	NM_000518.4:c.116C>G	HBB:c.116C>G	NM_000518.4:c.116C>G	NP_000509.1:p.(T39S)	VUS	VUS	Missense codons	11:5248006-5248006	missense_variant	0	0.487112	1		0.949		0.995879	0.997184	0.867413	0.867	0.949	0.858	0.885	0.95694			0.838	0.8424	5.1	11.0992	0.405558	-2.57	3.655	-3.65	25.4	9.297	1.175	1	0.999	17.6123	10.7285
2281	NM_000517.4:c.251T>G	HBA2: c.251T>G	NM_000517.4: c.251T>G	NP_000508.1:p.(L84R)	P/LP	VUS	Missense codons	16:223279-223279	missense_variant	0	0.676563	0.999986	0	0.999	0	0.999161	0.994702		1.0856	0.93	0.915	0.951	0.96726			0.935	0.9638	4.22	3.56518	0.565176	-4.34	4.705	-5.75	23.6	7.381	1.04	0.05	0.023	12.555	5.12698
2282	NM_000518.4:c.420dupT	HBB:c.420dupT	NM_000518.4:c.420dupT	NP_000509.1:p.(A141Cfs*25)	VUS	P/LP	Frameshift	11:5246851-5246851	frameshift_variant																									33
2284	NM_000518.4:c.424C>G	HBB:c.424C>G	NM_000518.4:c.424C>G	NP_000509.1:p.(L142V)	VUS	P/LP	Missense codons	11:5246848-5246848	missense_variant	0.04	0.487112	1		0.098		0.947628	0.99662	0.89721	0.8483	0.746	0.922	0.834	0.96725			0.356	0.8665	3.76	3.44758	0.363437	-4.11	4.185	-2.41	22.9	7.193	0.229	0.986	0.993	12.1527	3.28412
2285	NM_000558.5:c.62A>C	HBA1:c.62A>C	NM_000558.5:c.62A>C	NP_000549.1:p.(H21P)	VUS	P/LP	Missense codons	16:226777-226777	missense_variant	0.02	0.623552	1	0.000151	0.7	0.02	0.953814	0.952874	0.953705	0.8736	0.745	0.717	0.793	0.9771			0.635	0.8461	4.43	2.13966	0.294466	-3.18		-6.32	22.2	5.77	1.172	0.003	0.001	13.1824	2.5287
2297	NM_000518.4:c.428C>T	HBB:c.428C>T	NM_000518.4:c.428C>T	NP_000509.1:p.(A143V)	P/LP	P/LP	Missense codons	11:5246844-5246844	missense_variant	0.01	0.487112	0.766179		0.344	0	0.98065	0.997831	0.875712	0.8525	0.538	0.733	0.841	0.92891			0.514	0.7652	4.68	4.86294	0.448028	-3.32	3.265	-2.81	23.9	2.718	1.175	0.998	0.994	11.1978	4.82384
2298	NM_000518.4:c.53A>T	HBB:c.53A>T	NM_000518.4:c.53A>T	NP_000509.1:p.(K18M)	VUS	P/LP	Missense codons	11:5248199-5248199	missense_variant	0	0.487112	0.999958		0.993		0.993575	0.995414	0.911209	1.0043	0.541	0.857	0.847	0.95966			0.895	0.8786	5.24	6.75149	0.281497	-2.55	4.53	-5.13	24.8	4.433	1.137	0.467	0.442	14.3909	8.22766
2303	NM_000558.5:c.301C>T	HBA1:c.301C>T	NM_000558.5:c.301C>T	NP_000549.1:p.(L101F)	VUS	VUS	Splice region variant; Missense codons	16:227282-227282	missense_variant,splice_region_variant	0.19	0.676563	0.995798	0.048743	0.154	0	0.219576	0.945773	0.857914	0.2888	0.686	0.594	0.088	0.44279	0.000133727	0.03	0.063	0.7836	1.3	2.46903	0.134915	-3.33		-1.51	15.45	-0.178	-0.251	0.868	0.583	7.8983	3.78629	0.218	2.23086
2304	NM_000517.4:c.308G>A	HBA2:c.308G>A	NM_000517.4:c.308G>A	NP_000508.1:p.(S103N)	VUS	VUS	Missense codons	16:223478-223478	missense_variant	0.08	0.59774	0.998957	0.05019	0.01	0	0.122723	0.983028		-0.1344	0.617	0.465	0.282	0.20607			0.3	0.6567	0.786	1.17424	0.0939373	-3.2	2.435	-1.98	18.86	-0.139	1.147	0.987	0.931	4.6116	1.10988
2305	NM_000558.5:c.302T>C	HBA1:c.302T>C	NM_000558.5:c.302T>C	NP_000549.1:p.(L101P)	VUS	VUS	Splice region variant; Missense codons	16:227283-227283	missense_variant,splice_region_variant	0.02	0.676563	1	0.048743	0.986	0.01	0.991102	0.997917	0.786121	0.8143	0.778	0.823	0.748	0.92886	0.0154319	0.232	0.818	0.8431	4.45	7.77634	0.48207	-3.35		-5.82	25.5	5.502	1.12	0.952	0.69	8.7574	11.1961	0.131	1.34056
2306	NM_000517.4:c.4G>C	HBA2:c.4G>C	NM_000517.4:c.4G>C	NP_000508.1:p.(V2L)	VUS	P/LP	Missense codons	16:222915-222915	missense_variant	0.17	0.516011	1	0.16974	0.007	0.01	0.362957	0.966291		0.4993	0.848	0.691	0.792	0.93404			0.059	0.7371	2.81	2.16642	0.267089	-3.1	3.09	-1.53	16.03	2.927	1.133	0.996	0.844	9.7028	2.20008
2307	NM_000518.4:c.241A>C	HBB:c.241A>C	NM_000518.4:c.241A>C	NP_000509.1:p.(N81H)	VUS	VUS	Missense codons	11:5247881-5247881	missense_variant	0.04	0.487112	0.808864		0.921	0	0.891004	0.99296	0.819918	0.7882	0.74	0.67	0.593	0.89352			0.72	0.855	-0.0512	1.7494	0.165465	-3.49	3.155	-3.19	21.9	0.386	0.204	0.99	0.777	9.2322	2.13597
2308	NM_000517.4:c.264C>G	HBA2:c.264C>G	NM_000517.4:c.264C>G	NP_000508.1:p.(H88Q)	VUS	P/LP	Missense codons	16:223292-223292	missense_variant	0	0.676563	0.999988	0	0.847	0	0.999599	0.982129		1.0802	0.993	0.743	0.781	0.49832			0.77	0.9922	0.796	1.62361	0.492445	-7.53	4.735	-7.65	21.4	-0.58	0.081	0.785	0.253	4.7892	2.47157
2310	NM_000558.5:c.88C>G	HBA1:c.88C>G	NM_000558.5:c.88C>G	NP_000549.1:p.(L30V)	VUS	VUS	Missense codons	16:226803-226803	missense_variant	0.04	0.623552	0.999959	3.2e-05	0.418	0	0.925774	0.994804	0.885811	0.7073	0.802	0.802	0.429	0.94822			0.484	0.8345	3.46	2.74699	0.22165	-3.64		-2.66	20.4	1.043	0.006	0.845	0.793	8.2031	2.84456
2311	NM_000517.4:c.274C>T	HBA2: c.274C>T	NM_000517.4: c.274C>T	NP_000508.1:p.(L92F)	VUS	P/LP	Missense codons	16:223302-223302	missense_variant	0.01	0.676563	0.999933	1e-06	0.996	0	0.991354	0.996952		0.8278	0.52	0.81	0.603	0.79314			0.867	0.8734	3.26	2.875	0.268194	-3.3	3.54	-3.47	23.2	3.588	0.071	0.802	0.311	8.1054	3.62162
2313	NM_000558.5:c.86C>T	HBA1:c.86C>T	NM_000558.5:c.86C>T	NP_000549.1:p.(A29V)	VUS	VUS	Missense codons	16:226801-226801	missense_variant	0.01	0.623552	0.999914	6e-06	0.538	0.05	0.992217	0.999108	0.918508	0.8482	0.727	0.822	0.668	0.98388			0.588	0.85	3.47	3.19884	0.287626	-3.19		-2.93	23.7	3.987	0.92	0.822	0.748	13.5275	3.25409
2315	NM_000558.5:c.332C>T	HBA1:c.332C>T	NM_000558.5:c.332C>T	NP_000549.1:p.(A111V)	VUS	VUS	Missense codons	16:227313-227313	missense_variant	0.01	0.676563	0.999995	4e-06	0.193	0	0.868409	0.995763	0.913509	0.9117	0.764	0.804	0.602	0.96713			0.424	0.8745	3.46	2.06651	0.200814	-3.36		-3.68	21.2	5.403	1.012	0.729	0.599	13.943	2.41089
2316	NM_000558.5:c.343C>G	HBA1:c.343C>G	NM_000558.5:c.343C>G	NP_000549.1:p.(P115A)	VUS	VUS	Missense codons	16:227324-227324	missense_variant	0.01	0.676563	0.999997	6e-06	0.001	0	0.894138	0.859798	0.872113	0.2907	0.526	0.554	0.16	0.14729			0.406	0.7717	-0.922	0.801063	0.193203	-3.19		-5.23	11.78	-0.372	-0.23	0.001	0.006	12.0947	1.01745
2317	NM_000558.5:c.63C>A	HBA1:c.63C>A	NM_000558.5:c.63C>A	NP_000549.1:p.(H21Q)	VUS	B/LB	Missense codons	16:226778-226778	missense_variant	0.67	0.623552	0.989601	0.000151	0.036	0	0.521946	0.732689	0.789121	0.1705	0.942	0.639	0.581	0.23024			0.005	0.748	-3.74	0.246481	0.351412	-3.16		-4.05	0.047	-2.615	-0.329	0.001	0.001	8.9265	0.363953
2321	NM_000518.4:c.17C>T	HBB:c.17C>T	NM_000518.4:c.17C>T	NP_000509.1:p.(P6L)	VUS	VUS	Missense codons	11:5248235-5248235	missense_variant	0.16	0.487112	1		0.038	0	0.140699	0.624538	0.959004	-0.5246	0.51	0.521	0.401	0.19634			0.061	0.525	-10.5	0.0333951	0.22221	-2.29	2.56	-1.01	0.005	-1.427	-0.684	0.001	0.019	21.0507	0.0533624
2322	NM_000558.5:c.347C>T	HBA1:c.347C>T	NM_000558.5:c.347C>T	NP_000549.1:p.(A116V)	VUS	VUS	Missense codons	16:227328-227328	missense_variant	0.03	0.676563	1	0.073127	0	0	0.146954	0.911855	0.794321	0.2066	0.354	0.564	0.217	0.10693			0.364	0.7473	-8.37	0.105515	0.187342	-3.17		-2.46	3.514	-5.111	-0.294	0	0.001	12.4658	0.204298
2323	NM_000558.5:c.397G>A	HBA1:c.397G>A	NM_000558.5:c.397G>A	NP_000549.1:p.(V133M)	VUS	VUS	Missense codons	16:227378-227378	missense_variant	0.02	0.549168	0.997773	1.2e-05	0.99	0	0.995896	0.996839	0.930707	0.8981	0.728	0.688	0.475	0.87824			0.825	0.8673	1.96	2.03404	0.205398	-3.46		-2.55	22.8	2.17	1.172	0.705	0.926	13.6114	2.33034
2326	NM_000518.4:c.13A>C	HBB:c.13A>C	NM_000518.4:c.13A>C	NP_000509.1:p.(T5P)	VUS	VUS	Missense codons	11:5248239-5248239	missense_variant	0.01	0.487112	0.874772		0.649	0	0.908337	0.968174	0.953205	0.3381	0.415	0.515	0.512	0.35284			0.634	0.7705	-0.263	1.14965	0.154953	-2.57	3.65	-4.31	15.59	0.008	1.137	0.032	0.062	12.2772	1.65725
2327	NM_000518.4:c.10C>A	HBB:c.10C>A	NM_000518.4:c.10C>A	NP_000509.1:p.(L4M)	VUS	VUS	Missense codons	11:5248242-5248242	missense_variant	0.03	0.487112	0.967686		0.267	0	0.400809	0.966116	0.751525	0.0964	0.592	0.562	0.577	0.90798			0.393	0.6821	3.33	2.50643	0.303459	-2.4	3.245	-0.33	16.96	3.042	1.175	0.028	0.051	6.5064	3.0768
2330	NM_000518.4:c.69A>T	HBB:c.69A>T	NM_000518.4:c.69A>T	NP_000509.1:p.(E23D)	VUS	B/LB	Missense codons	11:5248183-5248183	missense_variant	0.26	0.487112	1		0.023		0.060573	0.969043	0.219378	-0.7267	0.563	0.572	0.576	0.1475			0.035	0.4081	-5.52	0.150176	0.123177	-2.6	1.225	-1.06	3.057	-1.803	-0.701	0.1	0.186	1.6627	0.147135
2331	NM_000518.4:c.106T>C	HBB:c.106T>C	NM_000518.4:c.106T>C	NP_000509.1:p.(Y36H)	VUS	B/LB	Missense codons	11:5248016-5248016	missense_variant	0.02	0.487112	1		0.924	0	0.989649	0.995645	0.832317	0.6479	0.9	0.914	0.889	0.96767			0.756	0.7565	5.1	7.65461	0.345342	-2.31	3.02	-4.54	26.9	8.702	1.311	0.979	0.985	14.1449	7.4096
2332	NM_000518.4:c.128T>G	HBB:c.128T>G	NM_000518.4:c.128T>G	NP_000509.1:p.(F43C)	VUS	P/LP	Missense codons	11:5247994-5247994	missense_variant	0	0.487112	1		1	0	0.998695	0.995196	0.988401	0.921	0.938	0.983	0.991	0.96909			0.945	0.9949	5.1	13.0732	0.56322	-7.16	4.65	-7.31	29.2	8.664	1.311	0.825	0.96	14.1449	13.709
2333	NM_000518.4:c.173A>G	HBB:c.173A>G	NM_000518.4:c.173A>G	NP_000509.1:p.(N58S)	VUS	VUS	Missense codons	11:5247949-5247949	missense_variant	0	0.487112	0.999998		0.998	0	0.993324	0.998346	0.967203	0.8696		0.701	0.921	0.94807			0.919	0.846	5.1	4.53198	0.149959	-3.16	1.955	-4.57	24	5.606	1.137	0.058	0.525	14.1449	5.0367
2334	NM_000518.4:c.356T>C	HBB:c.356T>C	NM_000518.4:c.356T>C	NP_000509.1:p.(F119S)	VUS	VUS	Missense codons	11:5246916-5246916	missense_variant	0.02	0.500041	0.999955		0.134	0	0.980543	0.995872	0.812519	0.309	0.699	0.631	0.645	0.93994			0.395	0.7966	3.52	2.10521	0.322197	-3.4	3.63	-4.57	19.55	5.404	1.311	0.352	0.55	8.9438	2.71662
2335	NM_000517.4:c.212T>G	HBA2:c.212T>G	NM_000517.4:c.212T>G	NP_000508.1:p.(V71G)	VUS	VUS	Missense codons	16:223240-223240	missense_variant	0	0.549168	0.999574	0.321575	0.878	0	1	0.974006		0.6414	0.806	0.595	0.544	0.41234			0.786	0.9259	0.661	1.34856	0.386998	-3.48	4.365	-4.75	19.26	0.354	0.172	0.002	0.016	8.487	2.18526
2336	NM_000558.5:c.259C>G	HBA1:c.259C>G	NM_000558.5:c.259C>G	NP_000549.1:p.(L87V)	VUS	VUS	Missense codons	16:227091-227091	missense_variant	0.01	0.676563	0.999912	1.7e-05	0.073	0	0.993251	0.984805	0.871513	0.7868	0.707	0.812	0.532	0.92123			0.411	0.837	3.32	2.69699	0.259054	-3.2		-2.62	21.7	2.741	0.947	0.992	0.906	12.1294	2.87099
2337	NM_000517.4:c.350A>T	HBA2:c.350A>T	NM_000517.4:c.350A>T	NP_000508.1:p.(E117V)	VUS	B/LB	Missense codons	16:223520-223520	missense_variant	0.04	0.59774	1	0.007615	0.001	0	0.815832	0.968717		0.1973	0.448	0.516	0.296	0.45511			0.349	0.7527	2.9	1.2151	0.249432	-3.15	2.55	-3.85	18.89	1.415	1.297	0.004	0.106	10.1691	1.28916
2338	NM_000517.4:c.382A>G	HBA2:c.382A>G	NM_000517.4:c.382A>G	NP_000508.1:p.(K128E)	VUS	B/LB	Missense codons	16:223552-223552	missense_variant	0	0.676563	0.999968	0	1	0	0.999619	0.998142		0.9678	0.746	0.932	0.694	0.85155			0.945	0.9291	3.11	4.57696	0.515995	-3.39	4.64	-3.68	25.1	4.491	1.297	0.969	0.367	9.3484	5.92281
2340	NM_000558.5:c.315C>G	HBA1:c.315C>G	NM_000558.5:c.315C>G	NP_000549.1:p.(C105W)	P/LP	P/LP	Missense codons	16:227296-227296	missense_variant	0	0.676563	0.995966	0.072456	0.941	0	0.999514	0.9879	0.965703	0.5988	0.803	0.643	0.593	0.90817			0.831	0.8065	1.32	2.47896	0.286958	-3.28		-9.21	23.7	2.179	1.01	1	0.97	9.2978	2.65665
2347	NM_000558.5:c.189delG	HBA1:c.189delG	NM_000558.5:c.189delG	NP_000549.1:p.(A64Pfs*4)	VUS	VUS	Frameshift	16:227020-227021	frameshift_variant						0																			23.1
2348	NM_000517.4:c.44G>T	HBA2:c.44G>T	NM_000517.4:c.44G>T	NP_000508.1:p.(W15L)	VUS	VUS	Missense codons	16:222955-222955	missense_variant	0	0.516011	0.998453	8e-06	0.653	0.04	0.998734	0.934182		0.8872	0.66	0.614	0.71	0.90645			0.674	0.8967	2.73	1.72363	0.302125	-3.73	3.375	-11.63	22.5	3.844	1.13	0.038	0.034	8.8937	2.29878
2350	NM_000517.4:c.292A>G	HBA2:c.292A>G	NM_000517.4:c.292A>G	NP_000508.1:p.(N98D)	VUS	VUS	Missense codons	16:223320-223320	missense_variant	0	0.582742	0.999963	0	0.998	0	0.998356	0.99605		0.9445	0.882	0.884	0.905	0.98061			0.919	0.8991	4.22	7.52339	0.243232	-3.31	4.365	-4.75	25	8.67	1.276	0.999	0.929	7.5143	8.8488
2351	NM_000517.4:c.65C>T	HBA2:c.65C>T	NM_000517.4:c.65C>T	NP_000508.1:p.(A22V)	VUS	VUS	Missense codons	16:222976-222976	missense_variant	0.51	0.516011	1	0.02224	0.013	0.01	0.121259	0.955324		-0.6027	0.482	0.493	0.137	0.01029			0.009	0.4654	-7.88	0.0616659	0.0543099	-3.2	1.12	-1.12	0.467	-3.518	-0.253	0	0.007	5.7678	0.0720357
2352	NM_000558.5:c.9_10insCTG	HBA1:c.9_10insCTG	NM_000558.5:c.9_10insCTG	NP_000549.1:p.(L3dup)	VUS	VUS	Inframe indels	16:226724-226724	inframe_insertion
2353	NM_000558.5:c.55G>T	HBA1:c.55G>T	NM_000558.5:c.55G>T	NP_000549.1:p.(G19C)	VUS	VUS	Missense codons	16:226770-226770	missense_variant	0.02	0.623552	1	0.002807	0.919	0.08	0.979414	0.99619	0.70163	0.4865	0.476	0.501	0.485	0.44331			0.752	0.798	4.43	1.38291	0.200782	-3.17		-4.28	22.8	-0.053	1.048	0.003	0	11.6599	1.6665
2355	NM_000517.4:c.257A>G	HBA2:c.257A>G	NM_000517.4:c.257A>G	NP_000508.1:p.(D86G)	VUS	VUS	Missense codons	16:223285-223285	missense_variant	0.04	0.676563	0.999824	0	0.532	0	0.9939	0.995598		0.8352	0.727	0.846	0.576	0.94583			0.529	0.8368	4.22	3.46203	0.30734	-3.24	3.295	-5.6	23.9	5.519	1.196	0.714	0.212	12.555	3.74699
2356	NM_000517.4:c.368A>T	HBA2:c.368A>T	NM_000517.4:c.368A>T	NP_000508.1:p.(H123L)	VUS	P/LP	Missense codons	16:223538-223538	missense_variant	0.06	0.676563	0.999997	0	0.123	0	0.998679	0.951328		0.6519	0.726	0.758	0.717	0.92869			0.333	0.7964	4.24	2.50695	0.494931	-3.07	3.24	-9.04	20.6	5.512	1.297	0.023	0.493	9.0222	2.79435
2357	NM_000558.5:c.289G>C	HBA1:c.289G>C	NM_000558.5:c.289G>C	NP_000549.1:p.(V97L)	VUS	VUS	Missense codons	16:227121-227121	missense_variant	0.01	0.676563	0.675814	2.1e-05	0.345	0	0.915903	0.984807	0.940956	0.9687	0.771	0.703	0.527	0.8964			0.515	0.8257	3.33	2.86906	0.279596	-3.16		-2.4	22	4.293	1.153	0.998	0.999	12.3961	3.01695
2358	NM_000558.5:c.215C>T	HBA1:c.215C>T	NM_000558.5:c.215C>T	NP_000549.1:p.(A72V)	VUS	VUS	Missense codons	16:227047-227047	missense_variant	0.1	0.676563	1	0.000632	0.003	0	0.149174	0.715791	0.758824	0.175	0.415	0.551	0.435	0.05675			0.286	0.7416	-8.62	0.000906102	0.150886	-3.22		-1.74	0.001	-5.256	-5.859	0	0	12.0704	0.00194152
2359	NM_000518.4:c.11T>C	HBB:c.11T>C	NM_000518.4:c.11T>C	NP_000509.1:p.(L4P)	VUS	VUS	Missense codons	11:5248241-5248241	missense_variant	0	0.487112	0.999997		0.203	0.03	0.781869	0.997488	0.756924	0.5435	0.572	0.651	0.551	0.93807			0.464	0.7004	5.24	3.35846	0.349645	-2.43	4.29	-3.73	21.3	4.729	1.311	0.034	0.059	11.0579	3.73537
2360	NM_000517.4:c.337C>T	HBA2:c.337C>T	NM_000517.4:c.337C>T	NP_000508.1:p.(H113Y)	VUS	VUS	Missense codons	16:223507-223507	missense_variant	0.09	0.59774	1	0.001516	0.082	0	0.912964	0.954433		-0.0289	0.821	0.581	0.299	0.17142			0.302	0.702	2.15	0.994394	0.226772	-3.17	2.835	-5.4	11.36	0.15	1.002	0.052	0.147	11.6388	1.2201
2361	NM_000517.4:c.8T>C	HBA2:c.8T>C	NM_000517.4:c.8T>C	NP_000508.1:p.(L3P)	VUS	P/LP	Missense codons	16:222919-222919	missense_variant	0	0.516011	1	0.000145	0.574	0.02	0.997018	0.990895		0.9996	0.496	0.832	0.615	0.96115			0.641	0.9106	3.78	3.53505	0.41031	-3.96	4.04	-6.3	23.8	3.837	1.099	0.947	0.816	11.7505	4.1664
2362	NM_000517.4:c.191C>T	HBA2:c.191C>T	NM_000517.4:c.191C>T	NP_000508.1:p.(A64V)	VUS	VUS	Missense codons	16:223219-223219	missense_variant	0.85	0.549168	0.999997	0.006698	0.03	0	0.674804	0.994251		-0.4531	0.479	0.549	0.281	0.05192			0.002	0.4902	0.849	0.787094	0.113744	-2.94	1.775	-1.18	8.462	0.471	0.991	0.91	0.841	8.4298	0.666746
2364	NM_000518.4:c.433A>T	HBB:c.433A>T	NM_000518.4:c.433A>T	NP_000509.1:p.(K145*)	VUS	P/LP	Stop gained	11:5246839-5246839	stop_gained		0.487112	0.999998					0.991732					0.62	0.89099					3.55	4.00057	0.539151				42	1.233	1.137	0.997	0.987	6.2107	5.20423
2365	NM_000558.5:c.46G>T	HBA1:c.46G>T	NM_000558.5:c.46G>T	NP_000549.1:p.(G16C)	VUS	VUS	Missense codons	16:226761-226761	missense_variant	0.02	0.623552	1	0.74704	0.565	0.03	0.239579	0.991207	0.762524	0.3068	0.627	0.535	0.356	0.47547			0.576	0.7766	-3.05	0.438593	0.1387	-3.28		-3.22	23.2	-0.533	0.1	0.011	0.001	7.1278	0.593261
2366	NM_000517.4:c.337C>A	HBA2:c.337C>A	NM_000517.4:c.337C>A	NP_000508.1:p.(H113N)	VUS	VUS	Missense codons	16:223507-223507	missense_variant	0.09	0.59774	1	0.001516	0.044	0	0.671445	0.855479		0.0651	0.816	0.45	0.287	0.15351			0.299	0.731	2.15	0.756539	0.145422	-3.19	2.575	-6.11	11.45	0.15	1.002	0.052	0.147	11.6388	0.781942
2367	NM_000517.4:c.265G>A	HBA2:c.265G>A	NM_000517.4:c.265G>A	NP_000508.1:p.(A89T)	VUS	P/LP	Missense codons	16:223293-223293	missense_variant	0.02	0.676563	0.999949	0	0.909	0	0.998733	0.997902		0.8355	0.939	0.824	0.548	0.91598			0.745	0.8766	3.26	3.51767	0.36475	-3.25	3.92	-3.63	23.3	7.426	1.073	0.768	0.231	7.8223	4.62723
2368	NM_000517.4:c.71A>C	HBA2:c.71A>C	NM_000517.4:c.71A>C	NP_000508.1:p.(E24A)	VUS	VUS	Missense codons	16:222982-222982	missense_variant	0.71	0.516011	0.999999	0.081751	0.007	0.08	0.0643453	0.905982		-0.4501	0.847	0.508	0.353	0.13318			0.002	0.4969	1.41	0.417923	0.11537	-3.15	1.13	-1.73	9.675	0.525	0.196	0.001	0.023	5.7722	0.348401
2369	NM_000517.4:c.346_348delGCC	HBA2:c.346_348delGCC	NM_000517.4:c.346_348delGCC	NP_000508.1:p.(A116del)	VUS	VUS	Inframe indels	16:223515-223518	inframe_deletion						0
2370	NM_000517.4:c.300G>C	HBA2:c.300G>C	NM_000517.4:c.300G>C	NP_000508.1:p.(K100N)	VUS	VUS	Splice region variant; Missense codons	16:223328-223328	missense_variant,splice_region_variant	0	0.582742	1	0.000107	0.218	0	0.989148	0.995983		0.5883	0.941	0.727	0.713	0.94256	0.999983	0.956	0.466	0.7777	3.25	2.80076	0.192533	-3.25	3.685	-4.38	26.7	1.364	1.144	0.999	0.868	7.5952	2.78326	3.54	36.8865
2371	NM_000517.4:c.11C>G	HBA2:c.11C>G	NM_000517.4:c.11C>G	NP_000508.1:p.(S4C)	VUS	VUS	Missense codons	16:222922-222922	missense_variant	0	0.516011	0.987712	0.099858	0.776	0	0.991062	0.991009		1.0331	0.48	0.726	0.509	0.74496			0.734	0.8977	3.78	2.94864	0.248002	-3.56	3.79	-3.55	23.6	1.978	0.991	0.759	0.643	14.6725	3.86654
2372	NM_000517.4:c.259C>G	HBA2:c.259C>G	NM_000517.4:c.259C>G	NP_000508.1:p.(L87V)	VUS	P/LP	Missense codons	16:223287-223287	missense_variant	0.01	0.676563	0.999967	1.7e-05	0.073	0	0.856019	0.976415		0.4512	0.707	0.751	0.415	0.91327			0.411	0.7774	3.23	2.06248	0.259427	-3.2	3.135	-2.62	19.85	2.836	0.938	0.791	0.258	11.7821	2.0987
2373	NM_000517.4:c.112C>T	HBA2:c.112C>T	NM_000517.4:c.112C>T	NP_000508.1:p.(P38S)	VUS	VUS	Missense codons	16:223140-223140	missense_variant	0.01	0.516011	0.999999	0	0.574	0	0.998326	0.997877		1.0828	0.89	0.923	0.673	0.98834			0.603	0.9724	4.15	7.07028	0.518964	-5.46	4.185	-7.47	25.1	5.641	0.991	0.991	0.998	11.561	8.12215
2374	NM_000518.4:c.49G>T	HBB:c.49G>T	NM_000518.4:c.49G>T	NP_000509.1:p.(G17C)	VUS	VUS	Missense codons	11:5248203-5248203	missense_variant	0	0.487112	0.914905		0.351	0.16	0.683047	0.996141	0.767723	-0.0171	0.712	0.594	0.532	0.19296			0.555	0.6253	-0.213	1.33625	0.189949	-2.05	3.885	-4.01	19.03	-0.636	0.125	0.525	0.548	0.3943	1.5121
2375	NM_000517.4:c.289G>A	HBA2:c.289G>A	NM_000517.4:c.289G>A	NP_000508.1:p.(V97I)	VUS	VUS	Missense codons	16:223317-223317	missense_variant	0.04	0.582742	0.99393	0.000153	0.427	0	0.942272	0.997072		0.3894	0.781	0.663	0.421	0.91665			0.488	0.7315	2.19	2.83365	0.1824	-3.15	2.945	-0.85	22.6	2.979	1.144	0.996	0.938	7.9008	3.00878
2376	NM_000517.4:c.140T>C	HBA2:c.140T>C	NM_000517.4:c.140T>C	NP_000508.1:p.(F47S)	VUS	P/LP	Missense codons	16:223168-223168	missense_variant	0	0.516011	0.996032	0.000249	0.973	0.03	0.979784	0.997361		1.063	0.778	0.875	0.722	0.96114			0.859	0.9286	4.15	5.13831	0.474281	-3.58	4.06	-6.73	23.9	4.842	1.099	0.984	0.996	12.4349	6.46052
2377	NM_000558.5:c.339C>A	HBA1:c.339C>A	NM_000558.5:c.339C>A	NP_000549.1:p.(H113Q)	VUS	VUS	Missense codons	16:227320-227320	missense_variant	0.02	0.676563	0.999998	0.00035	0.649	0	0.976746	0.968259	0.766923	0.2048	0.825	0.558	0.277	0.503			0.611	0.764	2.45	1.2514	0.291906	-3.19		-6.92	18.75	1.803	1.012	0.011	0.01	9.3637	1.51125
2380	NM_000558.5:c.44G>T	HBA1:c.44G>T	NM_000558.5:c.44G>T	NP_000549.1:p.(W15L)	VUS	VUS	Missense codons	16:226759-226759	missense_variant	0	0.623552	0.999642	6.4e-05	0.653	0.04	0.998779	0.955889	0.832317	0.9277	0.66	0.719	0.821	0.94034			0.674	0.8791	4.45	2.16403	0.46664	-3.73		-11.63	23.5	3.195	1.048	0.024	0.005	10.6213	2.47212
2381	NM_000558.5:c.98T>A	HBA1:c.98T>A	NM_000558.5:c.98T>A	NP_000549.1:p.(M33K)	VUS	B/LB	Splice region variant; Missense codons	16:226930-226930	missense_variant,splice_region_variant	0	0.623552	1	1e-06	0.763	0.53	0.985422	0.963192	0.916408	0.574	0.921	0.835	0.927	0.92077			0.728	0.822	0.773	3.03827	0.465384	-3.3		-3.8	22.9	1.309	0.18	0.405	0.908	7.6679	4.78029	-0.049	-0.36641
2382	NM_000518.4:c.24G>T	HBB:c.24G>T	NM_000518.4:c.24G>T	NP_000509.1:p.(E8D)	VUS	VUS	Missense codons	11:5248228-5248228	missense_variant	0.04	0.487112	0.99988		0.127	0	0.436164	0.988853	0.851715	0.0318	0.789	0.658	0.678	0.9504			0.359	0.62	3.37	1.4807	0.387253	-3.04	1.93	-2.19	19.26	2.206	0.129	0.018	0.003	10.9422	1.3339
2383	NM_000517.4:c.22A>C	HBA2:c.22A>C	NM_000517.4:c.22A>C	NP_000508.1:p.(K8Q)	VUS	VUS	Missense codons	16:222933-222933	missense_variant	0.07	0.516011	0.999997	0	0.872	0	0.990571	0.990446		0.9213	0.899	0.815	0.637	0.97416			0.658	0.871	3.78	3.25762	0.291043	-3.34	3.57	-2.71	22.7	4.644	1.266	0.127	0.021	11.7505	4.12802
2384	NM_000517.4:c.23A>C	HBA2:c.23A>C	NM_000517.4:c.23A>C	NP_000508.1:p.(K8T)	VUS	VUS	Missense codons	16:222934-222934	missense_variant	0.01	0.516011	0.999994	0	0.977	0	0.983222	0.996062		0.9315	0.901	0.827	0.7	0.89489			0.825	0.8927	3.78	3.41792	0.289226	-3.33	3.995	-4.85	23.3	5.489	1.262	0.123	0.018	8.3501	4.54554
2385	NM_000558.5:c.128A>C	HBA1:c.128A>C	NM_000558.5:c.128A>C	NP_000549.1:p.(Y43S)	VUS	VUS	Missense codons	16:226960-226960	missense_variant	0.02	0.623552	1	0	1	0.02	0.99812	0.990883	0.873313	0.8291	0.844	0.902	0.8	0.90352			0.883	0.836	4.31	3.76036	0.413255	-3.37		-8.68	26.7	1.964	1.285	0.999	0.996	11.5007	3.62326
2386	NM_000558.5:c.40G>A	HBA1:c.40G>A	NM_000558.5:c.40G>A	NP_000549.1:p.(A14T)	VUS	B/LB	Missense codons	16:226755-226755	missense_variant	0.15	0.623552	1	0.764349	0.006	0.01	0.0554691	0.968922	0.864413	-0.2678	0.378	0.326	0.111	0.18981			0.241	0.6046	-4.12	0.417436	-0.0756326	-2.99		-0.67	8.983	-4.261	-0.612	0.001	0.002	6.3467	0.593994
2388	NM_000517.4:c.271A>C	HBA2:c.271A>C	NM_000517.4:c.271A>C	NP_000508.1:p.(K91Q)	VUS	VUS	Missense codons	16:223299-223299	missense_variant	0.17	0.676563	0.999989	4e-05	0.057	0	0.760532	0.957816		0.2851	0.904	0.65	0.454	0.89886			0.062	0.6934	4.22	1.86682	0.300398	-3.23	2.77	-2	18.89	2.544	1.196	0.867	0.311	12.555	1.74937
2389	NM_000518.4:c.404T>G	HBB:c.404T>G	NM_000518.4:c.404T>G	NP_000509.1:p.(V135G)	VUS	VUS	Missense codons	11:5246868-5246868	missense_variant	0	0.500041	0.999983		0.684	0	0.996536	0.99369	0.928207	0.5463	0.67	0.764	0.548	0.89782			0.689	0.8315	1.06	3.01505	0.306958	-3.34	3.91	-4.38	24.1	2.416	1.311	1	0.999	4.2489	3.78685
2390	NM_000517.4:c.270C>G	HBA2:c.270C>G	NM_000517.4:c.270C>G	NP_000508.1:p.(H90Q)	VUS	VUS	Missense codons	16:223298-223298	missense_variant	0.3	0.676563	0.964735	0.000748	0.013	0	0.520221	0.708927		-0.1475	0.804	0.578	0.478	0.85223			0.029	0.5872	3.26	1.15226	0.253445	-3.03	2.065	-4.71	14.97	0.71	0.938	0.856	0.297	10.872	1.01059
2391	NM_000518.4:c.241A>G	HBB:c.241A>G	NM_000518.4:c.241A>G	NP_000509.1:p.(N81D)	VUS	VUS	Missense codons	11:5247881-5247881	missense_variant	0.51	0.487112	0.667468		0.015	0	0.0614782	0.95995	0.755224	-0.4111	0.686	0.431	0.432	0.69019			0.009	0.4978	-0.0512	0.869929	0.069123	-3.11	0.545	-1.28	12.96	0.386	0.204	0.99	0.777	9.2322	0.596205
2393	NM_000518.4:c.119delA	HBB:c.119delA	NM_000518.4:c.119delA	NP_000509.1:p.(Q40Rfs*22)	P/LP	P/LP	Frameshift	11:5248002-5248003	frameshift_variant						0
2399	NM_000518.4:c.301C>A	HBB:c.301C>A	NM_000518.4:c.301C>A	NP_000509.1:p.(P101T)	VUS	VUS	Missense codons	11:5247821-5247821	missense_variant	0.01	0.487112	1		0.999	0	0.998172	0.996786	0.933207	1.0613	0.95	0.957	0.952	0.98002			0.896	0.932	5.24	13.5681	0.525235	-3.43	3.815	-6.56	26.4	9.318	1.175	1	0.784	17.9125	13.1578
2400	NM_000518.4:c.22G>C	HBB:c.22G>C	NM_000518.4:c.22G>C	NP_000509.1:p.(E8Q)	VUS	VUS	Missense codons	11:5248230-5248230	missense_variant	0.01	0.487112	0.999999		0.634		0.943151	0.997263	0.918408	0.8352	0.592	0.7	0.866	0.98216			0.628	0.8188	5.24	5.61553	0.439135	-3.06	3.625	-2.44	23.8	5.337	1.025	0.014	0.003	17.9125	6.03511
2401	NM_000518.4:c.218G>C	HBB:c.218G>C	NM_000518.4:c.218G>C	NP_000509.1:p.(S73T)	VUS	VUS	Missense codons	11:5247904-5247904	missense_variant	0.08	0.487112	1		0.054		0.0969704	0.953371	0.766023	-0.1489	0.363	0.514	0.826	0.3903			0.303	0.63	3.94	0.951777	0.269918	-3.15	1.33	-1.81	13.49	1.407	0.138	0.369	0.317	7.5452	0.836908
2402	NM_000558.5:c.95G>C	HBA1:c.95G>C	NM_000558.5:c.95G>C	NP_000549.1:p.(R32T)	VUS	VUS	Splice region variant; Missense codons	16:226810-226810	missense_variant,splice_region_variant	0	0.623552	1	0	0.999	0.51	0.868786	0.972586	0.985801	0.9503	0.923	0.933	0.825	0.98885	0.999991	0.998	0.935	0.8675	4.45	12.2293	0.497794	-3.38		-5.76	34	8.531	1.052	0.945	0.793	16.4459	15.37	3.731	44.3691
2403	NM_000518.4:c.81G>Y	HBB:c.81G>Y	NM_000518.4:c.81G>Y	NP_000509.1:p.(E27D)	VUS	VUS	Missense codons	11:5248170-5248171	coding_sequence_variant																							2.44
2404	NM_000518.4:c.317T>C	HBB:c.317T>C	NM_000518.4:c.317T>C	NP_000509.1:p.(L106P)	VUS	VUS	Splice region variant; Missense codons	11:5246955-5246955	missense_variant,splice_region_variant	0	0.487112	1		0.999	0.01	0.997321	0.998967	0.830817	1.0281	0.87	0.946	0.94	0.96965	0.171372	0.39	0.935	0.9238	4.68	8.5368	0.513616	-3.55	4.38	-5.39	32	6.413	1.311	0.998	0.979	8.6484	9.75265	0.131	1.14651
2405	NM_000518.4:c.232C>A	HBB:c.232C>A	NM_000518.4:c.232C>A	NP_000509.1:p.(H78N)	VUS	VUS	Missense codons	11:5247890-5247890	missense_variant	1	0.487112	0.989838		0.136	0	0.072638	0.653434	0.80282	-0.7159	0.669	0.498	0.47	0.13381			0.011	0.5047	1.89	0.606681	0.0614791	-3.09	0.36	-1.07	5.707	0.993	0.185	0.455	0.377	13.7578	0.417575
2406	NM_000518.4:c.313A>G	HBB:c.313A>G	NM_000518.4:c.313A>G	NP_000509.1:p.(R105G)	VUS	VUS	Splice region variant; Missense codons	11:5247809-5247809	missense_variant,splice_region_variant	0	0.487112	0.999921		0.945	0	0.979293	0.997691	0.944805	0.8878	0.672	0.84	0.688	0.93021	0.00636853	0.088	0.834	0.8725	4.08	3.39578	0.364731	-3.12	3.53	-4.78	25	2.4	1.137	0.924	0.564	11.4427	3.73066	1.319	14.2548
2407	NM_000518.4:c.149_167delinsAGCT	HBB:c.149_167delinsAGCT	NM_000518.4:c.149_167delinsAGCT	NP_000509.1:p.(S50*)	P/LP	P/LP	Frameshift	11:5247954-5247972	protein_altering_variant
2408	NM_000558.5:c.380A>C	HBA1:c.380A>C	NM_000558.5:c.380A>C	NP_000549.1:p.(D127A)	VUS	VUS	Missense codons	16:227361-227361	missense_variant	0	0.549168	0.999996	0	0.986	0	0.999292	0.989697	0.966803	0.6851	0.904	0.875	0.706	0.89549			0.879	0.8242	3.06	2.59216	0.467022	-3.19		-7.4	23.9	5.276	1.308	0.9	0.85	10.1827	2.8049
2409	NM_000517.4:c.178G>A	HBA2:c.178G>A	NM_000517.4:c.178G>A	NP_000508.1:p.(G60S)	VUS	VUS	Missense codons	16:223206-223206	missense_variant	0.01	0.549168	0.999998	0	0.992	0	0.998142	0.99816		1.0804	0.919	0.891	0.598	0.92798			0.853	0.9205	4.01	5.4207	0.357632	-3.38	4.125	-5.43	23.6	7.537	1.135	0.811	0.746	15.1882	7.01494
2410	NM_000518.4:c.358G>C	HBB:c.358G>C	NM_000518.4:c.358G>C	NP_000509.1:p.(G120R)	VUS	VUS	Missense codons	11:5246914-5246914	missense_variant	0.01	0.500041	0.521078		0.112		0.959713	0.99652	0.890411	0.6533	0.658	0.598	0.436	0.38209			0.415	0.7439	3.75	1.31913	0.315074	-3.66	2.65	-4.94	18.48	1.906	0.122	0.125	0.452	12.6753	1.6474
2411	NM_000518.4:c.314G>T	HBB:c.314G>T	NM_000518.4:c.314G>T	NP_000509.1:p.(R105M)	VUS	VUS	Splice region variant; Missense codons	11:5247808-5247808	missense_variant,splice_region_variant	0.02	0.487112	0.996614		0.957	0	0.766177	0.923937	0.59804	0.6714	0.69	0.722	0.686	0.80627	5.58521e-05	0.092	0.784	0.8564	-2.27	0.997156	0.259011	-3.18	3.325	-3.72	18.27	-0.21	-2.17	0.79	0.492	8.6951	1.15224	-0.873	-9.43478
2412	NM_000518.4:c.301C>T	HBB:c.301C>T	NM_000518.4:c.301C>T	NP_000509.1:p.(P101S)	VUS	P/LP	Missense codons	11:5247821-5247821	missense_variant	0.03	0.487112	1		0.99	0	0.997451	0.999137	0.891311	1.056	0.942	0.941	0.895	0.97753			0.806	0.9269	5.24	14.4479	0.506209	-3.39	4.27	-6.52	27	9.318	1.175	1	0.784	17.9125	14.1671
2413	NM_000518.4:c.295G>C	HBB:c.295G>C	NM_000518.4:c.295G>C	NP_000509.1:p.(V99L)	VUS	VUS	Missense codons	11:5247827-5247827	missense_variant	0.01	0.487112	1		0.764		0.991088	0.998148	0.905509	1.0775	0.932	0.887	0.876	0.97402			0.689	0.9422	5.24	9.17256	0.534948	-4.07	3.89	-2.55	25.6	7.199	1.025	0.997	0.799	17.9125	9.04592
2414	NM_000558.5:c.377T>C	HBA1:c.377T>C	NM_000558.5:c.377T>C	NP_000549.1:p.(L126P)	P/LP	VUS	Missense codons	16:227358-227358	missense_variant	0	0.549168	1	0.002846	0.995	0	0.999251	0.994329	0.730627	0.4007	0.973	0.791	0.897	0.7981			0.902	0.7848	0.248	1.30875	0.464431	-3.24		-5.01	22.5	0.996	1.135	0.57	0.763	6.8598	1.54692
2416	NM_000558.5:c.299A>T	HBA1:c.299A>T	NM_000558.5:c.299A>T	NP_000549.1:p.(K100M)	VUS	P/LP	Splice region variant; Missense codons	16:227131-227131	missense_variant,splice_region_variant	0	0.676563	1	2e-06	0.329	0	0.986427	0.948852	0.762524	0.3555	0.836	0.838	0.646	0.93831	0.204098	0.56	0.547	0.7698	1.85	4.99742	0.269136	-3.31		-5.24	23.3	0.543	0.304	0.998	0.983	4.4618	7.25903	1.325	13.8064
2420	NM_000517.4:c.313T>C	HBA2:c.313T>C	NM_000517.4:c.313T>C	NP_000508.1:p.(C105R)	P/LP	P/LP	Missense codons	16:223483-223483	missense_variant	0	0.59774	0.999996	0.278793	0.75	0	0.999179	0.994325		0.7288	0.884	0.713	0.861	0.34388			0.72	0.8644	1.74	2.47449	0.458565	-3.26	4.33	-9.76	25.2	0.598	1.111	0.998	0.986	6.6145	3.33137
2422	NM_000518.4:c.235C>G	HBB:c.235C>G	NM_000518.4:c.235C>G	NP_000509.1:p.(L79V)	VUS	VUS	Missense codons	11:5247887-5247887	missense_variant	0.04	0.487112	0.872733		0.502		0.519521	0.987344	0.840916	0.6956	0.674	0.855	0.517	0.81938			0.516	0.8388	2.16	1.72679	0.221043	-3.61	2.98	-2.26	21.6	0.85	0.244	0.849	0.563	2.7821	1.909
2424	NM_000517.4:c.299A>G	HBA2:c.299A>G	NM_000517.4:c.299A>G	NP_000508.1:p.(K100R)	VUS	P/LP	Splice region variant; Missense codons	16:223327-223327	missense_variant,splice_region_variant	0.07	0.582742	1	0.000107	0.577	0	0.969945	0.991409		0.2046	0.839	0.892	0.671	0.94203	0.421809	0.514	0.517	0.6933	3.12	2.73364	0.272583	-3.24	2.205	-2.55	23.8	5.702	1.276	1	0.884	7.3317	2.75364	1.851	19.2873
2429	NM_000558.5:c.188T>C	HBA1:c.188T>C	NM_000558.5:c.188T>C	NP_000549.1:p.(V63A)	VUS	VUS	Missense codons	16:227020-227020	missense_variant	0	0.676563	0.999835	6.6e-05	0.979	0.01	0.995336	0.995736	0.821218	0.9212	0.925	0.884	0.876	0.91512			0.867	0.8851	4.31	3.15003	0.541516	-3.86		-3.86	24.4	5.534	1.117	0.914	0.905	8.5449	3.26049
2432	NM_000518.4:c.305A>T	HBB:c.305A>T	NM_000518.4:c.305A>T	NP_000509.1:p.(E102V)	VUS	VUS	Missense codons	11:5247817-5247817	missense_variant	0.02	0.487112	0.999921		0.978		0.990061	0.99112	0.862314	0.8659	0.763	0.874	0.599	0.94499			0.803	0.8446	5.24	5.67274	0.28139	-3.28	2.14	-4.92	28	3.68	1.137	0.998	0.735	14.3909	5.68322
2433	NM_000517.4:c.40_45delGCCTGG	HBA2:c.40_45delGCCTGG	NM_000517.4:c.40_45delGCCTGG	NP_000508.1:p.(A14_W15del)	VUS	P/LP	Inframe indels	16:222950-222956	inframe_deletion
2434	NM_000518.4:c.337T>G	HBB:c.337T>G	NM_000518.4:c.337T>G	NP_000509.1:p.(C113G)	VUS	VUS	Missense codons	11:5246935-5246935	missense_variant	0	0.487112	1		0.325	0	0.2643	0.786886	0.905309	-0.0265	0.556	0.623	0.602	0.04272			0.546	0.6668	-9.37	0.0468037	0.185234	-3.23	2.33	-2.2	2.379	-1.607	-1.79	0.234	0.835	3.7716	0.069969
2436	NM_000517.4:c.323delT	HBA2:c.323delT	NM_000517.4:c.323delT	NP_000508.1:p.(V108Gfs*26)	VUS	P/LP	Frameshift	16:223492-223493	frameshift_variant						0.01																			32
2438	NM_000517.4:c.69_77delCGAGTATGG	HBA2:c.69_77delCGAGTATGG	NM_000517.4:c.69_77delCGAGTATGG	NP_000508.1:p.(E24_G26del)	VUS	P/LP	Inframe indels	16:222979-222988	inframe_deletion
2441	NM_000518.4:c.282T>G	HBB:c.282T>G	NM_000518.4:c.282T>G	NP_000509.1:p.(C94W)	VUS	VUS	Missense codons	11:5247840-5247840	missense_variant	0	0.487112	0.999999		1	0	0.991284	0.994113	0.835616	0.924	0.913	0.828	0.924	0.8827			0.945	0.8751	5.24	6.31285	0.447189	-3.14	3.99	-9.6	28.4	0.281	1.311	1	0.971	9.5361	6.85853
2442	NM_000518.4:c.281G>C	HBB:c.281G>C	NM_000518.4:c.281G>C	NP_000509.1:p.(C94S)	VUS	VUS	Missense codons	11:5247841-5247841	missense_variant	0.42	0.487112	0.987589		0.928		0.994206	0.994577	0.833317	0.6458	0.766	0.563	0.532	0.7489			0.39	0.7774	5.24	5.79466	0.21295	-3.05	1.95	-8.42	23.5	2.655	1.025	1	0.973	13.6209	5.45035
2443	NM_000518.4:c.244C>T	HBB:c.244C>T	NM_000518.4:c.244C>T	NP_000509.1:p.(L82F)	VUS	VUS	Missense codons	11:5247878-5247878	missense_variant	0.03	0.487112	0.968104		0.991	0	0.993594	0.999048	0.887511	1.0277	0.736	0.791	0.851	0.88643			0.808	0.9108	5.1	6.74904	0.426118	-3.34	4.335	-3.1	25.2	2.339	1.175	1	0.93	11.2938	7.86612
2445	NM_000518.4:c.241_243delAAC	HBB:c.241_243delAAC	NM_000518.4:c.241_243delAAC	NP_000509.1:p.(N81del)	VUS	P/LP	Inframe indels	11:5247878-5247881	inframe_deletion						0
2446	NM_000517.4:c.256G>C	HBA2:c.256G>C	NM_000517.4:c.256G>C	NP_000508.1:p.(D86H)	VUS	VUS	Missense codons	16:223284-223284	missense_variant	0.02	0.676563	0.999802	0	0.991	0	0.99715	0.992723		0.7684	0.76	0.793	0.612	0.93896			0.827	0.8378	4.22	3.94482	0.301317	-3.23	2.89	-5.2	23.9	3.046	1.073	0.615	0.166	6.7449	4.61489
2451	NM_000558.5:c.96-2A>G	HBA1:c.96-2A>G	NM_000558.5:c.96-2A>G	NP_000549.1:p.?	VUS	P/LP	Splice acceptor	16:226926-226926	splice_acceptor_variant						1									0.999866	0.894									32							7.955	59.4855
2452	NM_000518.4:c.76G>A	HBB:c.76G>A	NM_000518.4:c.76G>A	NP_000509.1:p.(G26S)	VUS	VUS	Missense codons	11:5248176-5248176	missense_variant	0.11	0.487112	0.910486		0.882	0.02	0.8842	0.998977	0.904909	0.2337	0.743	0.53	0.521	0.63982			0.616	0.7621	5.24	4.40869	0.1799	-2.57	1.995	-2.53	25.4	2.976	1.025	0.99	0.94	13.6209	4.5972
2454	NM_000518.4:c.260C>T	HBB:c.260C>T	NM_000518.4:c.260C>T	NP_000509.1:p.(A87V)	VUS	VUS	Missense codons	11:5247862-5247862	missense_variant	0	0.487112	0.998607		0.766	0	0.965293	0.997579	0.810819	0.977	0.698	0.769	0.637	0.96972			0.728	0.9131	5.24	5.6689	0.318825	-3.29	3.805	-3.47	24.9	7.371	1.175	0.739	0.622	17.9125	5.72779
2455	NM_000558.5:c.194A>C	HBA1:c.194A>C	NM_000558.5:c.194A>C	NP_000549.1:p.(D65A)	VUS	VUS	Missense codons	16:227026-227026	missense_variant	0.89	0.676563	1	0.093574	0.011	0	0.106466	0.716416	0.667533	-0.2707	0.736	0.413	0.406	0.0652			0.001	0.6427	1.92	0.780181	0.107805	-3.01		-2.52	7.85	-0.418	1.286	0.195	0.526	7.2082	0.920886
2456	NM_000518.4:c.191A>T	HBB:c.191A>T	NM_000518.4:c.191A>T	NP_000509.1:p.(H64L)	VUS	VUS	Missense codons	11:5247931-5247931	missense_variant	0	0.487112	1		0.805		0.999335	0.975036	0.835216	1.0924	0.913	0.966	0.949	0.97806			0.748	0.9497	5.1	8.2921	0.536544	-4.39	3.925	-10.38	26	7.368	1.137	0.997	0.775	14.1449	8.77217
2457	NM_000517.4:c.371C>T	HBA2:c.371C>T	NM_000517.4:c.371C>T	NP_000508.1:p.(A124V)	VUS	VUS	Missense codons	16:223541-223541	missense_variant	0.33	0.676563	0.991831	0.002068	0.012	0	0.667286	0.997628		0.5258	0.748	0.661	0.34	0.08264			0.025	0.744	4.24	1.76305	0.255282	-3.28	2.25	-2.59	22	2.107	1.015	0.025	0.458	9.5197	1.77074
2458	NM_000517.4:c.154G>A	HBA2:c.154G>A	NM_000517.4:c.154G>A	NP_000508.1:p.(G52S)	VUS	B/LB	Missense codons	16:223182-223182	missense_variant	0.03	0.516011	0.966685	0.000523	0.383	0.01	0.920367	0.994267		0.5807	0.754	0.673	0.436	0.61447			0.487	0.7408	4.15	3.44723	0.0463309	-3.21	2.285	-4.94	21.7	2.083	1.135	0.854	0.733	9.3887	3.61443
2460	NM_000517.4:c.2T>G	HBA2:c.2T>G	NM_000517.4:c.2T>G	NP_000508.1:p.(M1?)	VUS	P/LP	Initiation codon	16:222913-222913	start_lost	0	0.516011	1	4e-06	0.999	0	0.994999	0.967962		0.8103	0.992	0.89	0.945	0.94064			0.935	0.8601	2.57	3.25909	0.60412	-3.21		-3.56	23.7	2.033	1.099	0.99	0.821	8.158	3.8269
2461	NM_000518.4:c.127T>A	HBB:c.127T>A	NM_000518.4:c.127T>A	NP_000509.1:p.(F43I)	P/LP	P/LP	Missense codons	11:5247995-5247995	missense_variant	0	0.487112	1		0.999		0.996988	0.99237	0.985741	0.921	0.945	0.977	0.946	0.96806			0.935	0.9949	5.1	13.3423	0.563378	-7.15	4.65	-5.48	28.2	8.664	1.311	0.94	0.977	14.1449	13.8589
2462	NM_000518.4:c.216delT	HBB:c.216delT	NM_000518.4:c.216delT	NP_000509.1:p.(F72Lfs*18)	P/LP	P/LP	Frameshift	11:5247905-5247906	frameshift_variant						0																			16.79
2463	NC_000011.9:g.5246595C>G	HBB:c.*233G>C	NM_000518.4:c.*233G>C		P/LP	P/LP	Downstream transcript variant	11:5246595-5246595	downstream_gene_variant																									1.348
2464	NM_000518.4:c.48G>Y	HBB:c.48G>Y	NM_000518.4:c.48G>Y	NP_000509.1:p.(W16C)	VUS	VUS	Missense codons	11:5248203-5248204	coding_sequence_variant																							4.2
2465	NM_000517.4:c.60delG	HBA2:c.60delG	NM_000517.4:c.60delG	NP_000508.1:p.(H21Tfs*29)	VUS	P/LP	Frameshift	16:222970-222971	frameshift_variant						0.01																			14.32
2466	NM_000517.4:c.298A>C	HBA2:c.298A>C	NM_000517.4:c.298A>C	NP_000508.1:p.(K100Q)	VUS	VUS	Splice region variant; Missense codons	16:223326-223326	missense_variant,splice_region_variant	0.16	0.582742	1	0.000107	0.077	0	0.945984	0.97187		0.263	0.921	0.831	0.541	0.98671	0.0391157	0.198	0.065	0.688	4.22	2.96603	0.295225	-3.25	3.17	-3.07	22	4.728	0.206	0.999	0.893	11.1148	2.61026	-0.005	-0.0520996
2467	NM_000558.5:c.298A>T	HBA1:c.298A>T	NM_000558.5:c.298A>T	NP_000549.1:p.(K100*)	VUS	P/LP	Splice region variant; Stop gained	16:227130-227130	stop_gained,splice_region_variant		0.676563	1	2e-06		0		0.985513					0.895	0.93662	0.00156463	0.324			1.85	3.57426	0.567668				36	3.604	1.286	1	0.989	4.4618	4.82113	1.635	17.0366
2468	NM_000558.5:c.134_135insC	HBA1:c.134_135insC	NM_000558.5:c.134_135insC	NP_000549.1:p.(H46Afs*12)	VUS	P/LP	Frameshift	16:226966-226966	frameshift_variant						0.02
2469	NM_000517.4:c.22A>T	HBA2:c.22A>T	NM_000517.4:c.22A>T	NP_000508.1:p.(K8*)	VUS	P/LP	Stop gained	16:222933-222933	stop_gained		0.516011	1	0		0		0.992264					0.763	0.98123					3.78	3.40916	0.60412				34	4.644	1.266	0.127	0.021	11.7505	4.86073
2470	NM_000517.4:c.274C>A	HBA2:c.274C>A	NM_000517.4:c.274C>A	NP_000508.1:p.(L92I)	VUS	P/LP	Missense codons	16:223302-223302	missense_variant	0	0.676563	0.999389	1e-06	0.984	0	0.989288	0.992197		0.8761	0.679	0.776	0.529	0.93547			0.875	0.8901	3.26	3.00139	0.237244	-3.28	3.795	-1.84	22.9	3.588	0.071	0.802	0.311	8.1054	3.84899
2474	NM_000517.4:c.177C>G	HBA2:c.177C>G	NM_000517.4:c.177C>G	NP_000508.1:p.(H59Q)	VUS	VUS	Missense codons	16:223205-223205	missense_variant	0.03	0.549168	0.995792	0	0.502	0	0.484114	0.83145		0.388	0.955	0.598	0.585	0.09418			0.532	0.8287	-8.31	0.518112	0.121755	-3.71	3.105	-7.02	13	-5.126	-0.246	0.661	0.602	5.0302	0.871917
2480	NM_000517.4:c.388delC	HBA2:c.388delC	NM_000517.4:c.388delC	NP_000508.1:p.(L130Wfs*4)	VUS	P/LP	Frameshift	16:223557-223558	frameshift_variant						0
2481	NM_000517.4:c.-24C>G	HBA2:c.-24C>G	NM_000517.4:c.-24C>G	NP_000508.1:p.?	B/LB	B/LB	5'UTR	16:222888-222888	5_prime_UTR_variant						0																			0.616
2483	NM_000517.4:c.95+1G>T	HBA2:c.95+1G>T	NM_000517.4:c.95+1G>T	NP_000508.1:p.?	VUS	VUS	Splice donor	16:223007-223007	splice_donor_variant						0.99									0.999972	0.928									34							8.504	101.13
2485	NM_000558.5:c.232C>T	HBA1:c.232C>T	NM_000558.5:c.232C>T	NP_000549.1:p.(P78S)	VUS	VUS	Missense codons	16:227064-227064	missense_variant	0.37	0.676563	1	0.053453	0.146	0	0.502233	0.980185	0.915808	0.0351	0.557	0.815	0.517	0.18222			0.032	0.7064	1.98	1.05677	0.216331	-3.07		-2.33	10.74	-0.614	0.947	0.133	0.026	8.5688	1.27673
2486	NM_000517.4:c.232C>T	HBA2:c.232C>T	NM_000517.4:c.232C>T	NP_000508.1:p.(P78S)	VUS	VUS	Missense codons	16:223260-223260	missense_variant	0.37	0.676563	1	0.053453	0.146	0	0.713863	0.970123		-0.2779	0.557	0.619	0.383	0.27545			0.032	0.545	-1.1	0.441728	0.184754	-3.07	2.085	-2.33	8.008	-0.319	0.938	0.251	0.044	9.2318	0.438516
2487	NM_000517.4:c.94A>G	HBA2:c.94A>G	NM_000517.4:c.94A>G	NP_000508.1:p.(R32G)	P/LP	P/LP	Splice region variant; Missense codons	16:223005-223005	missense_variant,splice_region_variant	0	0.497415	1	0	0.968	0.29	0.993823	0.996257		0.8551	0.898	0.86	0.511	0.94785	0.99961	0.942	0.855	0.9217	2.8	4.77221	0.464458	-3.42	4.17	-6.71	33	3.09	1.264	1	0.989	5.4349	6.19289	2.904	34.5344
2488	NM_000517.4:c.75T>A	HBA2:c.75T>A	NM_000517.4:c.75T>A	NP_000508.1:p.(Y25*)	P/LP	P/LP	Stop gained	16:222986-222986	stop_gained		0.516011	1	0.000267		0.63		0.988264					0.476	0.23912					0.426	1.22431	0.60412				33	-1.423	-0.499	0.001	0.179	7.5443	2.10629
2489	NM_000517.4:c.11C>A	HBA2:c.11C>A	NM_000517.4:c.11C>A	NP_000508.1:p.(S4Y)	VUS	VUS	Missense codons	16:222922-222922	missense_variant	0	0.516011	0.993404	0.099858	0.08	0	0.43621	0.976221		0.7439	0.496	0.585	0.524	0.83345			0.45	0.8188	3.78	1.77254	0.26447	-3.55	3.1	-4.26	22	1.978	0.991	0.759	0.643	14.6725	1.89035
2490	NM_000518.4:c.358G>A	HBB:c.358G>A	NM_000518.4:c.358G>A	NP_000509.1:p.(G120S)	VUS	VUS	Missense codons	11:5246914-5246914	missense_variant	0.08	0.500041	0.711523		0.118	0.01	0.937585	0.995179	0.894311	0.4968	0.615	0.611	0.554	0.4869			0.309	0.7613	3.75	1.23487	0.275701	-3.61	3.39	-3.42	17.15	1.906	0.122	0.125	0.452	12.6753	1.4862
2491	NM_000518.4:c.271G>C	HBB:c.271G>C	NM_000518.4:c.271G>C	NP_000509.1:p.(E91Q)	VUS	VUS	Missense codons	11:5247851-5247851	missense_variant	0.11	0.487112	0.991484		0.733		0.910205	0.998533	0.915608	0.7584	0.805	0.874	0.619	0.65869			0.54	0.8178	5.24	4.17767	0.278306	-3.21	3.06	-2.62	23.7	0.993	1.025	0.987	0.938	11.354	4.41923
2492	NM_000518.4:c.37A>C	HBB:c.37A>C	NM_000518.4:c.37A>C	NP_000509.1:p.(T13P)	VUS	VUS	Missense codons	11:5248215-5248215	missense_variant	0.01	0.487112	1		0.958	0.02	0.494702	0.900993	0.769523	0.57	0.306	0.666	0.562	0.14922			0.807	0.8227	-10.5	0.1293	0.223649	-2.45	3.51	-3.17	8.672	-3.145	-0.937	0	0	4.7661	0.286647
2493	NM_000517.4:c.123delG	HBA2:c.123delG	NM_000517.4:c.123delG	NP_000508.1:p.(T42Pfs*8)	P/LP	P/LP	Frameshift	16:223150-223151	frameshift_variant						0.05																			32
2494	NM_000518.4:c.-35A>G	HBB:c.-35A>G	NM_000518.4:c.-35A>G	NP_000509.1:p.?	B/LB	B/LB	5'UTR	11:5248286-5248286	5_prime_UTR_variant						0																			16.47
2495	NM_000518.4:c.316-373C>A	HBB:c.316-373C>A	NM_000518.4:c.316-373C>A	NP_000509.1:p.?	B/LB	B/LB		11:5247329-5247329	intron_variant						0																			3.093
2496	NC_000011.9:g.5246646C>T	HBB:c.*182G>A	NM_000518.4:c.*182G>A		B/LB	B/LB	Downstream transcript variant	11:5246646-5246646	downstream_gene_variant																									1.194
2499	NM_000558.5:c.38C>A	HBA1:c.38C>A	NM_000558.5:c.38C>A	NP_000549.1:p.(A13D)	VUS	B/LB	Missense codons	16:226753-226753	missense_variant	0.03	0.516011	0.999999	0.019397	0.025	0.04	0.732114	0.921249	0.59544	0.1918	0.952	0.683	0.837	0.37941			0.365	0.7522	-0.294	0.785292	0.375822	-3.18		-2.27	14.56	-0.107	0.917	0.002	0.003	9.9529	0.987962
2500	NM_000558.5:c.142G>C	HBA1:c.142G>C	NM_000558.5:c.142G>C	NP_000549.1:p.(D48H)	VUS	B/LB	Missense codons	16:226974-226974	missense_variant	0	0.623552	0.64507	0	0.65	0.01	0.993278	0.989742	0.89551	0.7965	0.964	0.753	0.568	0.87685			0.672	0.8337	3.33	2.18979	0.475001	-3.43		-6.63	22.4	2.438	0.21	0.77	0.949	8.5269	2.47975
2501	NM_000558.5:c.153C>A	HBA1:c.153C>A	NM_000558.5:c.153C>A	NP_000549.1:p.(H51Q)	VUS	VUS	Missense codons	16:226985-226985	missense_variant	0.15	0.623552	0.999909	0.020335	0.018	0	0.411189	0.854417	0.510449	-0.0623	0.926	0.522	0.477	0.09683			0.241	0.6494	-8.62	0.277638	0.350528	-2.98		-2.62	0.324	-1.449	-0.821	0.69	0.559	10.6222	0.422674
2501	NM_000558.5:c.153C>G	HBA1:c.153C>G	NM_000558.5:c.153C>G	NP_000549.1:p.(H51Q)	VUS	VUS	Missense codons	16:226985-226985	missense_variant	0.15	0.623552	0.999909	0.020335	0.018	0.01	0.411189	0.815428	0.510449	-0.0623	0.926	0.562	0.477	0.08127			0.241	0.6494	-8.62	0.277638	0.350525	-2.98		-2.62	0.486	-1.449	-0.821	0.69	0.559	10.6222	0.422674
2502	NM_000558.5:c.154G>C	HBA1:c.154G>C	NM_000558.5:c.154G>C	NP_000549.1:p.(G52R)	VUS	VUS	Missense codons	16:226986-226986	missense_variant	0.02	0.623552	0.970298	0.000303	0.503	0.1	0.992679	0.99649	0.914509	0.7259	0.959	0.792	0.695	0.79118			0.551	0.8326	3.33	2.25449	0.426853	-3.29		-6.62	22.7	0.759	0.152	0.697	0.545	7.6432	2.51772
2503	NM_000558.5:c.226G>T	HBA1:c.226G>T	NM_000558.5:c.226G>T	NP_000549.1:p.(D76Y)	VUS	B/LB	Missense codons	16:227058-227058	missense_variant	0.01	0.676563	0.999956	1.6e-05	0.971	0	0.997103	0.957724	0.693531	0.7118	0.973	0.751	0.876	0.64484			0.819	0.845	2.3	1.0802	0.466922	-3.5		-7.51	22.9	-0.049	1.083	0.124	0.028	9.6869	1.30821
2504	NM_000558.5:c.233C>A	HBA1:c.233C>A	NM_000558.5:c.233C>A	NP_000508.1:p.(P78H)	VUS	B/LB	Missense codons	16:227065-227065	missense_variant	0.03	0.676563	1	0.053453	0.078	0	0.959155	0.993863	0.868713	0.1069	0.934	0.628	0.661	0.25309			0.37	0.727	2.12	1.08401	0.411731	-3.13	2.61	-4.1	15.89	-0.745	0.947	0.12	0.022	9.5476	1.31729
2505	NM_000558.5:c.237C>G	HBA1:c.237C>G	NM_000558.5:c.237C>G	NP_000549.1:p.(N79K)	VUS	B/LB	Missense codons	16:227069-227069	missense_variant	0.03	0.676563	1	0.544796	0.006	0	0.0685531	0.778825	0.555844	-0.1461	0.945	0.467	0.734	0.09238			0.364	0.6721	-2.59	0.189624	0.0598612	-3.08		-1.16	8.558	-5.082	-3.053	0	0.002	6.1704	0.274761
2506	NM_000558.5:c.262C>T	HBA1:c.262C>T	NM_000558.5:c.262C>T	NP_000549.1:p.(H88Y)	P/LP	P/LP	Missense codons	16:227094-227094	missense_variant	0	0.676563	0.999999	0	0.993	0	0.997108	0.995121	0.984202	0.9264	0.989	0.924	0.864	0.96328			0.895	0.9916	3.34	2.93022	0.549899	-7.53		-5.74	24.1	5.421	0.947	0.991	0.952	12.7929	3.09099
2507	NM_000558.5:c.283G>A	HBA1:c.283G>A	NM_000558.5:c.283G>A	NP_000549.1:p.(D95N)	VUS	P/LP	Missense codons	16:227115-227115	missense_variant	0.01	0.676563	0.999999	0	0.879	0	0.994311	0.997927	0.918408	0.9915	0.995	0.907	0.829	0.9795			0.748	0.8852	4.31	4.54572	0.20504	-3.32		-4.18	25.7	9.054	1.083	0.998	0.998	16.1331	4.24777
2508	NM_000558.5:c.362C>A	HBA1:c.362C>A	NM_000558.5:c.362C>A	NP_000549.1:p.(A121E)	VUS	B/LB	Missense codons	16:227343-227343	missense_variant	1	0.549168	1	0.003865	0.009	0	0.114294	0.747821	0.561544	-0.2755	0.914	0.523	0.354	0.03286			0.001	0.5839	-4.59	0.622162	0.271697	-2.91		1.94	0.607	0.117	1.023	0.904	0.774	11.5418	0.785646
2509	NM_000558.5:c.49A>G	HBA1:c.49A>G	NM_000558.5:c.49A>G	NP_000549.1:p.(K17E)	VUS	VUS	Missense codons	16:226764-226764	missense_variant	0.01	0.623552	0.913952	0.00054	0.075	0	0.48845	0.69427	0.817418	0.6119	0.876	0.732	0.75	0.97426			0.411	0.8066	3.33	1.39176	0.247385	-3.3		-3.75	17.27	4.897	0.175	0.001	0	8.1392	1.57608
2510	NM_000558.5:c.84G>C	HBA1:c.84G>C	NM_000558.5:c.84G>C	NP_000549.1:p.(E28D)	VUS	B/LB	Missense codons	16:226799-226799	missense_variant	0.15	0.623552	0.979393	4.7e-05	0.205	0	0.909617	0.994324	0.911709	0.3146	0.98	0.761	0.598	0.68708			0.261	0.765	-1.34	1.41436	0.404637	-3.21		-2.83	14.05	0.037	0.159	0.732	0.663	6.3623	1.63233
2518	NM_000517.4:c.45G>A	HBA2:c.45G>A	NM_000517.4:c.45G>A	NP_000508.1:p.(W15*)	P/LP	P/LP	Stop gained	16:222956-222956	stop_gained		0.516011	1	8e-06		0.3		0.992679					0.656	0.96719					3.72	2.62616	0.60412				34	3.884	1.13	0.032	0.026	9.6591	4.06473
2519	NM_000517.4:c.382A>T	HBA2:c.382A>T	NM_000517.4:c.382A>T	NP_000508.1:p.(K128*)	VUS	P/LP	Stop gained	16:223552-223552	stop_gained		0.676563	1	0		0		0.993406					0.924	0.89336					3.11	3.94939	0.60412				37	4.491	1.297	0.969	0.367	9.3484	5.28985
2522	NM_000518.4:c.209delG	HBB:c.209delG	NM_000518.4:c.209delG	NP_000509.1:p.(G70Vfs*20)	P/LP	P/LP	Frameshift	11:5247912-5247913	frameshift_variant						0																			15.36
2523	NM_000518.4:c.88G>C	HBB:c.88G>C	NM_000518.4:c.88G>C	NP_000509.1:p.(G30R)	VUS	VUS	Missense codons	11:5248164-5248164	missense_variant	0.04	0.487112	0.825639		0.996		0.988822	0.999212	0.985051	0.8595	0.772	0.641	0.594	0.90237			0.81	0.7902	4.33	5.6344	0.25187	-2.26	3.5	-4.32	25.4	0.696	1.025	1	0.959	9.594	6.27779
2525	NM_000518.4:c.199_207dupAAAGTGCTC	HBB:c.199_207dupAAAGTGCTC	NM_000518.4:c.199_207dupAAAGTGCTC	NP_000509.1:p.(K67_L69dup)	P/LP	P/LP	Inframe indels	11:5247922-5247922	inframe_insertion
2526	NM_000517.4:c.428A>T	HBA2:c.428A>T	NM_000517.4:c.428A>T	NP_000508.1:p.(*143Lext*31)	P/LP	P/LP	Stop lost	16:223598-223598	stop_lost		0.095506	1			0		0.83076					0.156	0.90491					2.17	4.34146	0.0891644				13.26	1.214	-0.053	0.088	0.887	7.0529	6.2821
2527	NM_000517.4:c.343_344insCC	HBA2:c.343_344insCC	NM_000517.4:c.343_344insCC	NP_000508.1:p.(A116Pfs*19)	P/LP	P/LP	Frameshift	16:223513-223513	frameshift_variant
2528	NM_000558.5:c.193G>A	HBA1:c.193G>A	NM_000558.5:c.193G>A	NP_000549.1:p.(D65N)	VUS	P/LP	Missense codons	16:227025-227025	missense_variant	0.49	0.676563	1	0.093574	0.012	0	0.206449	0.97915	0.887111	0.0138	0.91	0.295	0.527	0.15869			0.011	0.7321	2.34	0.781061	0.0826141	-3.07		-1.77	10.8	0.103	1.153	0.22	0.582	9.8199	0.900967
2529	NM_000558.5:c.151_152insGGAGCC	HBA1:c.151_152insGGAGCC	NM_000558.5:c.151_152insGGAGCC	NP_000549.1:p.(S50_H51insRS)	VUS	P/LP	Inframe indels	16:226983-226983	inframe_insertion
2530	NM_000517.4:c.383A>G	HBA2:c.383A>G	NM_000517.4:c.383A>G	NP_000508.1:p.(K128R)	VUS	VUS	Missense codons	16:223553-223553	missense_variant	0.01	0.676563	0.999995	0	1	0.03	0.999576	0.998579		1.0732	0.735	0.873	0.591	0.82702			0.905	0.9357	4.24	6.33044	0.32908	-3.46	4.295	-2.79	26.9	8.378	1.297	0.967	0.32	12.5712	8.00503
2531	NM_000518.4:c.136T>G	HBB:c.136T>G	NM_000518.4:c.136T>G	NP_000509.1:p.(F46V)	VUS	VUS	Missense codons	11:5247986-5247986	missense_variant	0	0.487112	1		0.999	0	0.99713	0.991099	0.982702	1.09	0.932	0.971	0.86	0.96914			0.935	0.9391	5.1	12.641	0.524168	-3.43	4.47	-6.27	27.7	8.664	1.311	0.926	0.988	14.1449	13.1256
2532	NM_000558.5:c.310C>G	HBA1:c.310C>G	NM_000558.5:c.310C>G	NP_000549.1:p.(H104D)	VUS	VUS	Missense codons	16:227291-227291	missense_variant	0	0.676563	1	1e-06	0.957	0	0.997214	0.988788	0.849215	0.9503	0.795	0.884	0.311	0.95414			0.845	0.8675	4.45	4.20768	0.365655	-3.08		-7.31	24.8	3.365	1.01	0.997	0.921	16.4459	3.97609
2533	NM_000518.4:c.233A>C	HBB:c.233A>C	NM_000518.4:c.233A>C	NP_000509.1:p.(H78P)	VUS	VUS	Missense codons	11:5247889-5247889	missense_variant	0	0.487112	0.997739		0.497	0	0.978958	0.969098	0.935706	0.8599	0.698	0.827	0.734	0.97802			0.611	0.8678	5.1	2.88404	0.414902	-3.26	3.865	-5.82	23.3	7.455	1.137	0.701	0.447	14.1449	3.07145
2534	NM_000518.4:c.250G>A	HBB:c.250G>A	NM_000518.4:c.250G>A	NP_000509.1:p.(G84S)	VUS	VUS	Missense codons	11:5247872-5247872	missense_variant	0.11	0.487112	0.754286		0.448	0	0.81025	0.997856	0.666133	0.7653	0.567	0.609	0.594	0.34169			0.418	0.8038	4.3	1.88146	0.20676	-3.11	2.715	-2.7	22.8	0.057	1.025	1	0.948	7.6835	1.96415
2535	NM_000517.4:c.146_163delTGAGCCACGGCTCTGCCC	HBA2:c.146_163delTGAGCCACGGCTCTGCCC	NM_000517.4:c.146_163delTGAGCCACGGCTCTGCCC	NP_000508.1:p.(L49_A54del)	VUS	VUS	Inframe indels	16:223173-223191	inframe_deletion
2536	NM_000518.4:c.-21T>A	HBB:c.-21T>A	NM_000518.4:c.-21T>A	NP_000509.1:p.?	VUS	P/LP	5'UTR	11:5248272-5248272	5_prime_UTR_variant															9.41033e-05	0.026									12.4
2537	NM_000518.4:c.406G>A	HBB:c.406G>A	NM_000518.4:c.406G>A	NP_000509.1:p.(A136T)	VUS	VUS	Missense codons	11:5246866-5246866	missense_variant	0.15	0.500041	0.998471		0.001	0	0.155581	0.970872	0.69603	-0.4341	0.387	0.526	0.287	0.43549			0.241	0.6106	-2.13	0.792514	0.115407	-3.36	1.78	-0.62	16.96	0.116	-0.251	0.997	0.999	1.8714	0.716658
2538	NM_000517.4:c.77G>A	HBA2:c.77G>A	NM_000517.4:c.77G>A	NP_000508.1:p.(G26D)	P/LP	P/LP	Missense codons	16:222988-222988	missense_variant	0	0.516011	0.999436	3e-05	0.998	0	0.995857	0.993774		0.7077	0.837	0.847	0.806	0.87282			0.919	0.9422	-1.42	2.08836	0.31996	-4.06	4.63	-5.11	20.4	3.365	0.139	0.002	0.322	8.9047	3.39051
2539	NM_000558.5:c.283_300+3dup	HBA1:c.283_300+3dup	NM_000558.5:c.283_300+3dup	NP_000549.1:p.(V94_K100dup)	P/LP	P/LP	Inframe indels	16:227135-227135	splice_region_variant,intron_variant
2540	NM_000517.4:c.414_416delinsTCT	HBA2:c.414_416delinsTCT	NM_000517.4:c.414_416delinsTCT	NP_000508.1:p.(S139L)	VUS	VUS	Missense codons	16:223584-223586	missense_variant
2542	NM_000518.4:c.7C>A	HBB:c.7C>A	NM_000518.4:c.7C>A	NP_000509.1:p.(H3N)	VUS	VUS	Missense codons	11:5248245-5248245	missense_variant	0.11	0.487112	0.821394		0.015	0	0.272851	0.949925	0.766923	-0.0846	0.403	0.382	0.602	0.83259			0.272	0.5865	1.05	1.07158	0.0947275	-2.53	2.87	-4.34	10.47	1.045	-0.646	0.026	0.069	8.6579	0.985445
2543	NM_000518.4:c.38C>T	HBB:c.38C>T	NM_000518.4:c.38C>T	NP_000509.1:p.(T13I)	VUS	VUS	Missense codons	11:5248214-5248214	missense_variant	0.08	0.487112	1		0.386	0	0.493037	0.972971	0.485551	0.0165	0.321	0.554	0.514	0.14874			0.423	0.6793	-2.8	0.370602	0.127431	-2.45	1.86	-2.66	1.888	-0.726	-0.613	0	0	0.7048	0.463189
2544	NM_000518.4:c.122G>C	HBB:c.122G>C	NM_000518.4:c.122G>C	NP_000509.1:p.(R41T)	VUS	P/LP	Missense codons	11:5248000-5248000	missense_variant	0	0.487112	1		0.998		0.995063	0.985761	0.951105	0.8682	0.846	0.879	0.651	0.93493			0.919	0.8511	5.1	7.49834	0.415969	-3.27	1.99	-5.15	27.4	4.517	1.025	0.998	0.997	17.6123	6.98202
2545	NM_000518.4:c.286A>C	HBB:c.286A>C	NM_000518.4:c.286A>C	NP_000509.1:p.(K96Q)	VUS	VUS	Missense codons	11:5247836-5247836	missense_variant	0.02	0.487112	1		0.216	0	0.92646	0.987891	0.873013	0.4812	0.684	0.714	0.614	0.93312			0.404	0.7798	5.24	3.46193	0.209012	-3.23	2.855	-3.23	23.6	2.405	1.137	1	0.917	8.9478	3.05567
2546	NC_000011.9:g.5248427G>A	HBB:c.-176C>T	NM_000518.4:c.-176C>T		B/LB	B/LB	Promoter	11:5248427-5248427	upstream_gene_variant																									0.79
2549	NM_000517.4:c.264C>A	HBA2:c.264C>A	NM_000517.4:c.264C>A	NP_000508.1:p.(H88Q)	VUS	P/LP	Missense codons	16:223292-223292	missense_variant	0	0.676563	0.999988	0	0.847	0	0.999599	0.982459		1.0802	0.993	0.743	0.781	0.62827			0.77	0.9922	0.796	1.62361	0.492451	-7.53	4.735	-7.65	21.5	-0.58	0.081	0.785	0.253	4.7892	2.47157
2553	NM_000518.4:c.44delT	HBB:c.44delT	NM_000518.4:c.44delT	NP_000509.1:p.(L15Rfs*5)	P/LP	P/LP	Frameshift	11:5248207-5248208	frameshift_variant						0.06
2564	NM_000518.4:c.*118A>G	HBB:c.*118A>G	NM_000518.4:c.*118A>G	NP_000509.1:p.?	VUS	VUS	Other 3'UTR site	11:5246710-5246710	3_prime_UTR_variant						0																			5.521
2565	NC_000011.9:g.5248326C>A	HBB:c.-75G>T	NM_000518.4:c.-75G>T		P/LP	P/LP	Promoter	11:5248326-5248326	upstream_gene_variant																									14.61
2571	NM_000558.5:c.329T>C	HBA1:c.329T>C	NM_000558.5:c.329T>C	NP_000549.1:p.(L110P)	P/LP	P/LP	Missense codons	16:227310-227310	missense_variant	0.01	0.676563	1	0.008324	0.994	0	0.99258	0.996906	0.813219	1.0248	0.839	0.879	0.862	0.98056			0.858	0.9099	4.45	2.67132	0.541428	-3.87		-5.84	24.1	5.502	1.123	0.945	0.859	13.1986	2.96564
2576	NM_000517.4:c.206delA	HBA2:c.206delA	NM_000517.4:c.206delA	NP_000508.1:p.(N69Tfs*16)	VUS	P/LP	Frameshift	16:223233-223234	frameshift_variant						0
2951	NM_000517.4:c.356C>T	HBA2:c.356C>T	NM_000517.4:c.356C>T	NP_000508.1:p.(T119I)	P/LP	P/LP	Missense codons	16:223526-223526	missense_variant	0	0.59774	0.989056	6.6e-05	0.041	0	0.912794	0.994288		0.6482	0.528	0.69	0.745	0.61538			0.447	0.8429	3.26	1.8045	0.304348	-3.49	4.155	-4.89	22.5	0.655	-0.818	0.015	0.544	9.711	1.99812
2952	NM_000517.4:c.275T>G	HBA2:c.275T>G	NM_000517.4:c.275T>G	NP_000508.1:p.(L92R)	VUS	B/LB	Missense codons	16:223303-223303	missense_variant	0	0.676563	0.999996	1e-06	0.997	0	0.998784	0.996628		1.0139	0.669	0.934	0.849	0.98303			0.911	0.9033	4.22	5.40408	0.412367	-3.27	4.69	-5.6	25	7.318	1.04	0.769	0.317	12.555	6.67861
2953	NM_000517.4:c.139T>A	HBA2:c.139T>A	NM_000517.4:c.139T>A	NP_000508.1:p.(F47I)	VUS	VUS	Missense codons	16:223167-223167	missense_variant	0.01	0.516011	0.99966	0.000249	0.229	0.03	0.944984	0.967847		0.3611	0.707	0.593	0.437	0.90215			0.429	0.8243	0.261	1.71948	0.192642	-3.52	3.16	-4.54	18.56	0.76	0.136	0.984	0.996	4.758	1.95352
2954	NM_000518.4:c.129delT	HBB:c.129delT	NM_000518.4:c.129delT	NP_000509.1:p.(F43Lfs*19)	P/LP	P/LP	Frameshift	11:5247992-5247993	frameshift_variant						0
2955	NM_000517.4:c.149_172del	HBA2:c.149_172del	NM_000517.4:c.149_172del	NP_000508.1:p.(S53_G60del)	VUS	P/LP	Inframe indels	16:223176-223200	inframe_deletion
2956	NM_000517.4:c.275T>A	HBA2:c.275T>A	NM_000517.4:c.275T>A	NP_000508.1:p.(L92H)	VUS	B/LB	Missense codons	16:223303-223303	missense_variant	0	0.676563	0.999993	1e-06	0.999	0	0.997109	0.98428		0.9188	0.527	0.868	0.884	0.98287			0.935	0.8696	4.22	4.81034	0.377552	-3.24	3.305	-6.45	24.8	7.318	1.04	0.769	0.317	12.555	5.5641
2957	NM_000517.4:c.96-1G>A	HBA2:c.96-1G>A	NM_000517.4:c.96-1G>A	NP_000508.1:p.?	VUS	P/LP	Splice acceptor	16:223123-223123	splice_acceptor_variant						1									0.999988	0.734									33							8.75	65.4303
2958	NM_000518.4:c.24dupG	HBB:c.24dupG	NM_000518.4:c.24dupG	NP_000509.1:p.(K9Efs*15)	P/LP	P/LP	Frameshift	11:5248227-5248227	frameshift_variant																									24.4
2959	NM_000518.4:c.158delA	HBB:c.158delA	NM_000518.4:c.158delA	NP_000509.1:p.(D53Vfs*9)	P/LP	P/LP	Frameshift	11:5247963-5247964	frameshift_variant						0
2960	NM_000518.4:c.142_142dupG	HBB:c.142_142dupG	NM_000518.4:c.142_142dupG	NP_000509.1:p.(D48Gfs*6)	P/LP	P/LP	Frameshift	11:5247979-5247979	frameshift_variant																									32
2961	NM_000518.4:c.434A>C	HBB:c.434A>C	NM_000518.4:c.434A>C	NP_000509.1:p.(K145T)	VUS	P/LP	Missense codons	11:5246838-5246838	missense_variant	0	0.487112	0.999793		0.218	0.03	0.952044	0.994372	0.979842	0.3923	0.444	0.634	0.504	0.93401			0.466	0.8028	-0.345	1.8551	0.267215	-3.44	3.715	-3.28	22	1.855	1.137	0.99	0.981	8.679	2.07431
2962	NM_000518.4:c.119A>C	HBB:c.119A>C	NM_000518.4:c.119A>C	NP_000509.1:p.(Q40P)	VUS	P/LP	Missense codons	11:5248003-5248003	missense_variant	0.02	0.487112	0.999995		0.996	0	0.991724	0.995202	0.884412	0.8601	0.727	0.907	0.831	0.87818			0.845	0.911	1.28	4.61323	0.49348	-3.49	4.125	-5.26	24	3.8	1.137	1	0.999	6.4116	5.69425
2963	NM_000518.4:c.23A>T	HBB:c.23A>T	NM_000518.4:c.23A>T	NP_000509.1:p.(E8V)	VUS	VUS	Missense codons	11:5248229-5248229	missense_variant	0	0.487112	1		0.973		0.975071	0.991292	0.979402	1.0631	0.724	0.881	0.937	0.9817			0.859	0.9185	5.24	6.63545	0.49794	-3.36	4.32	-5.75	24.9	7.127	1.137	0.019	0.004	14.3909	8.09751
2964	NM_000518.4:c.161C>T	HBB:c.161C>T	NM_000518.4:c.161C>T	NP_000509.1:p.(A54V)	VUS	VUS	Missense codons	11:5247961-5247961	missense_variant	0.02	0.487112	1		0.999	0	0.996088	0.99891	0.953005	1.042	0.931	0.77	0.858	0.90675			0.873	0.9182	5.1	6.525	0.305556	-3.27	3.485	-3.83	25.7	4.32	1.175	0.201	0.712	17.6123	7.72152
2965	NM_000518.4:c.270_273delTGAG	HBB:c.270_273delTGAG	NM_000518.4:c.270_273delTGAG	NP_000509.1:p.(E91Cfs*67)	P/LP	P/LP	Frameshift	11:5247848-5247852	frameshift_variant						0																			32
2966	NM_000518.4:c.296_297dup	HBB:c.296_297dup	NM_000518.4:c.296_297dup	NP_000509.1:p.(D100Wfs*60)	P/LP	P/LP	Frameshift	11:5247825-5247825	frameshift_variant
2967	NM_000517.4:c.-59C>T	HBA2:c.-59C>T	NM_000517.4:c.-59C>T	NP_000508.1:p.?	VUS	VUS	Promoter	16:222853-222853	upstream_gene_variant						0																			7.34
2968	NM_000558.5:c.110T>A	HBA1:c.110T>A	NM_000558.5:c.110T>A	NP_000549.1:p.(F37Y)	VUS	VUS	Missense codons	16:226942-226942	missense_variant	1	0.623552	0.893271	0.002911	0.03	0	0.286054	0.924123	0.60384	-0.2001	0.577	0.508	0.368	0.28944			0.002	0.5792	2.07	1.51554	0.119532	-2.97		-0.11	14.09	1.65	1.115	0.981	0.993	3.8067	1.65135
2969	NM_000518.4:c.215T>A	HBB:c.215T>A	NM_000518.4:c.215T>A	NP_000509.1:p.(F72Y)	VUS	P/LP	Missense codons	11:5247907-5247907	missense_variant	0	0.487112	0.63435		0.987		0.969661	0.993792	0.791621	1.1748	0.697	0.654	0.594	0.93051			0.881	0.9048	5.1	4.04783	0.234869	-3.37	3.845	-2.52	23.9	3.859	1.311	0.58	0.407	14.1449	5.12163
2970	NM_000517.4:c.254G>C	HBA2:c.254G>C	NM_000517.4:c.254G>C	NP_000508.1:p.(S85T)	VUS	VUS	Missense codons	16:223282-223282	missense_variant	0	0.676563	0.999785	0	0.935	0	0.998542	0.979519		0.9454	0.834	0.821	0.513	0.92126			0.825	0.9135	3.26	2.56296	0.311136	-3.28	4.135	-2.81	21.9	7.439	0.151	0.269	0.067	8.6636	3.6532
2971	NC_000016.9:g.222831C>A	HBA2:c.-81C>A	NM_000517.4:c.-81C>A		B/LB	B/LB	Promoter	16:222831-222831	upstream_gene_variant																									6.965
2972	NM_000518.4:c.126C>A	HBB:c.126C>A	NM_000518.4:c.126C>A	NP_000509.1:p.(F42L)	VUS	B/LB	Missense codons	11:5247996-5247996	missense_variant	0.04	0.487112	0.939757		0.303	0	0.948595	0.998394	0.875712	0.337	0.814	0.625	0.672	0.87769			0.443	0.7023	4.19	3.38391	0.204914	-2.88	2.51	-4.69	24	1.924	1.175	0.972	0.986	5.8737	3.01952
2973	NM_000518.4:c.363A>T	HBB:c.363A>T	NM_000518.4:c.363A>T	NP_000509.1:p.(K121N)	VUS	B/LB	Missense codons	11:5246909-5246909	missense_variant	0.06	0.500041	0.999999		0.007		0.0345973	0.870457	0.824018	-0.2154	0.433	0.403	0.42	0.08077			0.323	0.6656	-2.04	0.183361	0.0501204	-3.28	1.765	-2.75	6.03	-1.119	-1.193	0.008	0.067	0.5432	0.19688
2974	NM_000518.4:c.62T>C	HBB:c.62T>C	NM_000518.4:c.62T>C	NP_000509.1:p.(V21A)	VUS	P/LP	Missense codons	11:5248190-5248190	missense_variant	0.05	0.487112	1		0.178	0.16	0.128999	0.959574	0.759324	-0.6046	0.607	0.583	0.563	0.1803			0.362	0.3953	1.62	0.682495	0.12822	-2.03	1.07	-2.67	10.35	0.902	0.323	0.002	0.032	5.0269	0.611851
2975	NM_000518.4:c.257T>G	HBB:c.257T>G	NM_000518.4:c.257T>G	NP_000509.1:p.(F86C)	VUS	P/LP	Missense codons	11:5247865-5247865	missense_variant	0	0.487112	0.961229		0.93	0	0.98646	0.98807	0.839616	0.8574	0.745	0.7	0.663	0.7127			0.821	0.8706	-2.04	2.00518	0.271821	-3.16	3.9	-7.26	23.4	0.979	1.311	0.99	0.845	12.0533	2.83589
2976	NM_000518.4:c.194G>T	HBB:c.194G>T	NM_000518.4:c.194G>T	NP_000509.1:p.(G65V)	VUS	VUS	Missense codons	11:5247928-5247928	missense_variant	0	0.487112	1		1	0	0.999159	0.99788	0.985701	1.0903	0.925	0.921	0.982	0.96978			0.945	0.9479	5.1	10.9275	0.502076	-3.43	4.635	-8.51	27.1	5.502	1.025	0.997	0.763	17.6123	12.174
2977	NM_000517.4:c.41C>A	HBA2:c.41C>A	NM_000517.4:c.41C>A	NP_000508.1:p.(A14D)	VUS	VUS	Missense codons	16:222952-222952	missense_variant	0.01	0.516011	1	0.958026	0.829	0.07	0.903113	0.976539		0.2854	0.424	0.517	0.413	0.12541			0.72	0.815	-4.27	0.716122	0.13422	-3.15	2.87	-3.09	16.98	-0.153	0.1	0.019	0.042	4.8565	1.13105
2978	NM_000517.4:c.53T>A	HBA2:c.53T>A	NM_000517.4:c.53T>A	NP_000508.1:p.(V18D)	VUS	VUS	Missense codons	16:222964-222964	missense_variant	0	0.516011	0.997832	0.569157	0.969	0.11	0.765425	0.907136		0.6867	0.749	0.542	0.639	0.51994			0.856	0.907	2.84	1.79714	0.279696	-3.59	3.82	-5.51	22.6	2.253	1.095	0.002	0.006	5.9102	2.84209
2979	NM_000517.4:c.223G>T	HBA2:c.223G>T	NM_000517.4:c.223G>T	NP_000508.1:p.(D75Y)	VUS	VUS	Missense codons	16:223251-223251	missense_variant	0.01	0.676563	1	0	0.995	0	0.997902	0.96202		1.1019	0.867	0.819	0.825	0.95359			0.863	0.9427	4.22	3.63685	0.483466	-3.69	3.79	-7.53	23.8	4.509	1.133	0.286	0.039	15.6564	5.09802
2980	NM_000517.4:c.245C>A	HBA2:c.245C>A	NM_000517.4:c.245C>A	NP_000508.1:p.(S82Y)	VUS	VUS	Missense codons	16:223273-223273	missense_variant	0.01	0.676563	0.999688	0.000495	0.976	0	0.997451	0.992094		1.063	0.735	0.657	0.596	0.65805			0.824	0.9122	4.22	2.42463	0.297002	-3.23	3.88	-5.23	23.6	0.989	0.938	0.038	0.005	15.6564	3.52414
2981	NM_000517.4:c.419A>G	HBA2:c.419A>G	NM_000517.4:c.419A>G	NP_000508.1:p.(K140R)	VUS	VUS	Missense codons	16:223589-223589	missense_variant	0.09	0.676563	0.999995	0	0.063	0	0.970006	0.996527		0.4637	0.728	0.739	0.355	0.9137			0.3	0.751	4.43	2.71428	0.219218	-3.21	2.42	-2.56	22.5	2.488	0.315	0.948	0.946	11.4713	2.52463
2982	NM_000558.5:c.185A>G	HBA1:c.185A>G	NM_000558.5:c.185A>G	NP_000549.1:p.(K62R)	VUS	VUS	Missense codons	16:227017-227017	missense_variant	0.01	0.676563	0.989628	0.00034	0.337	0	0.99003	0.996377	0.907909	0.8789	0.836	0.816	0.483	0.81466			0.512	0.8439	4.31	2.87912	0.260519	-3.2		-2.8	23.1	2.256	1.286	0.997	0.932	12.9419	2.99918
2983	NM_000558.5:c.84G>T	HBA1:c.84G>T	NM_000558.5:c.84G>T	NP_000549.1:p.(E28D)	VUS	B/LB	Missense codons	16:226799-226799	missense_variant	0.15	0.623552	0.979393	4.7e-05	0.205	0.01	0.575108	0.995004	0.911709	0.3146	0.98	0.761	0.598	0.65474			0.261	0.765	-1.34	1.41436	0.213673	-3.21		-2.83	14.16	0.037	0.159	0.732	0.663	6.3623	1.63233
2984	NM_000558.5:c.374C>G	HBA1:c.374C>G	NM_000558.5:c.374C>G	NP_000549.1:p.(S125C)	VUS	VUS	Missense codons	16:227355-227355	missense_variant	0.02	0.549168	0.988331	0.000171	0.989	0	0.993306	0.984855	0.908309	0.9065	0.627	0.721	0.554	0.96185			0.823	0.8567	3.19	2.12186	0.278188	-3.28		-3.07	22.9	5.279	0.136	0.566	0.765	11.6889	2.46205
2985	NM_000558.5:c.307A>C	HBA1:c.307A>C	NM_000558.5:c.307A>C	NP_000549.1:p.(S103R)	VUS	VUS	Missense codons	16:227288-227288	missense_variant	0.03	0.676563	0.992507	0.019344	0.107	0	0.333	0.982115	0.665433	-0.1167	0.961	0.572	0.75	0.16968			0.373	0.626	-4.12	1.07921	0.402105	-3.08		-3.81	15.52	-0.527	1.291	0.993	0.855	4.5296	1.26798
2986	NM_000558.5:c.98T>C	HBA1:c.98T>C	NM_000558.5:c.98T>C	NP_000549.1:p.(M33T)	P/LP	P/LP	Splice region variant; Missense codons	16:226930-226930	missense_variant,splice_region_variant	0.31	0.623552	1	1e-06	0.134	0	0.0353658	0.759492	0.651635	0.4098	0.791	0.639	0.525	0.8126			0.038	0.7974	0.773	2.94386	0.00272146	-3.28		-2.13	11.98	1.309	0.18	0.405	0.908	7.6679	4.61142	-0.033	-0.246766
2987	NM_000558.5:c.28A>G	HBA1:c.28A>G	NM_000558.5:c.28A>G	NP_000549.1:p.(N10D)	VUS	VUS	Missense codons	16:226743-226743	missense_variant	0.24	0.623552	1	0.061865	0.323	0.02	0.101632	0.969422	0.889211	-0.0396	0.702	0.469	0.533	0.28073			0.139	0.6728	0.786	0.626864	0.0903562	-3.12		-2.44	10.04	-0.474	-0.192	0.004	0.003	4.7351	0.749372
2988	NC_000016.9:g.222821G>A	HBA2:c.-91G>A	NM_000517.4:c.-91G>A		VUS	P/LP	Promoter	16:222821-222821	upstream_gene_variant																									2.979
2990	NM_000518.4:c.167_179del	HBB:c.167_179del	NM_000518.4:c.167_179del	NP_000509.1:p.(M56Rfs*2)	P/LP	P/LP	Frameshift	11:5247942-5247955	frameshift_variant
2991	NM_000558.5:c.326C>A	HBA1:c.326C>A	NM_000558.5:c.326C>A	NP_000549.1:p.(T109N)	P/LP	P/LP	Missense codons	16:227307-227307	missense_variant	0	0.676563	0.614391	2.4e-05	0.888	0	0.912125	0.988757	0.975102	0.5767	0.621	0.757	0.774	0.7464			0.792	0.7666	2.46	1.85913	0.0140902	-3.25		-3.93	22.4	0.871	1.01	0.98	0.937	7.1343	2.11489
2993	NM_000558.5:c.149G>A	HBA1:c.149G>A	NM_000558.5:c.149G>A	NP_000549.1:p.(S50N)	P/LP	VUS	Missense codons	16:226981-226981	missense_variant	0.07	0.623552	0.999999	0.000229	0.007	0.09	0.86198	0.956631	0.715328	0.5613	0.582	0.492	0.426	0.11313			0.319	0.8512	-0.816	1.02489	0.133647	-3.26		-1.17	10.35	0.153	1.152	0.868	0.867	18.345	1.23561
2994	NM_000518.4:c.418A>C	HBB:c.418A>C	NM_000518.4:c.418A>C	NP_000509.1:p.(N140H)	VUS	VUS	Missense codons	11:5246854-5246854	missense_variant	0.76	0.487112	1		0.012	0	0.0599892	0.987702	0.556544	-0.5392	0.4	0.435	0.475	0.10622			0.002	0.5308	0.75	0.661267	0.0767071	-3.34	1.54	0.39	11.65	0.337	0.199	0.898	0.993	4.027	0.501943
2995	NM_000558.5:c.85G>A	HBA1:c.85G>A	NM_000558.5:c.85G>A	NP_000549.1:p.(A29T)	VUS	P/LP	Missense codons	16:226800-226800	missense_variant	0.19	0.623552	0.999789	6e-06	0.309	0	0.981534	0.997855	0.909609	0.5089	0.779	0.698	0.403	0.96334			0.146	0.7902	3.47	2.9036	0.0869704	-3.29		-1.76	18.87	3.849	1.052	0.799	0.713	10.55	2.98234
2996	NM_000558.5:c.220G>A	HBA1:c.220G>A	NM_000558.5:c.220G>A	NP_000549.1:p.(V74M)	VUS	VUS	Missense codons	16:227052-227052	missense_variant	0.22	0.676563	1	0.635001	0.044	0	0.101233	0.917211	0.720328	-0.3625	0.379	0.323	0.283	0.0376			0.045	0.5813	-8.62	0.0404424	0.0251153	-3.14		-0.34	0.002	-2.66	-1.956	0	0.005	4.2683	0.0851684
2997	NC_000011.9:g.5248373A>T	HBB:c.-122T>A	NM_000518.4:c.-122T>A		P/LP	P/LP	Promoter	11:5248373-5248373	upstream_gene_variant																									15.89
2998	NM_000518.4:c.178A>C	HBB:c.178A>C	NM_000518.4:c.178A>C	NP_000509.1:p.(K60Q)	VUS	VUS	Missense codons	11:5247944-5247944	missense_variant	0.05	0.487112	0.970042		0.307	0	0.59479	0.98986	0.851815	0.3314	0.712	0.704	0.712	0.80623			0.441	0.6841	3.95	1.86584	0.213588	-3.17	1.605	-2.2	19.01	2.956	1.137	0.377	0.695	11.232	1.88465
2999	NM_000517.4:c.107C>T	HBA2:c.107C>T	NM_000517.4:c.107C>T	NP_000508.1:p.(S36F)	VUS	P/LP	Missense codons	16:223135-223135	missense_variant	0.01	0.516011	1	0.035597	0.918	0.01	0.986899	0.994031		0.3049	0.541	0.526	0.5	0.02501			0.774	0.8691	-3.14	1.09004	0.156943	-3.19	3.26	-3.67	20	-0.181	0.991	0.597	0.993	12.0136	1.61191
3000	NM_000558.5:c.55G>A	HBA1:c.55G>A	NM_000558.5:c.55G>A	NP_000549.1:p.(G19S)	VUS	VUS	Missense codons	16:226770-226770	missense_variant	0.74	0.623552	1	0.002807	0.03	0.09	0.390671	0.978654	0.777022	0.3685		0.532	0.273	0.49525			0.003	0.7564	4.43	1.37276	0.193516	-3.04		-1.8	13.46	-0.053	1.048	0.003	0	11.6599	1.64989
3001	NM_000518.4:c.335T>G	HBB:c.335T>G	NM_000518.4:c.335T>G	NP_000509.1:p.(V112G)	VUS	VUS	Missense codons	11:5246937-5246937	missense_variant	0	0.487112	0.999954		0.903	0	0.990843	0.996061	0.928207	0.8444	0.618	0.818	0.603	0.71282			0.802	0.8563	4.68	3.63412	0.418012	-3.31	3.275	-4.47	25.3	2.855	1.311	0.436	0.897	7.0898	4.44661
3004	NM_000518.4:c.124T>G	HBB:c.124T>G	NM_000518.4:c.124T>G	NP_000509.1:p.(F42V)	VUS	VUS	Missense codons	11:5247998-5247998	missense_variant	0.04	0.487112	0.973615		0.949	0	0.99516	0.990444	0.90181	1.0091	0.833	0.765	0.682	0.94863			0.742	0.8802	5.1	8.68715	0.300915	-3.1	3.865	-5.59	27.1	6.881	1.311	0.994	0.995	14.1449	8.83054
3005	NM_000518.4:c.55G>C	HBB:c.55G>C	NM_000518.4:c.55G>C	NP_000509.1:p.(V19L)	VUS	VUS	Missense codons	11:5248197-5248197	missense_variant	0.16	0.487112	0.931027		0.345		0.724859	0.997566	0.928407	0.8168	0.8	0.634	0.484	0.82332			0.168	0.8217	5.24	3.29887	0.242431	-3.22	2.165	-2.13	18.96	1.551	1.025	0.373	0.302	17.9125	3.22633
3007	NM_000518.4:c.9T>C	HBB:c.9T>C	NM_000518.4:c.9T>C	NP_000509.1:p.(H3=)	B/LB	B/LB	Synonymous substitution	11:5248243-5248243	synonymous_variant						0.02																			0.319
3008	NM_000518.4:c.93-16A>T	HBB:c.93-16A>T	NM_000518.4:c.93-16A>T	NP_000509.1:p.?	VUS	VUS		11:5248045-5248045	intron_variant																									1.471							-1.302	-13.7125
3009	NM_000518.4:c.265C>A	HBB:c.265C>A	NM_000518.4:c.265C>A	NP_000509.1:p.(L89M)	VUS	VUS	Missense codons	11:5247857-5247857	missense_variant	0	0.487112	1		0.999	0	0.990478	0.995361	0.966803	1.0879	0.895	0.834	0.829	0.97001			0.935	0.9661	5.24	8.34323	0.472217	-4.33	4.3	-1.93	24.7	7.482	1.175	0.123	0.533	17.9125	10.2075
3011	NM_000518.4:c.315+81C>T	HBB:c.315+81C>T	NM_000518.4:c.315+81C>T	NP_000509.1:p.?	B/LB	B/LB		11:5247726-5247726	intron_variant						0																			2.377
3012	NM_000518.4:c.315+255T>C	HBB:c.315+255T>C	NM_000518.4:c.315+255T>C	NP_000509.1:p.?	B/LB	B/LB		11:5247552-5247552	intron_variant						0																			6.148
3013	NM_000518.4:c.316-208C>G	HBB:c.316-208C>G	NM_000518.4:c.316-208C>G	NP_000509.1:p.?	B/LB	B/LB		11:5247164-5247164	intron_variant																									1.039
3014	NM_000518.4:c.8delA	HBB:c.8delA	NM_000518.4:c.8delA	NP_000509.1:p.(H3Lfs*2)	P/LP	P/LP	Frameshift	11:5248243-5248244	frameshift_variant						0
3015	NM_000558.5:c.190G>A	HBA1:c.190G>A	NM_000558.5:c.190G>A	NP_000549.1:p.(A64T)	VUS	VUS	Missense codons	16:227022-227022	missense_variant	0.05	0.676563	0.999999	0.006698	0.084	0	0.801463	0.994306	0.850515	0.0943	0.533	0.647	0.513	0.14029			0.351	0.7232	3.32	1.38231	0.136486	-3.07		-2.19	18.99	0.189	0.229	0.541	0.845	8.5845	1.63512
3016	NM_000558.5:c.371C>T	HBA1:c.371C>T	NM_000558.5:c.371C>T	NP_000549.1:p.(A124V)	VUS	VUS	Missense codons	16:227352-227352	missense_variant	0.33	0.549168	0.985817	0.001248	0.012	0	0.93506	0.99346	0.889511	1.0811	0.748	0.748	0.215	0.79222			0.025	0.8838	4.17	2.29855	0.278487	-3.28		-2.59	16.44	3.178	1.023	0.744	0.778	15.857	2.59186
3019	NM_000518.4:c.206_212delTCGGTGC	HBB:c.206_212delTCGGTGC	NM_000518.4:c.206_212delTCGGTGC	NP_000509.1:p.(L69Pfs*19)	P/LP	P/LP	Frameshift	11:5247909-5247916	frameshift_variant
3023	NM_000518.4:c.108C>G	HBB:c.108C>G	NM_000518.4:c.108C>G	NP_000509.1:p.(Y36*)	P/LP	P/LP	Stop gained	11:5248014-5248014	stop_gained		0.487112	1					0.995563					0.836	0.92214					4.19	5.60265	0.60412				39	2.702	0.223	0.989	0.993	9.2224	7.05603
3024	NM_000518.4:c.335-346del12bp	HBB:c.335-346del12bp	NM_000518.4:c.335-346del12bp	NP_000509.1:p.?	VUS	P/LP	Inframe indels	11:5247282-5247283	intron_variant						0
3026	NM_000558.5:c.148A>C	HBA1:c.148A>C	NM_000558.5:c.148A>C	NP_000549.1:p.(S50R)	VUS	VUS	Missense codons	16:226980-226980	missense_variant	0.11	0.623552	0.999995	0.000229	0.797	0	0.956413	0.992184	0.816118	0.0099	0.642	0.644	0.533	0.08024			0.571	0.7017	-1.48	0.924382	0.268252	-3.3		-2.56	15.16	-0.353	1.285	0.866	0.891	1.6373	1.11329
3027	NM_000517.4:c.3G>T	HBA2:c.3G>T	NM_000517.4:c.3G>T	NP_000508.1:p.(M1?)	P/LP	P/LP	Initiation codon	16:222914-222914	start_lost	0	0.516011	1	4e-06	0.999	0	0.997612	0.993838		0.9906	0.996	0.842	0.966	0.9882			0.935	0.8873	3.78	4.53637	0.60412	-3.15		-2.37	23.8	6.932	1.135	0.995	0.837	14.6725	5.03353
3028	NM_000517.4:c.358C>T	HBA2:c.358C>T	NM_000517.4:c.358C>T	NP_000508.1:p.(P120S)	VUS	P/LP	Missense codons	16:223528-223528	missense_variant	0.02	0.59774	0.999998	0	0.114	0	0.996928	0.995859		0.6201	0.884	0.76	0.638	0.87127			0.392	0.8056	3.25	2.72286	0.346198	-3.3	4.16	-6.09	22.6	2.703	1.015	0.021	0.576	11.8036	3.10016
3029	NM_000517.4:c.364_366dupGTG	HBA2:c.364_366dupGTG	NM_000517.4:c.364_366dupGTG	NP_000508.1:p.(V122dup)	VUS	P/LP	Inframe indels	16:223536-223536	inframe_insertion
3030	NM_000558.5:c.91G>T	HBA1:c.91G>T	NM_000558.5:c.91G>T	NP_000549.1:p.(E31*)	P/LP	P/LP	Stop gained	16:226806-226806	stop_gained		0.623552	1	0.942072		0.1		0.996411					0.477	0.83047					2.32	4.1112	0.574913				36	0.808	1.052	0.891	0.819	8.4642	6.09262
3031	NM_000558.5:c.300+1G>A	HBA1:c.300+1G>A	NM_000558.5:c.300+1G>A	NP_000549.1:p.?	P/LP	P/LP	Splice donor	16:227133-227133	splice_donor_variant						0.98									0.999965	0.866									33							8.182	85.2558
3032	NM_000558.5:c.85G>T	HBA1:c.85G>T	NM_000558.5:c.85G>T	NP_000549.1:p.(A29S)	P/LP	P/LP	Missense codons	16:226800-226800	missense_variant	0.05	0.623552	0.99949	6e-06	0.919	0	0.993215	0.99723	0.892111	0.6591	0.754	0.759	0.893	0.98019			0.715	0.8155	3.47	2.99637	0.26674	-3.31		-1.69	23.3	3.849	1.052	0.799	0.713	10.55	3.0819
3033	NM_000517.4:c.95+27C>T	HBA2:c.95+27C>T	NM_000517.4:c.95+27C>T	NP_000508.1:p.?	B/LB	B/LB		16:223033-223033	intron_variant						0																			2.068
3034	NM_000518.4:c.412_413delinsTG	HBB:c.412_413delinsTG	NM_000518.4:c.412_413delinsTG	NP_000509.1:p.(V138W)	VUS	VUS	Missense codons	11:5246859-5246860	missense_variant	0				0.997												0.911
3035	NM_000518.4:c.79G>C	HBB:c.79G>C	NM_000518.4:c.79G>C	NP_000509.1:p.(E27Q)	VUS	VUS	Missense codons	11:5248173-5248173	missense_variant	0.25	0.487112	0.635738		0.858		0.740879	0.997177	0.943606	0.8324	0.832	0.651	0.567	0.78405			0.368	0.7443	4.31	4.12829	0.169982	-2.54	2.215	-2.29	23.3	1.148	1.025	0.999	0.964	14.8757	4.29926
3036	NM_000558.5:c.354_355insTCA	HBA1:c.354_355insTCA	NM_000558.5:c.354_355insTCA	NP_000549.1:p.(F118_T119insS)	VUS	P/LP	Inframe indels	16:227335-227335	inframe_insertion
3037	NM_000517.4:c.55G>C	HBA2:c.55G>C	NM_000517.4:c.55G>C	NP_000508.1:p.(G19R)	VUS	B/LB	Missense codons	16:222966-222966	missense_variant	0.01	0.516011	1	0.002806	0.777	0.07	0.946663	0.996837		0.7613	0.179	0.573	0.803	0.44093			0.696	0.795	3.8	1.45961	0.382492	-3.1	3.73	-3.87	22.5	2.687	1.13	0.006	0.007	14.7479	1.98456
3038	NM_000517.4:c.19G>T	HBA2:c.19G>T	NM_000517.4:c.19G>T	NP_000508.1:p.(D7Y)	VUS	VUS	Missense codons	16:222930-222930	missense_variant	0	0.516011	0.999999	0	1	0	0.999237	0.990681		1.0189	0.846	0.871	0.857	0.97842			0.945	0.919	3.78	4.44692	0.413886	-3.44	4.305	-7.21	23.8	8.93	1.135	0.086	0.013	10.1572	5.90542
3039	NM_000517.4:c.157_180del	HBA2: c.157_180del	NM_000517.4: c.157_180del	NP_000508.1:p.(S53_G60del)	VUS	P/LP	Inframe indels	16:223184-223208	inframe_deletion
3040	NM_000558.5:c.146T>G	HBA1:c.146T>G	NM_000558.5:c.146T>G	NP_000549.1:p.(L49R)	VUS	VUS	Missense codons	16:226978-226978	missense_variant	0	0.623552	1	0.300509	0.859	0	0.926863	0.993319	0.69603	0.1983	0.899	0.621	0.509	0.48239			0.776	0.7731	3.17	1.65515	0.305489	-3.22		-5.19	22.1	2.491	1.115	0.825	0.914	5.7977	1.93915
[truncated: 219 more rows]

## Sheet: On Full dataset
Tool	Threshold	All_SNVs	APV	PV_NV	PV	TP	FN	FP	TN	YR	Accuracy	Sensitivity	Specificity	PPV	NPV	OPP	MCC	LR+	LR+_CI_lower	LR+_CI_upper	LR-	LR-_CI_lower	LR-_CI_upper
[truncated: 546 more rows]

[truncated: 13 more sheets: Input-Splicing, On Splicing, On Splicing (MaxentSscan), Input-Missense, On Missense, Input-Non Missense, On Non Missense, Input-HBA1, On HBA1, Input-HBA2, On HBA2, Input-HBB, On HBB]
