# Supplementary figures and images for: Evaluation of in silico predictors on short nucleotide variants in HBA1, HBA2, and HBB associated with haemoglobinopathies
Source: eLife journal article supplement (doi:10.7554/elife.79713), 2022-12-01

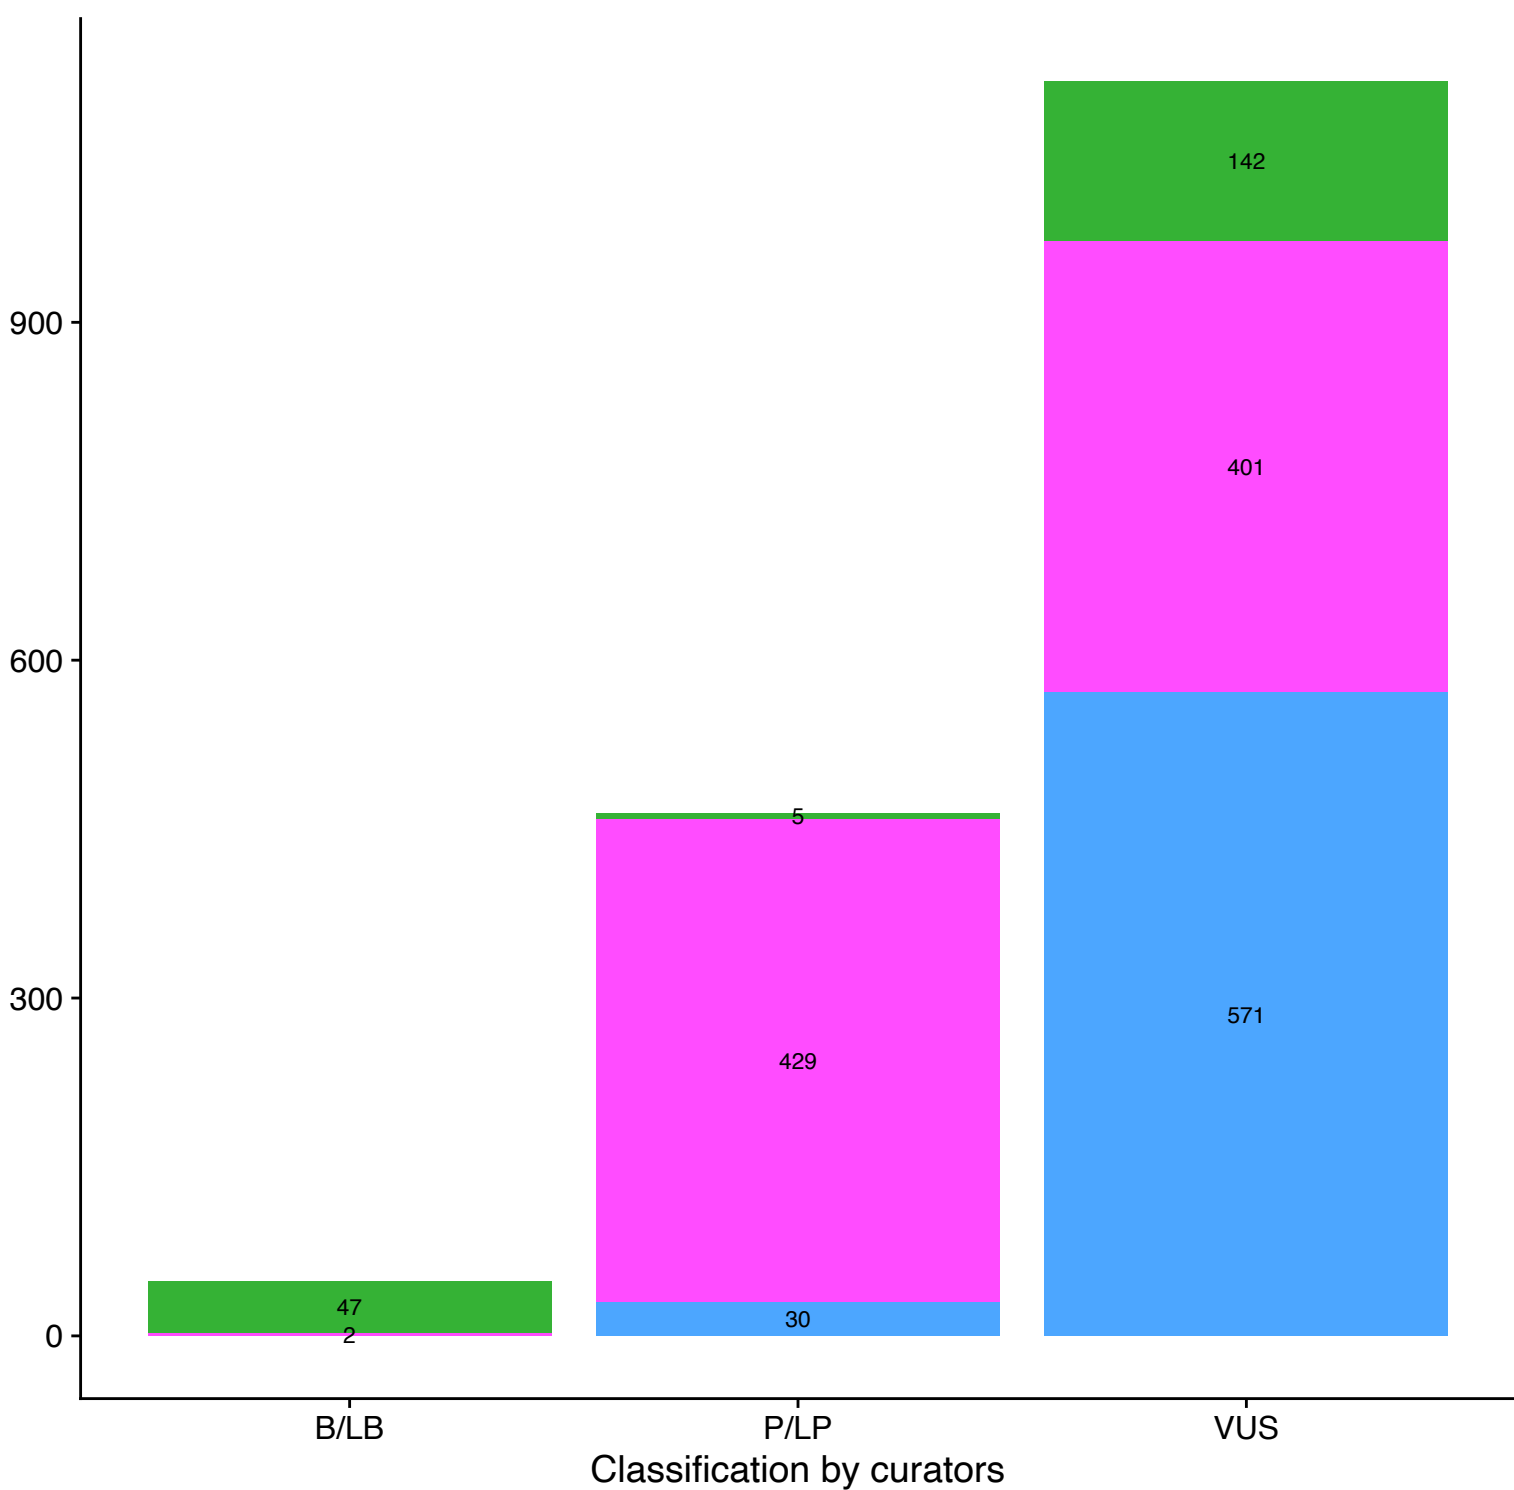

Classification by experts

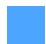

VUS

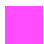

P/LP

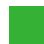

B/LB

Supplement: supp [file elife-79713-supp-v1.zip]

**A**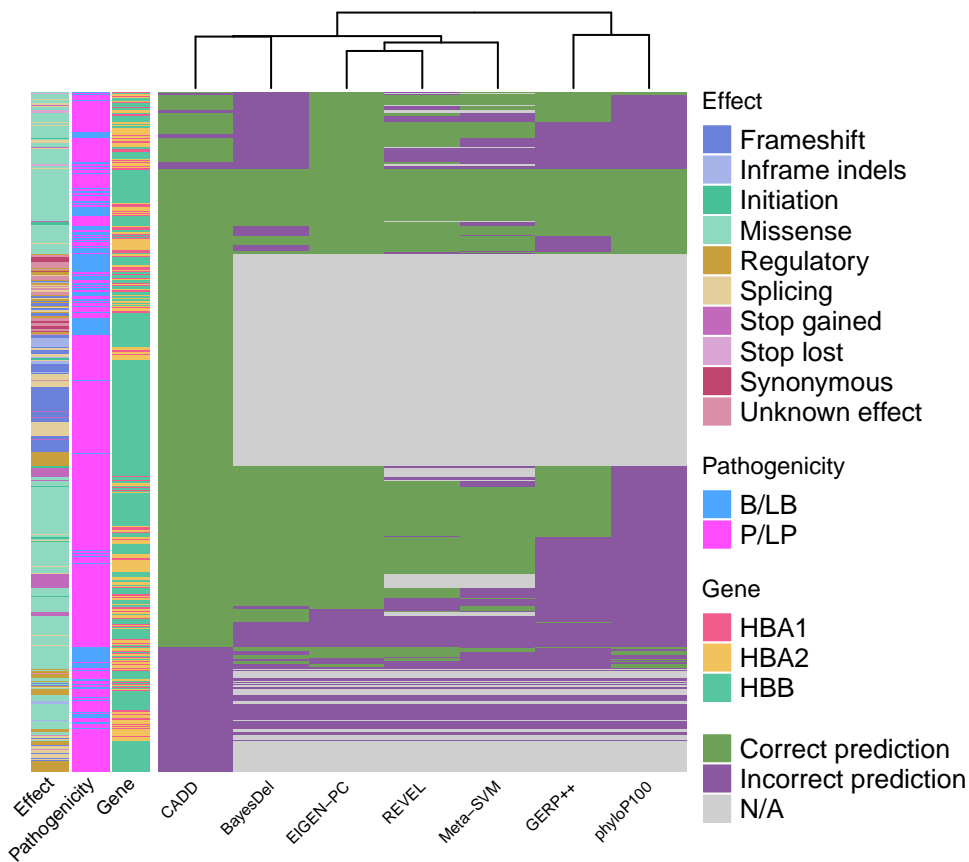**B**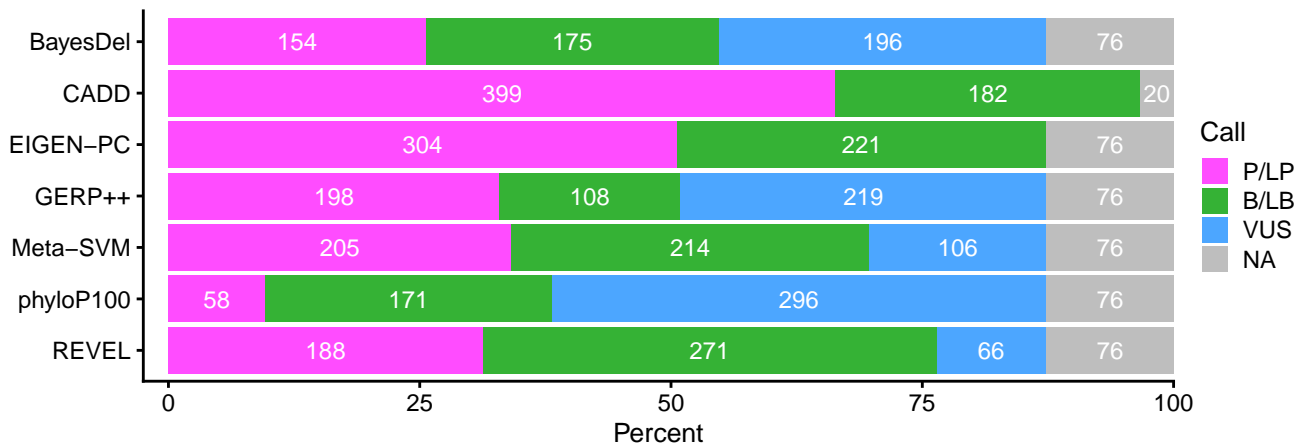

Supplement: supp [file elife-79713-supp-v1.zip]
